# Supplementary material for: Identification and Characterization of Regulatory Pathways Controlling Dormancy Under Lower Temperature in Alfalfa (Medicago sativa L.)
Source: Front Plant Sci. 2022 Jun 2;13:872839. doi: 10.3389/fpls.2022.872839 (PMC9201922; doi:10.3389/fpls.2022.872839)
Supplement: Supplementary Table 1 — qRT-PCR validation of selected DEGs identified by RNA-seq in dormancy (D) and non-dormancy (ND) genotype alfalfa under lower temperature (LT) condition. [file Table_1.XLSX]

## Sheet: Sheet1
M. truncatula ID	Unigene ID	(D+LT)/D		(ND+LT)/ND		D/ND		(D+LT)/(ND+LT)		Annotation
		RNAseq	RTPCR	RNAseq	RTPCR	RNAseq	RTPCR	RNAseq	RTPCR
Medtr1g090937.1	c39704.graph_c0	-1.62216	-3.32609		-1.07336	-3.10017	0.897497	-4.97378	-1.35524	Lectin protein kinase family protein
Medtr7g102380.1	c30573.graph_c0	4.8487	5.9781		-4.85243		0.400415		11.2309	PR-thaumatin superfamily protein
Medtr3g025260.1	c40989.graph_c0	2.8966	1.54629		-0.681668		-0.52675		1.70121	Flavonoid 3'-monooxygenase
Medtr7g084300.1	c35102.graph_c0	2.22871	1.96215		0.207919		1.56389	1.49835	3.31812	Chalcone synthase 1A
Medtr3g082130.1	c51486.graph_c0	2.35251	2.54806		-1.36897	-1.51147	-0.178948		3.73809	LRR family protein
Medtr2g010600.1	c36839.graph_c0	3.0153	3.7057		-3.13674		-0.797144	2.74766	6.0453	Pathogenesis-related protein
Medtr3g065300.1	c51337.graph_c1		-0.78033	1.52666	0.963143	-1.93669	0.374891	-3.50123	-1.36858	Embryo defective 2656
Medtr1g031690.1	c52848.graph_c0	1.86055	0.412809		-0.576748	-1.28572	0.31572		1.30528	DNA gyrase/topoisomerase IV
Medtr5g030110.1	c42090.graph_c0	2.03797	-0.335027		-1.55609	2.84186	-0.0173687	4.88505	1.20369	RPA1 domain protein
Medtr6g023340.1	c37034.graph_c0	2.46946	0.683429		2.22724		0.60982		-0.93399	Glycosyl hydrolases family 18
Medtr7g117405.1	c34472.graph_c0	1.51282	3.48068	3.44201	3.3282		0.227857	-2.46847	0.380333	UDP-Glycosyltransferase superfamily protein
Medtr2g090710.1	c44800.graph_c0	2.08503	1.94225		-1.15724		-0.249056	3.49611	2.85044	Leucine rich repeat XI
Medtr5g056140.1	c49839.graph_c0	1.05	3.06508	2.21	1.11543		-0.212369		1.73728	Endonuclease 2
R=0.64

## Sheet: Sheet2
Unigene ID	Forward	Reverse
c39704.graph_c0	AGACTTGCTCTTCCTATAA	CTTGAGTGGGAAGATTTG
c30573.graph_c0	AAGCCTACCCAATACTC	GTCCTTTGAAGCAAGTAA
c40989.graph_c0	GCTACCTTGGTTCATTC	GCACAGCTCTCATAATAC
c35102.graph_c0	CTAAGGAGGAAGGAAAGA	GAACACTATGAAGCACAA
c51486.graph_c0	TAGACCCTGAAAGTTTATTG	GTATGGAGGTGATGATATTG
c36839.graph_c0	GAAGAGTGAGGGAATACA	TATAACTTCCAGTTCCAAAG
c51337.graph_c1	CTCTGACCAACTCTATGT	GTACCGAAGCAGAAGTA
c52848.graph_c0	ACACAGAGCACATCTAC	CTCGTCTTCCTACCATAC
c42090.graph_c0	GAGAAGGTCTGGCTAATA	GATCAACCATCATATCCTAC
c37034.graph_c0	TCGAGAGGAATGCTATG	GCAGGAGATCTCGTAAT
c34472.graph_c0	AGGCACAAAGAGGTAATA	TCCAAGACAAGCATACA
c44800.graph_c0	CTGCTAGCAACAAACTC	ATCAGGAGCCAGTAATC
c49839.graph_c0	GAGCTGGGTAGTGTAAT	GCTGATACACCTGATAATG
MsACTIN	GGTGAGATCGGAGGGTATAA	AGCATCACAATCACTCCTTAC
