# Supplementary material for: Identification and Characterization of Regulatory Pathways Controlling Dormancy Under Lower Temperature in Alfalfa (Medicago sativa L.)
Source: Front Plant Sci. 2022 Jun 2;13:872839. doi: 10.3389/fpls.2022.872839 (PMC9201922; doi:10.3389/fpls.2022.872839)
Supplement: Supplementary Table 2 — Differentially expressed genes in dormancy (D) and non-dormancy (ND) genotype alfalfa under lower temperature (LT) condition. [file Table_2.XLSX]

## Sheet: (D+LT) VS D
#GeneID	ID	D+LT_count	D+LT_FPKM	D_count	D_FPKM	(D+LT)_VS_D_DESeq2_FDR	(D+LT)_VS_D__DESeq2_(FDR_0.01_FC_2)_regulated	(D+LT)_vs_D_DESeq2_log2FC	COG_class	COG_class_annotation	GO_annotation	KEGG_annotation	KOG_class	KOG_class_annotation	Pfam_annotation	Swissprot_annotation	eggNOG_class	eggNOG_class_annotation	nr_annotation	GO_second_level_annotation	KEGG_pathway_annotation
Medtr8g105590.JCVIMt4.0v1	c36231.graph_c0	579	14.04	11	0.27	6.52e-102	up	5.24838	[R]	General function prediction only	Molecular Function: core promoter binding (GO:0001047);; Biological Process: regulation of transcription, DNA-templated (GO:0006355);; Biological Process: circadian rhythm (GO:0007623);; Biological Process: response to blue light (GO:0009637);; Biological Process: positive regulation of flower development (GO:0009911);;	K12116|0|mtr:MTR_8g105590|K12116 flavin-binding kelch repeat F-box protein 1 | (RefSeq) flavin-binding kelch repeat F-box protein, putative	--	--	Galactose oxidase, central domain;; Galactose oxidase, central domain;; Kelch motif;; Kelch motif;; Kelch motif;; Kelch motif;; PAS domain;; PAS fold;; PAS fold;; F-box domain	Adagio protein 3 OS=Arabidopsis thaliana OX=3702 GN=ADO3 PE=1 SV=1	O	Posttranslational modification, protein turnover, chaperones	flavin-binding kelch repeat F-box protein, putative [Medicago truncatula]	molecular function: binding (GO:0005488);; biological process: biological regulation (GO:0065007);; biological process: rhythmic process (GO:0048511);; biological process: response to stimulus (GO:0050896)	Circadian rhythm - plant (ko04712)
Medtr7g090140.JCVIMt4.0v1	c46486.graph_c0	1702	48.31	38.67	1.12	8.81e-176	up	5.23998	[I]	Lipid transport and metabolism	Molecular Function: iron ion binding (GO:0005506);; Biological Process: fatty acid biosynthetic process (GO:0006633);; Cellular Component: integral component of membrane (GO:0016021);; Molecular Function: oxidoreductase activity (GO:0016491);; Biological Process: oxidation-reduction process (GO:0055114);;	K15404|0|mtr:MTR_7g090140|K15404 aldehyde decarbonylase [EC:4.1.99.5] | (RefSeq) fatty acid hydroxylase superfamily protein	--	--	WAX2 C-terminal domain;; Fatty acid hydroxylase superfamily	Protein ECERIFERUM 1 OS=Arabidopsis thaliana OX=3702 GN=CER1 PE=1 SV=1	S	Function unknown	fatty acid hydroxylase superfamily protein [Medicago truncatula]	molecular function: binding (GO:0005488);; biological process: metabolic process (GO:0008152);; biological process: cellular process (GO:0009987);; biological process: single-organism process (GO:0044699);; cellular component: membrane (GO:0016020);; cellular component: membrane part (GO:0044425);; molecular function: catalytic activity (GO:0003824)	Cutin, suberine and wax biosynthesis (ko00073)
Medtr3g107397.JCVIMt4.0v1	c14945.graph_c0	697.67	63.79	17	1.51	2.76e-124	up	5.06819	--	--	Molecular Function: heat shock protein binding (GO:0031072);; Molecular Function: unfolded protein binding (GO:0051082);;	--	--	--	--	--	S	Function unknown	chaperon protein P13.9, putative [Medicago truncatula]	molecular function: binding (GO:0005488)	--
Medtr5g013440.JCVIMt4.0v1	c53785.graph_c0	635	40.78	15.33	0.95	2.24e-108	up	5.03936	--	--	Cellular Component: extracellular region (GO:0005576);; Biological Process: sexual reproduction (GO:0019953);;	--	--	--	Pollen allergen;; Lytic transglycolase	Expansin-like B1 OS=Arabidopsis thaliana OX=3702 GN=EXLB1 PE=2 SV=2	G	Carbohydrate transport and metabolism	expansin-B1-like protein [Medicago truncatula]	cellular component: extracellular region (GO:0005576);; biological process: reproduction (GO:0000003);; biological process: reproductive process (GO:0022414);; biological process: multi-organism process (GO:0051704)	--
Medtr7g102380.JCVIMt4.0v1	c30573.graph_c0	929.67	66.39	28	2	8.96e-156	up	4.8487	--	--	Molecular Function: 2-amino-4-hydroxy-6-hydroxymethyldihydropteridine diphosphokinase activity (GO:0003848);; Molecular Function: dihydroneopterin aldolase activity (GO:0004150);;	--	--	--	Thaumatin family	Thaumatin-like protein 1a OS=Malus domestica OX=3750 GN=TL1 PE=1 SV=1	S	Function unknown	unknown [Medicago truncatula]	molecular function: catalytic activity (GO:0003824)	--
Medtr1g054765.JCVIMt4.0v1	c45394.graph_c0	1833	107.29	59.67	3.51	8.42e-208	up	4.7914	[T]	Signal transduction mechanisms	Biological Process: response to stress (GO:0006950);; Molecular Function: hydrolase activity (GO:0016787);;	--	--	--	Universal stress protein family	Universal stress protein A-like protein OS=Arabidopsis thaliana OX=3702 GN=At3g01520 PE=1 SV=2	T	Signal transduction mechanisms	adenine nucleotide alpha hydrolase superfamily protein [Medicago truncatula]	biological process: response to stimulus (GO:0050896);; molecular function: catalytic activity (GO:0003824)	--
Medtr6g084640.JCVIMt4.0v1	c39879.graph_c0	1518	365.83	31.33	7.26	6.98e-44	up	4.70612	--	--	Biological Process: response to stress (GO:0006950);; Biological Process: response to water (GO:0009415);;	--	--	--	Dehydrin	--	--	--	Y2K4 dehydrin variant G3, partial [Medicago sativa]	biological process: response to stimulus (GO:0050896)	--
Medtr4g094775.JCVIMt4.0v1	c34127.graph_c2	71.33	13.78	0	0	1.02e-21	up	4.21952	[QV]	Secondary metabolites biosynthesis, transport and catabolism ;; Defense mechanisms	Molecular Function: iron ion binding (GO:0005506);; Cellular Component: endoplasmic reticulum membrane (GO:0005789);; Cellular Component: integral component of membrane (GO:0016021);; Molecular Function: heme binding (GO:0020037);; Molecular Function: isoflavone 2'-hydroxylase activity (GO:0033773);; Biological Process: indole glucosinolate metabolic process (GO:0042343);; Biological Process: sec…	K13260|1.93801e-86|gmx:100784650|K13260 isoflavone 2'-hydroxylase [EC:1.14.13.89] | (RefSeq) isoflavone 2'-hydroxylase-like	[Q]	Secondary metabolites biosynthesis, transport and catabolism	Cytochrome P450	Isoflavone 2&apos;-hydroxylase OS=Medicago truncatula OX=3880 GN=CYP81E7 PE=1 SV=1	Q	Secondary metabolites biosynthesis, transport and catabolism	Isoflavone 2&apos;-hydroxylase, partial [Glycine soja]	molecular function: binding (GO:0005488);; cellular component: cell (GO:0005623);; cellular component: membrane (GO:0016020);; cellular component: organelle (GO:0043226);; cellular component: organelle part (GO:0044422);; cellular component: membrane part (GO:0044425);; cellular component: cell part (GO:0044464);; biological process: metabolic process (GO:0008152);; biological process: single-org…	Isoflavonoid biosynthesis (ko00943)
Medtr4g057240.JCVIMt4.0v1	c39842.graph_c1	7151.33	365.6	423.67	21.18	0	up	4.05792	[P]	Inorganic ion transport and metabolism	Molecular Function: superoxide dismutase activity (GO:0004784);; Molecular Function: copper ion binding (GO:0005507);; Molecular Function: zinc ion binding (GO:0008270);; Cellular Component: chloroplast stroma (GO:0009570);; Cellular Component: thylakoid (GO:0009579);; Biological Process: removal of superoxide radicals (GO:0019430);; Cellular Component: apoplast (GO:0048046);; Biological Process:…	K04565|9.53918e-130|mtr:MTR_4g057240|K04565 superoxide dismutase, Cu-Zn family [EC:1.15.1.1] | (RefSeq) superoxide dismutase [Cu-Zn] protein	[P]	Inorganic ion transport and metabolism	Copper/zinc superoxide dismutase (SODC)	Superoxide dismutase [Cu-Zn], chloroplastic OS=Medicago sativa OX=3879 GN=SODCP PE=2 SV=1	P	Inorganic ion transport and metabolism	superoxide dismutase [Cu-Zn] protein [Medicago truncatula]	biological process: metabolic process (GO:0008152);; biological process: cellular process (GO:0009987);; biological process: single-organism process (GO:0044699);; biological process: response to stimulus (GO:0050896);; biological process: detoxification (GO:0098754);; molecular function: catalytic activity (GO:0003824);; molecular function: antioxidant activity (GO:0016209);; molecular function:…	Peroxisome (ko04146)
Medtr1g019360.JCVIMt4.0v1	c40898.graph_c0	64	3.87	0	0	7.12e-19	up	3.99281	--	--	Cellular Component: membrane (GO:0016020);;	--	--	--	--	--	S	Function unknown	cold regulated protein, putative [Medicago truncatula]	cellular component: membrane (GO:0016020)	--
Medtr6g452730.JCVIMt4.0v1	c39069.graph_c0	507	197.24	29	11.24	6.93e-80	up	3.92615	--	--	--	--	--	--	PAR1 protein	--	S	Function unknown	PAR-1a protein, partial [Trifolium pratense]	--	--
Medtr6g452730.JCVIMt4.0v1	c39069.graph_c1	616.67	74.09	37.33	4.54	1e-75	up	3.83099	--	--	--	--	--	--	PAR1 protein	--	S	Function unknown	PAR1 protein [Medicago truncatula]	--	--
--	c39155.graph_c1	188.67	12.07	9.67	0.63	4.05e-41	up	3.8243	[O]	Posttranslational modification, protein turnover, chaperones	Molecular Function: ATP binding (GO:0005524);; Cellular Component: cytoplasm (GO:0005737);; Biological Process: protein refolding (GO:0042026);;	K04077|1.23093e-112|pvu:PHAVU_006G034900g|K04077 chaperonin GroEL | (RefSeq) hypothetical protein	[O]	Posttranslational modification, protein turnover, chaperones	TCP-1/cpn60 chaperonin family	Chaperonin 60 subunit beta 4, chloroplastic OS=Arabidopsis thaliana OX=3702 GN=CPN60B4 PE=1 SV=1	O	Posttranslational modification, protein turnover, chaperones	hypothetical protein TSUD_242430 [Trifolium subterraneum]	molecular function: binding (GO:0005488);; cellular component: cell (GO:0005623);; cellular component: cell part (GO:0044464);; biological process: cellular process (GO:0009987)	RNA degradation (ko03018)
Medtr3g082630.JCVIMt4.0v1	c47994.graph_c1	393.67	13.51	23.67	0.83	6.04e-63	up	3.79541	--	--	Cellular Component: intracellular (GO:0005622);; Molecular Function: zinc ion binding (GO:0008270);; Cellular Component: integral component of membrane (GO:0016021);;	--	--	--	CCT motif	Zinc finger protein CONSTANS-LIKE 9 OS=Arabidopsis thaliana OX=3702 GN=COL9 PE=1 SV=1	S	Function unknown	B-box type zinc finger protein [Medicago truncatula]	cellular component: cell (GO:0005623);; cellular component: cell part (GO:0044464);; molecular function: binding (GO:0005488);; cellular component: membrane (GO:0016020);; cellular component: membrane part (GO:0044425)	--
Medtr4g094775.JCVIMt4.0v1	c34127.graph_c1	49.33	8.55	0	0	2.03e-16	up	3.75165	--	--	Molecular Function: iron ion binding (GO:0005506);; Cellular Component: endoplasmic reticulum membrane (GO:0005789);; Cellular Component: integral component of membrane (GO:0016021);; Molecular Function: heme binding (GO:0020037);; Molecular Function: isoflavone 2'-hydroxylase activity (GO:0033773);; Biological Process: indole glucosinolate metabolic process (GO:0042343);; Biological Process: sec…	K13260|5.38095e-77|gmx:100784650|K13260 isoflavone 2'-hydroxylase [EC:1.14.13.89] | (RefSeq) isoflavone 2'-hydroxylase-like	[Q]	Secondary metabolites biosynthesis, transport and catabolism	Cytochrome P450	Isoflavone 2&apos;-hydroxylase OS=Glycyrrhiza echinata OX=46348 GN=CYP81E1 PE=1 SV=2	Q	Secondary metabolites biosynthesis, transport and catabolism	PREDICTED: isoflavone 2&apos;-hydroxylase-like [Glycine max]	molecular function: binding (GO:0005488);; cellular component: cell (GO:0005623);; cellular component: membrane (GO:0016020);; cellular component: organelle (GO:0043226);; cellular component: organelle part (GO:0044422);; cellular component: membrane part (GO:0044425);; cellular component: cell part (GO:0044464);; biological process: metabolic process (GO:0008152);; biological process: single-org…	Isoflavonoid biosynthesis (ko00943)
--	c48270.graph_c0	382.67	45.54	24.33	2.85	4.06e-60	up	3.71448	--	--	--	--	--	--	--	--	--	--	--	--	--
Medtr5g011250.JCVIMt4.0v1	c36471.graph_c0	57	2.97	1	0.05	6.57e-18	up	3.69823	[Q]	Secondary metabolites biosynthesis, transport and catabolism	Biological Process: vacuole organization (GO:0007033);; Biological Process: anthocyanin-containing compound biosynthetic process (GO:0009718);; Biological Process: proanthocyanidin biosynthetic process (GO:0010023);; Molecular Function: metal ion binding (GO:0046872);; Molecular Function: leucocyanidin oxygenase activity (GO:0050589);; Biological Process: oxidation-reduction process (GO:0055114);;	K05277|0|mtr:MTR_5g011250|K05277 leucoanthocyanidin dioxygenase [EC:1.14.11.19] | (RefSeq) leucoanthocyanidin dioxygenase-like protein	[QR]	--	non-haem dioxygenase in morphine synthesis N-terminal;; 2OG-Fe(II) oxygenase superfamily	Leucoanthocyanidin dioxygenase OS=Malus domestica OX=3750 GN=ANS PE=2 SV=1	S	Function unknown	leucoanthocyanidin dioxygenase-like protein [Medicago truncatula]	biological process: cellular process (GO:0009987);; biological process: cellular component organization or biogenesis (GO:0071840);; biological process: metabolic process (GO:0008152);; biological process: single-organism process (GO:0044699);; molecular function: binding (GO:0005488);; molecular function: catalytic activity (GO:0003824)	Flavonoid biosynthesis (ko00941)
Medtr8g093620.JCVIMt4.0v1	c38135.graph_c0	124.33	7.73	4	0.35	1.79e-19	up	3.63164	--	--	--	--	--	--	--	--	--	--	hypothetical protein MTR_8g093620 [Medicago truncatula]	--	--
Medtr8g007140.JCVIMt4.0v1	c40849.graph_c0	2900	118.59	228.33	9.07	1.27e-149	up	3.61582	[R]	General function prediction only	Molecular Function: phospholipase activity (GO:0004620);; Cellular Component: cytoplasm (GO:0005737);; Cellular Component: membrane (GO:0016020);; Biological Process: lipid catabolic process (GO:0016042);; Molecular Function: acylglycerol lipase activity (GO:0047372);;	--	[I]	Lipid transport and metabolism	Patatin-like phospholipase	Patatin-like protein 1 OS=Arabidopsis thaliana OX=3702 GN=PLP1 PE=1 SV=2	S	Function unknown	patatin-like phospholipase [Medicago truncatula]	molecular function: catalytic activity (GO:0003824);; cellular component: cell (GO:0005623);; cellular component: cell part (GO:0044464);; cellular component: membrane (GO:0016020);; biological process: metabolic process (GO:0008152);; biological process: single-organism process (GO:0044699)	--
Medtr7g011900.JCVIMt4.0v1	c49232.graph_c0	99.67	4.43	4	0.33	4.5e-22	up	3.61112	[H]	Coenzyme transport and metabolism	Cellular Component: cytosol (GO:0005829);; Cellular Component: integral component of membrane (GO:0016021);; Biological Process: aromatic compound biosynthetic process (GO:0019438);; Molecular Function: licodione 2'-O-methyltransferase activity (GO:0030751);; Biological Process: methylation (GO:0032259);; Molecular Function: isoliquiritigenin 2'-O-methyltransferase activity (GO:0033802);; Molecul…	K13066|0|mtr:MTR_7g011900|K13066 caffeic acid 3-O-methyltransferase [EC:2.1.1.68] | (RefSeq) caffeic acid O-methyltransferase	[R]	General function prediction only	O-methyltransferase;; Dimerisation domain	Isoliquiritigenin 2&apos;-O-methyltransferase OS=Medicago sativa OX=3879 PE=1 SV=1	S	Function unknown	caffeic acid O-methyltransferase [Medicago truncatula]	cellular component: cell (GO:0005623);; cellular component: cell part (GO:0044464);; cellular component: membrane (GO:0016020);; cellular component: membrane part (GO:0044425);; biological process: metabolic process (GO:0008152);; biological process: cellular process (GO:0009987);; molecular function: catalytic activity (GO:0003824);; molecular function: binding (GO:0005488)	Phenylpropanoid biosynthesis (ko00940)
Medtr8g074330.JCVIMt4.0v1	c43027.graph_c1	8000	428.2	524	28.47	1.6e-44	up	3.59098	[G]	Carbohydrate transport and metabolism	Biological Process: polysaccharide catabolic process (GO:0000272);; Molecular Function: chitinase activity (GO:0004568);; Biological Process: chitin catabolic process (GO:0006032);; Biological Process: defense response (GO:0006952);; Molecular Function: chitin binding (GO:0008061);; Biological Process: cell wall macromolecule catabolic process (GO:0016998);;	K20547|0|mtr:MTR_8g074330|K20547 basic endochitinase B [EC:3.2.1.14] | (RefSeq) Chitinase (Class Ib) / Hevein	[R]	General function prediction only	Chitinase class I;; Chitin recognition protein	Endochitinase OS=Pisum sativum OX=3888 PE=2 SV=1	G	Carbohydrate transport and metabolism	Chitinase (Class Ib) / Hevein [Medicago truncatula]	biological process: metabolic process (GO:0008152);; molecular function: catalytic activity (GO:0003824);; biological process: response to stimulus (GO:0050896);; molecular function: binding (GO:0005488);; biological process: cellular process (GO:0009987)	Amino sugar and nucleotide sugar metabolism (ko00520)
Medtr2g070460.JCVIMt4.0v1	c52097.graph_c0	1697.33	37.43	129.33	2.88	4.39e-98	up	3.56119	[Q]	Secondary metabolites biosynthesis, transport and catabolism	Cellular Component: chloroplast thylakoid membrane (GO:0009535);; Biological Process: abscisic acid biosynthetic process (GO:0009688);; Molecular Function: 9-cis-epoxycarotenoid dioxygenase activity (GO:0045549);; Molecular Function: metal ion binding (GO:0046872);; Biological Process: oxidation-reduction process (GO:0055114);;	K09840|0|mtr:MTR_2g070460|K09840 9-cis-epoxycarotenoid dioxygenase [EC:1.13.11.51] | (RefSeq) 9-cis-epoxycarotenoid dioxygenase	[Q]	Secondary metabolites biosynthesis, transport and catabolism	Retinal pigment epithelial membrane protein	9-cis-epoxycarotenoid dioxygenase NCED1, chloroplastic OS=Phaseolus vulgaris OX=3885 GN=NCED1 PE=2 SV=1	Q	Secondary metabolites biosynthesis, transport and catabolism	9-cis-epoxycarotenoid dioxygenase [Medicago truncatula]	cellular component: cell (GO:0005623);; cellular component: membrane (GO:0016020);; cellular component: organelle (GO:0043226);; cellular component: organelle part (GO:0044422);; cellular component: cell part (GO:0044464);; biological process: metabolic process (GO:0008152);; biological process: cellular process (GO:0009987);; biological process: single-organism process (GO:0044699);; molecular f…	Carotenoid biosynthesis (ko00906)
Medtr2g039410.JCVIMt4.0v1	c39256.graph_c0	182.33	5.83	12.33	0.37	7.6e-38	up	3.53187	[C]	Energy production and conversion	Biological Process: cytokinin metabolic process (GO:0009690);; Cellular Component: integral component of membrane (GO:0016021);; Molecular Function: oxidoreductase activity, acting on CH-OH group of donors (GO:0016614);; Molecular Function: cytokinin dehydrogenase activity (GO:0019139);; Molecular Function: flavin adenine dinucleotide binding (GO:0050660);; Biological Process: oxidation-reduction…	K00279|0|mtr:MTR_2g039410|K00279 cytokinin dehydrogenase [EC:1.5.99.12] | (RefSeq) cytokinin oxidase/dehydrogenase-like protein	[C]	Energy production and conversion	Cytokinin dehydrogenase 1, FAD and cytokinin binding;; FAD binding domain	Cytokinin dehydrogenase 3 OS=Arabidopsis thaliana OX=3702 GN=CKX3 PE=1 SV=1	C	Energy production and conversion	cytokinin oxidase/dehydrogenase-like protein [Medicago truncatula]	biological process: metabolic process (GO:0008152);; biological process: cellular process (GO:0009987);; biological process: biological regulation (GO:0065007);; cellular component: membrane (GO:0016020);; cellular component: membrane part (GO:0044425);; biological process: single-organism process (GO:0044699);; molecular function: catalytic activity (GO:0003824);; molecular function: binding (GO…	Zeatin biosynthesis (ko00908)
Medtr4g068770.JCVIMt4.0v1	c36923.graph_c0	1938	115.53	170.67	10.49	2.77e-231	up	3.47326	[S]	Function unknown	Cellular Component: chloroplast inner membrane (GO:0009706);; Cellular Component: integral component of membrane (GO:0016021);;	--	--	--	Uncharacterized protein family, UPF0114	--	S	Function unknown	structural constituent of ribosome protein [Medicago truncatula]	cellular component: cell (GO:0005623);; cellular component: membrane (GO:0016020);; cellular component: organelle (GO:0043226);; cellular component: organelle part (GO:0044422);; cellular component: cell part (GO:0044464);; cellular component: membrane part (GO:0044425)	--
Medtr2g073370.JCVIMt4.0v1	c42092.graph_c0	42	2.83	0.33	0.03	2.87e-14	up	3.47105	--	--	Molecular Function: transcription factor activity, transcription factor binding (GO:0000989);; Cellular Component: nucleus (GO:0005634);; Biological Process: regulation of transcription, DNA-templated (GO:0006355);; Molecular Function: zinc ion binding (GO:0008270);; Biological Process: photomorphogenesis (GO:0009640);;	--	--	--	B-box zinc finger	B-box zinc finger protein 22 OS=Arabidopsis thaliana OX=3702 GN=BBX22 PE=1 SV=2	S	Function unknown	B-box type zinc finger protein [Medicago truncatula]	biological process: biological regulation (GO:0065007);; molecular function: transcription factor activity, protein binding (GO:0000988);; cellular component: cell (GO:0005623);; cellular component: organelle (GO:0043226);; cellular component: cell part (GO:0044464);; molecular function: binding (GO:0005488);; biological process: multicellular organismal process (GO:0032501);; biological process:…	--
Medtr1g017390.JCVIMt4.0v1	c39155.graph_c0	118	5.15	7	0.3	9.17e-26	up	3.46556	[O]	Posttranslational modification, protein turnover, chaperones	Molecular Function: ATP binding (GO:0005524);; Cellular Component: cytoplasm (GO:0005737);; Biological Process: protein refolding (GO:0042026);;	K04077|7.95235e-149|cam:101506252|K04077 chaperonin GroEL | (RefSeq) chaperonin 60 subunit beta 4, chloroplastic	[O]	Posttranslational modification, protein turnover, chaperones	TCP-1/cpn60 chaperonin family;; TCP-1/cpn60 chaperonin family	Chaperonin 60 subunit beta 4, chloroplastic OS=Arabidopsis thaliana OX=3702 GN=CPN60B4 PE=1 SV=1	O	Posttranslational modification, protein turnover, chaperones	hypothetical protein TSUD_242430 [Trifolium subterraneum]	molecular function: binding (GO:0005488);; cellular component: cell (GO:0005623);; cellular component: cell part (GO:0044464);; biological process: cellular process (GO:0009987)	RNA degradation (ko03018)
Medtr4g122180.JCVIMt4.0v1	c35758.graph_c0	287.67	13.83	21.67	0.99	1.14e-43	up	3.46413	--	--	--	--	--	--	--	--	--	--	--	--	--
Medtr8g096900.JCVIMt4.0v1	c37672.graph_c0	2991.67	171.75	262.33	14.99	3.72e-201	up	3.45903	--	--	--	--	--	--	Thaumatin family	Thaumatin-like protein OS=Actinidia deliciosa OX=3627 GN=tlp PE=1 SV=2	S	Function unknown	pathogenesis-related thaumatin family protein [Medicago truncatula]	--	--
Medtr5g036260.JCVIMt4.0v1	c47323.graph_c0	486	14.49	38	1.16	6.15e-52	up	3.41653	--	--	Cellular Component: Golgi membrane (GO:0000139);; Molecular Function: structural molecule activity (GO:0005198);; Biological Process: intracellular protein transport (GO:0006886);; Cellular Component: integral component of membrane (GO:0016021);; Biological Process: vesicle-mediated transport (GO:0016192);; Cellular Component: COPI vesicle coat (GO:0030126);;	--	[U]	Intracellular trafficking, secretion, and vesicular transport	--	Coatomer subunit beta-1 OS=Arabidopsis thaliana OX=3702 GN=At4g31480 PE=3 SV=2	U	Intracellular trafficking, secretion, and vesicular transport	transmembrane protein, putative [Medicago truncatula]	cellular component: cell (GO:0005623);; cellular component: membrane (GO:0016020);; cellular component: organelle (GO:0043226);; cellular component: organelle part (GO:0044422);; cellular component: cell part (GO:0044464);; molecular function: structural molecule activity (GO:0005198);; biological process: localization (GO:0051179);; cellular component: membrane part (GO:0044425);; cellular compo…	--
Medtr5g082130.JCVIMt4.0v1	c50102.graph_c0	95.33	3.17	6	0.2	7.47e-22	up	3.32266	[O]	Posttranslational modification, protein turnover, chaperones	--	--	--	--	--	--	S	Function unknown	hypothetical protein MTR_5g082130 [Medicago truncatula]	--	--
Medtr5g025750.JCVIMt4.0v1	c36791.graph_c0	248.67	13.5	21.33	1.14	3.34e-46	up	3.32223	[S]	Function unknown	Cellular Component: chloroplast envelope (GO:0009941);; Cellular Component: integral component of membrane (GO:0016021);;	--	--	--	Uncharacterized protein family, UPF0114	--	S	Function unknown	transmembrane protein, putative [Medicago truncatula]	cellular component: cell (GO:0005623);; cellular component: organelle (GO:0043226);; cellular component: organelle part (GO:0044422);; cellular component: cell part (GO:0044464);; cellular component: membrane (GO:0016020);; cellular component: membrane part (GO:0044425)	--
Medtr2g095060.JCVIMt4.0v1	c37840.graph_c0	420	26.93	38.33	2.38	1.71e-63	up	3.31949	--	--	--	--	--	--	--	Kiwellin OS=Actinidia deliciosa OX=3627 PE=1 SV=1	S	Function unknown	Ripening related protein family [Medicago truncatula]	--	--
Medtr7g076310.JCVIMt4.0v1	c30445.graph_c1	1332.67	54.79	132	5.4	9.85e-154	up	3.29158	--	--	Biological Process: carbohydrate transport (GO:0008643);; Cellular Component: integral component of Golgi membrane (GO:0030173);; Cellular Component: integral component of endoplasmic reticulum membrane (GO:0030176);; Molecular Function: 3'-phosphoadenosine 5'-phosphosulfate transmembrane transporter activity (GO:0046964);; Biological Process: 3'-phospho-5'-adenylyl sulfate transmembrane transpor…	K15277|0|mtr:MTR_7g076310|K15277 solute carrier family 35 (adenosine 3'-phospho 5'-phosphosulfate transporter), member B3 | (RefSeq) UDP-galactose transporter 1	[G]	Carbohydrate transport and metabolism	UAA transporter family;; EamA-like transporter family	UDP-galactose/UDP-glucose transporter 2 OS=Arabidopsis thaliana OX=3702 GN=UTR2 PE=2 SV=1	EG	--	UDP-galactose transporter 1 [Medicago truncatula]	biological process: single-organism process (GO:0044699);; biological process: localization (GO:0051179);; cellular component: cell (GO:0005623);; cellular component: membrane (GO:0016020);; cellular component: organelle (GO:0043226);; cellular component: organelle part (GO:0044422);; cellular component: membrane part (GO:0044425);; cellular component: cell part (GO:0044464);; molecular function:…	--
Medtr3g089970.JCVIMt4.0v1	c53412.graph_c0	4421.33	178.1	442.67	17.97	2.55e-133	up	3.29066	[R]	General function prediction only	Molecular Function: alcohol dehydrogenase (NAD) activity (GO:0004022);; Molecular Function: prephenate dehydrogenase (NADP+) activity (GO:0004665);; Cellular Component: cytoplasm (GO:0005737);; Biological Process: tyrosine biosynthetic process (GO:0006571);; Molecular Function: zinc ion binding (GO:0008270);; Molecular Function: prephenate dehydrogenase (NAD+) activity (GO:0008977);; Molecular Fu…	K18857|0|mtr:MTR_3g089940|K18857 alcohol dehydrogenase class-P [EC:1.1.1.1] | (RefSeq) zinc-binding alcohol dehydrogenase family protein	[Q]	Secondary metabolites biosynthesis, transport and catabolism	Zinc-binding dehydrogenase;; Alcohol dehydrogenase GroES-like domain	Alcohol dehydrogenase 1 OS=Trifolium repens OX=3899 GN=ADH1 PE=2 SV=1	C	Energy production and conversion	zinc-binding alcohol dehydrogenase family protein [Medicago truncatula]	biological process: metabolic process (GO:0008152);; biological process: single-organism process (GO:0044699);; molecular function: catalytic activity (GO:0003824);; cellular component: cell (GO:0005623);; cellular component: cell part (GO:0044464);; biological process: cellular process (GO:0009987);; molecular function: binding (GO:0005488)	Glycolysis / Gluconeogenesis (ko00010);; Fatty acid degradation (ko00071);; Tyrosine metabolism (ko00350);; alpha-Linolenic acid metabolism (ko00592)
Medtr4g076470.JCVIMt4.0v1	c47408.graph_c0	20410.7	1262.64	1521.67	98.02	6.09e-23	up	3.2143	--	--	Molecular Function: glucan exo-1,3-beta-glucosidase activity (GO:0004338);; Biological Process: carbohydrate metabolic process (GO:0005975);; Molecular Function: polysaccharide binding (GO:0030247);; Molecular Function: glucan endo-1,3-beta-D-glucosidase activity (GO:0042973);; Cellular Component: anchored component of plasma membrane (GO:0046658);;	--	--	--	Glycosyl hydrolases family 17	Glucan endo-1,3-beta-glucosidase, acidic isoform GI9 OS=Nicotiana tabacum OX=4097 GN=PR2 PE=1 SV=1	G	Carbohydrate transport and metabolism	glucan endo-1,3-beta-glucosidase [Medicago truncatula]	molecular function: catalytic activity (GO:0003824);; biological process: metabolic process (GO:0008152);; molecular function: binding (GO:0005488);; cellular component: cell (GO:0005623);; cellular component: membrane (GO:0016020);; cellular component: membrane part (GO:0044425);; cellular component: cell part (GO:0044464)	--
Medtr5g085810.JCVIMt4.0v1	c49381.graph_c0	172.33	3.61	12.67	0.68	2.81e-23	up	3.20563	[T]	Signal transduction mechanisms	Cellular Component: integral component of membrane (GO:0016021);; Biological Process: regulation of defense response (GO:0031347);; Biological Process: regulation of salicylic acid mediated signaling pathway (GO:2000031);;	--	[R]	General function prediction only	Domain of unknown function;; Ankyrin repeats (3 copies);; Ankyrin repeats (many copies);; Ankyrin repeats (many copies);; Ankyrin repeat;; Ankyrin repeat	Protein LYK5 OS=Arabidopsis thaliana OX=3702 GN=LYK5 PE=2 SV=1	S	Function unknown	ankyrin repeat protein [Medicago truncatula]	cellular component: membrane (GO:0016020);; cellular component: membrane part (GO:0044425);; biological process: biological regulation (GO:0065007)	--
Medtr3g089970.JCVIMt4.0v1	c40522.graph_c0	32.33	3.65	0.33	0.03	1.82e-11	up	3.15153	--	--	--	--	--	--	--	--	--	--	--	--	--
--	c43542.graph_c0	37.33	6.5	1	0.09	6.31e-12	up	3.11617	--	--	--	--	--	--	--	--	--	--	--	--	--
Medtr7g078810.JCVIMt4.0v1	c36079.graph_c0	60	2.18	2	0.07	2.66e-12	up	3.11059	--	--	--	--	[R]	General function prediction only	zinc-binding in reverse transcriptase	Putative ribonuclease H protein At1g65750 OS=Arabidopsis thaliana OX=3702 GN=At1g65750 PE=3 SV=1	L	Replication, recombination and repair	Polynucleotidyl transferase, Ribonuclease H fold [Medicago truncatula]	--	--
Medtr8g077180.JCVIMt4.0v1	c51029.graph_c0	227.33	9.85	23	0.71	5.35e-41	up	3.10939	[CP]	Energy production and conversion ;; Inorganic ion transport and metabolism	Molecular Function: magnesium ion binding (GO:0000287);; Molecular Function: inorganic diphosphatase activity (GO:0004427);; Cellular Component: cytoplasm (GO:0005737);; Biological Process: phosphate-containing compound metabolic process (GO:0006796);;	K01507|1.53204e-27|mtr:MTR_8g077180|K01507 inorganic pyrophosphatase [EC:3.6.1.1] | (RefSeq) soluble inorganic pyrophosphatase	[C]	Energy production and conversion	--	Soluble inorganic pyrophosphatase 3 OS=Arabidopsis thaliana OX=3702 GN=PPA3 PE=2 SV=1	C	Energy production and conversion	soluble inorganic pyrophosphatase-like protein, partial [Trifolium pratense]	molecular function: binding (GO:0005488);; molecular function: catalytic activity (GO:0003824);; cellular component: cell (GO:0005623);; cellular component: cell part (GO:0044464);; biological process: metabolic process (GO:0008152);; biological process: cellular process (GO:0009987)	Oxidative phosphorylation (ko00190)
Medtr5g092080.JCVIMt4.0v1	c36177.graph_c0	877.33	45.29	101.67	5.16	6.4e-117	up	3.06384	--	--	Biological Process: response to oxidative stress (GO:0006979);; Cellular Component: chloroplast thylakoid membrane (GO:0009535);; Cellular Component: thylakoid lumen (GO:0031977);;	--	[M]	Cell wall/membrane/envelope biogenesis	Lipocalin-like domain;; Lipocalin / cytosolic fatty-acid binding protein family	Chloroplastic lipocalin OS=Arabidopsis thaliana OX=3702 GN=CHL PE=1 SV=1	M	Cell wall/membrane/envelope biogenesis	lipocalin-like domain protein [Medicago truncatula]	biological process: response to stimulus (GO:0050896);; cellular component: cell (GO:0005623);; cellular component: membrane (GO:0016020);; cellular component: organelle (GO:0043226);; cellular component: organelle part (GO:0044422);; cellular component: cell part (GO:0044464)	--
--	c43739.graph_c0	88.33	34.41	6.33	2.8	8.95e-17	up	3.05593	--	--	Molecular Function: metal ion binding (GO:0046872);; Molecular Function: dioxygenase activity (GO:0051213);; Biological Process: oxidation-reduction process (GO:0055114);;	--	[QR]	--	--	Codeine O-demethylase OS=Papaver somniferum OX=3469 GN=CODM PE=1 SV=1	S	Function unknown	unknown [Medicago truncatula]	molecular function: binding (GO:0005488);; biological process: metabolic process (GO:0008152);; biological process: single-organism process (GO:0044699);; molecular function: catalytic activity (GO:0003824)	--
Medtr5g081480.JCVIMt4.0v1	c35519.graph_c0	41	1.41	1.67	0.06	4.82e-12	up	3.03312	--	--	--	--	--	--	--	--	S	Function unknown	hypothetical protein MTR_7g090610 [Medicago truncatula]	--	--
Medtr2g010600.JCVIMt4.0v1	c36839.graph_c0	17620.3	1338.45	1221.67	100.8	1.15e-14	up	3.0153	[S]	Function unknown	Cellular Component: extracellular region (GO:0005576);;	K13449|2.72334e-103|mtr:MTR_2g010600|K13449 pathogenesis-related protein 1 | (RefSeq) CAP, cysteine-rich secretory protein, antigen 5	[S]	Function unknown	Cysteine-rich secretory protein family	Pathogenesis-related protein 1 OS=Arabidopsis thaliana OX=3702 GN=PRB1 PE=2 SV=1	S	Function unknown	CAP, cysteine-rich secretory protein, antigen 5 [Medicago truncatula]	cellular component: extracellular region (GO:0005576)	Plant hormone signal transduction (ko04075);; Plant-pathogen interaction (ko04626)
Medtr4g092020.JCVIMt4.0v1	c45508.graph_c0	38.67	1.02	1.33	0.04	2.73e-11	up	3.01096	--	--	Molecular Function: magnesium ion binding (GO:0000287);; Biological Process: metabolic process (GO:0008152);; Molecular Function: terpene synthase activity (GO:0010333);;	K15086|0|mtr:MTR_4g092020|K15086 (3S)-linalool synthase [EC:4.2.3.25] | (RefSeq) (3S)-linalool/(E)-nerolidol/(E,E)-geranyl linalool synthase	--	--	Terpene synthase family, metal binding domain;; Terpene synthase, N-terminal domain	(3S,6E)-nerolidol synthase 1 OS=Fragaria ananassa OX=3747 PE=1 SV=1	S	Function unknown	(3S)-linalool/(E)-nerolidol/(E,E)-geranyl linalool synthase [Medicago truncatula]	molecular function: binding (GO:0005488);; biological process: metabolic process (GO:0008152);; molecular function: catalytic activity (GO:0003824)	Monoterpenoid biosynthesis (ko00902)
Medtr7g093870.JCVIMt4.0v1	c38140.graph_c1	32.67	2.61	0.67	0.05	1.2e-10	up	3.00366	--	--	Biological Process: phenylpropanoid biosynthetic process (GO:0009699);; Molecular Function: guiding stereospecific synthesis activity (GO:0042349);; Biological Process: regulation of catalytic activity (GO:0050790);;	--	--	--	Dirigent-like protein	Dirigent protein 15 OS=Arabidopsis thaliana OX=3702 GN=DIR15 PE=3 SV=1	--	--	disease resistance-responsive, dirigent domain protein [Medicago truncatula]	biological process: metabolic process (GO:0008152);; biological process: cellular process (GO:0009987);; biological process: single-organism process (GO:0044699);; biological process: biological regulation (GO:0065007);; molecular function: molecular function regulator (GO:0098772)	--
Medtr2g033980.JCVIMt4.0v1	c30685.graph_c0	50.67	37.74	2.67	1.9	1.56e-12	up	3.0017	--	--	--	--	--	--	--	--	--	--	--	--	--
Medtr6g034870.JCVIMt4.0v1	c17704.graph_c0	4679.67	2258.99	565	286.48	6.03e-132	up	2.99372	--	--	--	--	--	--	Extensin-like region	--	--	--	--	--	--
--	c44230.graph_c0	35.33	1.9	1	0.06	7.72e-11	up	2.98499	--	--	--	--	--	--	--	--	--	--	--	--	--
Medtr1g102570.JCVIMt4.0v1	c45680.graph_c0	10578	947.62	1333.67	112.62	1.36e-168	up	2.97484	--	--	Cellular Component: integral component of membrane (GO:0016021);; Cellular Component: chloroplast membrane (GO:0031969);;	--	--	--	Chlorophyll A-B binding protein	Early light-induced protein, chloroplastic OS=Pisum sativum OX=3888 PE=2 SV=1	S	Function unknown	early light-induced-like protein [Medicago truncatula]	cellular component: membrane (GO:0016020);; cellular component: membrane part (GO:0044425);; cellular component: cell (GO:0005623);; cellular component: organelle (GO:0043226);; cellular component: organelle part (GO:0044422);; cellular component: cell part (GO:0044464)	--
Medtr4g094775.JCVIMt4.0v1	c34127.graph_c3	26.33	5.56	0	0	7.33e-10	up	2.97374	--	--	Molecular Function: iron ion binding (GO:0005506);; Cellular Component: integral component of membrane (GO:0016021);; Molecular Function: heme binding (GO:0020037);; Molecular Function: isoflavone 2'-hydroxylase activity (GO:0033773);; Biological Process: indole glucosinolate metabolic process (GO:0042343);; Biological Process: secondary metabolite biosynthetic process (GO:0044550);; Biological P…	K13260|8.22326e-29|gmx:100784650|K13260 isoflavone 2'-hydroxylase [EC:1.14.13.89] | (RefSeq) isoflavone 2'-hydroxylase-like	[Q]	Secondary metabolites biosynthesis, transport and catabolism	Cytochrome P450	Isoflavone 2&apos;-hydroxylase OS=Medicago truncatula OX=3880 GN=CYP81E7 PE=1 SV=1	Q	Secondary metabolites biosynthesis, transport and catabolism	isoflavone-2&apos;-hydroxylase [Astragalus mongholicus]	molecular function: binding (GO:0005488);; cellular component: membrane (GO:0016020);; cellular component: membrane part (GO:0044425);; biological process: metabolic process (GO:0008152);; biological process: single-organism process (GO:0044699);; molecular function: catalytic activity (GO:0003824);; biological process: cellular process (GO:0009987);; biological process: response to stimulus (GO:…	Isoflavonoid biosynthesis (ko00943)
Medtr7g009930.JCVIMt4.0v1	c44329.graph_c0	202	10.55	21.67	1.17	3.9e-30	up	2.94259	[G]	Carbohydrate transport and metabolism	Molecular Function: aldose 1-epimerase activity (GO:0004034);; Biological Process: hexose metabolic process (GO:0019318);; Molecular Function: carbohydrate binding (GO:0030246);;	K01785|0|mtr:MTR_7g009930|K01785 aldose 1-epimerase [EC:5.1.3.3] | (RefSeq) aldose 1-epimerase family protein	[G]	Carbohydrate transport and metabolism	Aldose 1-epimerase	--	G	Carbohydrate transport and metabolism	aldose 1-epimerase family protein [Medicago truncatula]	molecular function: catalytic activity (GO:0003824);; biological process: metabolic process (GO:0008152);; biological process: single-organism process (GO:0044699);; molecular function: binding (GO:0005488)	Glycolysis / Gluconeogenesis (ko00010);; Galactose metabolism (ko00052)
Medtr5g013640.JCVIMt4.0v1	c49699.graph_c0	767	31.38	95	6.08	7.53e-89	up	2.93594	[G]	Carbohydrate transport and metabolism	Biological Process: polysaccharide catabolic process (GO:0000272);; Molecular Function: beta-amylase activity (GO:0016161);;	K01177|0|mtr:MTR_5g013640|K01177 beta-amylase [EC:3.2.1.2] | (RefSeq) beta-amylase	--	--	Glycosyl hydrolase family 14	Beta-amylase 3, chloroplastic OS=Arabidopsis thaliana OX=3702 GN=BAM3 PE=1 SV=3	S	Function unknown	beta-amylase [Medicago truncatula]	biological process: metabolic process (GO:0008152);; molecular function: catalytic activity (GO:0003824)	Starch and sucrose metabolism (ko00500)
Medtr6g466000.JCVIMt4.0v1	c51631.graph_c0	218.67	17.07	24.67	1.94	2.22e-35	up	2.93249	--	--	Molecular Function: DNA binding (GO:0003677);; Molecular Function: transcription factor activity, sequence-specific DNA binding (GO:0003700);; Cellular Component: nucleus (GO:0005634);; Biological Process: regulation of transcription, DNA-templated (GO:0006355);; Cellular Component: integral component of membrane (GO:0016021);;	--	--	--	AP2 domain	Dehydration-responsive element-binding protein 1D OS=Arabidopsis thaliana OX=3702 GN=DREB1D PE=2 SV=1	K	Transcription	putative DRE-binding protein DREB1 [Medicago sativa]	molecular function: binding (GO:0005488);; biological process: biological regulation (GO:0065007);; molecular function: nucleic acid binding transcription factor activity (GO:0001071);; cellular component: cell (GO:0005623);; cellular component: organelle (GO:0043226);; cellular component: cell part (GO:0044464);; cellular component: membrane (GO:0016020);; cellular component: membrane part (GO:0…	--
Medtr7g015340.JCVIMt4.0v1	c53733.graph_c0	276.33	58.24	32.33	6.64	5.2e-38	up	2.9246	--	--	--	--	--	--	--	--	--	--	RALF [Medicago truncatula]	--	--
Medtr3g025260.JCVIMt4.0v1	c40989.graph_c0	220.33	7.87	26	0.84	9.31e-32	up	2.8966	[QV]	Secondary metabolites biosynthesis, transport and catabolism ;; Defense mechanisms	Molecular Function: iron ion binding (GO:0005506);; Cellular Component: integral component of membrane (GO:0016021);; Molecular Function: flavonoid 3'-monooxygenase activity (GO:0016711);; Molecular Function: heme binding (GO:0020037);; Biological Process: secondary metabolite biosynthetic process (GO:0044550);; Biological Process: oxidation-reduction process (GO:0055114);;	K05280|0|mtr:MTR_3g025260|K05280 flavonoid 3'-monooxygenase [EC:1.14.13.21] | (RefSeq) flavonoid hydroxylase	[Q]	Secondary metabolites biosynthesis, transport and catabolism	Cytochrome P450	Flavonoid 3&apos;-monooxygenase OS=Petunia hybrida OX=4102 GN=CYP75B2 PE=2 SV=1	Q	Secondary metabolites biosynthesis, transport and catabolism	flavonoid hydroxylase [Medicago truncatula]	molecular function: binding (GO:0005488);; cellular component: membrane (GO:0016020);; cellular component: membrane part (GO:0044425);; biological process: metabolic process (GO:0008152);; biological process: single-organism process (GO:0044699);; molecular function: catalytic activity (GO:0003824)	Flavonoid biosynthesis (ko00941);; Flavone and flavonol biosynthesis (ko00944)
Medtr8g074903.JCVIMt4.0v1	c49750.graph_c2	101.67	5.71	9.67	0.54	4.37e-18	up	2.88883	--	--	--	--	--	--	--	--	--	--	--	--	--
--	c42799.graph_c0	125.33	3.69	12.67	0.41	1.45e-20	up	2.8788	--	--	--	--	--	--	--	--	--	--	--	--	--
Medtr3g462340.JCVIMt4.0v1	c46301.graph_c1	9809.33	170.89	1333.67	23.1	0	up	2.87428	[G]	Carbohydrate transport and metabolism	Cellular Component: cytosol (GO:0005829);; Biological Process: glycogen catabolic process (GO:0005980);; Molecular Function: glycogen phosphorylase activity (GO:0008184);; Biological Process: response to water deprivation (GO:0009414);; Cellular Component: chloroplast (GO:0009507);; Molecular Function: pyridoxal phosphate binding (GO:0030170);;	K00688|0|mtr:MTR_3g462340|K00688 glycogen phosphorylase [EC:2.4.1.1] | (RefSeq) glycogen/starch/alpha-glucan phosphorylase family protein	[G]	Carbohydrate transport and metabolism	Carbohydrate phosphorylase	Alpha-glucan phosphorylase, H isozyme OS=Vicia faba OX=3906 PE=2 SV=1	G	Carbohydrate transport and metabolism	glycogen/starch/alpha-glucan phosphorylase family protein [Medicago truncatula]	cellular component: cell (GO:0005623);; cellular component: cell part (GO:0044464);; biological process: metabolic process (GO:0008152);; biological process: cellular process (GO:0009987);; biological process: single-organism process (GO:0044699);; molecular function: catalytic activity (GO:0003824);; biological process: response to stimulus (GO:0050896);; cellular component: organelle (GO:004322…	Starch and sucrose metabolism (ko00500)
Medtr4g124160.JCVIMt4.0v1	c37792.graph_c0	51.33	1.82	3.67	0.12	4.4e-12	up	2.85325	--	--	--	--	--	--	--	--	S	Function unknown	hypothetical protein MTR_4g124160 [Medicago truncatula]	--	--
Medtr1g062590.JCVIMt4.0v1	c45324.graph_c1	15032.3	888.29	399.33	25.13	3.66e-09	up	2.85297	--	--	Molecular Function: 2-amino-4-hydroxy-6-hydroxymethyldihydropteridine diphosphokinase activity (GO:0003848);; Molecular Function: dihydroneopterin aldolase activity (GO:0004150);;	--	--	--	Thaumatin family	Thaumatin-like protein 1a OS=Malus domestica OX=3750 GN=TL1 PE=1 SV=1	S	Function unknown	allergen Pru protein, putative [Medicago truncatula]	molecular function: catalytic activity (GO:0003824)	--
Medtr7g116520.JCVIMt4.0v1	c34797.graph_c0	195.67	9.17	21.33	0.98	1.02e-18	up	2.82074	[IR]	Lipid transport and metabolism ;; General function prediction only	Cellular Component: integral component of membrane (GO:0016021);; Molecular Function: hydrolase activity, acting on ester bonds (GO:0016788);; Molecular Function: 9,9'-dicis-carotene:quinone oxidoreductase activity (GO:0052886);; Molecular Function: 7,9,9'-tricis-neurosporene:quinone oxidoreductase activity (GO:0052887);; Biological Process: 9,9'-di-cis-zeta-carotene desaturation to 7,9,7',9'-tet…	--	--	--	GDSL-like Lipase/Acylhydrolase	GDSL esterase/lipase At5g33370 OS=Arabidopsis thaliana OX=3702 GN=At5g33370 PE=2 SV=1	S	Function unknown	GDSL-like lipase/acylhydrolase [Medicago truncatula]	cellular component: membrane (GO:0016020);; cellular component: membrane part (GO:0044425);; molecular function: catalytic activity (GO:0003824);; biological process: metabolic process (GO:0008152);; biological process: single-organism process (GO:0044699);; biological process: cellular process (GO:0009987)	--
Medtr4g019790.JCVIMt4.0v1	c41024.graph_c0	310.67	21.03	40.67	2.73	2.1e-46	up	2.81513	[O]	Posttranslational modification, protein turnover, chaperones	Molecular Function: glutathione transferase activity (GO:0004364);; Cellular Component: cytoplasm (GO:0005737);; Biological Process: glutathione metabolic process (GO:0006749);; Biological Process: toxin catabolic process (GO:0009407);;	K00799|5.21115e-158|mtr:MTR_4g019790|K00799 glutathione S-transferase [EC:2.5.1.18] | (RefSeq) glutathione S-transferase, amino-terminal domain protein	[O]	Posttranslational modification, protein turnover, chaperones	Glutathione S-transferase, N-terminal domain;; Glutathione S-transferase, N-terminal domain;; Glutathione S-transferase, C-terminal domain;; Glutathione S-transferase, N-terminal domain;; Glutathione S-transferase, C-terminal domain;; Glutathione S-transferase, C-terminal domain	Probable glutathione S-transferase OS=Glycine max OX=3847 GN=HSP26-A PE=2 SV=1	O	Posttranslational modification, protein turnover, chaperones	glutathione S-transferase, amino-terminal domain protein [Medicago truncatula]	molecular function: catalytic activity (GO:0003824);; cellular component: cell (GO:0005623);; cellular component: cell part (GO:0044464);; biological process: metabolic process (GO:0008152);; biological process: cellular process (GO:0009987);; biological process: single-organism process (GO:0044699);; biological process: response to stimulus (GO:0050896);; biological process: detoxification (GO:0…	Glutathione metabolism (ko00480)
Medtr3g005060.JCVIMt4.0v1	c42259.graph_c0	1374.67	76.46	193	10.87	3.45e-138	up	2.81283	[Q]	Secondary metabolites biosynthesis, transport and catabolism	Molecular Function: carboxymethylenebutenolidase activity (GO:0008806);;	K01061|0|mtr:MTR_3g005060|K01061 carboxymethylenebutenolidase [EC:3.1.1.45] | (RefSeq) dienelactone hydrolase family protein	[R]	General function prediction only	Dienelactone hydrolase family;; Prolyl oligopeptidase family;; Serine hydrolase (FSH1)	Endo-1,3;1,4-beta-D-glucanase OS=Zea mays OX=4577 PE=1 SV=1	Q	Secondary metabolites biosynthesis, transport and catabolism	dienelactone hydrolase family protein [Medicago truncatula]	molecular function: catalytic activity (GO:0003824)	--
Medtr4g131380.JCVIMt4.0v1	c35208.graph_c0	124.33	2.69	14	0.3	4.74e-19	up	2.79923	[S]	Function unknown	Biological Process: lipid metabolic process (GO:0006629);; Molecular Function: glycerophosphodiester phosphodiesterase activity (GO:0008889);; Cellular Component: integral component of membrane (GO:0016021);;	--	[C]	Energy production and conversion	Glycerophosphoryl diester phosphodiesterase family	Glycerophosphodiester phosphodiesterase GDPDL6 OS=Arabidopsis thaliana OX=3702 GN=GDPDL6 PE=2 SV=1	C	Energy production and conversion	glycerophosphoryl diester phosphodiesterase family protein [Medicago truncatula]	biological process: metabolic process (GO:0008152);; biological process: single-organism process (GO:0044699);; molecular function: catalytic activity (GO:0003824);; cellular component: membrane (GO:0016020);; cellular component: membrane part (GO:0044425)	--
Medtr4g123950.JCVIMt4.0v1	c37379.graph_c0	277	20.56	34.67	2.59	1.77e-29	up	2.79844	--	--	--	--	[S]	Function unknown	--	--	S	Function unknown	group 3 LEA protein [Medicago sativa]	--	--
Medtr2g089130.JCVIMt4.0v1	c44762.graph_c0	35.33	1.46	1.67	0.04	6.51e-10	up	2.79591	--	--	Molecular Function: magnesium ion binding (GO:0000287);; Biological Process: metabolic process (GO:0008152);; Molecular Function: isoprene synthase activity (GO:0034009);;	--	--	--	Terpene synthase family, metal binding domain;; Terpene synthase, N-terminal domain	Probable terpene synthase 11 OS=Ricinus communis OX=3988 GN=TPS11 PE=3 SV=1	O	Posttranslational modification, protein turnover, chaperones	sesquiterpene synthase [Medicago truncatula]	molecular function: binding (GO:0005488);; biological process: metabolic process (GO:0008152);; molecular function: catalytic activity (GO:0003824)	--
--	c36862.graph_c0	36	1.16	2	0.06	3.21e-10	up	2.78915	--	--	--	--	--	--	--	--	--	--	--	--	--
Medtr1g068650.JCVIMt4.0v1	c48068.graph_c0	87.67	2.96	9.33	1.21	2.69e-17	up	2.78674	--	--	--	--	--	--	--	--	--	--	--	--	--
Medtr4g015120.JCVIMt4.0v1	c49938.graph_c0	996	31.63	141	4.27	9.79e-78	up	2.78191	[DPM]	Cell cycle control, cell division, chromosome partitioning ;; Inorganic ion transport and metabolism ;; Cell wall/membrane/envelope biogenesis	Molecular Function: copper ion binding (GO:0005507);; Biological Process: lignin biosynthetic process (GO:0009809);; Molecular Function: oxidoreductase activity, oxidizing metal ions (GO:0016722);; Biological Process: lignin catabolic process (GO:0046274);; Cellular Component: apoplast (GO:0048046);; Molecular Function: hydroquinone:oxygen oxidoreductase activity (GO:0052716);; Biological Process…	K05909|0|mtr:MTR_4g015120|K05909 laccase [EC:1.10.3.2] | (RefSeq) laccase/diphenol oxidase family protein	[Q]	Secondary metabolites biosynthesis, transport and catabolism	Multicopper oxidase;; Multicopper oxidase;; Multicopper oxidase	Laccase-4 OS=Arabidopsis thaliana OX=3702 GN=IRX12 PE=2 SV=2	Q	Secondary metabolites biosynthesis, transport and catabolism	laccase/diphenol oxidase family protein [Medicago truncatula]	molecular function: binding (GO:0005488);; biological process: metabolic process (GO:0008152);; biological process: cellular process (GO:0009987);; biological process: single-organism process (GO:0044699);; molecular function: catalytic activity (GO:0003824);; cellular component: extracellular region (GO:0005576)	--
Medtr6g034870.JCVIMt4.0v1	c32440.graph_c0	16239	2826.38	2105.33	395.85	8.16e-36	up	2.76948	--	--	--	--	--	--	Extensin-like region	--	--	--	hypothetical protein KK1_003131 [Cajanus cajan]	--	--
--	c48666.graph_c0	72.33	2.41	6.67	0.23	3.4e-13	up	2.74321	--	--	--	--	--	--	--	--	--	--	--	--	--
Medtr7g024873.JCVIMt4.0v1	c49357.graph_c0	186.33	14.54	23.33	1.79	2.17e-24	up	2.73878	--	--	Molecular Function: calcium ion binding (GO:0005509);;	--	--	--	EF-hand domain pair;; EF hand;; EF hand;; EF-hand domain	--	S	Function unknown	calcium-binding EF-hand protein [Medicago truncatula]	molecular function: binding (GO:0005488)	--
Medtr2g072020.JCVIMt4.0v1	c9400.graph_c0	30.33	5.19	1	0.19	6.44e-09	up	2.73567	--	--	--	--	--	--	--	--	--	--	--	--	--
Medtr4g019640.JCVIMt4.0v1	c36570.graph_c0	223	17.43	30	2.26	9.28e-32	up	2.72644	--	--	Biological Process: response to stress (GO:0006950);; Cellular Component: integral component of membrane (GO:0016021);;	--	--	--	--	--	S	Function unknown	hypothetical protein MTR_4g019640 [Medicago truncatula]	biological process: response to stimulus (GO:0050896);; cellular component: membrane (GO:0016020);; cellular component: membrane part (GO:0044425)	--
Medtr7g112360.JCVIMt4.0v1	c32873.graph_c0	302.33	21.41	42	2.9	2.23e-40	up	2.71375	[O]	Posttranslational modification, protein turnover, chaperones	--	--	[O]	Posttranslational modification, protein turnover, chaperones	DnaJ domain	Chaperone protein dnaJ 72 OS=Arabidopsis thaliana OX=3702 GN=ATJ72 PE=2 SV=1	O	Posttranslational modification, protein turnover, chaperones	chaperone DnaJ domain protein [Medicago truncatula]	--	--
--	c43459.graph_c0	108	4.92	12.67	0.59	1.34e-18	up	2.70998	--	--	--	--	--	--	--	--	--	--	--	--	--
Medtr4g101760.JCVIMt4.0v1	c20498.graph_c0	52	4.17	4.33	0.35	3.01e-11	up	2.70073	--	--	Molecular Function: enzyme inhibitor activity (GO:0004857);; Cellular Component: integral component of membrane (GO:0016021);; Biological Process: negative regulation of catalytic activity (GO:0043086);;	--	--	--	Plant invertase/pectin methylesterase inhibitor	21 kDa protein OS=Daucus carota OX=4039 PE=2 SV=1	S	Function unknown	plant invertase/pectin methylesterase inhibitor [Medicago truncatula]	biological process: biological regulation (GO:0065007);; molecular function: molecular function regulator (GO:0098772);; cellular component: membrane (GO:0016020);; cellular component: membrane part (GO:0044425)	--
Medtr5g020980.JCVIMt4.0v1	c38482.graph_c0	247	7.49	31.67	0.98	1.88e-24	up	2.69422	[MDT]	Cell wall/membrane/envelope biogenesis ;; Cell cycle control, cell division, chromosome partitioning ;; Signal transduction mechanisms	Molecular Function: ATP binding (GO:0005524);; Molecular Function: hydrolase activity (GO:0016787);;	--	[O]	Posttranslational modification, protein turnover, chaperones	Domain associated at C-terminal with AAA;; ATPase family associated with various cellular activities (AAA);; Holliday junction DNA helicase ruvB N-terminus	AAA-ATPase At5g17760 OS=Arabidopsis thaliana OX=3702 GN=At5g17760 PE=3 SV=1	O	Posttranslational modification, protein turnover, chaperones	P-loop nucleoside triphosphate hydrolase superfamily protein [Medicago truncatula]	molecular function: binding (GO:0005488);; molecular function: catalytic activity (GO:0003824)	--
Medtr4g104540.JCVIMt4.0v1	c34171.graph_c0	53	1.89	4	0.14	1.56e-10	up	2.69326	[QV]	Secondary metabolites biosynthesis, transport and catabolism ;; Defense mechanisms	Molecular Function: monooxygenase activity (GO:0004497);; Molecular Function: iron ion binding (GO:0005506);; Cellular Component: membrane (GO:0016020);; Molecular Function: oxidoreductase activity, acting on paired donors, with incorporation or reduction of molecular oxygen (GO:0016705);; Molecular Function: heme binding (GO:0020037);; Biological Process: oxidation-reduction process (GO:0055114)…	--	[Q]	Secondary metabolites biosynthesis, transport and catabolism	Cytochrome P450	Cytochrome P450 71A25 OS=Arabidopsis thaliana OX=3702 GN=CYP71A25 PE=2 SV=1	Q	Secondary metabolites biosynthesis, transport and catabolism	cytochrome P450 family 71 protein [Medicago truncatula]	biological process: metabolic process (GO:0008152);; biological process: single-organism process (GO:0044699);; molecular function: catalytic activity (GO:0003824);; molecular function: binding (GO:0005488);; cellular component: membrane (GO:0016020)	--
Medtr6g023460.JCVIMt4.0v1	c35174.graph_c0	118.67	9.17	14.33	1.13	1.51e-18	up	2.68496	[T]	Signal transduction mechanisms	Molecular Function: calcium ion binding (GO:0005509);;	K13448|4.61269e-70|mtr:MTR_6g023460|K13448 calcium-binding protein CML | (RefSeq) EF hand calcium-binding family protein	[T]	Signal transduction mechanisms	EF-hand domain pair;; EF-hand domain pair;; EF hand;; EF-hand domain;; EF hand	Putative calcium-binding protein CML19 OS=Oryza sativa subsp. japonica OX=39947 GN=CML19 PE=3 SV=1	DTZ	--	EF hand calcium-binding family protein [Medicago truncatula]	molecular function: binding (GO:0005488)	Plant-pathogen interaction (ko04626)
Medtr4g070190.JCVIMt4.0v1	c49552.graph_c0	68	12.63	7	1.27	4.08e-13	up	2.67904	--	--	--	--	--	--	--	--	--	--	--	--	--
Medtr4g064530.JCVIMt4.0v1	c44661.graph_c0	251.67	6.52	35	0.9	1.12e-28	up	2.6661	[DPM]	Cell cycle control, cell division, chromosome partitioning ;; Inorganic ion transport and metabolism ;; Cell wall/membrane/envelope biogenesis	Molecular Function: copper ion binding (GO:0005507);; Biological Process: lignin biosynthetic process (GO:0009809);; Cellular Component: integral component of membrane (GO:0016021);; Molecular Function: oxidoreductase activity, oxidizing metal ions (GO:0016722);; Biological Process: lignin catabolic process (GO:0046274);; Cellular Component: apoplast (GO:0048046);; Molecular Function: hydroquinon…	K05909|0|mtr:MTR_4g064530|K05909 laccase [EC:1.10.3.2] | (RefSeq) laccase/diphenol oxidase family protein	[Q]	Secondary metabolites biosynthesis, transport and catabolism	Multicopper oxidase;; Multicopper oxidase;; Multicopper oxidase	Laccase-2 OS=Arabidopsis thaliana OX=3702 GN=LAC2 PE=2 SV=1	Q	Secondary metabolites biosynthesis, transport and catabolism	laccase/diphenol oxidase family protein [Medicago truncatula]	molecular function: binding (GO:0005488);; biological process: metabolic process (GO:0008152);; biological process: cellular process (GO:0009987);; biological process: single-organism process (GO:0044699);; cellular component: membrane (GO:0016020);; cellular component: membrane part (GO:0044425);; molecular function: catalytic activity (GO:0003824);; cellular component: extracellular region (GO:…	--
Medtr2g437880.JCVIMt4.0v1	c47538.graph_c0	1747	54.18	258.33	8.12	1.51e-72	up	2.66523	[QV]	Secondary metabolites biosynthesis, transport and catabolism ;; Defense mechanisms	Molecular Function: iron ion binding (GO:0005506);; Cellular Component: endoplasmic reticulum membrane (GO:0005789);; Cellular Component: integral component of membrane (GO:0016021);; Molecular Function: heme binding (GO:0020037);; Biological Process: indole glucosinolate metabolic process (GO:0042343);; Biological Process: secondary metabolite biosynthetic process (GO:0044550);; Molecular Functi…	--	[Q]	Secondary metabolites biosynthesis, transport and catabolism	Cytochrome P450	Isoflavone 3&apos;-hydroxylase (Fragment) OS=Medicago truncatula OX=3880 GN=CYP81E9 PE=1 SV=1	Q	Secondary metabolites biosynthesis, transport and catabolism	RecName: Full=Isoflavone 3&apos;-hydroxylase; AltName: Full=Cytochrome P450 81E9	molecular function: binding (GO:0005488);; cellular component: cell (GO:0005623);; cellular component: membrane (GO:0016020);; cellular component: organelle (GO:0043226);; cellular component: organelle part (GO:0044422);; cellular component: membrane part (GO:0044425);; cellular component: cell part (GO:0044464);; biological process: metabolic process (GO:0008152);; biological process: cellular p…	--
Medtr3g479470.JCVIMt4.0v1	c50244.graph_c0	2589.67	78.29	407	11.7	3.25e-83	up	2.65124	--	--	Biological Process: flavonoid biosynthetic process (GO:0009813);; Cellular Component: intracellular membrane-bounded organelle (GO:0043231);; Biological Process: flavonoid glucuronidation (GO:0052696);; Molecular Function: quercetin 3-O-glucosyltransferase activity (GO:0080043);; Molecular Function: quercetin 7-O-glucosyltransferase activity (GO:0080044);;	--	[GC]	--	UDP-glucoronosyl and UDP-glucosyl transferase	Linamarin synthase 2 OS=Manihot esculenta OX=3983 GN=UGT85K5 PE=1 SV=1	S	Function unknown	UDP-glucosyltransferase family protein [Medicago truncatula]	biological process: metabolic process (GO:0008152);; cellular component: cell (GO:0005623);; cellular component: organelle (GO:0043226);; cellular component: cell part (GO:0044464);; biological process: cellular process (GO:0009987);; biological process: single-organism process (GO:0044699);; molecular function: catalytic activity (GO:0003824)	--
Medtr4g068790.JCVIMt4.0v1	c43578.graph_c0	221.67	7.86	31.67	1.05	4.79e-24	up	2.64582	--	--	Cellular Component: intracellular (GO:0005622);; Biological Process: intracellular signal transduction (GO:0035556);;	--	--	--	C1 domain;; Zinc finger, ZZ type	--	S	Function unknown	cysteine/histidine-rich C1 domain protein [Medicago truncatula]	cellular component: cell (GO:0005623);; cellular component: cell part (GO:0044464);; biological process: cellular process (GO:0009987);; biological process: signaling (GO:0023052);; biological process: single-organism process (GO:0044699);; biological process: response to stimulus (GO:0050896);; biological process: biological regulation (GO:0065007)	--
Medtr2g014050.JCVIMt4.0v1	c17666.graph_c0	54309.7	2307.27	199	7.88	1.03e-07	up	2.64268	--	--	--	--	--	--	--	--	S	Function unknown	late embryogenesis abundant domain protein [Medicago truncatula]	--	--
--	c51684.graph_c2	37.33	3.25	2.33	0.2	3.77e-09	up	2.63936	--	--	--	--	--	--	--	--	--	--	--	--	--
Medtr6g065270.JCVIMt4.0v1	c34059.graph_c1	108	12.61	12.33	1.55	1.76e-14	up	2.61501	[I]	Lipid transport and metabolism	Biological Process: metabolic process (GO:0008152);; Molecular Function: hydrolase activity (GO:0016787);;	--	[V]	Defense mechanisms	alpha/beta hydrolase fold;; Carboxylesterase family;; Chlorophyllase enzyme;; Steryl acetyl hydrolase	Probable carboxylesterase 18 OS=Arabidopsis thaliana OX=3702 GN=CXE18 PE=1 SV=1	I	Lipid transport and metabolism	carboxylesterase-like protein [Medicago truncatula]	biological process: metabolic process (GO:0008152);; molecular function: catalytic activity (GO:0003824)	--
Medtr0197s0010.JCVIMt4.0v1	c41942.graph_c0	53.33	3.01	5.33	0.31	2.58e-11	up	2.60487	--	--	Molecular Function: DNA binding (GO:0003677);;	K09422|2.35189e-163|mtr:MTR_0197s0010|K09422 myb proto-oncogene protein, plant | (RefSeq) myb transcription factor	[K]	Transcription	Myb-like DNA-binding domain;; Myb-like DNA-binding domain	Transcription factor MYB113 OS=Arabidopsis thaliana OX=3702 GN=MYB113 PE=1 SV=1	K	Transcription	myb transcription factor [Medicago truncatula]	molecular function: binding (GO:0005488)	--
Medtr6g033675.JCVIMt4.0v1	c40779.graph_c0	1714.33	115.81	280.33	18.61	1.4e-146	up	2.60136	--	--	Biological Process: flavonoid biosynthetic process (GO:0009813);; Cellular Component: intracellular membrane-bounded organelle (GO:0043231);; Biological Process: flavonoid glucuronidation (GO:0052696);; Molecular Function: quercetin 3-O-glucosyltransferase activity (GO:0080043);; Molecular Function: quercetin 7-O-glucosyltransferase activity (GO:0080044);;	--	[GC]	--	--	UDP-glycosyltransferase 1 OS=Pueraria montana var. lobata OX=3893 GN=UGT1 PE=1 SV=1	S	Function unknown	UDP-glucosyl transferase 88A1 [Medicago truncatula]	biological process: metabolic process (GO:0008152);; cellular component: cell (GO:0005623);; cellular component: organelle (GO:0043226);; cellular component: cell part (GO:0044464);; biological process: cellular process (GO:0009987);; biological process: single-organism process (GO:0044699);; molecular function: catalytic activity (GO:0003824)	--
--	c37712.graph_c0	42.67	3	3.33	0.24	2.58e-09	up	2.58126	--	--	--	--	--	--	--	--	--	--	--	--	--
--	c35281.graph_c0	48.67	2.64	4.67	0.25	2e-10	up	2.57928	--	--	--	--	--	--	--	--	--	--	--	--	--
Medtr7g061690.JCVIMt4.0v1	c33265.graph_c0	42.67	4.02	3	0.26	8.44e-09	up	2.578	--	--	--	--	--	--	--	--	--	--	--	--	--
Medtr3g067720.JCVIMt4.0v1	c40920.graph_c0	113.67	19.23	15.33	2.64	4.7e-17	up	2.55988	--	--	Cellular Component: integral component of membrane (GO:0016021);;	--	--	--	--	--	S	Function unknown	PREDICTED: uncharacterized protein LOC108217736 [Daucus carota subsp. sativus]	cellular component: membrane (GO:0016020);; cellular component: membrane part (GO:0044425)	--
Medtr4g101820.JCVIMt4.0v1	c52894.graph_c0	941	45.79	158.67	7.7	1.1e-75	up	2.54553	[P]	Inorganic ion transport and metabolism	Molecular Function: superoxide dismutase activity (GO:0004784);; Molecular Function: zinc ion binding (GO:0008270);; Cellular Component: chloroplast stroma (GO:0009570);; Molecular Function: superoxide dismutase copper chaperone activity (GO:0016532);; Biological Process: removal of superoxide radicals (GO:0019430);; Biological Process: metal ion transport (GO:0030001);; Biological Process: posit…	K04569|0|mtr:MTR_4g101820|K04569 copper chaperone for superoxide dismutase | (RefSeq) Cu/Zn-superoxide dismutase copper chaperone	[P]	Inorganic ion transport and metabolism	Copper/zinc superoxide dismutase (SODC);; Heavy-metal-associated domain	Copper chaperone for superoxide dismutase, chloroplastic/cytosolic OS=Arabidopsis thaliana OX=3702 GN=CCS PE=1 SV=1	S	Function unknown	Cu/Zn-superoxide dismutase copper chaperone [Medicago truncatula]	biological process: metabolic process (GO:0008152);; biological process: cellular process (GO:0009987);; biological process: single-organism process (GO:0044699);; biological process: response to stimulus (GO:0050896);; biological process: detoxification (GO:0098754);; molecular function: catalytic activity (GO:0003824);; molecular function: antioxidant activity (GO:0016209);; molecular function:…	--
Medtr3g115600.JCVIMt4.0v1	c32216.graph_c0	65.33	3.76	6	0.45	9.71e-10	up	2.53393	[C]	Energy production and conversion	Molecular Function: NADPH dehydrogenase activity (GO:0003959);; Cellular Component: intracellular (GO:0005622);; Molecular Function: FMN binding (GO:0010181);; Biological Process: oxidation-reduction process (GO:0055114);;	K05894|2.17494e-173|gmx:100810271|K05894 12-oxophytodienoic acid reductase [EC:1.3.1.42] | (RefSeq) putative 12-oxophytodienoate reductase 11	[CR]	--	NADH:flavin oxidoreductase / NADH oxidase family	Putative 12-oxophytodienoate reductase 11 OS=Oryza sativa subsp. japonica OX=39947 GN=OPR11 PE=2 SV=1	C	Energy production and conversion	12-oxophytodienoate reductase-like protein [Trifolium pratense]	biological process: metabolic process (GO:0008152);; biological process: single-organism process (GO:0044699);; molecular function: catalytic activity (GO:0003824);; cellular component: cell (GO:0005623);; cellular component: cell part (GO:0044464);; molecular function: binding (GO:0005488)	alpha-Linolenic acid metabolism (ko00592)
Medtr4g015460.JCVIMt4.0v1	c44083.graph_c0	175.67	5.02	24	0.8	5.63e-17	up	2.52556	[G]	Carbohydrate transport and metabolism	Biological Process: carbohydrate metabolic process (GO:0005975);; Molecular Function: beta-glucosidase activity (GO:0008422);; Biological Process: response to salt stress (GO:0009651);; Biological Process: response to hormone (GO:0009725);; Cellular Component: membrane (GO:0016020);; Biological Process: glucosinolate catabolic process (GO:0019762);;	K01188|0|mtr:MTR_4g015460|K01188 beta-glucosidase [EC:3.2.1.21] | (RefSeq) glycoside hydrolase family 1 protein	[G]	Carbohydrate transport and metabolism	Glycosyl hydrolase family 1	Beta-glucosidase 24 OS=Oryza sativa subsp. japonica OX=39947 GN=BGLU24 PE=2 SV=1	G	Carbohydrate transport and metabolism	glycoside hydrolase family 1 protein [Medicago truncatula]	biological process: metabolic process (GO:0008152);; molecular function: catalytic activity (GO:0003824);; biological process: response to stimulus (GO:0050896);; cellular component: membrane (GO:0016020);; biological process: cellular process (GO:0009987);; biological process: single-organism process (GO:0044699)	Cyanoamino acid metabolism (ko00460);; Starch and sucrose metabolism (ko00500);; Phenylpropanoid biosynthesis (ko00940)
Medtr3g016290.JCVIMt4.0v1	c40810.graph_c0	3855.33	835.48	530.67	121.39	4.87e-16	up	2.50848	--	--	--	--	--	--	--	--	--	--	--	--	--
Medtr3g092780.JCVIMt4.0v1	c49680.graph_c0	3701	82.9	636.33	14.22	1.37e-127	up	2.50201	[TK]	Signal transduction mechanisms ;; Transcription	Biological Process: phosphorelay signal transduction system (GO:0000160);; Cellular Component: intracellular (GO:0005622);;	K12130|0|mtr:MTR_3g092780|K12130 pseudo-response regulator 5 | (RefSeq) PRR response regulator	[K]	Transcription	Response regulator receiver domain;; CCT motif	Two-component response regulator-like PRR95 OS=Oryza sativa subsp. japonica OX=39947 GN=PRR95 PE=2 SV=1	K	Transcription	PRR response regulator [Medicago truncatula]	biological process: cellular process (GO:0009987);; biological process: signaling (GO:0023052);; biological process: single-organism process (GO:0044699);; biological process: response to stimulus (GO:0050896);; biological process: biological regulation (GO:0065007);; cellular component: cell (GO:0005623);; cellular component: cell part (GO:0044464)	Circadian rhythm - plant (ko04712)
Medtr0115s0020.JCVIMt4.0v1	c41798.graph_c0	145.33	8.04	22.33	1.21	1.42e-20	up	2.49777	--	--	Molecular Function: ubiquitin-protein transferase activity (GO:0004842);; Biological Process: protein ubiquitination (GO:0016567);; Cellular Component: SCF ubiquitin ligase complex (GO:0019005);; Biological Process: SCF-dependent proteasomal ubiquitin-dependent protein catabolic process (GO:0031146);;	--	--	--	F-box domain;; F-box-like	F-box/kelch-repeat protein At3g06240 OS=Arabidopsis thaliana OX=3702 GN=At3g06240 PE=2 SV=1	S	Function unknown	F-box protein interaction domain protein [Medicago truncatula]	biological process: metabolic process (GO:0008152);; biological process: cellular process (GO:0009987);; molecular function: catalytic activity (GO:0003824);; cellular component: cell (GO:0005623);; cellular component: macromolecular complex (GO:0032991);; cellular component: cell part (GO:0044464)	--
Medtr3g060650.JCVIMt4.0v1	c24588.graph_c0	502	57.5	85.33	9.68	3.19e-48	up	2.49616	--	--	--	--	--	--	--	--	--	--	--	--	--
Medtr2g078780.JCVIMt4.0v1	c27331.graph_c0	195	11.95	30.67	1.8	8.25e-25	up	2.48445	--	--	--	--	--	--	--	--	--	--	chilling-induced protein, putative [Medicago truncatula]	--	--
Medtr7g083450.JCVIMt4.0v1	c41179.graph_c0	25.33	1.34	1.33	0.25	1.79e-07	up	2.47783	--	--	--	--	--	--	--	--	--	--	--	--	--
Medtr3g107090.JCVIMt4.0v1	c39578.graph_c3	62.67	3.06	6	0.28	3.36e-09	up	2.47658	--	--	--	--	--	--	--	--	S	Function unknown	hypothetical protein MTR_3g107090 [Medicago truncatula]	--	--
Medtr6g023340.JCVIMt4.0v1	c37034.graph_c0	1660	96.17	242.67	14.42	6.31e-18	up	2.46946	--	--	Molecular Function: chitinase activity (GO:0004568);; Cellular Component: extracellular region (GO:0005576);; Biological Process: carbohydrate metabolic process (GO:0005975);; Biological Process: chitin catabolic process (GO:0006032);; Molecular Function: chitin binding (GO:0008061);;	K01183|0|mtr:MTR_6g023340|K01183 chitinase [EC:3.2.1.14] | (RefSeq) chitinase	[M]	Cell wall/membrane/envelope biogenesis	Glycosyl hydrolases family 18	Basic endochitinase OS=Nicotiana tabacum OX=4097 PE=2 SV=1	G	Carbohydrate transport and metabolism	chitinase class III-1 [Medicago sativa]	molecular function: catalytic activity (GO:0003824);; cellular component: extracellular region (GO:0005576);; biological process: metabolic process (GO:0008152);; molecular function: binding (GO:0005488)	Amino sugar and nucleotide sugar metabolism (ko00520)
Medtr8g037933.JCVIMt4.0v1	c39031.graph_c0	3351.67	509.4	582.67	88.85	1.64e-63	up	2.46909	--	--	--	--	--	--	--	--	--	--	hypothetical protein MtrDRAFT_AC153123g45v2 [Medicago truncatula]	--	--
Medtr3g064700.JCVIMt4.0v1	c35400.graph_c0	25.67	2.32	1.33	0.12	3.02e-07	up	2.44998	[O]	Posttranslational modification, protein turnover, chaperones	Molecular Function: glutathione transferase activity (GO:0004364);; Cellular Component: cytoplasm (GO:0005737);; Biological Process: glutathione metabolic process (GO:0006749);;	K00799|1.2049e-153|mtr:MTR_3g064700|K00799 glutathione S-transferase [EC:2.5.1.18] | (RefSeq) glutathione S-transferase, amino-terminal domain protein	[O]	Posttranslational modification, protein turnover, chaperones	Glutathione S-transferase, N-terminal domain;; Glutathione S-transferase, C-terminal domain;; Glutathione S-transferase, N-terminal domain;; Glutathione S-transferase, N-terminal domain;; Glutathione S-transferase, C-terminal domain;; Glutathione S-transferase, C-terminal domain	Glutathione S-transferase F11 OS=Arabidopsis thaliana OX=3702 GN=GSTF11 PE=2 SV=1	O	Posttranslational modification, protein turnover, chaperones	glutathione S-transferase, amino-terminal domain protein [Medicago truncatula]	molecular function: catalytic activity (GO:0003824);; cellular component: cell (GO:0005623);; cellular component: cell part (GO:0044464);; biological process: metabolic process (GO:0008152);; biological process: cellular process (GO:0009987)	Glutathione metabolism (ko00480)
Medtr3g099150.JCVIMt4.0v1	c37726.graph_c0	383	9.93	65.33	1.7	7.8e-36	up	2.44647	--	--	Cellular Component: integral component of membrane (GO:0016021);;	--	--	--	Nodulin-like	Protein NUCLEAR FUSION DEFECTIVE 4 OS=Arabidopsis thaliana OX=3702 GN=NFD4 PE=3 SV=1	S	Function unknown	nodulin-like/MFS transporter [Medicago truncatula]	cellular component: membrane (GO:0016020);; cellular component: membrane part (GO:0044425)	--
Medtr4g016590.JCVIMt4.0v1	c31819.graph_c0	22.67	2.52	1	0.12	5.32e-07	up	2.42355	--	--	Molecular Function: nucleic acid binding (GO:0003676);; Biological Process: DNA integration (GO:0015074);; Molecular Function: transferase activity (GO:0016740);;	--	[R]	General function prediction only	gag-polypeptide of LTR copia-type	--	L	Replication, recombination and repair	integrase catalytic region [Trifolium pratense]	molecular function: binding (GO:0005488);; biological process: metabolic process (GO:0008152);; biological process: cellular process (GO:0009987);; molecular function: catalytic activity (GO:0003824)	--
Medtr8g069760.JCVIMt4.0v1	c53526.graph_c0	12742.3	137.34	2372.67	25.11	2.77e-248	up	2.42187	[G]	Carbohydrate transport and metabolism	Molecular Function: ATP binding (GO:0005524);; Cellular Component: mitochondrion (GO:0005739);; Biological Process: starch catabolic process (GO:0005983);; Cellular Component: chloroplast stroma (GO:0009570);; Biological Process: cold acclimation (GO:0009631);; Cellular Component: chloroplast envelope (GO:0009941);; Biological Process: phosphorylation (GO:0016310);; Molecular Function: alpha-gluc…	K08244|0|mtr:MTR_8g069760|K08244 alpha-glucan, water dikinase [EC:2.7.9.4] | (RefSeq) alpha-glucan water dikinase	--	--	Pyruvate phosphate dikinase, PEP/pyruvate binding domain	Alpha-glucan water dikinase, chloroplastic OS=Citrus reticulata OX=85571 GN=R1 PE=2 SV=1	S	Function unknown	alpha-glucan water dikinase [Medicago truncatula]	molecular function: binding (GO:0005488);; cellular component: cell (GO:0005623);; cellular component: organelle (GO:0043226);; cellular component: cell part (GO:0044464);; biological process: metabolic process (GO:0008152);; biological process: cellular process (GO:0009987);; cellular component: organelle part (GO:0044422);; biological process: response to stimulus (GO:0050896);; molecular funct…	--
--	c50066.graph_c0	339.67	27.27	61.33	4.83	2.75e-38	up	2.3917	--	--	--	--	--	--	--	--	--	--	--	--	--
Medtr1g074410.JCVIMt4.0v1	c34528.graph_c0	117	9.42	18.67	1.51	4.31e-16	up	2.38571	--	--	Cellular Component: integral component of membrane (GO:0016021);;	--	--	--	--	--	--	--	hypothetical protein VIGAN_01091200 [Vigna angularis var. angularis]	cellular component: membrane (GO:0016020);; cellular component: membrane part (GO:0044425)	--
Medtr5g019350.JCVIMt4.0v1	c48345.graph_c0	331.67	9.97	58	1.77	6.62e-27	up	2.36047	--	--	Molecular Function: uniporter activity (GO:0015292);; Cellular Component: integral component of membrane (GO:0016021);; Biological Process: transmembrane transport (GO:0055085);;	K20858|2.98861e-105|mtr:MTR_5g019350|K20858 calcium uniporter protein, mitochondrial | (RefSeq) PPR containing plant-like protein	[R]	General function prediction only	Mitochondrial calcium uniporter	Calcium uniporter protein 2, mitochondrial OS=Arabidopsis thaliana OX=3702 GN=At2g23790 PE=2 SV=1	S	Function unknown	PPR containing plant-like protein [Medicago truncatula]	biological process: localization (GO:0051179);; molecular function: transporter activity (GO:0005215);; cellular component: membrane (GO:0016020);; cellular component: membrane part (GO:0044425)	--
Medtr4g119640.JCVIMt4.0v1	c54326.graph_c0	24	0.78	1.33	0.05	9.3e-07	up	2.35659	--	--	Molecular Function: DNA binding (GO:0003677);;	--	--	--	--	--	S	Function unknown	hypothetical protein MTR_4g119640 [Medicago truncatula]	molecular function: binding (GO:0005488)	--
--	c26893.graph_c0	63.33	4.67	9	0.64	5.29e-11	up	2.35585	--	--	--	--	--	--	--	--	--	--	--	--	--
Medtr0036s0070.JCVIMt4.0v1	c42999.graph_c0	2871.33	107.67	555.67	20.5	2.95e-134	up	2.35582	--	--	Molecular Function: aspartic-type endopeptidase activity (GO:0004190);; Biological Process: proteolysis (GO:0006508);; Biological Process: protein catabolic process (GO:0030163);;	--	[O]	Posttranslational modification, protein turnover, chaperones	Xylanase inhibitor N-terminal;; Eukaryotic aspartyl protease;; Xylanase inhibitor C-terminal	Aspartic proteinase CDR1 OS=Arabidopsis thaliana OX=3702 GN=CDR1 PE=1 SV=1	O	Posttranslational modification, protein turnover, chaperones	eukaryotic aspartyl protease family protein [Medicago truncatula]	biological process: metabolic process (GO:0008152);; molecular function: catalytic activity (GO:0003824)	--
Medtr7g108260.JCVIMt4.0v1	c28144.graph_c0	32.67	2.87	3	0.26	1.77e-07	up	2.35436	[O]	Posttranslational modification, protein turnover, chaperones	Cellular Component: cell (GO:0005623);; Molecular Function: electron carrier activity (GO:0009055);; Molecular Function: protein disulfide oxidoreductase activity (GO:0015035);; Biological Process: cell redox homeostasis (GO:0045454);; Biological Process: oxidation-reduction process (GO:0055114);;	K03676|2.02583e-54|mtr:MTR_7g108260|K03676 glutaredoxin 3 | (RefSeq) monothiol glutaredoxin-S2 protein	[O]	Posttranslational modification, protein turnover, chaperones	Glutaredoxin	Monothiol glutaredoxin-S6 OS=Arabidopsis thaliana OX=3702 GN=GRXS6 PE=3 SV=1	O	Posttranslational modification, protein turnover, chaperones	monothiol glutaredoxin-S2 protein [Medicago truncatula]	cellular component: cell (GO:0005623);; molecular function: electron carrier activity (GO:0009055);; biological process: metabolic process (GO:0008152);; biological process: single-organism process (GO:0044699);; molecular function: catalytic activity (GO:0003824);; biological process: cellular process (GO:0009987);; biological process: biological regulation (GO:0065007)	--
Medtr3g082130.JCVIMt4.0v1	c51486.graph_c0	257	5.12	46	0.94	3.38e-29	up	2.35251	[K]	Transcription	Cellular Component: integral component of membrane (GO:0016021);; Molecular Function: kinase activity (GO:0016301);; Biological Process: phosphorylation (GO:0016310);;	--	[R]	General function prediction only	Leucine rich repeat;; Leucine Rich repeats (2 copies);; Leucine rich repeat N-terminal domain	Receptor-like protein EIX2 OS=Solanum lycopersicum OX=4081 GN=EIX2 PE=1 SV=2	S	Function unknown	receptor-like protein [Medicago truncatula]	cellular component: membrane (GO:0016020);; cellular component: membrane part (GO:0044425);; biological process: metabolic process (GO:0008152);; biological process: cellular process (GO:0009987);; molecular function: catalytic activity (GO:0003824)	--
Medtr8g031400.JCVIMt4.0v1	c39563.graph_c0	1487	60.22	222	9.23	4.92e-13	up	2.34848	[IR]	Lipid transport and metabolism ;; General function prediction only	Molecular Function: lipase activity (GO:0016298);; Molecular Function: 9,9'-dicis-carotene:quinone oxidoreductase activity (GO:0052886);; Molecular Function: 7,9,9'-tricis-neurosporene:quinone oxidoreductase activity (GO:0052887);; Biological Process: 9,9'-di-cis-zeta-carotene desaturation to 7,9,7',9'-tetra-cis-lycopene (GO:0052889);; Biological Process: oxidation-reduction process (GO:0055114);;	--	--	--	GDSL-like Lipase/Acylhydrolase	GDSL esterase/lipase 5 OS=Arabidopsis thaliana OX=3702 GN=GLIP5 PE=2 SV=2	S	Function unknown	GDSL-like lipase/acylhydrolase [Medicago truncatula]	molecular function: catalytic activity (GO:0003824);; biological process: metabolic process (GO:0008152);; biological process: single-organism process (GO:0044699);; biological process: cellular process (GO:0009987)	--
Medtr4g116610.JCVIMt4.0v1	c38894.graph_c0	59.33	5.35	5.67	0.52	1.34e-07	up	2.34357	--	--	--	--	--	--	--	--	S	Function unknown	hypothetical protein MTR_4g116610 [Medicago truncatula]	--	--
--	c34323.graph_c0	31.33	2.6	3	0.3	1.73e-07	up	2.34133	--	--	--	--	--	--	--	--	--	--	--	--	--
Medtr1g107295.JCVIMt4.0v1	c46302.graph_c0	1396	34.44	272.67	6.73	6.29e-78	up	2.33972	[QV]	Secondary metabolites biosynthesis, transport and catabolism ;; Defense mechanisms	Molecular Function: iron ion binding (GO:0005506);; Cellular Component: integral component of membrane (GO:0016021);; Molecular Function: flavonoid 3'-monooxygenase activity (GO:0016711);; Molecular Function: heme binding (GO:0020037);; Molecular Function: flavone synthase activity (GO:0033759);; Biological Process: secondary metabolite biosynthetic process (GO:0044550);; Biological Process: flav…	--	[Q]	Secondary metabolites biosynthesis, transport and catabolism	Cytochrome P450	Licodione synthase OS=Glycyrrhiza echinata OX=46348 GN=CYP93B1 PE=1 SV=2	Q	Secondary metabolites biosynthesis, transport and catabolism	cytochrome P450 family flavone synthase [Medicago truncatula]	molecular function: binding (GO:0005488);; cellular component: membrane (GO:0016020);; cellular component: membrane part (GO:0044425);; biological process: metabolic process (GO:0008152);; biological process: single-organism process (GO:0044699);; molecular function: catalytic activity (GO:0003824)	--
Medtr1g090867.JCVIMt4.0v1	c48103.graph_c0	2631	89.23	515	18.15	6.88e-137	up	2.33433	--	--	Biological Process: starch catabolic process (GO:0005983);; Biological Process: protein dephosphorylation (GO:0006470);; Biological Process: circadian rhythm (GO:0007623);; Molecular Function: protein tyrosine/serine/threonine phosphatase activity (GO:0008138);; Cellular Component: chloroplast stroma (GO:0009570);; Molecular Function: carbohydrate phosphatase activity (GO:0019203);; Molecular Fun…	--	[V]	Defense mechanisms	Glycogen recognition site of AMP-activated protein kinase;; Dual specificity phosphatase, catalytic domain	Phosphoglucan phosphatase DSP4, amyloplastic OS=Castanea sativa OX=21020 GN=DSP4 PE=1 SV=1	T	Signal transduction mechanisms	tyrosine phosphatase [Medicago truncatula]	biological process: metabolic process (GO:0008152);; biological process: cellular process (GO:0009987);; biological process: rhythmic process (GO:0048511);; molecular function: catalytic activity (GO:0003824);; cellular component: cell (GO:0005623);; cellular component: organelle (GO:0043226);; cellular component: organelle part (GO:0044422);; cellular component: cell part (GO:0044464);; molecula…	--
Medtr4g082900.JCVIMt4.0v1	c39716.graph_c0	3770.33	328.19	747.33	63.71	1.99e-118	up	2.33127	--	--	--	--	--	--	--	--	--	--	hypothetical protein MTR_4g082900 [Medicago truncatula]	--	--
Medtr7g024390.JCVIMt4.0v1	c41015.graph_c1	636.33	59.55	123.33	11.6	2.87e-58	up	2.31786	--	--	Molecular Function: ATP binding (GO:0005524);; Molecular Function: 2-alkenal reductase [NAD(P)] activity (GO:0032440);; Biological Process: oxidation-reduction process (GO:0055114);;	K03283|1.53428e-47|mtr:MTR_7g024390|K03283 heat shock 70kDa protein 1/8 | (RefSeq) heat shock cognate 70 kDa protein	[O]	Posttranslational modification, protein turnover, chaperones	Hsp70 protein	Heat shock 70 kDa protein 3 OS=Arabidopsis thaliana OX=3702 GN=HSP70-3 PE=1 SV=1	O	Posttranslational modification, protein turnover, chaperones	heat shock cognate 70 kDa protein [Medicago truncatula]	molecular function: binding (GO:0005488);; biological process: metabolic process (GO:0008152);; biological process: single-organism process (GO:0044699);; molecular function: catalytic activity (GO:0003824)	Spliceosome (ko03040);; Protein processing in endoplasmic reticulum (ko04141);; Endocytosis (ko04144)
Medtr8g069955.JCVIMt4.0v1	c45357.graph_c0	293.33	8.95	55.33	1.64	4.71e-25	up	2.30479	--	--	Cellular Component: trans-Golgi network (GO:0005802);; Cellular Component: plasma membrane (GO:0005886);; Biological Process: phosphate ion transport (GO:0006817);; Molecular Function: inositol monophosphate 1-phosphatase activity (GO:0008934);; Cellular Component: integral component of membrane (GO:0016021);; Biological Process: dephosphorylation (GO:0016311);; Molecular Function: inositol monop…	--	[U]	Intracellular trafficking, secretion, and vesicular transport	SPX domain;; EXS family	Phosphate transporter PHO1 homolog 1 OS=Arabidopsis thaliana OX=3702 GN=PHO1-H1 PE=2 SV=1	T	Signal transduction mechanisms	phosphate transporter PHO1-like protein [Medicago truncatula]	cellular component: cell (GO:0005623);; cellular component: organelle (GO:0043226);; cellular component: organelle part (GO:0044422);; cellular component: cell part (GO:0044464);; cellular component: membrane (GO:0016020);; biological process: localization (GO:0051179);; biological process: metabolic process (GO:0008152);; biological process: cellular process (GO:0009987);; molecular function: ca…	--
--	c25028.graph_c0	23.33	1.78	1.67	0.12	1.33e-06	up	2.30111	--	--	--	--	--	--	--	--	--	--	--	--	--
Medtr7g088330.JCVIMt4.0v1	c47068.graph_c0	117.67	4.19	20	0.69	8.75e-15	up	2.29624	[QV]	Secondary metabolites biosynthesis, transport and catabolism ;; Defense mechanisms	Molecular Function: monooxygenase activity (GO:0004497);; Molecular Function: iron ion binding (GO:0005506);; Cellular Component: integral component of membrane (GO:0016021);; Molecular Function: oxidoreductase activity, acting on paired donors, with incorporation or reduction of molecular oxygen (GO:0016705);; Molecular Function: heme binding (GO:0020037);; Biological Process: oxidation-reductio…	--	[QI]	--	Cytochrome P450	Cytochrome P450 94A1 OS=Vicia sativa OX=3908 GN=CYP94A1 PE=2 SV=2	Q	Secondary metabolites biosynthesis, transport and catabolism	cytochrome P450 family protein [Medicago truncatula]	biological process: metabolic process (GO:0008152);; biological process: single-organism process (GO:0044699);; molecular function: catalytic activity (GO:0003824);; molecular function: binding (GO:0005488);; cellular component: membrane (GO:0016020);; cellular component: membrane part (GO:0044425)	--
Medtr3g083295.JCVIMt4.0v1	c31748.graph_c0	79.33	15.19	13	2.41	2.12e-12	up	2.29274	--	--	Cellular Component: integral component of membrane (GO:0016021);;	--	--	--	--	--	S	Function unknown	transmembrane protein, putative [Medicago truncatula]	cellular component: membrane (GO:0016020);; cellular component: membrane part (GO:0044425)	--
Medtr4g107010.JCVIMt4.0v1	c38580.graph_c0	1477	32.92	213.67	4.87	3.37e-10	up	2.28507	[T]	Signal transduction mechanisms	Molecular Function: ubiquitin-protein transferase activity (GO:0004842);; Cellular Component: nucleus (GO:0005634);; Cellular Component: cytoplasm (GO:0005737);; Biological Process: protein ubiquitination (GO:0016567);;	--	[S]	Function unknown	U-box domain;; Armadillo/beta-catenin-like repeat	U-box domain-containing protein 19 OS=Arabidopsis thaliana OX=3702 GN=PUB19 PE=2 SV=1	S	Function unknown	spotted leaf protein, putative [Medicago truncatula]	biological process: metabolic process (GO:0008152);; biological process: cellular process (GO:0009987);; molecular function: catalytic activity (GO:0003824);; cellular component: cell (GO:0005623);; cellular component: organelle (GO:0043226);; cellular component: cell part (GO:0044464)	--
Medtr5g094220.JCVIMt4.0v1	c45105.graph_c0	1339.33	22.12	261.33	4.23	4.4e-47	up	2.28147	--	--	--	--	[R]	General function prediction only	PPR repeat;; PPR repeat family;; PPR repeat;; Pentatricopeptide repeat domain;; Pentacotripeptide-repeat region of PRORP;; Probable lipid transfer;; Protease inhibitor/seed storage/LTP family	Pentatricopeptide repeat-containing protein At4g39952, mitochondrial OS=Arabidopsis thaliana OX=3702 GN=PCMP-E98 PE=2 SV=2	S	Function unknown	PPR containing plant-like protein [Medicago truncatula]	--	--
Medtr2g063110.JCVIMt4.0v1	c47439.graph_c0	463.33	13.63	93	2.64	1.52e-42	up	2.27753	--	--	Molecular Function: aspartic-type endopeptidase activity (GO:0004190);; Biological Process: carbohydrate metabolic process (GO:0005975);; Biological Process: proteolysis (GO:0006508);; Cellular Component: chloroplast (GO:0009507);; Biological Process: chloroplast-nucleus signaling pathway (GO:0010019);; Biological Process: protein catabolic process (GO:0030163);;	--	[O]	Posttranslational modification, protein turnover, chaperones	Xylanase inhibitor N-terminal;; Xylanase inhibitor C-terminal;; Eukaryotic aspartyl protease	Aspartic proteinase NANA, chloroplast OS=Arabidopsis thaliana OX=3702 GN=NANA PE=1 SV=1	O	Posttranslational modification, protein turnover, chaperones	eukaryotic aspartyl protease family protein [Medicago truncatula]	biological process: metabolic process (GO:0008152);; molecular function: catalytic activity (GO:0003824);; cellular component: cell (GO:0005623);; cellular component: organelle (GO:0043226);; cellular component: cell part (GO:0044464);; biological process: cellular process (GO:0009987);; biological process: signaling (GO:0023052);; biological process: single-organism process (GO:0044699);; biolog…	--
Medtr3g087960.JCVIMt4.0v1	c50022.graph_c1	168	21.65	31.67	2.11	1.24e-19	up	2.27065	--	--	Molecular Function: binding (GO:0005488);; Biological Process: primary metabolic process (GO:0044238);; Biological Process: cellular macromolecule metabolic process (GO:0044260);;	--	[R]	General function prediction only	Reverse transcriptase (RNA-dependent DNA polymerase);; Reverse transcriptase (RNA-dependent DNA polymerase)	Retrovirus-related Pol polyprotein from transposon TNT 1-94 OS=Nicotiana tabacum OX=4097 PE=2 SV=1	L	Replication, recombination and repair	Pol [Coffea eugenioides]	molecular function: binding (GO:0005488);; biological process: metabolic process (GO:0008152);; biological process: cellular process (GO:0009987)	--
Medtr2g087810.JCVIMt4.0v1	c41580.graph_c0	51	4.21	7.33	0.59	4.65e-09	up	2.26387	[R]	General function prediction only	--	--	[MW]	--	Fasciclin domain	Fasciclin-like arabinogalactan protein 16 OS=Arabidopsis thaliana OX=3702 GN=FLA16 PE=2 SV=1	M	Cell wall/membrane/envelope biogenesis	fasciclin-like arabinogalactan protein 16 precursor [Medicago truncatula]	--	--
Medtr3g116670.JCVIMt4.0v1	c43894.graph_c0	75.33	3.84	11.33	0.87	1.85e-10	up	2.26355	--	--	--	--	--	--	--	--	--	--	--	--	--
Medtr5g072780.JCVIMt4.0v1	c41188.graph_c0	43	3.04	5.33	0.37	1.3e-07	up	2.25241	--	--	--	--	[K]	Transcription	CCT motif	Protein CHLOROPLAST IMPORT APPARATUS 2 OS=Arabidopsis thaliana OX=3702 GN=CIA2 PE=1 SV=1	K	Transcription	CCT motif protein [Medicago truncatula]	--	--
Medtr7g114240.JCVIMt4.0v1	c40726.graph_c0	1545	152.46	323.67	30.71	1.46e-72	up	2.2496	[P]	Inorganic ion transport and metabolism	Molecular Function: superoxide dismutase activity (GO:0004784);; Cellular Component: cytoplasm (GO:0005737);; Biological Process: removal of superoxide radicals (GO:0019430);; Molecular Function: metal ion binding (GO:0046872);; Biological Process: oxidation-reduction process (GO:0055114);;	K04565|1.17671e-81|mtr:MTR_7g114240|K04565 superoxide dismutase, Cu-Zn family [EC:1.15.1.1] | (RefSeq) superoxide dismutase [Cu-Zn] protein	[P]	Inorganic ion transport and metabolism	Copper/zinc superoxide dismutase (SODC)	Superoxide dismutase [Cu-Zn] OS=Pisum sativum OX=3888 GN=SODCC PE=2 SV=2	P	Inorganic ion transport and metabolism	superoxide dismutase [Cu-Zn] protein [Medicago truncatula]	biological process: metabolic process (GO:0008152);; biological process: cellular process (GO:0009987);; biological process: single-organism process (GO:0044699);; biological process: response to stimulus (GO:0050896);; biological process: detoxification (GO:0098754);; molecular function: catalytic activity (GO:0003824);; molecular function: antioxidant activity (GO:0016209);; cellular component:…	Peroxisome (ko04146)
Medtr1g070070.JCVIMt4.0v1	c35564.graph_c0	43.33	4.04	6	0.54	2.54e-08	up	2.24876	--	--	Molecular Function: DNA binding (GO:0003677);; Molecular Function: transcription factor activity, sequence-specific DNA binding (GO:0003700);; Cellular Component: nucleus (GO:0005634);; Biological Process: regulation of transcription, DNA-templated (GO:0006355);;	--	--	--	AP2 domain	Ethylene-responsive transcription factor ERF098 OS=Arabidopsis thaliana OX=3702 GN=ERF098 PE=1 SV=1	K	Transcription	AP2 domain class transcription factor [Medicago truncatula]	molecular function: binding (GO:0005488);; biological process: biological regulation (GO:0065007);; molecular function: nucleic acid binding transcription factor activity (GO:0001071);; cellular component: cell (GO:0005623);; cellular component: organelle (GO:0043226);; cellular component: cell part (GO:0044464)	--
Medtr1g087540.JCVIMt4.0v1	c37908.graph_c0	39.67	1.67	5	0.21	1.06e-07	up	2.24783	--	--	Molecular Function: DNA binding (GO:0003677);;	--	[K]	Transcription	Myb-like DNA-binding domain;; Myb-like DNA-binding domain	Transcription factor MYB12 OS=Arabidopsis thaliana OX=3702 GN=MYB12 PE=1 SV=1	K	Transcription	MYB transcription factor MYB112 [Medicago truncatula]	molecular function: binding (GO:0005488)	--
Medtr2g034750.JCVIMt4.0v1	c38317.graph_c0	693.67	44.54	143.33	9.15	4.59e-65	up	2.24602	--	--	Cellular Component: integral component of membrane (GO:0016021);;	--	--	--	cAMP-regulated phosphoprotein/endosulfine conserved region	--	S	Function unknown	cAMP-regulated phosphoprotein-like protein [Medicago truncatula]	cellular component: membrane (GO:0016020);; cellular component: membrane part (GO:0044425)	--
Medtr4g069080.JCVIMt4.0v1	c48897.graph_c0	1371.67	35.41	285.67	7.23	3.4e-94	up	2.24271	[CO]	Energy production and conversion ;; Posttranslational modification, protein turnover, chaperones	Cellular Component: integral component of membrane (GO:0016021);;	K07399|0|mtr:MTR_4g069080|K07399 cytochrome c biogenesis protein | (RefSeq) cytochrome C biogenesis protein Ccs1	--	--	ResB-like family;; ResB-like family	Cytochrome c biogenesis protein CCS1, chloroplastic OS=Arabidopsis thaliana OX=3702 GN=CCS1 PE=1 SV=1	O	Posttranslational modification, protein turnover, chaperones	cytochrome C biogenesis protein Ccs1 [Medicago truncatula]	cellular component: membrane (GO:0016020);; cellular component: membrane part (GO:0044425)	--
Medtr4g126170.JCVIMt4.0v1	c37045.graph_c0	534	36.84	109	7.65	8.26e-46	up	2.23421	--	--	Cellular Component: membrane (GO:0016020);;	--	--	--	Cotton fibre expressed protein;; Domain of unknown function (DUF4408)	--	S	Function unknown	DUF4408 domain protein [Medicago truncatula]	cellular component: membrane (GO:0016020)	--
Medtr7g084300.JCVIMt4.0v1	c35102.graph_c0	4242.33	172.25	894.33	35.44	4.77e-69	up	2.22871	[Q]	Secondary metabolites biosynthesis, transport and catabolism	Cellular Component: nucleus (GO:0005634);; Cellular Component: endoplasmic reticulum (GO:0005783);; Biological Process: response to gravity (GO:0009629);; Cellular Component: plant-type vacuole membrane (GO:0009705);; Biological Process: flavonoid biosynthetic process (GO:0009813);; Biological Process: auxin polar transport (GO:0009926);; Biological Process: response to UV-B (GO:0010224);; Molecu…	K00660|0|mtr:MTR_7g084300|K00660 chalcone synthase [EC:2.3.1.74] | (RefSeq) chalcone and stilbene synthase family protein	--	--	Chalcone and stilbene synthases, N-terminal domain;; Chalcone and stilbene synthases, C-terminal domain;; 3-Oxoacyl-[acyl-carrier-protein (ACP)] synthase III C terminal;; 3-Oxoacyl-[acyl-carrier-protein (ACP)] synthase III;; FAE1/Type III polyketide synthase-like protein	Chalcone synthase OS=Betula pendula OX=3505 GN=CHS PE=2 SV=2	Q	Secondary metabolites biosynthesis, transport and catabolism	chalcone and stilbene synthase family protein [Medicago truncatula]	cellular component: cell (GO:0005623);; cellular component: organelle (GO:0043226);; cellular component: cell part (GO:0044464);; biological process: response to stimulus (GO:0050896);; cellular component: membrane (GO:0016020);; cellular component: organelle part (GO:0044422);; biological process: metabolic process (GO:0008152);; biological process: single-organism process (GO:0044699);; biologi…	Flavonoid biosynthesis (ko00941);; Circadian rhythm - plant (ko04712)
Medtr1g074410.JCVIMt4.0v1	c17736.graph_c0	46	7.94	5.67	1.03	2.82e-07	up	2.21583	--	--	--	--	--	--	--	--	--	--	hypothetical protein VIGAN_01091200 [Vigna angularis var. angularis]	--	--
Medtr5g053940.JCVIMt4.0v1	c48358.graph_c0	634.33	24.05	134.33	5.6	5.88e-61	up	2.20537	[J]	Translation, ribosomal structure and biogenesis	Biological Process: proteolysis (GO:0006508);; Cellular Component: chloroplast (GO:0009507);; Molecular Function: metal ion binding (GO:0046872);; Molecular Function: metalloaminopeptidase activity (GO:0070006);; Biological Process: protein initiator methionine removal (GO:0070084);;	K01265|0|mtr:MTR_5g053940|K01265 methionyl aminopeptidase [EC:3.4.11.18] | (RefSeq) methionine aminopeptidase 1B	[O]	Posttranslational modification, protein turnover, chaperones	Metallopeptidase family M24	Methionine aminopeptidase 1B, chloroplastic OS=Arabidopsis thaliana OX=3702 GN=MAP1B PE=2 SV=2	J	Translation, ribosomal structure and biogenesis	methionine aminopeptidase 1B [Medicago truncatula]	biological process: metabolic process (GO:0008152);; cellular component: cell (GO:0005623);; cellular component: organelle (GO:0043226);; cellular component: cell part (GO:0044464);; molecular function: binding (GO:0005488);; molecular function: catalytic activity (GO:0003824);; biological process: cellular process (GO:0009987)	--
--	c45892.graph_c0	85	4.55	14.33	1.34	3.94e-11	up	2.2013	--	--	--	--	--	--	--	--	--	--	--	--	--
Medtr8g069955.JCVIMt4.0v1	c45357.graph_c1	122.33	8.83	23.33	1.66	5.29e-16	up	2.19257	--	--	Cellular Component: trans-Golgi network (GO:0005802);; Cellular Component: plasma membrane (GO:0005886);; Biological Process: phosphate ion transport (GO:0006817);; Molecular Function: inositol monophosphate 1-phosphatase activity (GO:0008934);; Cellular Component: integral component of membrane (GO:0016021);; Biological Process: dephosphorylation (GO:0016311);; Molecular Function: inositol monop…	--	[U]	Intracellular trafficking, secretion, and vesicular transport	EXS family	Phosphate transporter PHO1 homolog 1 OS=Arabidopsis thaliana OX=3702 GN=PHO1-H1 PE=2 SV=1	T	Signal transduction mechanisms	phosphate transporter PHO1-like protein [Medicago truncatula]	cellular component: cell (GO:0005623);; cellular component: organelle (GO:0043226);; cellular component: organelle part (GO:0044422);; cellular component: cell part (GO:0044464);; cellular component: membrane (GO:0016020);; biological process: localization (GO:0051179);; biological process: metabolic process (GO:0008152);; biological process: cellular process (GO:0009987);; molecular function: ca…	--
Medtr7g104330.JCVIMt4.0v1	c43601.graph_c0	227.67	7.56	25	0.85	1.34e-06	up	2.19195	[T]	Signal transduction mechanisms	Molecular Function: acid phosphatase activity (GO:0003993);; Cellular Component: integral component of membrane (GO:0016021);; Biological Process: dephosphorylation (GO:0016311);; Molecular Function: metal ion binding (GO:0046872);;	--	[G]	Carbohydrate transport and metabolism	Calcineurin-like phosphoesterase;; Purple acid Phosphatase, N-terminal domain;; Iron/zinc purple acid phosphatase-like protein C	Purple acid phosphatase 22 OS=Arabidopsis thaliana OX=3702 GN=PAP22 PE=2 SV=1	S	Function unknown	purple acid phosphatase superfamily protein [Medicago truncatula]	biological process: metabolic process (GO:0008152);; biological process: cellular process (GO:0009987);; molecular function: catalytic activity (GO:0003824);; cellular component: membrane (GO:0016020);; cellular component: membrane part (GO:0044425);; molecular function: binding (GO:0005488)	--
Medtr3g103190.JCVIMt4.0v1	c42654.graph_c0	429.67	18.34	90.33	3.85	2.9e-36	up	2.17261	--	--	Cellular Component: integral component of membrane (GO:0016021);;	--	--	--	--	--	S	Function unknown	transmembrane protein, putative [Medicago truncatula]	cellular component: membrane (GO:0016020);; cellular component: membrane part (GO:0044425)	--
Medtr1g069750.JCVIMt4.0v1	c42354.graph_c0	731.67	36.88	159	7.93	1.96e-60	up	2.1675	[V]	Defense mechanisms	Molecular Function: ATP binding (GO:0005524);; Molecular Function: ATPase activity (GO:0016887);;	K12608|0|mtr:MTR_1g069750|K12608 CCR4-NOT complex subunit CAF16 | (RefSeq) ABC transporter family I protein, SmABCI protein	[RK]	--	ABC transporter;; AAA domain, putative AbiEii toxin, Type IV TA system	ABC transporter I family member 19 OS=Arabidopsis thaliana OX=3702 GN=ABCI19 PE=2 SV=1	S	Function unknown	ABC transporter family I protein, SmABCI protein [Medicago truncatula]	molecular function: binding (GO:0005488);; molecular function: catalytic activity (GO:0003824)	RNA degradation (ko03018)
--	c30411.graph_c0	83.33	5.62	14.67	0.98	2.41e-10	up	2.14789	--	--	--	--	--	--	--	--	--	--	--	--	--
--	c39883.graph_c0	569.67	33.15	123.67	7.2	2.18e-44	up	2.14141	--	--	--	--	--	--	--	--	--	--	hypothetical protein L195_g022179 [Trifolium pratense]	--	--
Medtr1g062710.JCVIMt4.0v1	c45788.graph_c0	99	5.29	18.33	0.99	2.25e-11	up	2.13918	[R]	General function prediction only	Molecular Function: glutamate-ammonia ligase activity (GO:0004356);; Biological Process: glutamine biosynthetic process (GO:0006542);; Molecular Function: hydrolase activity (GO:0016787);;	--	[E]	Amino acid transport and metabolism	Amidohydrolase	--	S	Function unknown	nodulin/glutamate-ammonia ligase-like protein [Medicago truncatula]	molecular function: catalytic activity (GO:0003824);; biological process: metabolic process (GO:0008152);; biological process: cellular process (GO:0009987);; biological process: single-organism process (GO:0044699)	--
Medtr5g091100.JCVIMt4.0v1	c43004.graph_c0	137.33	8.9	27.33	1.73	1.92e-14	up	2.13138	--	--	--	--	--	--	--	--	--	--	hypothetical protein MTR_5g091100, partial [Medicago truncatula]	--	--
Medtr7g109560.JCVIMt4.0v1	c36076.graph_c1	62	3.79	10.33	0.61	7.98e-09	up	2.12126	--	--	Biological Process: regulation of gene expression by genetic imprinting (GO:0006349);; Molecular Function: methyltransferase activity (GO:0008168);; Cellular Component: PcG protein complex (GO:0031519);; Biological Process: methylation (GO:0032259);; Molecular Function: sequence-specific DNA binding (GO:0043565);; Biological Process: negative regulation of transcription, DNA-templated (GO:0045892…	K11430|0|mtr:MTR_7g109560|K11430 histone-lysine N-methyltransferase EZH2 [EC:2.1.1.43] | (RefSeq) histone-lysine N-methyltransferase	[K]	Transcription	--	Histone-lysine N-methyltransferase EZA1 OS=Arabidopsis thaliana OX=3702 GN=EZA1 PE=1 SV=1	S	Function unknown	histone-lysine N-methyltransferase [Medicago truncatula]	biological process: metabolic process (GO:0008152);; biological process: cellular process (GO:0009987);; biological process: biological regulation (GO:0065007);; molecular function: catalytic activity (GO:0003824);; cellular component: cell (GO:0005623);; cellular component: macromolecular complex (GO:0032991);; cellular component: organelle (GO:0043226);; cellular component: organelle part (GO:0…	--
Medtr5g014140.JCVIMt4.0v1	c50984.graph_c0	424.33	13.27	94.33	2.85	1.4e-36	up	2.11631	[G]	Carbohydrate transport and metabolism	Molecular Function: magnesium ion binding (GO:0000287);; Molecular Function: pyruvate kinase activity (GO:0004743);; Biological Process: glycolytic process (GO:0006096);; Cellular Component: chloroplast stroma (GO:0009570);; Molecular Function: kinase activity (GO:0016301);; Molecular Function: potassium ion binding (GO:0030955);;	K00873|0|mtr:MTR_5g014140|K00873 pyruvate kinase [EC:2.7.1.40] | (RefSeq) pyruvate kinase family protein	[G]	Carbohydrate transport and metabolism	Pyruvate kinase, barrel domain;; Pyruvate kinase, alpha/beta domain;; POT family	Pyruvate kinase isozyme G, chloroplastic OS=Nicotiana tabacum OX=4097 PE=2 SV=1	G	Carbohydrate transport and metabolism	pyruvate kinase family protein [Medicago truncatula]	molecular function: binding (GO:0005488);; biological process: metabolic process (GO:0008152);; biological process: cellular process (GO:0009987);; biological process: single-organism process (GO:0044699);; molecular function: catalytic activity (GO:0003824);; cellular component: cell (GO:0005623);; cellular component: organelle (GO:0043226);; cellular component: organelle part (GO:0044422);; cel…	Glycolysis / Gluconeogenesis (ko00010);; Purine metabolism (ko00230);; Pyruvate metabolism (ko00620);; Carbon metabolism (ko01200);; Biosynthesis of amino acids (ko01230)
Medtr8g099775.JCVIMt4.0v1	c45201.graph_c0	15516.3	914.57	3080.67	155.76	1.66e-14	up	2.11112	[G]	Carbohydrate transport and metabolism	Biological Process: polysaccharide catabolic process (GO:0000272);; Molecular Function: beta-amylase activity (GO:0016161);;	K01177|0|mtr:MTR_8g099775|K01177 beta-amylase [EC:3.2.1.2] | (RefSeq) glycoside hydrolase family 14 protein	--	--	Glycosyl hydrolase family 14;; Glycosyl hydrolase family 14;; Glycosyl hydrolase family 14	Beta-amylase 2, chloroplastic OS=Arabidopsis thaliana OX=3702 GN=BAM2 PE=1 SV=2	S	Function unknown	glycoside hydrolase family 14 protein [Medicago truncatula]	biological process: metabolic process (GO:0008152);; molecular function: catalytic activity (GO:0003824)	Starch and sucrose metabolism (ko00500)
Medtr6g463830.JCVIMt4.0v1	c51478.graph_c1	325.33	8.48	71.67	2.1	8.11e-26	up	2.11063	[X]	Mobilome: prophages, transposons	--	--	[R]	General function prediction only	Reverse transcriptase (RNA-dependent DNA polymerase);; gag-polypeptide of LTR copia-type;; Integrase core domain;; GAG-pre-integrase domain	Retrovirus-related Pol polyprotein from transposon RE1 OS=Arabidopsis thaliana OX=3702 GN=RE1 PE=2 SV=1	S	Function unknown	hypothetical protein L195_g011512 [Trifolium pratense]	--	--
--	c32459.graph_c0	33.33	3.17	4.33	0.38	1.69e-06	up	2.10596	--	--	--	--	[R]	General function prediction only	Domain of unknown function (DUF4283);; Zinc knuckle;; Zinc knuckle	--	S	Function unknown	hypothetical protein L195_g002907 [Trifolium pratense]	--	--
Medtr4g029730.JCVIMt4.0v1	c41918.graph_c0	1655.67	253.43	378.67	59.81	2.68e-80	up	2.10573	--	--	--	--	--	--	Extensin-like protein repeat	--	--	--	--	--	--
--	c38978.graph_c0	161.33	6.8	30.67	1.32	4.02e-12	up	2.10351	--	--	--	--	[L]	Replication, recombination and repair	DDE superfamily endonuclease;; Plant transposon protein	Protein ANTAGONIST OF LIKE HETEROCHROMATIN PROTEIN 1 OS=Arabidopsis thaliana OX=3702 GN=ALP1 PE=1 SV=1	S	Function unknown	PREDICTED: putative nuclease HARBI1 [Cicer arietinum]	--	--
Medtr0219s0070.JCVIMt4.0v1	c38855.graph_c0	38	2.38	5.33	0.33	1.11e-06	up	2.09955	[P]	Inorganic ion transport and metabolism	Molecular Function: carbonate dehydratase activity (GO:0004089);; Biological Process: one-carbon metabolic process (GO:0006730);; Molecular Function: zinc ion binding (GO:0008270);;	K01674|5.37133e-151|cam:101501720|K01674 carbonic anhydrase [EC:4.2.1.1] | (RefSeq) alpha carbonic anhydrase 7-like	[R]	General function prediction only	Eukaryotic-type carbonic anhydrase	Alpha carbonic anhydrase 7 OS=Arabidopsis thaliana OX=3702 GN=ACA7 PE=2 SV=1	P	Inorganic ion transport and metabolism	PREDICTED: alpha carbonic anhydrase 7-like [Cicer arietinum]	molecular function: catalytic activity (GO:0003824);; biological process: metabolic process (GO:0008152);; biological process: cellular process (GO:0009987);; biological process: single-organism process (GO:0044699);; molecular function: binding (GO:0005488)	Nitrogen metabolism (ko00910)
Medtr4g035330.JCVIMt4.0v1	c49044.graph_c0	197	20.5	43	4.25	7.58e-21	up	2.09668	[QV]	Secondary metabolites biosynthesis, transport and catabolism ;; Defense mechanisms	Molecular Function: iron ion binding (GO:0005506);; Cellular Component: integral component of membrane (GO:0016021);; Molecular Function: oxidoreductase activity, acting on paired donors, with incorporation or reduction of molecular oxygen, NAD(P)H as one donor, and incorporation of one atom of oxygen (GO:0016709);; Molecular Function: heme binding (GO:0020037);; Biological Process: indole glucos…	--	[Q]	Secondary metabolites biosynthesis, transport and catabolism	Cytochrome P450	Isoflavone 2&apos;-hydroxylase OS=Glycyrrhiza echinata OX=46348 GN=CYP81E1 PE=1 SV=2	Q	Secondary metabolites biosynthesis, transport and catabolism	cytochrome P450 family 81 protein [Medicago truncatula]	molecular function: binding (GO:0005488);; cellular component: membrane (GO:0016020);; cellular component: membrane part (GO:0044425);; biological process: metabolic process (GO:0008152);; biological process: single-organism process (GO:0044699);; molecular function: catalytic activity (GO:0003824);; biological process: cellular process (GO:0009987);; biological process: response to stimulus (GO:…	--
Medtr1g080680.JCVIMt4.0v1	c17626.graph_c0	106	11.14	21.33	2.25	2.06e-13	up	2.09653	--	--	Molecular Function: nucleic acid binding (GO:0003676);;	--	--	--	Alba	Uncharacterized protein At2g34160 OS=Arabidopsis thaliana OX=3702 GN=At2g34160 PE=1 SV=1	S	Function unknown	alba DNA/RNA-binding protein [Medicago truncatula]	molecular function: binding (GO:0005488)	--
--	c17855.graph_c0	33.67	4.13	4.67	0.55	1.47e-06	up	2.09341	--	--	--	--	--	--	--	--	--	--	--	--	--
Medtr2g090710.JCVIMt4.0v1	c44800.graph_c0	73.33	1.64	14	0.31	1.43e-10	up	2.08503	[K]	Transcription	Molecular Function: protein serine/threonine kinase activity (GO:0004674);; Molecular Function: ATP binding (GO:0005524);; Biological Process: lateral root morphogenesis (GO:0010102);; Biological Process: floral organ abscission (GO:0010227);; Biological Process: regulation of gene expression (GO:0010468);; Cellular Component: integral component of membrane (GO:0016021);; Biological Process: pect…	--	--	--	Leucine rich repeat;; Protein kinase domain;; Protein tyrosine kinase;; Leucine Rich repeats (2 copies);; Leucine rich repeat N-terminal domain;; Leucine Rich Repeat	Receptor-like protein kinase HSL1 OS=Arabidopsis thaliana OX=3702 GN=HSL1 PE=2 SV=1	S	Function unknown	LRR receptor-like kinase family protein [Medicago truncatula]	biological process: metabolic process (GO:0008152);; biological process: cellular process (GO:0009987);; molecular function: catalytic activity (GO:0003824);; molecular function: binding (GO:0005488);; biological process: multicellular organismal process (GO:0032501);; biological process: developmental process (GO:0032502);; biological process: single-organism process (GO:0044699);; biological pr…	--
Medtr5g066180.JCVIMt4.0v1	c42177.graph_c0	729.33	39.72	166.33	9.22	6.71e-51	up	2.08132	--	--	Biological Process: protein import into nucleus, translocation (GO:0000060);; Molecular Function: transcription factor activity, sequence-specific DNA binding (GO:0003700);; Cellular Component: nucleus (GO:0005634);; Cellular Component: cytoplasm (GO:0005737);; Biological Process: regulation of transcription, DNA-templated (GO:0006355);; Biological Process: maintenance of inflorescence meristem i…	K09260|1.57481e-132|mtr:MTR_5g066180|K09260 MADS-box transcription enhancer factor 2A | (RefSeq) MADS-box transcription factor	[K]	Transcription	SRF-type transcription factor (DNA-binding and dimerisation domain);; K-box region	MADS-box protein SVP OS=Arabidopsis thaliana OX=3702 GN=SVP PE=1 SV=1	K	Transcription	MADS-box transcription factor [Medicago truncatula]	biological process: single-organism process (GO:0044699);; biological process: localization (GO:0051179);; biological process: biological regulation (GO:0065007);; molecular function: nucleic acid binding transcription factor activity (GO:0001071);; cellular component: cell (GO:0005623);; cellular component: organelle (GO:0043226);; cellular component: cell part (GO:0044464);; biological process:…	--
Medtr6g033660.JCVIMt4.0v1	c38401.graph_c0	307.67	73.52	69.67	16.64	1.43e-30	up	2.07712	[G]	Carbohydrate transport and metabolism	Biological Process: flavonoid biosynthetic process (GO:0009813);; Cellular Component: intracellular membrane-bounded organelle (GO:0043231);; Molecular Function: isoflavone 7-O-glucosyltransferase activity (GO:0050004);; Biological Process: flavonoid glucuronidation (GO:0052696);; Molecular Function: quercetin 3-O-glucosyltransferase activity (GO:0080043);; Molecular Function: quercetin 7-O-gluco…	--	[GC]	--	UDP-glucoronosyl and UDP-glucosyl transferase	Isoflavone 7-O-glucosyltransferase 1 OS=Glycine max OX=3847 GN=GmIF7GT1 PE=1 SV=1	S	Function unknown	UDP-glucosyl transferase 88A1 [Medicago truncatula]	biological process: metabolic process (GO:0008152);; cellular component: cell (GO:0005623);; cellular component: organelle (GO:0043226);; cellular component: cell part (GO:0044464);; molecular function: catalytic activity (GO:0003824);; biological process: cellular process (GO:0009987);; biological process: single-organism process (GO:0044699)	--
Medtr1g100623.JCVIMt4.0v1	c36253.graph_c0	1705.67	175.95	391.33	39.9	5.22e-43	up	2.07557	--	--	--	--	--	--	--	--	S	Function unknown	hypothetical protein MTR_1g100623 [Medicago truncatula]	--	--
Medtr1g115345.JCVIMt4.0v1	c24379.graph_c0	167	14.62	34.33	3.06	5.95e-15	up	2.07399	--	--	Molecular Function: DNA binding (GO:0003677);; Molecular Function: metal ion binding (GO:0046872);;	--	[R]	General function prediction only	C2H2-type zinc finger;; C2H2-type zinc finger	Zinc finger protein ZAT11 OS=Arabidopsis thaliana OX=3702 GN=ZAT11 PE=2 SV=1	S	Function unknown	C2H2-type zinc finger protein [Medicago truncatula]	molecular function: binding (GO:0005488)	--
Medtr1g056910.JCVIMt4.0v1	c42898.graph_c0	69.67	2.64	10.67	0.43	2.77e-07	up	2.06738	[D]	Cell cycle control, cell division, chromosome partitioning	Molecular Function: ubiquitin-protein transferase activity (GO:0004842);; Biological Process: protein ubiquitination (GO:0016567);; Molecular Function: ligase activity (GO:0016874);;	--	--	--	U-box domain	E3 ubiquitin-protein ligase PUB24 OS=Arabidopsis thaliana OX=3702 GN=PUB24 PE=1 SV=1	O	Posttranslational modification, protein turnover, chaperones	E3 ubiquitin-protein ligase PUB23-like protein [Medicago truncatula]	biological process: metabolic process (GO:0008152);; biological process: cellular process (GO:0009987);; molecular function: catalytic activity (GO:0003824)	--
Medtr8g070770.JCVIMt4.0v1	c35937.graph_c0	539.33	79.74	123.67	18.1	3.34e-30	up	2.06371	--	--	Biological Process: proteolysis (GO:0006508);; Molecular Function: peptidase activity (GO:0008233);; Biological Process: killing of cells of other organism (GO:0031640);; Biological Process: defense response to fungus (GO:0050832);;	--	--	--	Gamma-thionin family	Defensin-like protein OS=Petunia integrifolia OX=4103 PE=2 SV=1	S	Function unknown	Defensin MtDef4.2 [Medicago truncatula]	biological process: metabolic process (GO:0008152);; molecular function: catalytic activity (GO:0003824);; biological process: cell killing (GO:0001906);; biological process: multi-organism process (GO:0051704);; biological process: response to stimulus (GO:0050896)	--
Medtr3g113160.JCVIMt4.0v1	c44462.graph_c0	100	11.97	20	6.17	7.9e-12	up	2.06098	--	--	Molecular Function: carboxylic ester hydrolase activity (GO:0052689);;	--	[R]	General function prediction only	--	Probable 1-acylglycerol-3-phosphate O-acyltransferase OS=Oryza sativa subsp. japonica OX=39947 GN=Os09g0520200 PE=3 SV=3	S	Function unknown	alpha/beta fold hydrolase [Medicago truncatula]	molecular function: catalytic activity (GO:0003824)	--
Medtr8g087710.JCVIMt4.0v1	c37312.graph_c0	214.33	13.84	44.67	2.83	1.41e-15	up	2.06081	[G]	Carbohydrate transport and metabolism	Cellular Component: integral component of plasma membrane (GO:0005887);; Biological Process: water transport (GO:0006833);; Biological Process: cellular water homeostasis (GO:0009992);; Molecular Function: water channel activity (GO:0015250);; Molecular Function: glycerol channel activity (GO:0015254);; Biological Process: glycerol transport (GO:0015793);; Biological Process: ion transmembrane tr…	K09874|6.33022e-106|mtr:MTR_8g087710|K09874 aquaporin NIP | (RefSeq) major intrinsic protein (MIP) family transporter	[G]	Carbohydrate transport and metabolism	Major intrinsic protein	Nodulin-26 OS=Glycine max OX=3847 PE=1 SV=2	G	Carbohydrate transport and metabolism	unknown [Medicago truncatula]	cellular component: cell (GO:0005623);; cellular component: membrane (GO:0016020);; cellular component: membrane part (GO:0044425);; cellular component: cell part (GO:0044464);; biological process: single-organism process (GO:0044699);; biological process: localization (GO:0051179);; biological process: cellular process (GO:0009987);; biological process: biological regulation (GO:0065007);; biolo…	--
Medtr4g017650.JCVIMt4.0v1	c39131.graph_c0	80.67	4.46	15	0.82	2.29e-09	up	2.0568	[R]	General function prediction only	Cellular Component: integral component of membrane (GO:0016021);;	K06910|4.42233e-111|mtr:MTR_4g017650|K06910 uncharacterized protein | (RefSeq) phosphatidylethanolamine-binding protein	--	--	Phosphatidylethanolamine-binding protein	--	S	Function unknown	phosphatidylethanolamine-binding protein [Medicago truncatula]	cellular component: membrane (GO:0016020);; cellular component: membrane part (GO:0044425)	--
Medtr3g114500.JCVIMt4.0v1	c33823.graph_c0	93.67	5.69	19.33	1.13	6.05e-12	up	2.05665	--	--	Molecular Function: zinc ion binding (GO:0008270);; Cellular Component: integral component of membrane (GO:0016021);; Biological Process: protein ubiquitination (GO:0016567);; Molecular Function: ligase activity (GO:0016874);; Biological Process: proteasome-mediated ubiquitin-dependent protein catabolic process (GO:0043161);; Molecular Function: ubiquitin protein ligase activity (GO:0061630);;	K19037|1.72345e-82|mtr:MTR_3g114500|K19037 E3 ubiquitin-protein ligase ATL23 [EC:2.3.2.27] | (RefSeq) zinc finger, C3HC4 type (RING finger) protein	[O]	Posttranslational modification, protein turnover, chaperones	Ring finger domain;; RING-like zinc finger;; Zinc finger, C3HC4 type (RING finger);; RING-H2 zinc finger domain;; Zinc finger, C3HC4 type (RING finger);; Zinc finger, C3HC4 type (RING finger)	E3 ubiquitin-protein ligase ATL23 OS=Arabidopsis thaliana OX=3702 GN=ATL23 PE=1 SV=2	O	Posttranslational modification, protein turnover, chaperones	zinc finger, C3HC4 type (RING finger) protein [Medicago truncatula]	molecular function: binding (GO:0005488);; cellular component: membrane (GO:0016020);; cellular component: membrane part (GO:0044425);; biological process: metabolic process (GO:0008152);; biological process: cellular process (GO:0009987);; molecular function: catalytic activity (GO:0003824)	--
Medtr8g059170.JCVIMt4.0v1	c51234.graph_c0	3734.67	143.04	702.33	28.3	3.72e-10	up	2.05469	--	--	Molecular Function: DNA binding (GO:0003677);; Cellular Component: nucleus (GO:0005634);; Biological Process: regulation of transcription, DNA-templated (GO:0006355);;	--	--	--	No apical meristem (NAM) protein	NAC domain-containing protein 72 OS=Arabidopsis thaliana OX=3702 GN=NAC072 PE=2 SV=1	K	Transcription	NAC3 [Medicago falcata]	molecular function: binding (GO:0005488);; cellular component: cell (GO:0005623);; cellular component: organelle (GO:0043226);; cellular component: cell part (GO:0044464);; biological process: biological regulation (GO:0065007)	--
Medtr8g091950.JCVIMt4.0v1	c37380.graph_c0	69.67	6.41	13.33	1.28	1.01e-09	up	2.05468	--	--	--	--	--	--	--	--	S	Function unknown	hypothetical protein MTR_8g091950 [Medicago truncatula]	--	--
Medtr4g077210.JCVIMt4.0v1	c44657.graph_c2	545.67	17.12	122.33	3.91	5.55e-28	up	2.04227	[QV]	Secondary metabolites biosynthesis, transport and catabolism ;; Defense mechanisms	Molecular Function: iron ion binding (GO:0005506);; Cellular Component: integral component of membrane (GO:0016021);; Molecular Function: oxidoreductase activity, acting on paired donors, with incorporation or reduction of molecular oxygen, NAD(P)H as one donor, and incorporation of one atom of oxygen (GO:0016709);; Molecular Function: heme binding (GO:0020037);; Biological Process: secondary met…	--	[Q]	Secondary metabolites biosynthesis, transport and catabolism	Cytochrome P450;; Cytochrome P450	Isoflavone 2&apos;-hydroxylase OS=Glycyrrhiza echinata OX=46348 GN=CYP81E1 PE=1 SV=2	Q	Secondary metabolites biosynthesis, transport and catabolism	cytochrome P450 family protein [Medicago truncatula]	molecular function: binding (GO:0005488);; cellular component: membrane (GO:0016020);; cellular component: membrane part (GO:0044425);; biological process: metabolic process (GO:0008152);; biological process: single-organism process (GO:0044699);; molecular function: catalytic activity (GO:0003824)	--
Medtr1g117130.JCVIMt4.0v1	c40434.graph_c0	77.67	8.97	12	1.53	4.85e-07	up	2.04021	--	--	--	--	--	--	--	--	--	--	--	--	--
Medtr6g033455.JCVIMt4.0v1	c50090.graph_c0	1308.33	79.94	312.67	20.45	5.56e-58	up	2.03959	--	--	--	--	--	--	--	--	--	--	hypothetical protein MTR_6g033455 [Medicago truncatula]	--	--
Medtr6g033660.JCVIMt4.0v1	c52850.graph_c0	3015	106.39	735.33	23.91	1.19e-93	up	2.03896	--	--	Biological Process: metabolic process (GO:0008152);; Molecular Function: transferase activity, transferring hexosyl groups (GO:0016758);;	--	[GC]	--	UDP-glucoronosyl and UDP-glucosyl transferase	UDP-glycosyltransferase 1 OS=Pueraria montana var. lobata OX=3893 GN=UGT1 PE=1 SV=1	S	Function unknown	UDP-glucosyl transferase 88A1 [Medicago truncatula]	biological process: metabolic process (GO:0008152);; molecular function: catalytic activity (GO:0003824)	--
Medtr5g030110.JCVIMt4.0v1	c42090.graph_c0	59	2.22	11.33	0.41	1.14e-08	up	2.03797	--	--	--	--	[L]	Replication, recombination and repair	Domain of unknown function DUF223	--	L	Replication, recombination and repair	animal RPA1 domain protein [Medicago truncatula]	--	--
Medtr3g101420.JCVIMt4.0v1	c33889.graph_c0	177.33	9.61	40	2.16	1e-19	up	2.0349	[P]	Inorganic ion transport and metabolism	Biological Process: metabolic process (GO:0008152);; Molecular Function: hydrolase activity (GO:0016787);;	--	[V]	Defense mechanisms	alpha/beta hydrolase fold;; Carboxylesterase family	Probable carboxylesterase 2 OS=Arabidopsis thaliana OX=3702 GN=CXE2 PE=2 SV=1	I	Lipid transport and metabolism	gibberellin receptor GID1 [Medicago truncatula]	biological process: metabolic process (GO:0008152);; molecular function: catalytic activity (GO:0003824)	--
Medtr5g064530.JCVIMt4.0v1	c53737.graph_c0	32.67	4.76	4.33	0.56	1.07e-05	up	2.03248	--	--	--	--	--	--	--	--	--	--	leguminosin group485 secreted peptide [Medicago truncatula]	--	--
Medtr5g011820.JCVIMt4.0v1	c43463.graph_c0	892.33	54.15	210.67	12.76	1.58e-45	up	2.03163	--	--	--	--	--	--	Protein of unknown function (DUF1442)	--	S	Function unknown	DUF1442 family protein [Medicago truncatula]	--	--
Medtr1g098160.JCVIMt4.0v1	c46529.graph_c0	13130	182.11	4321.33	59.22	9.18e-115	up	1.60546	--	--	Cellular Component: nucleoplasm (GO:0005654);; Biological Process: regulation of transcription, DNA-templated (GO:0006355);; Biological Process: response to cold (GO:0009409);; Biological Process: response to blue light (GO:0009637);; Biological Process: response to far red light (GO:0010218);; Biological Process: temperature compensation of the circadian clock (GO:0010378);; Biological Process: …	K12124|0|cam:101511540|K12124 GIGANTEA | (RefSeq) protein GIGANTEA	--	--	--	Protein GIGANTEA OS=Arabidopsis thaliana OX=3702 GN=GI PE=1 SV=2	S	Function unknown	gigantea protein 1B [Medicago truncatula]	cellular component: cell (GO:0005623);; cellular component: membrane-enclosed lumen (GO:0031974);; cellular component: organelle (GO:0043226);; cellular component: organelle part (GO:0044422);; cellular component: cell part (GO:0044464);; biological process: biological regulation (GO:0065007);; biological process: response to stimulus (GO:0050896)	Circadian rhythm - plant (ko04712)
Medtr7g062310.JCVIMt4.0v1	c52573.graph_c0	258.67	9.19	60.67	2.34	2.53e-25	up	2.0253	[DPM]	Cell cycle control, cell division, chromosome partitioning ;; Inorganic ion transport and metabolism ;; Cell wall/membrane/envelope biogenesis	Molecular Function: copper ion binding (GO:0005507);; Biological Process: lignin biosynthetic process (GO:0009809);; Molecular Function: oxidoreductase activity, oxidizing metal ions (GO:0016722);; Biological Process: lignin catabolic process (GO:0046274);; Cellular Component: apoplast (GO:0048046);; Molecular Function: hydroquinone:oxygen oxidoreductase activity (GO:0052716);; Biological Process…	K05909|0|mtr:MTR_7g062310|K05909 laccase [EC:1.10.3.2] | (RefSeq) laccase/diphenol oxidase family protein	[Q]	Secondary metabolites biosynthesis, transport and catabolism	Multicopper oxidase;; Multicopper oxidase;; Multicopper oxidase	Laccase-17 OS=Arabidopsis thaliana OX=3702 GN=LAC17 PE=2 SV=1	Q	Secondary metabolites biosynthesis, transport and catabolism	laccase/diphenol oxidase family protein [Medicago truncatula]	molecular function: binding (GO:0005488);; biological process: metabolic process (GO:0008152);; biological process: cellular process (GO:0009987);; biological process: single-organism process (GO:0044699);; molecular function: catalytic activity (GO:0003824);; cellular component: extracellular region (GO:0005576)	--
Medtr3g110330.JCVIMt4.0v1	c37926.graph_c0	1976	83.7	483.33	20.22	4.59e-107	up	2.02337	[C]	Energy production and conversion	Molecular Function: malate dehydrogenase (decarboxylating) (NAD+) activity (GO:0004471);; Molecular Function: malate dehydrogenase (decarboxylating) (NADP+) activity (GO:0004473);; Cellular Component: cytoplasm (GO:0005737);; Biological Process: malate metabolic process (GO:0006108);; Molecular Function: oxaloacetate decarboxylase activity (GO:0008948);; Molecular Function: metal ion binding (GO:…	K00029|0|mtr:MTR_3g110330|K00029 malate dehydrogenase (oxaloacetate-decarboxylating)(NADP+) [EC:1.1.1.40] | (RefSeq) NADP-dependent malic enzyme-like protein	[C]	Energy production and conversion	Malic enzyme, NAD binding domain	NADP-dependent malic enzyme OS=Phaseolus vulgaris OX=3885 GN=ME1 PE=2 SV=1	C	Energy production and conversion	NADP-dependent malic enzyme-like protein [Medicago truncatula]	biological process: metabolic process (GO:0008152);; biological process: single-organism process (GO:0044699);; molecular function: catalytic activity (GO:0003824);; cellular component: cell (GO:0005623);; cellular component: cell part (GO:0044464);; biological process: cellular process (GO:0009987);; molecular function: binding (GO:0005488)	Pyruvate metabolism (ko00620);; Carbon fixation in photosynthetic organisms (ko00710);; Carbon metabolism (ko01200)
Medtr7g057160.JCVIMt4.0v1	c37687.graph_c0	60	4.32	11.67	0.84	7.97e-09	up	2.02331	--	--	Molecular Function: transcription factor activity, sequence-specific DNA binding (GO:0003700);; Biological Process: regulation of transcription, DNA-templated (GO:0006355);; Molecular Function: sequence-specific DNA binding (GO:0043565);;	K16241|1.62431e-83|mtr:MTR_7g057160|K16241 transcription factor HY5 | (RefSeq) BZIP transcription factor	[K]	Transcription	bZIP transcription factor;; Basic region leucine zipper	Transcription factor HY5-like OS=Arabidopsis thaliana OX=3702 GN=HYH PE=1 SV=1	K	Transcription	BZIP transcription factor [Medicago truncatula]	biological process: biological regulation (GO:0065007);; molecular function: nucleic acid binding transcription factor activity (GO:0001071);; molecular function: binding (GO:0005488)	Circadian rhythm - plant (ko04712)
Medtr3g092890.JCVIMt4.0v1	c40782.graph_c0	2248.67	104.75	523.67	24.9	1.81e-41	up	2.01925	[Q]	Secondary metabolites biosynthesis, transport and catabolism	Biological Process: response to bacterium (GO:0009617);; Biological Process: response to fungus (GO:0009620);; Molecular Function: metal ion binding (GO:0046872);; Molecular Function: dioxygenase activity (GO:0051213);; Biological Process: oxidation-reduction process (GO:0055114);;	--	[QR]	--	2OG-Fe(II) oxygenase superfamily;; non-haem dioxygenase in morphine synthesis N-terminal	Protein DOWNY MILDEW RESISTANCE 6 OS=Arabidopsis thaliana OX=3702 GN=DMR6 PE=1 SV=1	S	Function unknown	2OG-Fe(II) oxygenase family oxidoreductase [Medicago truncatula]	biological process: response to stimulus (GO:0050896);; biological process: multi-organism process (GO:0051704);; molecular function: binding (GO:0005488);; biological process: metabolic process (GO:0008152);; biological process: single-organism process (GO:0044699);; molecular function: catalytic activity (GO:0003824)	--
Medtr7g024390.JCVIMt4.0v1	c44438.graph_c0	247.33	73.64	57	17.06	6.69e-21	up	2.01854	[O]	Posttranslational modification, protein turnover, chaperones	Molecular Function: ATP binding (GO:0005524);;	K03283|1.02302e-73|mtr:MTR_7g024390|K03283 heat shock 70kDa protein 1/8 | (RefSeq) heat shock cognate 70 kDa protein	[O]	Posttranslational modification, protein turnover, chaperones	Hsp70 protein;; MreB/Mbl protein;; NAD-specific glutamate dehydrogenase	Chloroplast envelope membrane 70 kDa heat shock-related protein OS=Spinacia oleracea OX=3562 GN=SCE70 PE=1 SV=3	O	Posttranslational modification, protein turnover, chaperones	heat shock protein 70, partial [Cenchrus americanus]	molecular function: binding (GO:0005488)	Spliceosome (ko03040);; Protein processing in endoplasmic reticulum (ko04141);; Endocytosis (ko04144)
Medtr8g011650.JCVIMt4.0v1	c39068.graph_c0	1288	77.87	316.33	18.7	3.97e-58	up	2.01751	--	--	Cellular Component: integral component of membrane (GO:0016021);;	--	[T]	Signal transduction mechanisms	Protein of unknown function (DUF568)	Auxin-induced in root cultures protein 12 OS=Arabidopsis thaliana OX=3702 GN=AIR12 PE=1 SV=3	S	Function unknown	auxin-induced in root cultures protein, putative [Medicago truncatula]	cellular component: membrane (GO:0016020);; cellular component: membrane part (GO:0044425)	--
Medtr2g103140.JCVIMt4.0v1	c42648.graph_c0	322	10.43	75	2.66	2.95e-26	up	2.0164	[R]	General function prediction only	Biological Process: protein depalmitoylation (GO:0002084);; Molecular Function: lysophospholipase activity (GO:0004622);; Cellular Component: cytoplasm (GO:0005737);; Molecular Function: palmitoyl-(protein) hydrolase activity (GO:0008474);;	K06130|3.13837e-171|mtr:MTR_2g103140|K06130 lysophospholipase II [EC:3.1.1.5] | (RefSeq) acyl thioesterase-like protein	[I]	Lipid transport and metabolism	Phospholipase/Carboxylesterase;; Serine hydrolase (FSH1)	Probable carboxylesterase Os04g0669500 OS=Oryza sativa subsp. japonica OX=39947 GN=Os04g0669500 PE=3 SV=1	S	Function unknown	acyl thioesterase-like protein [Medicago truncatula]	biological process: metabolic process (GO:0008152);; biological process: cellular process (GO:0009987);; molecular function: catalytic activity (GO:0003824);; cellular component: cell (GO:0005623);; cellular component: cell part (GO:0044464)	Glycerophospholipid metabolism (ko00564)
Medtr3g092435.JCVIMt4.0v1	c53719.graph_c0	62.67	9.67	11	1.76	1.54e-07	up	2.01255	--	--	--	--	--	--	--	--	--	--	--	--	--
Medtr1g014510.JCVIMt4.0v1	c33252.graph_c0	137.33	5.1	31.33	1.13	6.07e-14	up	2.00578	--	--	Cellular Component: integral component of membrane (GO:0016021);; Molecular Function: transmembrane transporter activity (GO:0022857);; Biological Process: transmembrane transport (GO:0055085);;	--	--	--	EamA-like transporter family	WAT1-related protein At5g40240 OS=Arabidopsis thaliana OX=3702 GN=At5g40240 PE=2 SV=1	S	Function unknown	nodulin MtN21/EamA-like transporter family protein [Medicago truncatula]	cellular component: membrane (GO:0016020);; cellular component: membrane part (GO:0044425);; biological process: localization (GO:0051179);; molecular function: transporter activity (GO:0005215)	--
Medtr1g107555.JCVIMt4.0v1	c44982.graph_c0	3667.33	69.75	913	17.13	9.38e-101	up	2.00466	[DPM]	Cell cycle control, cell division, chromosome partitioning ;; Inorganic ion transport and metabolism ;; Cell wall/membrane/envelope biogenesis	Molecular Function: copper ion binding (GO:0005507);; Molecular Function: oxidoreductase activity, oxidizing metal ions (GO:0016722);; Biological Process: oxidation-reduction process (GO:0055114);;	--	--	--	Multicopper oxidase;; Multicopper oxidase;; Multicopper oxidase	Multicopper oxidase LPR2 OS=Arabidopsis thaliana OX=3702 GN=LPR2 PE=2 SV=1	Q	Secondary metabolites biosynthesis, transport and catabolism	spore coat A-like protein [Medicago truncatula]	molecular function: binding (GO:0005488);; biological process: metabolic process (GO:0008152);; biological process: single-organism process (GO:0044699);; molecular function: catalytic activity (GO:0003824)	--
Medtr4g122750.JCVIMt4.0v1	c30897.graph_c1	35.67	8.96	5.67	1.38	2.82e-06	up	2.00414	--	--	Molecular Function: enzyme inhibitor activity (GO:0004857);; Biological Process: negative regulation of catalytic activity (GO:0043086);;	--	--	--	Plant invertase/pectin methylesterase inhibitor	Cell wall / vacuolar inhibitor of fructosidase 1 OS=Arabidopsis thaliana OX=3702 GN=C/VIF1 PE=1 SV=1	G	Carbohydrate transport and metabolism	plant invertase/pectin methylesterase inhibitor [Medicago truncatula]	biological process: biological regulation (GO:0065007);; molecular function: molecular function regulator (GO:0098772)	--
Medtr7g085860.JCVIMt4.0v1	c48648.graph_c1	109.33	2.67	22.67	0.55	6.06e-11	up	2.00222	[K]	Transcription	Molecular Function: nucleotide binding (GO:0000166);; Molecular Function: protein kinase activity (GO:0004672);; Cellular Component: membrane (GO:0016020);; Biological Process: phosphorylation (GO:0016310);;	--	--	--	Leucine rich repeat;; Leucine Rich repeats (2 copies);; Leucine rich repeat N-terminal domain;; Leucine rich repeat;; Leucine Rich Repeat	Receptor-like kinase TMK4 OS=Arabidopsis thaliana OX=3702 GN=TMK4 PE=1 SV=1	T	Signal transduction mechanisms	PREDICTED: probable receptor protein kinase TMK1 [Cicer arietinum]	molecular function: binding (GO:0005488);; biological process: metabolic process (GO:0008152);; biological process: cellular process (GO:0009987);; molecular function: catalytic activity (GO:0003824);; cellular component: membrane (GO:0016020)	--
Medtr4g066020.JCVIMt4.0v1	c41160.graph_c0	26	2.37	3.33	0.18	1.86e-05	up	1.99147	[J]	Translation, ribosomal structure and biogenesis	--	K10277|0|mtr:MTR_4g066020|K10277 lysine-specific demethylase 8 [EC:1.14.11.27] | (RefSeq) transcription factor jumonji (JmjC) domain protein	[BT]	--	Cupin-like domain;; Cupin superfamily protein;; JmjC domain, hydroxylase	Lysine-specific demethylase JMJ30 OS=Arabidopsis thaliana OX=3702 GN=JMJ30 PE=1 SV=1	S	Function unknown	transcription factor jumonji (JmjC) domain protein [Medicago truncatula]	--	--
Medtr3g086630.JCVIMt4.0v1	c37568.graph_c0	107	4.76	21.67	0.98	5.4e-10	up	1.99055	--	--	Molecular Function: catalytic activity (GO:0003824);; Molecular Function: zinc ion binding (GO:0008270);; Cellular Component: integral component of membrane (GO:0016021);;	K16285|2.46859e-86|mtr:MTR_3g086630|K16285 RING/U-box domain-containing protein [EC:2.3.2.27] | (RefSeq) C3HC4-type RING zinc finger protein	[O]	Posttranslational modification, protein turnover, chaperones	Ring finger domain;; RING-like zinc finger;; Zinc finger, C3HC4 type (RING finger);; Zinc finger, C3HC4 type (RING finger)	Probable E3 ubiquitin-protein ligase XERICO OS=Arabidopsis thaliana OX=3702 GN=XERICO PE=1 SV=1	O	Posttranslational modification, protein turnover, chaperones	C3HC4-type RING zinc finger protein [Medicago truncatula]	molecular function: catalytic activity (GO:0003824);; molecular function: binding (GO:0005488);; cellular component: membrane (GO:0016020);; cellular component: membrane part (GO:0044425)	--
Medtr2g006280.JCVIMt4.0v1	c40221.graph_c0	35.33	1.28	5.67	0.32	4.56e-06	up	1.98998	--	--	Molecular Function: calmodulin binding (GO:0005516);; Cellular Component: plasma membrane (GO:0005886);; Biological Process: defense response (GO:0006952);; Biological Process: response to biotic stimulus (GO:0009607);; Cellular Component: integral component of membrane (GO:0016021);;	K08472|0|mtr:MTR_2g006280|K08472 mlo protein | (RefSeq) seven transmembrane MLO family protein	--	--	Mlo family	MLO-like protein 4 OS=Arabidopsis thaliana OX=3702 GN=MLO4 PE=2 SV=2	D	Cell cycle control, cell division, chromosome partitioning	seven transmembrane MLO family protein [Medicago truncatula]	molecular function: binding (GO:0005488);; cellular component: cell (GO:0005623);; cellular component: membrane (GO:0016020);; cellular component: cell part (GO:0044464);; biological process: response to stimulus (GO:0050896);; cellular component: membrane part (GO:0044425)	--
Medtr1g054035.JCVIMt4.0v1	c45371.graph_c2	65.33	3.13	13	0.63	1.44e-08	up	1.98879	[I]	Lipid transport and metabolism	Biological Process: lipid metabolic process (GO:0006629);; Cellular Component: integral component of membrane (GO:0016021);; Molecular Function: oxidoreductase activity, acting on paired donors, with oxidation of a pair of donors resulting in the reduction of molecular oxygen to two molecules of water (GO:0016717);; Biological Process: oxidation-reduction process (GO:0055114);;	K10256|0|mtr:MTR_1g054035|K10256 omega-6 fatty acid desaturase / acyl-lipid omega-6 desaturase (Delta-12 desaturase) [EC:1.14.19.6 1.14.19.22] | (RefSeq) microsomal omega-3 fatty acid desaturase	--	--	Fatty acid desaturase;; Domain of unknown function (DUF3474)	Delta(12)-fatty-acid desaturase FAD2 OS=Vernicia fordii OX=73154 GN=FAD2 PE=1 SV=1	I	Lipid transport and metabolism	microsomal omega-3 fatty acid desaturase [Medicago truncatula]	biological process: metabolic process (GO:0008152);; biological process: single-organism process (GO:0044699);; cellular component: membrane (GO:0016020);; cellular component: membrane part (GO:0044425);; molecular function: catalytic activity (GO:0003824)	Biosynthesis of unsaturated fatty acids (ko01040);; Fatty acid metabolism (ko01212)
Medtr8g089110.JCVIMt4.0v1	c39322.graph_c0	195	14.46	45.67	3.33	2.39e-20	up	1.98857	--	--	Molecular Function: electron carrier activity (GO:0009055);; Cellular Component: integral component of membrane (GO:0016021);; Cellular Component: anchored component of plasma membrane (GO:0046658);;	--	--	--	Plastocyanin-like domain	Basic blue protein OS=Arabidopsis thaliana OX=3702 GN=ARPN PE=2 SV=2	S	Function unknown	basic blue-like protein [Medicago truncatula]	molecular function: electron carrier activity (GO:0009055);; cellular component: membrane (GO:0016020);; cellular component: membrane part (GO:0044425);; cellular component: cell (GO:0005623);; cellular component: cell part (GO:0044464)	--
Medtr0100s0170.JCVIMt4.0v1	c18099.graph_c0	25.33	0.79	3	0.1	3e-05	up	1.98307	--	--	--	--	[R]	General function prediction only	--	--	S	Function unknown	hypothetical protein L195_g004164, partial [Trifolium pratense]	--	--
Medtr6g465690.JCVIMt4.0v1	c45181.graph_c2	35.33	1.9	5.33	0.39	5.97e-06	up	1.9803	--	--	Molecular Function: DNA binding (GO:0003677);; Molecular Function: transcription factor activity, sequence-specific DNA binding (GO:0003700);; Cellular Component: nucleus (GO:0005634);; Biological Process: regulation of transcription, DNA-templated (GO:0006355);; Cellular Component: integral component of membrane (GO:0016021);;	--	--	--	--	Dehydration-responsive element-binding protein 1C OS=Arabidopsis thaliana OX=3702 GN=DREB1C PE=2 SV=2	K	Transcription	dehydration-responsive element-binding protein 1B [Medicago truncatula]	molecular function: binding (GO:0005488);; biological process: biological regulation (GO:0065007);; molecular function: nucleic acid binding transcription factor activity (GO:0001071);; cellular component: cell (GO:0005623);; cellular component: organelle (GO:0043226);; cellular component: cell part (GO:0044464);; cellular component: membrane (GO:0016020);; cellular component: membrane part (GO:0…	--
Medtr7g006540.JCVIMt4.0v1	c42591.graph_c1	715.33	18.68	180	4.51	5.94e-38	up	1.97748	[E]	Amino acid transport and metabolism	Molecular Function: transporter activity (GO:0005215);; Biological Process: oligopeptide transport (GO:0006857);; Cellular Component: integral component of membrane (GO:0016021);;	--	[E]	Amino acid transport and metabolism	POT family	Protein NRT1/ PTR FAMILY 6.1 OS=Arabidopsis thaliana OX=3702 GN=NPF6.1 PE=2 SV=1	E	Amino acid transport and metabolism	peptide transporter [Medicago truncatula]	biological process: localization (GO:0051179);; molecular function: transporter activity (GO:0005215);; cellular component: membrane (GO:0016020);; cellular component: membrane part (GO:0044425)	--
Medtr5g045170.JCVIMt4.0v1	c52347.graph_c1	250.33	8.9	60.67	2.37	9.63e-22	up	1.97545	--	--	--	--	[R]	General function prediction only	--	Retrovirus-related Pol polyprotein from transposon TNT 1-94 OS=Nicotiana tabacum OX=4097 PE=2 SV=1	S	Function unknown	cyclin-like F-box protein [Medicago truncatula]	--	--
Medtr5g067520.JCVIMt4.0v1	c48467.graph_c1	359.67	21.92	89.67	9.36	1.78e-26	up	1.97176	--	--	Cellular Component: integral component of membrane (GO:0016021);;	--	--	--	--	--	--	--	transmembrane protein, putative [Medicago truncatula]	cellular component: membrane (GO:0016020);; cellular component: membrane part (GO:0044425)	--
Medtr5g082750.JCVIMt4.0v1	c42733.graph_c0	47	6.12	8.33	1.12	7.61e-07	up	1.96763	[Q]	Secondary metabolites biosynthesis, transport and catabolism	Molecular Function: iron ion binding (GO:0005506);; Molecular Function: dioxygenase activity (GO:0051213);; Biological Process: oxidation-reduction process (GO:0055114);;	--	[QR]	--	non-haem dioxygenase in morphine synthesis N-terminal	Probable 2-oxoglutarate-dependent dioxygenase JRG21 OS=Arabidopsis thaliana OX=3702 GN=JRG21 PE=2 SV=1	S	Function unknown	unknown [Medicago truncatula]	molecular function: binding (GO:0005488);; biological process: metabolic process (GO:0008152);; biological process: single-organism process (GO:0044699);; molecular function: catalytic activity (GO:0003824)	--
Medtr7g052020.JCVIMt4.0v1	c43826.graph_c0	266	15.93	63	3.79	7.35e-19	up	1.96101	--	--	Molecular Function: kinase activity (GO:0016301);; Biological Process: phosphorylation (GO:0016310);;	--	--	--	Salt stress response/antifungal	Cysteine-rich repeat secretory protein 55 OS=Arabidopsis thaliana OX=3702 GN=CRRSP55 PE=2 SV=1	S	Function unknown	cysteine-rich RLK (receptor-like kinase) protein [Medicago truncatula]	biological process: metabolic process (GO:0008152);; biological process: cellular process (GO:0009987);; molecular function: catalytic activity (GO:0003824)	--
Medtr4g122130.JCVIMt4.0v1	c36914.graph_c0	28	3.01	4	0.44	1.53e-05	up	1.9591	--	--	Biological Process: phenylpropanoid biosynthetic process (GO:0009699);; Cellular Component: integral component of membrane (GO:0016021);; Molecular Function: guiding stereospecific synthesis activity (GO:0042349);; Biological Process: regulation of catalytic activity (GO:0050790);;	--	--	--	Dirigent-like protein	Dirigent protein 11 OS=Arabidopsis thaliana OX=3702 GN=DIR11 PE=2 SV=1	S	Function unknown	disease resistance-responsive, dirigent domain protein [Medicago truncatula]	biological process: metabolic process (GO:0008152);; biological process: cellular process (GO:0009987);; biological process: single-organism process (GO:0044699);; cellular component: membrane (GO:0016020);; cellular component: membrane part (GO:0044425);; biological process: biological regulation (GO:0065007);; molecular function: molecular function regulator (GO:0098772)	--
Medtr4g082950.JCVIMt4.0v1	c52160.graph_c1	523.67	7.82	131.33	1.87	2.67e-42	up	1.95837	[G]	Carbohydrate transport and metabolism	Cellular Component: cytoplasm (GO:0005737);; Biological Process: glycogen catabolic process (GO:0005980);; Molecular Function: glycogen phosphorylase activity (GO:0008184);; Molecular Function: pyridoxal phosphate binding (GO:0030170);;	K00688|0|mtr:MTR_4g082950|K00688 glycogen phosphorylase [EC:2.4.1.1] | (RefSeq) glycogen/starch/alpha-glucan phosphorylase family protein	[G]	Carbohydrate transport and metabolism	Carbohydrate phosphorylase;; Carbohydrate phosphorylase	Alpha-1,4 glucan phosphorylase L-2 isozyme, chloroplastic/amyloplastic OS=Solanum tuberosum OX=4113 GN=STP-1 PE=1 SV=1	G	Carbohydrate transport and metabolism	glycogen/starch/alpha-glucan phosphorylase family protein [Medicago truncatula]	cellular component: cell (GO:0005623);; cellular component: cell part (GO:0044464);; biological process: metabolic process (GO:0008152);; biological process: cellular process (GO:0009987);; biological process: single-organism process (GO:0044699);; molecular function: catalytic activity (GO:0003824);; molecular function: binding (GO:0005488)	Starch and sucrose metabolism (ko00500)
Medtr3g052480.JCVIMt4.0v1	c39124.graph_c1	74.33	4.57	15.67	1.15	3.3e-09	up	1.95737	[IR]	Lipid transport and metabolism ;; General function prediction only	Cellular Component: integral component of membrane (GO:0016021);; Molecular Function: hydrolase activity, acting on ester bonds (GO:0016788);;	--	--	--	GDSL-like Lipase/Acylhydrolase	GDSL esterase/lipase At5g55050 OS=Arabidopsis thaliana OX=3702 GN=At5g55050 PE=2 SV=1	S	Function unknown	GDSL-like lipase/acylhydrolase [Medicago truncatula]	cellular component: membrane (GO:0016020);; cellular component: membrane part (GO:0044425);; molecular function: catalytic activity (GO:0003824)	--
Medtr4g094715.JCVIMt4.0v1	c40239.graph_c0	103.33	3.19	22.67	0.66	5.3e-10	up	1.95437	[G]	Carbohydrate transport and metabolism	Molecular Function: polygalacturonase activity (GO:0004650);; Cellular Component: extracellular region (GO:0005576);; Biological Process: carbohydrate metabolic process (GO:0005975);; Molecular Function: lyase activity (GO:0016829);; Molecular Function: galacturan 1,4-alpha-galacturonidase activity (GO:0047911);; Biological Process: cell wall organization (GO:0071555);;	--	--	--	Glycosyl hydrolases family 28;; Pectate lyase superfamily protein	Polygalacturonase At1g48100 OS=Arabidopsis thaliana OX=3702 GN=At1g48100 PE=2 SV=1	M	Cell wall/membrane/envelope biogenesis	pectin lyase superfamily protein [Medicago truncatula]	molecular function: catalytic activity (GO:0003824);; cellular component: extracellular region (GO:0005576);; biological process: metabolic process (GO:0008152);; biological process: cellular process (GO:0009987);; biological process: cellular component organization or biogenesis (GO:0071840)	--
--	c37024.graph_c0	41	1.04	7	0.15	3.06e-06	up	1.95002	--	--	--	--	--	--	--	--	--	--	leguminosin group486 secreted peptide [Medicago truncatula]	--	--
Medtr5g098710.JCVIMt4.0v1	c36821.graph_c0	94.67	2.57	21.67	0.54	4.58e-10	up	1.94183	--	--	--	--	--	--	--	--	S	Function unknown	hypothetical protein MTR_5g098710 [Medicago truncatula]	--	--
Medtr1g030580.JCVIMt4.0v1	c41899.graph_c1	1493.33	93	380	23.67	1.68e-53	up	1.94093	--	--	Biological Process: amino acid transmembrane transport (GO:0003333);; Cellular Component: plasma membrane (GO:0005886);; Molecular Function: amino acid transmembrane transporter activity (GO:0015171);; Cellular Component: integral component of membrane (GO:0016021);; Biological Process: amino acid export (GO:0032973);; Biological Process: amino acid import (GO:0043090);; Biological Process: amino…	--	--	--	EamA-like transporter family	WAT1-related protein At1g44800 OS=Arabidopsis thaliana OX=3702 GN=At1g44800 PE=1 SV=1	S	Function unknown	nodulin MtN21/EamA-like transporter family protein [Medicago truncatula]	biological process: single-organism process (GO:0044699);; biological process: localization (GO:0051179);; cellular component: cell (GO:0005623);; cellular component: membrane (GO:0016020);; cellular component: cell part (GO:0044464);; molecular function: transporter activity (GO:0005215);; cellular component: membrane part (GO:0044425);; biological process: biological regulation (GO:0065007)	--
--	c42799.graph_c1	43	2.44	7.67	0.44	1.84e-06	up	1.93852	--	--	--	--	--	--	--	--	--	--	--	--	--
Medtr3g075030.JCVIMt4.0v1	c40669.graph_c0	79.33	4.01	17.67	0.88	3.21e-10	up	1.93359	--	--	--	--	--	--	--	--	--	--	hypothetical protein MTR_3g075030 [Medicago truncatula]	--	--
Medtr5g009970.JCVIMt4.0v1	c40614.graph_c0	32.67	1.14	5	0.19	1.38e-05	up	1.93196	[G]	Carbohydrate transport and metabolism	Molecular Function: cellulase activity (GO:0008810);; Biological Process: fruit ripening (GO:0009835);; Biological Process: cellulose catabolic process (GO:0030245);;	--	--	--	Glycosyl hydrolase family 9;; Glycosyl hydrolase family 9	Endoglucanase OS=Phaseolus vulgaris OX=3885 PE=2 SV=2	G	Carbohydrate transport and metabolism	endo-1,4-beta-glucanase [Medicago truncatula]	molecular function: catalytic activity (GO:0003824);; biological process: reproduction (GO:0000003);; biological process: reproductive process (GO:0022414);; biological process: multicellular organismal process (GO:0032501);; biological process: developmental process (GO:0032502);; biological process: single-organism process (GO:0044699);; biological process: metabolic process (GO:0008152);; biol…	--
Medtr8g040860.JCVIMt4.0v1	c52536.graph_c0	81	3.61	18	0.8	8.76e-10	up	1.92302	[I]	Lipid transport and metabolism	Biological Process: metabolic process (GO:0008152);; Molecular Function: hydrolase activity (GO:0016787);;	--	[V]	Defense mechanisms	alpha/beta hydrolase fold;; Carboxylesterase family;; Steryl acetyl hydrolase	2-hydroxyisoflavanone dehydratase OS=Glycyrrhiza echinata OX=46348 GN=HIDM PE=1 SV=1	I	Lipid transport and metabolism	2-hydroxyisoflavanone dehydratase [Medicago truncatula]	biological process: metabolic process (GO:0008152);; molecular function: catalytic activity (GO:0003824)	--
Medtr3g110320.JCVIMt4.0v1	c48496.graph_c0	2035.67	134.25	513	32.61	7.9e-38	up	1.9228	[G]	Carbohydrate transport and metabolism	Molecular Function: chitinase activity (GO:0004568);; Cellular Component: extracellular region (GO:0005576);; Biological Process: carbohydrate metabolic process (GO:0005975);; Biological Process: chitin catabolic process (GO:0006032);; Molecular Function: chitin binding (GO:0008061);;	K01183|0|mtr:MTR_3g110320|K01183 chitinase [EC:3.2.1.14] | (RefSeq) glycoside hydrolase family 18 protein	[G]	Carbohydrate transport and metabolism	Glycosyl hydrolases family 18	Class V chitinase OS=Arabidopsis thaliana OX=3702 GN=ChiC PE=1 SV=1	G	Carbohydrate transport and metabolism	glycoside hydrolase family 18 protein [Medicago truncatula]	molecular function: catalytic activity (GO:0003824);; cellular component: extracellular region (GO:0005576);; biological process: metabolic process (GO:0008152);; molecular function: binding (GO:0005488)	Amino sugar and nucleotide sugar metabolism (ko00520)
Medtr1g030580.JCVIMt4.0v1	c41899.graph_c0	608	116.61	156.67	30.45	8.69e-42	up	1.91576	--	--	Biological Process: amino acid transmembrane transport (GO:0003333);; Cellular Component: plasma membrane (GO:0005886);; Molecular Function: amino acid transmembrane transporter activity (GO:0015171);; Cellular Component: integral component of membrane (GO:0016021);; Biological Process: amino acid export (GO:0032973);; Biological Process: amino acid import (GO:0043090);; Biological Process: amino…	--	--	--	EamA-like transporter family	WAT1-related protein At4g08300 OS=Arabidopsis thaliana OX=3702 GN=At4g08300 PE=2 SV=1	S	Function unknown	unknown, partial [Medicago truncatula]	biological process: single-organism process (GO:0044699);; biological process: localization (GO:0051179);; cellular component: cell (GO:0005623);; cellular component: membrane (GO:0016020);; cellular component: cell part (GO:0044464);; molecular function: transporter activity (GO:0005215);; cellular component: membrane part (GO:0044425);; biological process: biological regulation (GO:0065007)	--
Medtr2g041550.JCVIMt4.0v1	c34782.graph_c0	1592	96.24	424.67	24.77	6.07e-35	up	1.90596	[G]	Carbohydrate transport and metabolism	Cellular Component: extracellular region (GO:0005576);; Cellular Component: cell wall (GO:0005618);; Molecular Function: manganese ion binding (GO:0030145);; Biological Process: oxalate metabolic process (GO:0033609);; Molecular Function: nutrient reservoir activity (GO:0045735);; Molecular Function: oxalate decarboxylase activity (GO:0046564);;	--	--	--	Cupin;; Cupin domain	Auxin-binding protein ABP19a OS=Prunus persica OX=3760 GN=ABP19A PE=3 SV=1	S	Function unknown	auxin-binding protein ABP19a [Medicago truncatula]	cellular component: extracellular region (GO:0005576);; cellular component: cell (GO:0005623);; cellular component: cell part (GO:0044464);; molecular function: binding (GO:0005488);; biological process: metabolic process (GO:0008152);; biological process: cellular process (GO:0009987);; biological process: single-organism process (GO:0044699);; molecular function: nutrient reservoir activity (GO…	--
Medtr7g051170.JCVIMt4.0v1	c41465.graph_c0	33.67	2.26	5	0.36	2.44e-05	up	1.90592	--	--	--	--	--	--	--	--	--	--	hypothetical protein MTR_5g053850 [Medicago truncatula]	--	--
Medtr7g105730.JCVIMt4.0v1	c25842.graph_c0	65.67	5.82	14.33	1.26	2.26e-08	up	1.90286	--	--	--	--	--	--	--	--	S	Function unknown	hypothetical protein MTR_7g105730 [Medicago truncatula]	--	--
Medtr7g074090.JCVIMt4.0v1	c46662.graph_c0	1033.67	34.8	277	9.39	1.45e-47	up	1.90154	--	--	Cellular Component: integral component of membrane (GO:0016021);;	--	--	--	Protein RETICULATA-related	Protein RETICULATA-RELATED 3, chloroplastic OS=Arabidopsis thaliana OX=3702 GN=RER3 PE=1 SV=1	S	Function unknown	transmembrane protein, putative [Medicago truncatula]	cellular component: membrane (GO:0016020);; cellular component: membrane part (GO:0044425)	--
Medtr5g067460.JCVIMt4.0v1	c49061.graph_c0	87	2.32	20.33	0.53	2.25e-10	up	1.89435	[V]	Defense mechanisms	Biological Process: regulation of animal organ formation (GO:0003156);; Biological Process: drug transmembrane transport (GO:0006855);; Molecular Function: drug transmembrane transporter activity (GO:0015238);; Molecular Function: antiporter activity (GO:0015297);; Cellular Component: integral component of membrane (GO:0016021);; Cellular Component: Golgi transport complex (GO:0017119);; Biologic…	K03327|0|mtr:MTR_5g067460|K03327 multidrug resistance protein, MATE family | (RefSeq) MATE efflux family protein	[R]	General function prediction only	MatE	Protein DETOXIFICATION 48 OS=Arabidopsis thaliana OX=3702 GN=DTX48 PE=2 SV=1	V	Defense mechanisms	multidrug and toxin extrusion 55 [Medicago truncatula]	biological process: biological regulation (GO:0065007);; biological process: single-organism process (GO:0044699);; biological process: response to stimulus (GO:0050896);; biological process: localization (GO:0051179);; molecular function: transporter activity (GO:0005215);; cellular component: membrane (GO:0016020);; cellular component: membrane part (GO:0044425);; cellular component: cell (GO:0…	--
Medtr7g069500.JCVIMt4.0v1	c48366.graph_c1	72	8.34	15	1.83	2.4e-07	up	1.89281	[GHR]	Carbohydrate transport and metabolism ;; Coenzyme transport and metabolism ;; General function prediction only	Molecular Function: magnesium ion binding (GO:0000287);; Molecular Function: pyruvate decarboxylase activity (GO:0004737);; Molecular Function: thiamine pyrophosphate binding (GO:0030976);;	K01568|7.51638e-49|mtr:MTR_7g069500|K01568 pyruvate decarboxylase [EC:4.1.1.1] | (RefSeq) pyruvate decarboxylase	[EH]	--	Thiamine pyrophosphate enzyme, N-terminal TPP binding domain	Pyruvate decarboxylase 1 OS=Arabidopsis thaliana OX=3702 GN=PDC1 PE=2 SV=1	GH	--	pyruvate decarboxylase [Medicago truncatula]	molecular function: binding (GO:0005488);; molecular function: catalytic activity (GO:0003824)	Glycolysis / Gluconeogenesis (ko00010)
--	c36532.graph_c0	45.67	3.35	9	0.65	1.33e-06	up	1.8916	--	--	--	--	--	--	--	--	--	--	--	--	--
--	c43871.graph_c0	35.33	0.78	6	0.21	1.5e-05	up	1.88824	--	--	Cellular Component: mitochondrion (GO:0005739);; Cellular Component: membrane (GO:0016020);;	--	[R]	General function prediction only	Cauliflower mosaic virus peptidase (A3);; Reverse transcriptase (RNA-dependent DNA polymerase);; Zinc knuckle	RNA-directed DNA polymerase homolog OS=Oenothera berteroana OX=3950 PE=4 SV=1	L	Replication, recombination and repair	Enzymatic polyprotein [Cajanus cajan]	cellular component: cell (GO:0005623);; cellular component: organelle (GO:0043226);; cellular component: cell part (GO:0044464);; cellular component: membrane (GO:0016020)	--
Medtr5g098170.JCVIMt4.0v1	c46108.graph_c1	151	7.03	34.33	1.66	1.33e-10	up	1.88688	[H]	Coenzyme transport and metabolism	Cellular Component: cytosol (GO:0005829);; Biological Process: aromatic compound biosynthetic process (GO:0019438);; Molecular Function: quercetin 3-O-methyltransferase activity (GO:0030755);; Biological Process: methylation (GO:0032259);; Molecular Function: protein dimerization activity (GO:0046983);; Molecular Function: caffeate O-methyltransferase activity (GO:0047763);;	K13066|0|mtr:MTR_5g098170|K13066 caffeic acid 3-O-methyltransferase [EC:2.1.1.68] | (RefSeq) caffeic acid O-methyltransferase	[R]	General function prediction only	O-methyltransferase;; Dimerisation domain	Caffeic acid 3-O-methyltransferase 1 OS=Populus tremuloides OX=3693 GN=OMT1 PE=1 SV=1	S	Function unknown	caffeic acid O-methyltransferase [Medicago truncatula]	cellular component: cell (GO:0005623);; cellular component: cell part (GO:0044464);; biological process: metabolic process (GO:0008152);; biological process: cellular process (GO:0009987);; molecular function: catalytic activity (GO:0003824);; molecular function: binding (GO:0005488)	Phenylpropanoid biosynthesis (ko00940)
Medtr7g086430.JCVIMt4.0v1	c42216.graph_c0	2661.33	77.75	724.33	20.68	9.42e-102	up	1.88198	[O]	Posttranslational modification, protein turnover, chaperones	Molecular Function: metalloendopeptidase activity (GO:0004222);; Biological Process: proteolysis (GO:0006508);; Cellular Component: chloroplast (GO:0009507);; Biological Process: chloroplast organization (GO:0009658);; Biological Process: negative gravitropism (GO:0009959);; Biological Process: thylakoid membrane organization (GO:0010027);; Biological Process: photosystem II assembly (GO:0010207)…	--	--	--	Peptidase family M50	Probable zinc metalloprotease EGY1, chloroplastic OS=Arabidopsis thaliana OX=3702 GN=EGY1 PE=2 SV=1	M	Cell wall/membrane/envelope biogenesis	M50 family peptidase [Medicago truncatula]	biological process: metabolic process (GO:0008152);; molecular function: catalytic activity (GO:0003824);; cellular component: cell (GO:0005623);; cellular component: organelle (GO:0043226);; cellular component: cell part (GO:0044464);; biological process: cellular process (GO:0009987);; biological process: cellular component organization or biogenesis (GO:0071840);; biological process: response …	--
Medtr8g026960.JCVIMt4.0v1	c51398.graph_c0	257.67	11.16	64.33	2.9	3.95e-17	up	1.87203	--	--	Molecular Function: transcription factor activity, sequence-specific DNA binding (GO:0003700);; Cellular Component: nucleus (GO:0005634);; Biological Process: regulation of transcription, DNA-templated (GO:0006355);; Molecular Function: sequence-specific DNA binding (GO:0043565);;	K09338|2.83101e-73|mtr:MTR_8g026960|K09338 homeobox-leucine zipper protein | (RefSeq) homeobox associated leucine zipper protein	[K]	Transcription	Homeobox associated leucine zipper;; Homeobox domain	Homeobox-leucine zipper protein ATHB-12 OS=Arabidopsis thaliana OX=3702 GN=ATHB-12 PE=1 SV=1	K	Transcription	homeobox-leucine zipper protein [Medicago sativa]	biological process: biological regulation (GO:0065007);; molecular function: nucleic acid binding transcription factor activity (GO:0001071);; cellular component: cell (GO:0005623);; cellular component: organelle (GO:0043226);; cellular component: cell part (GO:0044464);; molecular function: binding (GO:0005488)	--
Medtr8g089830.JCVIMt4.0v1	c30615.graph_c0	1285.33	71.87	349.67	19.22	1.65e-56	up	1.87046	--	--	--	--	--	--	--	--	--	--	hypothetical protein MTR_8g089830 [Medicago truncatula]	--	--
Medtr1g492730.JCVIMt4.0v1	c40123.graph_c0	1234.67	45.29	334	12.16	2.1e-64	up	1.86869	--	--	Biological Process: proteolysis (GO:0006508);; Molecular Function: peptidase activity (GO:0008233);;	--	[TO]	--	--	OTU domain-containing protein At3g57810 OS=Arabidopsis thaliana OX=3702 GN=At3g57810 PE=2 SV=1	O	Posttranslational modification, protein turnover, chaperones	OTU-like cysteine protease [Medicago truncatula]	biological process: metabolic process (GO:0008152);; molecular function: catalytic activity (GO:0003824)	--
Medtr4g029620.JCVIMt4.0v1	c33254.graph_c0	43.33	9.2	9	1.53	2.22e-06	up	1.86322	--	--	--	--	--	--	Extensin-like protein repeat	--	--	--	hypothetical protein PHAVU_009G211300g, partial [Phaseolus vulgaris]	--	--
Medtr1g031690.JCVIMt4.0v1	c52848.graph_c0	816	11.87	220.33	3.26	9.7e-50	up	1.86055	[L]	Replication, recombination and repair	Molecular Function: DNA binding (GO:0003677);; Molecular Function: DNA topoisomerase type II (ATP-hydrolyzing) activity (GO:0003918);; Molecular Function: ATP binding (GO:0005524);; Cellular Component: chromosome (GO:0005694);; Biological Process: DNA topological change (GO:0006265);; Biological Process: DNA unwinding involved in DNA replication (GO:0006268);; Biological Process: chromosome segre…	K02469|0|mtr:MTR_1g031690|K02469 DNA gyrase subunit A [EC:5.99.1.3] | (RefSeq) DNA gyrase subunit A	[B]	Chromatin structure and dynamics	DNA gyrase/topoisomerase IV, subunit A;; DNA gyrase C-terminal domain, beta-propeller	DNA gyrase subunit A, chloroplastic/mitochondrial OS=Nicotiana benthamiana OX=4100 GN=GYRA PE=2 SV=1	L	Replication, recombination and repair	DNA gyrase subunit A [Medicago truncatula]	molecular function: binding (GO:0005488);; molecular function: catalytic activity (GO:0003824);; cellular component: cell (GO:0005623);; cellular component: organelle (GO:0043226);; cellular component: cell part (GO:0044464);; biological process: metabolic process (GO:0008152);; biological process: cellular process (GO:0009987);; biological process: cellular component organization or biogenesis (…	--
Medtr2g064295.JCVIMt4.0v1	c46391.graph_c0	24.67	0.94	3.67	0.14	6.46e-05	up	1.86026	--	--	Molecular Function: magnesium ion binding (GO:0000287);; Biological Process: metabolic process (GO:0008152);; Molecular Function: ent-kaurene synthase activity (GO:0009899);;	K04121|0|mtr:MTR_2g064295|K04121 ent-kaurene synthase [EC:4.2.3.19] | (RefSeq) Ent-kaurene synthase	--	--	Terpene synthase family, metal binding domain;; Terpene synthase, N-terminal domain	Ent-kaur-16-ene synthase, chloroplastic OS=Cucurbita maxima OX=3661 PE=1 SV=1	I	Lipid transport and metabolism	Ent-kaurene synthase [Medicago truncatula]	molecular function: binding (GO:0005488);; biological process: metabolic process (GO:0008152);; molecular function: catalytic activity (GO:0003824)	Diterpenoid biosynthesis (ko00904)
Medtr8g018690.JCVIMt4.0v1	c51508.graph_c0	10850.7	247.19	2970.67	67.45	1.25e-72	up	1.86009	--	--	Cellular Component: cytoplasm (GO:0005737);; Molecular Function: oxidoreductase activity, acting on single donors with incorporation of molecular oxygen, incorporation of two atoms of oxygen (GO:0016702);; Biological Process: oxylipin biosynthetic process (GO:0031408);; Molecular Function: metal ion binding (GO:0046872);; Biological Process: oxidation-reduction process (GO:0055114);;	K15718|0|mtr:MTR_8g018690|K15718 linoleate 9S-lipoxygenase [EC:1.13.11.58] | (RefSeq) seed linoleate 9S-lipoxygenase	--	--	Lipoxygenase;; Lipoxygenase;; PLAT/LH2 domain	Linoleate 9S-lipoxygenase OS=Lens culinaris OX=3864 GN=LOX1.1 PE=2 SV=1	S	Function unknown	seed linoleate 9S-lipoxygenase [Medicago truncatula]	cellular component: cell (GO:0005623);; cellular component: cell part (GO:0044464);; biological process: metabolic process (GO:0008152);; biological process: single-organism process (GO:0044699);; molecular function: catalytic activity (GO:0003824);; biological process: cellular process (GO:0009987);; molecular function: binding (GO:0005488)	Linoleic acid metabolism (ko00591)
Medtr6g027720.JCVIMt4.0v1	c49847.graph_c0	74.33	7.18	17	1.63	1.95e-08	up	1.85862	--	--	Molecular Function: protein kinase activity (GO:0004672);; Molecular Function: ATP binding (GO:0005524);; Biological Process: protein phosphorylation (GO:0006468);; Cellular Component: integral component of membrane (GO:0016021);; Molecular Function: oxidoreductase activity (GO:0016491);;	--	--	--	Leucine rich repeat N-terminal domain	Probable inactive leucine-rich repeat receptor-like protein kinase At3g03770 OS=Arabidopsis thaliana OX=3702 GN=At3g03770 PE=2 SV=1	T	Signal transduction mechanisms	LRR receptor-like kinase [Medicago truncatula]	biological process: metabolic process (GO:0008152);; biological process: cellular process (GO:0009987);; molecular function: catalytic activity (GO:0003824);; molecular function: binding (GO:0005488);; cellular component: membrane (GO:0016020);; cellular component: membrane part (GO:0044425);; biological process: single-organism process (GO:0044699)	--
Medtr8g096920.JCVIMt4.0v1	c23489.graph_c0	188.67	46.36	25.67	7.04	9.56e-05	up	1.85837	--	--	--	--	--	--	Thaumatin family	Thaumatin-like protein OS=Oryza sativa subsp. japonica OX=39947 GN=Os12g0628600 PE=1 SV=1	S	Function unknown	thaumatin-like pathogenesis-related protein 4-like precursor, partial [Trifolium pratense]	--	--
Medtr5g021160.JCVIMt4.0v1	c42342.graph_c0	42	1.67	6.67	0.29	3.4e-05	up	1.8558	--	--	Cellular Component: integral component of membrane (GO:0016021);; Molecular Function: transmembrane transporter activity (GO:0022857);; Biological Process: transmembrane transport (GO:0055085);;	--	--	--	EamA-like transporter family	Protein WALLS ARE THIN 1 OS=Arabidopsis thaliana OX=3702 GN=WAT1 PE=1 SV=1	--	--	nodulin MtN21/EamA-like transporter family protein [Medicago truncatula]	cellular component: membrane (GO:0016020);; cellular component: membrane part (GO:0044425);; biological process: localization (GO:0051179);; molecular function: transporter activity (GO:0005215)	--
Medtr3g110330.JCVIMt4.0v1	c37926.graph_c1	1365	93.31	377	25.29	5.36e-57	up	1.85127	[C]	Energy production and conversion	Molecular Function: malate dehydrogenase (decarboxylating) (NAD+) activity (GO:0004471);; Molecular Function: malate dehydrogenase (decarboxylating) (NADP+) activity (GO:0004473);; Cellular Component: cytoplasm (GO:0005737);; Biological Process: malate metabolic process (GO:0006108);; Molecular Function: oxaloacetate decarboxylase activity (GO:0008948);; Molecular Function: metal ion binding (GO:…	K00029|0|mtr:MTR_3g110330|K00029 malate dehydrogenase (oxaloacetate-decarboxylating)(NADP+) [EC:1.1.1.40] | (RefSeq) NADP-dependent malic enzyme-like protein	[C]	Energy production and conversion	Malic enzyme, N-terminal domain	NADP-dependent malic enzyme OS=Phaseolus vulgaris OX=3885 GN=ME1 PE=2 SV=1	C	Energy production and conversion	NADP-dependent malic enzyme-like protein [Medicago truncatula]	biological process: metabolic process (GO:0008152);; biological process: single-organism process (GO:0044699);; molecular function: catalytic activity (GO:0003824);; cellular component: cell (GO:0005623);; cellular component: cell part (GO:0044464);; biological process: cellular process (GO:0009987);; molecular function: binding (GO:0005488)	Pyruvate metabolism (ko00620);; Carbon fixation in photosynthetic organisms (ko00710);; Carbon metabolism (ko01200)
--	c39918.graph_c0	55.33	1.75	11	0.36	1.77e-06	up	1.85068	--	--	--	--	--	--	--	--	S	Function unknown	Retrovirus-related Pol polyprotein from transposon TNT 1-94 [Cajanus cajan]	--	--
Medtr2g100900.JCVIMt4.0v1	c37582.graph_c0	214	16.41	56.33	4.2	8.29e-17	up	1.84924	--	--	Biological Process: phosphorelay signal transduction system (GO:0000160);; Cellular Component: nucleus (GO:0005634);; Cellular Component: cytoplasm (GO:0005737);; Biological Process: cytokinin-activated signaling pathway (GO:0009736);; Molecular Function: histidine phosphotransfer kinase activity (GO:0009927);; Cellular Component: integral component of membrane (GO:0016021);; Biological Process: …	K14490|1.83987e-104|mtr:MTR_2g100880|K14490 histidine-containing phosphotransfer peotein | (RefSeq) histidine phosphotransfer protein	[T]	Signal transduction mechanisms	Hpt domain	Pseudo histidine-containing phosphotransfer protein 5 OS=Oryza sativa subsp. japonica OX=39947 GN=PHP5 PE=2 SV=1	T	Signal transduction mechanisms	histidine phosphotransfer protein [Medicago truncatula]	biological process: cellular process (GO:0009987);; biological process: signaling (GO:0023052);; biological process: single-organism process (GO:0044699);; biological process: response to stimulus (GO:0050896);; biological process: biological regulation (GO:0065007);; cellular component: cell (GO:0005623);; cellular component: organelle (GO:0043226);; cellular component: cell part (GO:0044464);; …	Plant hormone signal transduction (ko04075)
Medtr7g069540.JCVIMt4.0v1	c48366.graph_c0	455.33	12.42	123.33	3.46	4.27e-34	up	1.84818	[GHR]	Carbohydrate transport and metabolism ;; Coenzyme transport and metabolism ;; General function prediction only	Molecular Function: magnesium ion binding (GO:0000287);; Molecular Function: pyruvate decarboxylase activity (GO:0004737);; Molecular Function: thiamine pyrophosphate binding (GO:0030976);;	K01568|0|mtr:MTR_4g017200|K01568 pyruvate decarboxylase [EC:4.1.1.1] | (RefSeq) pyruvate decarboxylase	[EH]	--	Thiamine pyrophosphate enzyme, N-terminal TPP binding domain;; Thiamine pyrophosphate enzyme, central domain;; Thiamine pyrophosphate enzyme, C-terminal TPP binding domain	Pyruvate decarboxylase 2 OS=Arabidopsis thaliana OX=3702 GN=PDC2 PE=2 SV=1	GH	--	pyruvate decarboxylase [Trifolium pratense]	molecular function: binding (GO:0005488);; molecular function: catalytic activity (GO:0003824)	Glycolysis / Gluconeogenesis (ko00010)
Medtr2g102267.JCVIMt4.0v1	c37913.graph_c0	1404.33	56.08	291.67	11.92	1.14e-06	up	1.84645	[K]	Transcription	Biological Process: intracellular protein transport (GO:0006886);; Biological Process: ER to Golgi vesicle-mediated transport (GO:0006888);; Biological Process: retrograde vesicle-mediated transport, Golgi to ER (GO:0006890);; Biological Process: intra-Golgi vesicle-mediated transport (GO:0006891);; Cellular Component: COPI vesicle coat (GO:0030126);;	K17302|0|mtr:MTR_2g102267|K17302 coatomer subunit beta' | (RefSeq) coatomer subunit beta-like protein	[U]	Intracellular trafficking, secretion, and vesicular transport	WD domain, G-beta repeat;; Anaphase-promoting complex subunit 4 WD40 domain;; Ciliary BBSome complex subunit 2, middle region	Coatomer subunit beta&apos;-1 OS=Arabidopsis thaliana OX=3702 GN=At1g79990 PE=2 SV=2	S	Function unknown	coatomer subunit beta-like protein [Medicago truncatula]	biological process: localization (GO:0051179);; cellular component: cell (GO:0005623);; cellular component: membrane (GO:0016020);; cellular component: macromolecular complex (GO:0032991);; cellular component: organelle (GO:0043226);; cellular component: organelle part (GO:0044422);; cellular component: membrane part (GO:0044425);; cellular component: cell part (GO:0044464)	--
--	c53794.graph_c0	35.67	2.54	7	0.47	1.14e-05	up	1.84215	--	--	--	--	--	--	--	--	--	--	PREDICTED: uncharacterized protein LOC101488812 [Cicer arietinum]	--	--
Medtr3g450850.JCVIMt4.0v1	c48613.graph_c0	149.67	7.39	38.67	1.87	2.47e-15	up	1.84079	--	--	--	--	[R]	General function prediction only	--	Retrovirus-related Pol polyprotein from transposon RE1 OS=Arabidopsis thaliana OX=3702 GN=RE1 PE=2 SV=1	S	Function unknown	retrovirus-related Pol polyprotein from transposon TNT 1-94, partial [Trifolium pratense]	--	--
Medtr3g013500.JCVIMt4.0v1	c42308.graph_c0	159.33	7.16	36	1.69	1.45e-08	up	1.83213	--	--	Molecular Function: sulfotransferase activity (GO:0008146);;	--	[R]	General function prediction only	Sulfotransferase domain;; Sulfotransferase family	Cytosolic sulfotransferase 15 OS=Arabidopsis thaliana OX=3702 GN=SOT15 PE=1 SV=1	S	Function unknown	sulfotransferase [Medicago truncatula]	molecular function: catalytic activity (GO:0003824)	--
Medtr1g075490.JCVIMt4.0v1	c28194.graph_c0	133.67	24.55	34.33	6.08	5.37e-12	up	1.8316	--	--	--	--	--	--	--	--	--	--	--	--	--
Medtr1g034300.JCVIMt4.0v1	c53022.graph_c0	806.33	16.59	138.33	3.02	3.17e-05	up	1.83028	--	--	Molecular Function: GTPase activity (GO:0003924);; Molecular Function: signal transducer activity (GO:0004871);; Molecular Function: GTP binding (GO:0005525);; Cellular Component: nucleus (GO:0005634);; Biological Process: G-protein coupled receptor signaling pathway (GO:0007186);; Molecular Function: G-protein beta/gamma-subunit complex binding (GO:0031683);; Biological Process: defense response…	--	[DT]	--	G-protein alpha subunit;; G-protein alpha subunit	Extra-large guanine nucleotide-binding protein 1 OS=Arabidopsis thaliana OX=3702 GN=XLG1 PE=1 SV=2	S	Function unknown	extra-large GTP-binding protein [Medicago truncatula]	molecular function: catalytic activity (GO:0003824);; biological process: cellular process (GO:0009987);; biological process: signaling (GO:0023052);; biological process: single-organism process (GO:0044699);; biological process: response to stimulus (GO:0050896);; biological process: biological regulation (GO:0065007);; molecular function: signal transducer activity (GO:0004871);; molecular func…	--
Medtr7g108650.JCVIMt4.0v1	c33565.graph_c0	1053	37.61	281	10.07	3.87e-27	up	1.82948	--	--	Cellular Component: endoplasmic reticulum (GO:0005783);; Cellular Component: Golgi stack (GO:0005795);; Biological Process: porphyrin-containing compound metabolic process (GO:0006778);; Cellular Component: integral component of membrane (GO:0016021);; Molecular Function: heme binding (GO:0020037);;	K05770|2.07578e-72|mtr:MTR_7g108650|K05770 benzodiazapine receptor | (RefSeq) TSPO/MBR family protein	--	--	TspO/MBR family	Translocator protein homolog OS=Arabidopsis thaliana OX=3702 GN=TSPO PE=1 SV=1	U	Intracellular trafficking, secretion, and vesicular transport	TSPO/MBR family protein [Medicago truncatula]	cellular component: cell (GO:0005623);; cellular component: organelle (GO:0043226);; cellular component: cell part (GO:0044464);; cellular component: organelle part (GO:0044422);; biological process: metabolic process (GO:0008152);; biological process: cellular process (GO:0009987);; cellular component: membrane (GO:0016020);; cellular component: membrane part (GO:0044425);; molecular function: b…	--
Medtr1g029550.JCVIMt4.0v1	c43561.graph_c0	550.67	25.49	145.33	6.79	2.2e-24	up	1.82801	--	--	--	--	--	--	--	--	S	Function unknown	hypothetical protein MTR_1g029550 [Medicago truncatula]	--	--
Medtr4g094340.JCVIMt4.0v1	c40379.graph_c0	182.33	6.99	30.33	1.2	5.62e-05	up	1.82166	--	--	Cellular Component: plasma membrane (GO:0005886);; Cellular Component: integral component of membrane (GO:0016021);; Molecular Function: transmembrane transporter activity (GO:0022857);; Biological Process: transmembrane transport (GO:0055085);;	--	--	--	EamA-like transporter family	WAT1-related protein At1g25270 OS=Arabidopsis thaliana OX=3702 GN=At1g25270 PE=2 SV=1	S	Function unknown	auxin-induced 5NG4-like protein [Medicago truncatula]	cellular component: cell (GO:0005623);; cellular component: membrane (GO:0016020);; cellular component: cell part (GO:0044464);; cellular component: membrane part (GO:0044425);; biological process: localization (GO:0051179);; molecular function: transporter activity (GO:0005215)	--
Medtr2g029860.JCVIMt4.0v1	c43429.graph_c1	661.33	73.47	175	18.05	1.29e-21	up	1.82159	--	--	Molecular Function: peroxidase activity (GO:0004601);; Cellular Component: extracellular region (GO:0005576);; Biological Process: response to oxidative stress (GO:0006979);; Molecular Function: heme binding (GO:0020037);; Biological Process: hydrogen peroxide catabolic process (GO:0042744);; Molecular Function: metal ion binding (GO:0046872);; Biological Process: oxidation-reduction process (GO:…	K00430|7.20913e-117|mtr:MTR_2g029860|K00430 peroxidase [EC:1.11.1.7] | (RefSeq) peroxidase family protein	--	--	Peroxidase	Peroxidase 15 OS=Ipomoea batatas OX=4120 GN=pod PE=1 SV=1	--	--	peroxidase1A [Medicago sativa]	biological process: metabolic process (GO:0008152);; biological process: cellular process (GO:0009987);; biological process: single-organism process (GO:0044699);; biological process: response to stimulus (GO:0050896);; biological process: detoxification (GO:0098754);; molecular function: catalytic activity (GO:0003824);; molecular function: antioxidant activity (GO:0016209);; cellular component:…	Phenylpropanoid biosynthesis (ko00940)
Medtr8g010320.JCVIMt4.0v1	c41035.graph_c0	438	73.52	118.33	17.87	3.13e-24	up	1.82132	--	--	Biological Process: defense response (GO:0006952);;	--	--	--	--	Nodulin-1 OS=Medicago truncatula OX=3880 GN=N1 PE=2 SV=1	--	--	Defensin-like protein [Medicago truncatula]	biological process: response to stimulus (GO:0050896)	--
--	c43823.graph_c0	4154.33	1305.19	1144.67	598.54	3.79e-50	up	1.81557	--	--	--	--	--	--	--	--	--	--	--	--	--
Medtr6g037000.JCVIMt4.0v1	c45539.graph_c1	40.67	3.84	8.33	0.84	1.19e-05	up	1.80726	--	--	Molecular Function: nucleic acid binding (GO:0003676);; Cellular Component: integral component of membrane (GO:0016021);;	--	--	--	Protein BYPASS1-related	--	S	Function unknown	plant/F1M20-13 protein [Medicago truncatula]	molecular function: binding (GO:0005488);; cellular component: membrane (GO:0016020);; cellular component: membrane part (GO:0044425)	--
Medtr4g016760.JCVIMt4.0v1	c52158.graph_c0	89	2.48	21.33	0.56	6.87e-09	up	1.80584	--	--	--	--	[R]	General function prediction only	--	--	S	Function unknown	hypothetical protein TSUD_59840 [Trifolium subterraneum]	--	--
Medtr2g088100.JCVIMt4.0v1	c42053.graph_c0	197.67	16.12	54	4.34	6.56e-18	up	1.80157	--	--	Cellular Component: membrane (GO:0016020);;	--	--	--	--	--	--	--	hypothetical protein MTR_2g088100 [Medicago truncatula]	cellular component: membrane (GO:0016020)	--
Medtr5g032060.JCVIMt4.0v1	c46903.graph_c1	147.67	2.08	37.67	0.53	6.85e-12	up	1.79811	--	--	Molecular Function: actin binding (GO:0003779);; Molecular Function: kinase activity (GO:0016301);; Biological Process: phosphorylation (GO:0016310);;	--	--	--	KIP1-like protein	Protein NETWORKED 2D OS=Arabidopsis thaliana OX=3702 GN=NET2D PE=3 SV=1	S	Function unknown	kinase interacting (KIP1-like) family protein [Medicago truncatula]	molecular function: binding (GO:0005488);; biological process: metabolic process (GO:0008152);; biological process: cellular process (GO:0009987);; molecular function: catalytic activity (GO:0003824)	--
Medtr1g027050.JCVIMt4.0v1	c42192.graph_c1	36.33	5.1	7	0.97	3.01e-05	up	1.78771	--	--	Molecular Function: protein serine/threonine kinase activity (GO:0004674);; Molecular Function: ATP binding (GO:0005524);; Biological Process: protein phosphorylation (GO:0006468);; Molecular Function: polysaccharide binding (GO:0030247);;	K04733|1.50273e-73|mtr:MTR_1g027050|K04733 interleukin-1 receptor-associated kinase 4 [EC:2.7.11.1] | (RefSeq) stress-induced receptor-like kinase	[T]	Signal transduction mechanisms	Protein tyrosine kinase	Rust resistance kinase Lr10 OS=Triticum aestivum OX=4565 GN=LRK10 PE=2 SV=1	--	--	stress-induced receptor-like kinase [Medicago truncatula]	biological process: metabolic process (GO:0008152);; biological process: cellular process (GO:0009987);; molecular function: catalytic activity (GO:0003824);; molecular function: binding (GO:0005488)	--
Medtr4g094492.JCVIMt4.0v1	c47530.graph_c0	484.33	14.91	108.33	3.4	2.05e-06	up	1.78682	[C]	Energy production and conversion	Molecular Function: oxidoreductase activity, acting on CH-OH group of donors (GO:0016614);; Molecular Function: flavin adenine dinucleotide binding (GO:0050660);; Biological Process: oxidation-reduction process (GO:0055114);;	--	--	--	FAD binding domain;; Berberine and berberine like	Berberine bridge enzyme-like 15 OS=Arabidopsis thaliana OX=3702 GN=MEE23 PE=1 SV=1	C	Energy production and conversion	reticuline oxidase-like protein [Medicago truncatula]	biological process: metabolic process (GO:0008152);; biological process: single-organism process (GO:0044699);; molecular function: catalytic activity (GO:0003824);; molecular function: binding (GO:0005488)	--
Medtr4g124320.JCVIMt4.0v1	c39278.graph_c0	140	3.92	36.67	1.01	7.71e-11	up	1.78139	--	--	Molecular Function: hydrolase activity (GO:0016787);;	K19882|0|mtr:MTR_4g124320|K19882 O-palmitoleoyl-L-serine hydrolase [EC:3.1.1.98] | (RefSeq) pectinacetylesterase family protein	[M]	Cell wall/membrane/envelope biogenesis	Pectinacetylesterase;; Pectinacetylesterase	Pectin acetylesterase 10 OS=Arabidopsis thaliana OX=3702 GN=PAE10 PE=2 SV=1	S	Function unknown	pectinacetylesterase family protein [Medicago truncatula]	molecular function: catalytic activity (GO:0003824)	--
Medtr2g029830.JCVIMt4.0v1	c46406.graph_c0	7855.33	401.55	2093	105.06	2.16e-14	up	1.77983	--	--	Molecular Function: peroxidase activity (GO:0004601);; Cellular Component: extracellular region (GO:0005576);; Biological Process: response to oxidative stress (GO:0006979);; Molecular Function: heme binding (GO:0020037);; Biological Process: hydrogen peroxide catabolic process (GO:0042744);; Molecular Function: metal ion binding (GO:0046872);; Biological Process: oxidation-reduction process (GO:…	K00430|0|mtr:MTR_2g029830|K00430 peroxidase [EC:1.11.1.7] | (RefSeq) peroxidase family protein	--	--	Peroxidase	Peroxidase 15 OS=Ipomoea batatas OX=4120 GN=pod PE=1 SV=1	--	--	peroxidase family protein [Medicago truncatula]	biological process: metabolic process (GO:0008152);; biological process: cellular process (GO:0009987);; biological process: single-organism process (GO:0044699);; biological process: response to stimulus (GO:0050896);; biological process: detoxification (GO:0098754);; molecular function: catalytic activity (GO:0003824);; molecular function: antioxidant activity (GO:0016209);; cellular component:…	Phenylpropanoid biosynthesis (ko00940)
Medtr2g076490.JCVIMt4.0v1	c51269.graph_c0	85.33	5.21	21.33	1.43	6.44e-08	up	1.77567	--	--	Cellular Component: integral component of membrane (GO:0016021);;	--	--	--	D-mannose binding lectin;; PAN-like domain	EP1-like glycoprotein 4 OS=Arabidopsis thaliana OX=3702 GN=At1g78860 PE=3 SV=1	S	Function unknown	unknown [Medicago truncatula]	cellular component: membrane (GO:0016020);; cellular component: membrane part (GO:0044425)	--
Medtr1g084720.JCVIMt4.0v1	c40149.graph_c0	725.33	29.33	210.67	8.22	2.17e-37	up	1.77561	[V]	Defense mechanisms	Molecular Function: ATP binding (GO:0005524);; Molecular Function: ATPase activity (GO:0016887);;	K12608|0|mtr:MTR_1g084720|K12608 CCR4-NOT complex subunit CAF16 | (RefSeq) ABC transporter I family protein	[RK]	--	ABC transporter;; AAA domain, putative AbiEii toxin, Type IV TA system	ABC transporter I family member 20 OS=Arabidopsis thaliana OX=3702 GN=ABCI20 PE=2 SV=1	S	Function unknown	ABC transporter I family protein [Medicago truncatula]	molecular function: binding (GO:0005488);; molecular function: catalytic activity (GO:0003824)	RNA degradation (ko03018)
Medtr8g006865.JCVIMt4.0v1	c27904.graph_c0	22	2.62	3.33	0.39	0.000209662	up	1.77345	--	--	--	--	--	--	--	--	--	--	--	--	--
Medtr3g118390.JCVIMt4.0v1	c40463.graph_c0	1552	74.55	177	9.06	0.000445145	up	1.76881	[G]	Carbohydrate transport and metabolism	Biological Process: polysaccharide catabolic process (GO:0000272);; Molecular Function: chitinase activity (GO:0004568);; Cellular Component: vacuole (GO:0005773);; Biological Process: chitin catabolic process (GO:0006032);; Biological Process: defense response (GO:0006952);; Molecular Function: chitin binding (GO:0008061);; Cellular Component: integral component of membrane (GO:0016021);; Biolog…	K20547|0|mtr:MTR_3g118390|K20547 basic endochitinase B [EC:3.2.1.14] | (RefSeq) Chitinase (Class I) / Hevein	[R]	General function prediction only	Chitinase class I;; Chitin recognition protein	Endochitinase A2 OS=Pisum sativum OX=3888 GN=CHI2 PE=1 SV=2	G	Carbohydrate transport and metabolism	class I chitinase [Medicago sativa]	biological process: metabolic process (GO:0008152);; molecular function: catalytic activity (GO:0003824);; cellular component: cell (GO:0005623);; cellular component: organelle (GO:0043226);; cellular component: cell part (GO:0044464);; biological process: response to stimulus (GO:0050896);; molecular function: binding (GO:0005488);; cellular component: membrane (GO:0016020);; cellular component:…	Amino sugar and nucleotide sugar metabolism (ko00520)
Medtr2g009450.JCVIMt4.0v1	c33228.graph_c0	46.67	5.68	10.67	1.26	3.58e-06	up	1.76773	--	--	--	--	--	--	--	--	--	--	--	--	--
--	c40083.graph_c0	84.67	7.09	19.67	1.66	6.57e-07	up	1.76716	--	--	--	--	--	--	--	--	--	--	--	--	--
Medtr2g035220.JCVIMt4.0v1	c47250.graph_c0	7472.33	620.22	1153.33	101.16	0.000263081	up	1.75201	--	--	Biological Process: defense response (GO:0006952);; Biological Process: response to biotic stimulus (GO:0009607);; Molecular Function: hydrolase activity (GO:0016787);;	--	--	--	--	ABA-responsive protein ABR17 OS=Pisum sativum OX=3888 PE=2 SV=1	--	--	ABA-responsive protein [Medicago truncatula]	biological process: response to stimulus (GO:0050896);; molecular function: catalytic activity (GO:0003824)	--
Medtr4g068510.JCVIMt4.0v1	c42469.graph_c0	3543.33	244.03	1041.67	70.41	1.08e-75	up	1.75176	--	--	Cellular Component: integral component of membrane (GO:0016021);;	--	--	--	Cold acclimation protein WCOR413	Cold-regulated 413 plasma membrane protein 2 OS=Arabidopsis thaliana OX=3702 GN=COR413PM2 PE=2 SV=1	S	Function unknown	cold acclimation protein WCOR413 [Medicago truncatula]	cellular component: membrane (GO:0016020);; cellular component: membrane part (GO:0044425)	--
Medtr3g015430.JCVIMt4.0v1	c38015.graph_c0	68.67	12.38	16	3.08	9.75e-07	up	1.75111	--	--	Cellular Component: integral component of membrane (GO:0016021);;	--	--	--	--	--	--	--	transmembrane protein, putative [Medicago truncatula]	cellular component: membrane (GO:0016020);; cellular component: membrane part (GO:0044425)	--
Medtr6g005600.JCVIMt4.0v1	c30913.graph_c0	44.67	3.54	10	0.8	7.1e-06	up	1.75105	--	--	Biological Process: flavonoid biosynthetic process (GO:0009813);; Cellular Component: intracellular membrane-bounded organelle (GO:0043231);; Biological Process: flavonoid glucuronidation (GO:0052696);; Molecular Function: quercetin 3-O-glucosyltransferase activity (GO:0080043);; Molecular Function: quercetin 7-O-glucosyltransferase activity (GO:0080044);;	K08237|0|mtr:MTR_6g005600|K08237 hydroquinone glucosyltransferase [EC:2.4.1.218] | (RefSeq) UDP-glucosyltransferase family protein	[GC]	--	--	Hydroquinone glucosyltransferase OS=Rauvolfia serpentina OX=4060 GN=AS PE=1 SV=1	S	Function unknown	UDP-glucosyltransferase family protein [Medicago truncatula]	biological process: metabolic process (GO:0008152);; cellular component: cell (GO:0005623);; cellular component: organelle (GO:0043226);; cellular component: cell part (GO:0044464);; biological process: cellular process (GO:0009987);; biological process: single-organism process (GO:0044699);; molecular function: catalytic activity (GO:0003824)	--
Medtr7g109560.JCVIMt4.0v1	c36076.graph_c0	66	3.05	15.67	0.74	6.5e-07	up	1.74788	[R]	General function prediction only	Biological Process: regulation of gene expression by genetic imprinting (GO:0006349);; Molecular Function: methyltransferase activity (GO:0008168);; Cellular Component: PcG protein complex (GO:0031519);; Biological Process: methylation (GO:0032259);; Molecular Function: sequence-specific DNA binding (GO:0043565);; Biological Process: negative regulation of transcription, DNA-templated (GO:0045892…	K11430|0|mtr:MTR_7g109560|K11430 histone-lysine N-methyltransferase EZH2 [EC:2.1.1.43] | (RefSeq) histone-lysine N-methyltransferase	[K]	Transcription	SET domain	Histone-lysine N-methyltransferase EZA1 OS=Arabidopsis thaliana OX=3702 GN=EZA1 PE=1 SV=1	S	Function unknown	histone-lysine N-methyltransferase [Medicago truncatula]	biological process: metabolic process (GO:0008152);; biological process: cellular process (GO:0009987);; biological process: biological regulation (GO:0065007);; molecular function: catalytic activity (GO:0003824);; cellular component: cell (GO:0005623);; cellular component: macromolecular complex (GO:0032991);; cellular component: organelle (GO:0043226);; cellular component: organelle part (GO:0…	--
Medtr8g042820.JCVIMt4.0v1	c52886.graph_c0	148.33	3.91	40	1.07	1.91e-12	up	1.74505	--	--	--	--	--	--	--	--	--	--	--	--	--
Medtr1g054635.JCVIMt4.0v1	c40761.graph_c0	32	1.03	6.33	0.22	6.16e-05	up	1.74393	[Q]	Secondary metabolites biosynthesis, transport and catabolism	Cellular Component: chloroplast (GO:0009507);; Biological Process: suberin biosynthetic process (GO:0010345);; Biological Process: pollen exine formation (GO:0010584);; Biological Process: long-chain fatty-acyl-CoA metabolic process (GO:0035336);; Biological Process: oxidation-reduction process (GO:0055114);; Molecular Function: fatty-acyl-CoA reductase (alcohol-forming) activity (GO:0080019);;	K13356|0|mtr:MTR_1g054635|K13356 alcohol-forming fatty acyl-CoA reductase [EC:1.2.1.84] | (RefSeq) fatty acyl-CoA reductase-like protein	[I]	Lipid transport and metabolism	Male sterility protein;; Male sterility protein;; NAD dependent epimerase/dehydratase family;; RmlD substrate binding domain	Fatty acyl-CoA reductase 2 OS=Arabidopsis thaliana OX=3702 GN=FAR2 PE=1 SV=2	S	Function unknown	fatty acyl-CoA reductase-like protein [Medicago truncatula]	cellular component: cell (GO:0005623);; cellular component: organelle (GO:0043226);; cellular component: cell part (GO:0044464);; biological process: metabolic process (GO:0008152);; biological process: cellular process (GO:0009987);; biological process: single-organism process (GO:0044699);; biological process: multicellular organismal process (GO:0032501);; biological process: developmental pro…	Cutin, suberine and wax biosynthesis (ko00073);; Peroxisome (ko04146)
Medtr4g016920.JCVIMt4.0v1	c52354.graph_c0	1251.67	37.7	367	10.74	4.67e-47	up	1.7435	[G]	Carbohydrate transport and metabolism	Biological Process: carbohydrate metabolic process (GO:0005975);; Molecular Function: beta-glucosidase activity (GO:0008422);; Molecular Function: scopolin beta-glucosidase activity (GO:0102483);; Biological Process: glycosyl compound metabolic process (GO:1901657);;	K01188|0|mtr:MTR_4g016920|K01188 beta-glucosidase [EC:3.2.1.21] | (RefSeq) glycoside hydrolase family 1 protein	[G]	Carbohydrate transport and metabolism	Glycosyl hydrolase family 1	Beta-glucosidase 11 OS=Arabidopsis thaliana OX=3702 GN=BGLU11 PE=2 SV=2	G	Carbohydrate transport and metabolism	glycoside hydrolase family 1 protein [Medicago truncatula]	biological process: metabolic process (GO:0008152);; molecular function: catalytic activity (GO:0003824);; biological process: single-organism process (GO:0044699)	Cyanoamino acid metabolism (ko00460);; Starch and sucrose metabolism (ko00500);; Phenylpropanoid biosynthesis (ko00940)
Medtr5g084790.JCVIMt4.0v1	c40341.graph_c0	3260.33	134.16	963	38.33	1.38e-33	up	1.73793	[IR]	Lipid transport and metabolism ;; General function prediction only	Molecular Function: hydrolase activity, acting on ester bonds (GO:0016788);; Molecular Function: 9,9'-dicis-carotene:quinone oxidoreductase activity (GO:0052886);; Molecular Function: 7,9,9'-tricis-neurosporene:quinone oxidoreductase activity (GO:0052887);; Biological Process: 9,9'-di-cis-zeta-carotene desaturation to 7,9,7',9'-tetra-cis-lycopene (GO:0052889);; Biological Process: oxidation-reduc…	--	--	--	GDSL-like Lipase/Acylhydrolase	GDSL esterase/lipase At2g04570 OS=Arabidopsis thaliana OX=3702 GN=At2g04570 PE=2 SV=1	S	Function unknown	GDSL-like lipase/acylhydrolase [Medicago truncatula]	molecular function: catalytic activity (GO:0003824);; biological process: metabolic process (GO:0008152);; biological process: single-organism process (GO:0044699);; biological process: cellular process (GO:0009987)	--
Medtr3g113660.JCVIMt4.0v1	c27873.graph_c0	536.33	26.49	160	7.62	5.03e-26	up	1.73622	--	--	--	--	--	--	--	--	--	--	hypothetical protein MTR_3g113660 [Medicago truncatula]	--	--
Medtr8g013610.JCVIMt4.0v1	c49873.graph_c1	145.33	4.52	38.67	1.22	6.23e-11	up	1.73617	--	--	Molecular Function: protein serine/threonine kinase activity (GO:0004674);; Molecular Function: ATP binding (GO:0005524);; Cellular Component: plasma membrane (GO:0005886);; Biological Process: protein phosphorylation (GO:0006468);; Cellular Component: plasmodesma (GO:0009506);; Cellular Component: integral component of membrane (GO:0016021);; Molecular Function: carbohydrate binding (GO:0030246)…	--	--	--	D-mannose binding lectin;; S-locus glycoprotein domain;; PAN-like domain;; Protein tyrosine kinase	G-type lectin S-receptor-like serine/threonine-protein kinase At1g11330 OS=Arabidopsis thaliana OX=3702 GN=At1g11330 PE=1 SV=3	T	Signal transduction mechanisms	G-type lectin S-receptor-like Serine/Threonine-kinase [Medicago truncatula]	biological process: metabolic process (GO:0008152);; biological process: cellular process (GO:0009987);; molecular function: catalytic activity (GO:0003824);; molecular function: binding (GO:0005488);; cellular component: cell (GO:0005623);; cellular component: membrane (GO:0016020);; cellular component: cell part (GO:0044464);; cellular component: cell junction (GO:0030054);; cellular component:…	--
Medtr7g102490.JCVIMt4.0v1	c45385.graph_c0	1807	55.4	537.33	16.42	3.46e-53	up	1.73521	--	--	Biological Process: flavonoid biosynthetic process (GO:0009813);; Cellular Component: intracellular membrane-bounded organelle (GO:0043231);; Biological Process: flavonoid glucuronidation (GO:0052696);; Molecular Function: quercetin 3-O-glucosyltransferase activity (GO:0080043);; Molecular Function: quercetin 7-O-glucosyltransferase activity (GO:0080044);;	K13496|0|mtr:MTR_7g102490|K13496 UDP-glucosyl transferase 73C [EC:2.4.1.-] | (RefSeq) UDP-glucosyltransferase family protein	[GC]	--	UDP-glucoronosyl and UDP-glucosyl transferase	UDP-glycosyltransferase 73C1 OS=Arabidopsis thaliana OX=3702 GN=UGT73C1 PE=2 SV=1	S	Function unknown	UDP-glucosyltransferase family protein [Medicago truncatula]	biological process: metabolic process (GO:0008152);; cellular component: cell (GO:0005623);; cellular component: organelle (GO:0043226);; cellular component: cell part (GO:0044464);; biological process: cellular process (GO:0009987);; biological process: single-organism process (GO:0044699);; molecular function: catalytic activity (GO:0003824)	--
Medtr5g018580.JCVIMt4.0v1	c43344.graph_c0	1208.67	64.62	358.67	19.01	1.72e-54	up	1.73411	[O]	Posttranslational modification, protein turnover, chaperones	Biological Process: sulfate assimilation (GO:0000103);; Biological Process: protein folding (GO:0006457);; Biological Process: glycerol ether metabolic process (GO:0006662);; Cellular Component: chloroplast thylakoid membrane (GO:0009535);; Biological Process: cytochrome b6f complex assembly (GO:0010190);; Molecular Function: protein disulfide oxidoreductase activity (GO:0015035);; Molecular Func…	--	[O]	Posttranslational modification, protein turnover, chaperones	Thioredoxin;; Thioredoxin-like;; Thioredoxin-like;; Thioredoxin-like domain;; AhpC/TSA family	Thioredoxin-like protein HCF164, chloroplastic OS=Arabidopsis thaliana OX=3702 GN=HCF164 PE=1 SV=2	O	Posttranslational modification, protein turnover, chaperones	thioredoxin-like protein [Medicago truncatula]	biological process: metabolic process (GO:0008152);; biological process: cellular process (GO:0009987);; biological process: single-organism process (GO:0044699);; cellular component: cell (GO:0005623);; cellular component: membrane (GO:0016020);; cellular component: organelle (GO:0043226);; cellular component: organelle part (GO:0044422);; cellular component: cell part (GO:0044464);; biological …	--
Medtr1g098490.JCVIMt4.0v1	c47521.graph_c1	40.67	1.06	8.33	0.23	4.61e-05	up	1.73287	--	--	--	--	--	--	--	--	--	--	--	--	--
Medtr1g036490.JCVIMt4.0v1	c51705.graph_c0	413	34.56	18	1.59	0.000721511	up	1.73154	[H]	Coenzyme transport and metabolism	Cellular Component: cytosol (GO:0005829);; Molecular Function: O-methyltransferase activity (GO:0008171);; Biological Process: aromatic compound biosynthetic process (GO:0019438);; Molecular Function: quercetin 3-O-methyltransferase activity (GO:0030755);; Biological Process: methylation (GO:0032259);; Molecular Function: protein dimerization activity (GO:0046983);;	K13066|8.7728e-159|mtr:MTR_1g036490|K13066 caffeic acid 3-O-methyltransferase [EC:2.1.1.68] | (RefSeq) caffeic acid O-methyltransferase	[R]	General function prediction only	O-methyltransferase	Isoliquiritigenin 2&apos;-O-methyltransferase OS=Medicago sativa OX=3879 PE=1 SV=1	S	Function unknown	caffeic acid O-methyltransferase [Medicago truncatula]	cellular component: cell (GO:0005623);; cellular component: cell part (GO:0044464);; biological process: metabolic process (GO:0008152);; molecular function: catalytic activity (GO:0003824);; biological process: cellular process (GO:0009987);; molecular function: binding (GO:0005488)	Phenylpropanoid biosynthesis (ko00940)
Medtr8g103700.JCVIMt4.0v1	c50013.graph_c0	210	9.5	41.67	1.86	0.000108921	up	1.73029	[K]	Transcription	--	--	--	--	Leucine rich repeat;; Leucine Rich Repeat;; Leucine Rich repeats (2 copies);; Leucine rich repeat N-terminal domain	Leucine-rich repeat extensin-like protein 5 OS=Arabidopsis thaliana OX=3702 GN=LRX5 PE=2 SV=2	S	Function unknown	LRR extensin-like protein [Medicago truncatula]	--	--
Medtr4g085480.JCVIMt4.0v1	c47239.graph_c0	4538.67	148.56	1373.33	44.24	8.67e-90	up	1.72715	[K]	Transcription	Cellular Component: membrane (GO:0016020);; Molecular Function: kinase activity (GO:0016301);; Biological Process: phosphorylation (GO:0016310);;	--	--	--	Leucine rich repeat;; Leucine Rich repeats (2 copies);; Leucine Rich Repeat;; Leucine rich repeat N-terminal domain	Uncharacterized protein At4g06744 OS=Arabidopsis thaliana OX=3702 GN=At4g06744 PE=2 SV=1	--	--	Serine/Threonine kinase, plant-type protein, putative [Medicago truncatula]	cellular component: membrane (GO:0016020);; biological process: metabolic process (GO:0008152);; biological process: cellular process (GO:0009987);; molecular function: catalytic activity (GO:0003824)	--
Medtr3g114930.JCVIMt4.0v1	c17864.graph_c0	61.67	6.09	15	1.52	1.26e-06	up	1.72589	--	--	--	--	--	--	--	--	--	--	ribonuclease H, partial [Trifolium pratense]	--	--
Medtr4g102040.JCVIMt4.0v1	c39421.graph_c0	104.67	10.58	26.67	3.19	7.79e-07	up	1.72058	--	--	--	--	[R]	General function prediction only	--	--	S	Function unknown	hypothetical protein MTR_4g102040 [Medicago truncatula]	--	--
Medtr3g024510.JCVIMt4.0v1	c47938.graph_c0	1210.33	53.44	316.67	16.06	1.61e-08	up	1.72056	[IR]	Lipid transport and metabolism ;; General function prediction only	Molecular Function: hydrolase activity, acting on ester bonds (GO:0016788);; Molecular Function: 9,9'-dicis-carotene:quinone oxidoreductase activity (GO:0052886);; Molecular Function: 7,9,9'-tricis-neurosporene:quinone oxidoreductase activity (GO:0052887);; Biological Process: 9,9'-di-cis-zeta-carotene desaturation to 7,9,7',9'-tetra-cis-lycopene (GO:0052889);; Biological Process: oxidation-reduc…	--	--	--	GDSL-like Lipase/Acylhydrolase	GDSL esterase/lipase At1g29670 OS=Arabidopsis thaliana OX=3702 GN=At1g29670 PE=2 SV=1	S	Function unknown	GDSL-like lipase/acylhydrolase [Medicago truncatula]	molecular function: catalytic activity (GO:0003824);; biological process: metabolic process (GO:0008152);; biological process: single-organism process (GO:0044699);; biological process: cellular process (GO:0009987)	--
Medtr7g050950.JCVIMt4.0v1	c49453.graph_c0	3075	97.66	832.67	26.47	1.4e-09	up	1.71812	[GI]	Carbohydrate transport and metabolism ;; Lipid transport and metabolism	Cellular Component: extracellular region (GO:0005576);; Cellular Component: cell wall (GO:0005618);; Cellular Component: integral component of membrane (GO:0016021);; Molecular Function: pectinesterase activity (GO:0030599);; Biological Process: cell wall modification (GO:0042545);; Biological Process: negative regulation of catalytic activity (GO:0043086);; Molecular Function: aspartyl esterase …	K01051|0|mtr:MTR_7g050950|K01051 pectinesterase [EC:3.1.1.11] | (RefSeq) pectinesterase/pectinesterase inhibitor	--	--	Pectinesterase;; Plant invertase/pectin methylesterase inhibitor	Pectinesterase 2.1 OS=Solanum lycopersicum OX=4081 GN=PME2.1 PE=2 SV=2	G	Carbohydrate transport and metabolism	pectinesterase/pectinesterase inhibitor [Medicago truncatula]	cellular component: extracellular region (GO:0005576);; cellular component: cell (GO:0005623);; cellular component: cell part (GO:0044464);; cellular component: membrane (GO:0016020);; cellular component: membrane part (GO:0044425);; molecular function: catalytic activity (GO:0003824);; biological process: cellular process (GO:0009987);; biological process: cellular component organization or biog…	Pentose and glucuronate interconversions (ko00040);; Starch and sucrose metabolism (ko00500)
Medtr7g102450.JCVIMt4.0v1	c36341.graph_c0	1189	135.57	356.67	39.49	2.86e-37	up	1.71743	--	--	Biological Process: flavonoid biosynthetic process (GO:0009813);; Cellular Component: intracellular membrane-bounded organelle (GO:0043231);; Biological Process: flavonoid glucuronidation (GO:0052696);; Molecular Function: quercetin 3-O-glucosyltransferase activity (GO:0080043);; Molecular Function: quercetin 7-O-glucosyltransferase activity (GO:0080044);;	K13496|7.35585e-63|mtr:MTR_7g102450|K13496 UDP-glucosyl transferase 73C [EC:2.4.1.-] | (RefSeq) UDP-glucosyltransferase family protein	[GC]	--	UDP-glucoronosyl and UDP-glucosyl transferase	UDP-glycosyltransferase 73C2 OS=Arabidopsis thaliana OX=3702 GN=UGT73C2 PE=3 SV=1	S	Function unknown	UDP-glucosyltransferase family protein [Medicago truncatula]	biological process: metabolic process (GO:0008152);; cellular component: cell (GO:0005623);; cellular component: organelle (GO:0043226);; cellular component: cell part (GO:0044464);; biological process: cellular process (GO:0009987);; biological process: single-organism process (GO:0044699);; molecular function: catalytic activity (GO:0003824)	--
Medtr1g090380.JCVIMt4.0v1	c46101.graph_c0	758.33	21.23	228.67	6.28	2.96e-34	up	1.71189	--	--	Molecular Function: magnesium ion binding (GO:0000287);; Cellular Component: cytosol (GO:0005829);; Molecular Function: 5'-nucleotidase activity (GO:0008253);; Biological Process: dephosphorylation (GO:0016311);;	K01081|0|cam:101488855|K01081 5'-nucleotidase [EC:3.1.3.5] | (RefSeq) 7-methylguanosine phosphate-specific 5'-nucleotidase	[S]	Function unknown	Pyrimidine 5'-nucleotidase (UMPH-1)	--	F	Nucleotide transport and metabolism	PREDICTED: 7-methylguanosine phosphate-specific 5&apos;-nucleotidase [Cicer arietinum]	molecular function: binding (GO:0005488);; cellular component: cell (GO:0005623);; cellular component: cell part (GO:0044464);; biological process: metabolic process (GO:0008152);; biological process: cellular process (GO:0009987);; molecular function: catalytic activity (GO:0003824)	Purine metabolism (ko00230);; Pyrimidine metabolism (ko00240);; Nicotinate and nicotinamide metabolism (ko00760)
Medtr8g089320.JCVIMt4.0v1	c45264.graph_c0	103.67	3.54	27.33	0.87	3.24e-07	up	1.71102	[E]	Amino acid transport and metabolism	Molecular Function: L-glutamate transmembrane transporter activity (GO:0005313);; Cellular Component: integral component of plasma membrane (GO:0005887);; Molecular Function: L-lysine transmembrane transporter activity (GO:0015189);; Molecular Function: antiporter activity (GO:0015297);; Biological Process: L-arginine import (GO:0043091);; Biological Process: L-glutamate import (GO:0051938);; Bio…	K03294|0|mtr:MTR_8g089320|K03294 basic amino acid/polyamine antiporter, APA family | (RefSeq) cationic amino acid transporter-like protein	[E]	Amino acid transport and metabolism	Amino acid permease;; Amino acid permease;; C-terminus of AA_permease	Cationic amino acid transporter 1 OS=Arabidopsis thaliana OX=3702 GN=CAT1 PE=1 SV=1	E	Amino acid transport and metabolism	cationic amino acid transporter-like protein [Medicago truncatula]	biological process: single-organism process (GO:0044699);; biological process: localization (GO:0051179);; molecular function: transporter activity (GO:0005215);; cellular component: cell (GO:0005623);; cellular component: membrane (GO:0016020);; cellular component: membrane part (GO:0044425);; cellular component: cell part (GO:0044464)	--
Medtr5g045880.JCVIMt4.0v1	c17716.graph_c0	799.33	27.48	244.67	8.22	1.3e-43	up	1.70246	--	--	--	--	[R]	General function prediction only	Domain of unknown function (DUF4283);; Zinc knuckle	--	--	--	hypothetical protein TSUD_407660 [Trifolium subterraneum]	--	--
Medtr8g098435.JCVIMt4.0v1	c42835.graph_c0	2081.33	50.17	590.67	13.73	2.44e-10	up	1.70209	[QV]	Secondary metabolites biosynthesis, transport and catabolism ;; Defense mechanisms	Molecular Function: monooxygenase activity (GO:0004497);; Molecular Function: iron ion binding (GO:0005506);; Cellular Component: integral component of membrane (GO:0016021);; Molecular Function: oxidoreductase activity, acting on paired donors, with incorporation or reduction of molecular oxygen (GO:0016705);; Molecular Function: heme binding (GO:0020037);; Biological Process: oxidation-reductio…	K15398|0|mtr:MTR_8g098435|K15398 fatty acid omega-hydroxylase [EC:1.14.-.-] | (RefSeq) cytochrome P450 family 94 protein	[QI]	--	Cytochrome P450	Cytochrome P450 86A22 OS=Petunia hybrida OX=4102 GN=CYP86A22 PE=1 SV=1	Q	Secondary metabolites biosynthesis, transport and catabolism	cytochrome P450 family 94 protein [Medicago truncatula]	biological process: metabolic process (GO:0008152);; biological process: single-organism process (GO:0044699);; molecular function: catalytic activity (GO:0003824);; molecular function: binding (GO:0005488);; cellular component: membrane (GO:0016020);; cellular component: membrane part (GO:0044425)	Cutin, suberine and wax biosynthesis (ko00073)
--	c52402.graph_c1	48.33	2.56	10.67	0.42	3.1e-05	up	1.70186	--	--	--	--	--	--	--	--	--	--	--	--	--
Medtr4g077570.JCVIMt4.0v1	c38009.graph_c0	79	8.58	19.33	2.14	1.44e-06	up	1.70124	--	--	Molecular Function: zinc ion binding (GO:0008270);; Cellular Component: integral component of membrane (GO:0016021);; Biological Process: cellular protein metabolic process (GO:0044267);;	--	[O]	Posttranslational modification, protein turnover, chaperones	Ring finger domain;; RING-like zinc finger;; Zinc finger, C3HC4 type (RING finger);; RING-H2 zinc finger domain;; Zinc finger, C3HC4 type (RING finger);; Anaphase-promoting complex subunit 11 RING-H2 finger;; RING-type zinc-finger	E3 ubiquitin-protein ligase RHA2B OS=Arabidopsis thaliana OX=3702 GN=RHA2B PE=1 SV=2	--	--	zinc finger, C3HC4 type (RING finger) protein [Medicago truncatula]	molecular function: binding (GO:0005488);; cellular component: membrane (GO:0016020);; cellular component: membrane part (GO:0044425);; biological process: metabolic process (GO:0008152);; biological process: cellular process (GO:0009987)	--
Medtr1g098460.JCVIMt4.0v1	c44177.graph_c1	411.33	32.01	119	8.24	6.47e-16	up	1.69834	--	--	Molecular Function: DNA binding (GO:0003677);; Molecular Function: transcription factor activity, sequence-specific DNA binding (GO:0003700);; Cellular Component: nucleus (GO:0005634);; Biological Process: regulation of transcription, DNA-templated (GO:0006355);;	--	--	--	AP2 domain	Ethylene-responsive transcription factor ERF113 OS=Arabidopsis thaliana OX=3702 GN=ERF113 PE=2 SV=1	K	Transcription	ethylene response factor [Medicago truncatula]	molecular function: binding (GO:0005488);; biological process: biological regulation (GO:0065007);; molecular function: nucleic acid binding transcription factor activity (GO:0001071);; cellular component: cell (GO:0005623);; cellular component: organelle (GO:0043226);; cellular component: cell part (GO:0044464)	--
Medtr7g011350.JCVIMt4.0v1	c45452.graph_c0	235.67	4.85	70.33	1.45	3.68e-18	up	1.69793	--	--	Cellular Component: trans-Golgi network (GO:0005802);; Cellular Component: plasma membrane (GO:0005886);; Cellular Component: integral component of membrane (GO:0016021);;	--	[U]	Intracellular trafficking, secretion, and vesicular transport	EXS family;; SPX domain	Phosphate transporter PHO1 homolog 9 OS=Arabidopsis thaliana OX=3702 GN=PHO1-H9 PE=2 SV=1	T	Signal transduction mechanisms	phosphate transporter PHO1-like protein [Medicago truncatula]	cellular component: cell (GO:0005623);; cellular component: organelle (GO:0043226);; cellular component: organelle part (GO:0044422);; cellular component: cell part (GO:0044464);; cellular component: membrane (GO:0016020);; cellular component: membrane part (GO:0044425)	--
Medtr8g031230.JCVIMt4.0v1	c47911.graph_c0	627	75.37	189.33	12.55	3.51e-35	up	1.69585	--	--	--	--	--	--	Ulp1 protease family, C-terminal catalytic domain	--	--	--	hypothetical protein MTR_8g031230 [Medicago truncatula]	--	--
Medtr4g485640.JCVIMt4.0v1	c43302.graph_c0	1598	58.42	485.67	17.58	8.64e-48	up	1.69553	--	--	Biological Process: flavonoid biosynthetic process (GO:0009813);; Cellular Component: intracellular membrane-bounded organelle (GO:0043231);; Biological Process: flavonoid glucuronidation (GO:0052696);; Molecular Function: quercetin 3-O-glucosyltransferase activity (GO:0080043);; Molecular Function: quercetin 7-O-glucosyltransferase activity (GO:0080044);;	K14595|1.23242e-61|cam:101510828|K14595 abscisate beta-glucosyltransferase [EC:2.4.1.263] | (RefSeq) UGT73AC1; abscisate beta-glucosyltransferase	[GC]	--	UDP-glucoronosyl and UDP-glucosyl transferase	Abscisate beta-glucosyltransferase OS=Phaseolus angularis OX=3914 GN=AOG PE=1 SV=1	S	Function unknown	PREDICTED: abscisate beta-glucosyltransferase [Cicer arietinum]	biological process: metabolic process (GO:0008152);; cellular component: cell (GO:0005623);; cellular component: organelle (GO:0043226);; cellular component: cell part (GO:0044464);; biological process: cellular process (GO:0009987);; biological process: single-organism process (GO:0044699);; molecular function: catalytic activity (GO:0003824)	Carotenoid biosynthesis (ko00906)
Medtr5g082750.JCVIMt4.0v1	c42733.graph_c3	58.33	4.31	13.67	1.88	1.31e-05	up	1.69548	[Q]	Secondary metabolites biosynthesis, transport and catabolism	Molecular Function: iron ion binding (GO:0005506);; Molecular Function: dioxygenase activity (GO:0051213);; Biological Process: oxidation-reduction process (GO:0055114);;	--	[QR]	--	2OG-Fe(II) oxygenase superfamily	Probable 2-oxoglutarate-dependent dioxygenase At5g05600 OS=Arabidopsis thaliana OX=3702 GN=At5g05600 PE=2 SV=1	S	Function unknown	leucoanthocyanidin dioxygenase-like protein [Medicago truncatula]	molecular function: binding (GO:0005488);; biological process: metabolic process (GO:0008152);; biological process: single-organism process (GO:0044699);; molecular function: catalytic activity (GO:0003824)	--
--	c31314.graph_c0	216.33	14.88	60.67	4.25	1.25e-12	up	1.69546	--	--	--	--	--	--	--	--	--	--	--	--	--
Medtr8g092650.JCVIMt4.0v1	c35297.graph_c0	248.67	7.72	74	2.23	4.17e-16	up	1.69528	--	--	Cellular Component: plasma membrane (GO:0005886);; Cellular Component: integral component of membrane (GO:0016021);; Molecular Function: transmembrane transporter activity (GO:0022857);; Biological Process: transmembrane transport (GO:0055085);;	--	--	--	EamA-like transporter family	WAT1-related protein At5g64700 OS=Arabidopsis thaliana OX=3702 GN=At5g64700 PE=2 SV=1	S	Function unknown	nodulin MtN21/EamA-like transporter family protein, putative [Medicago truncatula]	cellular component: cell (GO:0005623);; cellular component: membrane (GO:0016020);; cellular component: cell part (GO:0044464);; cellular component: membrane part (GO:0044425);; biological process: localization (GO:0051179);; molecular function: transporter activity (GO:0005215)	--
Medtr1g022255.JCVIMt4.0v1	c50149.graph_c1	224.33	6.1	67	1.71	2.31e-17	up	1.69445	[H]	Coenzyme transport and metabolism	Cellular Component: endosome (GO:0005768);; Cellular Component: trans-Golgi network (GO:0005802);; Molecular Function: methyltransferase activity (GO:0008168);; Molecular Function: FMN binding (GO:0010181);; Cellular Component: integral component of membrane (GO:0016021);; Biological Process: methylation (GO:0032259);; Molecular Function: iron-sulfur cluster binding (GO:0051536);;	--	--	--	Putative S-adenosyl-L-methionine-dependent methyltransferase;; Methyltransferase domain;; Methyltransferase domain;; Methyltransferase domain;; Putative S-adenosyl-L-methionine-dependent methyltransferase	Probable methyltransferase PMT28 OS=Arabidopsis thaliana OX=3702 GN=At1g19430 PE=2 SV=1	C	Energy production and conversion	methyltransferase PMT16, putative [Medicago truncatula]	cellular component: cell (GO:0005623);; cellular component: organelle (GO:0043226);; cellular component: cell part (GO:0044464);; cellular component: organelle part (GO:0044422);; biological process: metabolic process (GO:0008152);; molecular function: catalytic activity (GO:0003824);; molecular function: binding (GO:0005488);; cellular component: membrane (GO:0016020);; cellular component: membr…	--
Medtr3g479460.JCVIMt4.0v1	c41653.graph_c0	69.67	3.2	18.67	0.8	3.34e-07	up	1.69125	--	--	Molecular Function: oxidoreductase activity, acting on single donors with incorporation of molecular oxygen, incorporation of two atoms of oxygen (GO:0016702);; Biological Process: oxylipin biosynthetic process (GO:0031408);; Molecular Function: metal ion binding (GO:0046872);; Biological Process: oxidation-reduction process (GO:0055114);;	K00454|0|mtr:MTR_3g479460|K00454 lipoxygenase [EC:1.13.11.12] | (RefSeq) linoleate 13S-lipoxygenase 2-1, related protein	--	--	Lipoxygenase;; Lipoxygenase	Linoleate 13S-lipoxygenase 2-1, chloroplastic OS=Solanum tuberosum OX=4113 GN=LOX2.1 PE=1 SV=1	S	Function unknown	linoleate 13S-lipoxygenase 2-1, related protein [Medicago truncatula]	biological process: metabolic process (GO:0008152);; biological process: single-organism process (GO:0044699);; molecular function: catalytic activity (GO:0003824);; biological process: cellular process (GO:0009987);; molecular function: binding (GO:0005488)	Linoleic acid metabolism (ko00591);; alpha-Linolenic acid metabolism (ko00592)
Medtr4g104240.JCVIMt4.0v1	c41787.graph_c0	2098.67	69.41	649	20.89	2.62e-42	up	1.68855	[IR]	Lipid transport and metabolism ;; General function prediction only	Molecular Function: hydrolase activity, acting on ester bonds (GO:0016788);; Molecular Function: 9,9'-dicis-carotene:quinone oxidoreductase activity (GO:0052886);; Molecular Function: 7,9,9'-tricis-neurosporene:quinone oxidoreductase activity (GO:0052887);; Biological Process: 9,9'-di-cis-zeta-carotene desaturation to 7,9,7',9'-tetra-cis-lycopene (GO:0052889);; Biological Process: oxidation-reduc…	--	--	--	GDSL-like Lipase/Acylhydrolase	GDSL esterase/lipase At3g48460 OS=Arabidopsis thaliana OX=3702 GN=At3g48460 PE=2 SV=1	S	Function unknown	GDSL-like lipase/acylhydrolase [Medicago truncatula]	molecular function: catalytic activity (GO:0003824);; biological process: metabolic process (GO:0008152);; biological process: single-organism process (GO:0044699);; biological process: cellular process (GO:0009987)	--
Medtr4g125470.JCVIMt4.0v1	c37800.graph_c0	35.67	1.46	7	0.31	0.00013978	up	1.6882	[C]	Energy production and conversion	Molecular Function: NADPH dehydrogenase activity (GO:0003959);; Cellular Component: peroxisome (GO:0005777);; Biological Process: jasmonic acid biosynthetic process (GO:0009695);; Molecular Function: FMN binding (GO:0010181);; Molecular Function: 12-oxophytodienoate reductase activity (GO:0016629);; Biological Process: oxylipin biosynthetic process (GO:0031408);; Biological Process: oxidation-red…	K05894|0|mtr:MTR_4g125470|K05894 12-oxophytodienoic acid reductase [EC:1.3.1.42] | (RefSeq) 12-oxophytodienoate reductase-like protein	[CR]	--	NADH:flavin oxidoreductase / NADH oxidase family	12-oxophytodienoate reductase 3 OS=Solanum lycopersicum OX=4081 GN=OPR3 PE=1 SV=1	C	Energy production and conversion	12-oxophytodienoate reductase-like protein [Medicago truncatula]	biological process: metabolic process (GO:0008152);; biological process: single-organism process (GO:0044699);; molecular function: catalytic activity (GO:0003824);; cellular component: cell (GO:0005623);; cellular component: organelle (GO:0043226);; cellular component: cell part (GO:0044464);; biological process: cellular process (GO:0009987);; molecular function: binding (GO:0005488)	alpha-Linolenic acid metabolism (ko00592)
Medtr3g462950.JCVIMt4.0v1	c51679.graph_c0	20097.7	381.38	6248.67	116.42	3.93e-99	up	1.68739	[H]	Coenzyme transport and metabolism	Biological Process: thiamine biosynthetic process (GO:0009228);; Molecular Function: iron-sulfur cluster binding (GO:0051536);;	K03147|0|mtr:MTR_3g462950|K03147 phosphomethylpyrimidine synthase [EC:4.1.99.17] | (RefSeq) thiamine biosynthesis protein ThiC	--	--	Radical SAM ThiC family;; ThiC-associated domain	Phosphomethylpyrimidine synthase, chloroplastic OS=Arabidopsis thaliana OX=3702 GN=THIC PE=1 SV=1	H	Coenzyme transport and metabolism	thiamine biosynthesis protein ThiC [Medicago truncatula]	biological process: metabolic process (GO:0008152);; biological process: cellular process (GO:0009987);; biological process: single-organism process (GO:0044699);; molecular function: binding (GO:0005488)	Thiamine metabolism (ko00730)
Medtr5g021390.JCVIMt4.0v1	c45630.graph_c0	721.33	21.26	223	6.43	5.92e-42	up	1.68252	[QV]	Secondary metabolites biosynthesis, transport and catabolism ;; Defense mechanisms	Molecular Function: iron ion binding (GO:0005506);; Biological Process: lignin biosynthetic process (GO:0009809);; Cellular Component: integral component of membrane (GO:0016021);; Molecular Function: oxidoreductase activity, acting on paired donors, with incorporation or reduction of molecular oxygen, NAD(P)H as one donor, and incorporation of one atom of oxygen (GO:0016709);; Molecular Function…	K09755|0|mtr:MTR_5g021390|K09755 ferulate-5-hydroxylase [EC:1.14.-.-] | (RefSeq) cytochrome P450 family ferulate hydroxylase	[Q]	Secondary metabolites biosynthesis, transport and catabolism	Cytochrome P450	Cytochrome P450 84A1 OS=Arabidopsis thaliana OX=3702 GN=CYP84A1 PE=1 SV=1	Q	Secondary metabolites biosynthesis, transport and catabolism	ferulate 5-hydroxylase [Medicago sativa]	molecular function: binding (GO:0005488);; biological process: metabolic process (GO:0008152);; biological process: cellular process (GO:0009987);; biological process: single-organism process (GO:0044699);; cellular component: membrane (GO:0016020);; cellular component: membrane part (GO:0044425);; molecular function: catalytic activity (GO:0003824)	Phenylpropanoid biosynthesis (ko00940)
Medtr1g078490.JCVIMt4.0v1	c40067.graph_c0	390	13.56	116	3.97	4.93e-21	up	1.68202	[K]	Transcription	Biological Process: defense response (GO:0006952);; Molecular Function: ADP binding (GO:0043531);;	--	[T]	Signal transduction mechanisms	Leucine rich repeat;; Leucine Rich repeats (2 copies)	Putative disease resistance protein RGA3 OS=Solanum bulbocastanum OX=147425 GN=RGA3 PE=2 SV=2	S	Function unknown	disease resistance protein (CC-NBS-LRR class) family protein [Medicago truncatula]	biological process: response to stimulus (GO:0050896);; molecular function: binding (GO:0005488)	--
Medtr5g042560.JCVIMt4.0v1	c49832.graph_c0	1195.67	45.71	358.33	15.22	1.22e-32	up	1.68097	--	--	Cellular Component: membrane (GO:0016020);; Molecular Function: transferase activity, transferring glycosyl groups (GO:0016757);;	--	[R]	General function prediction only	Late exocytosis, associated with Golgi transport;; Cytosolic domain of 10TM putative phosphate transporter;; Calcium-dependent channel, 7TM region, putative phosphate;; Calcium-dependent channel, 7TM region, putative phosphate	CSC1-like protein At1g69450 OS=Arabidopsis thaliana OX=3702 GN=At1g69450 PE=2 SV=1	S	Function unknown	PREDICTED: CSC1-like protein At1g69450 [Cicer arietinum]	cellular component: membrane (GO:0016020);; molecular function: catalytic activity (GO:0003824)	--
Medtr3g437820.JCVIMt4.0v1	c44544.graph_c1	1171	79.06	350.67	23.85	7.29e-28	up	1.68015	[K]	Transcription	--	--	--	--	Leucine rich repeat;; Leucine Rich repeats (2 copies);; Leucine rich repeat N-terminal domain;; Leucine Rich Repeat	Polygalacturonase inhibitor OS=Pyrus communis OX=23211 GN=PGIP PE=1 SV=1	S	Function unknown	polygalacturonase inhibitor protein [Medicago truncatula]	--	--
Medtr1g077930.JCVIMt4.0v1	c36622.graph_c0	32	1.98	6.33	0.4	0.000257209	up	1.67928	[HR]	Coenzyme transport and metabolism ;; General function prediction only	Cellular Component: integral component of membrane (GO:0016021);; Molecular Function: hydrolase activity (GO:0016787);;	--	[R]	General function prediction only	alpha/beta hydrolase fold;; Alpha/beta hydrolase family;; Serine aminopeptidase, S33	Probable lysophospholipase BODYGUARD 3 OS=Arabidopsis thaliana OX=3702 GN=BDG3 PE=2 SV=1	S	Function unknown	alpha/beta-hydrolase superfamily protein [Medicago truncatula]	cellular component: membrane (GO:0016020);; cellular component: membrane part (GO:0044425);; molecular function: catalytic activity (GO:0003824)	--
Medtr1g041875.JCVIMt4.0v1	c52304.graph_c0	85.33	5.48	23.67	1.78	5.68e-08	up	1.67448	[E]	Amino acid transport and metabolism	Molecular Function: transporter activity (GO:0005215);; Biological Process: transport (GO:0006810);; Cellular Component: integral component of membrane (GO:0016021);;	--	[E]	Amino acid transport and metabolism	POT family	Protein NRT1/ PTR FAMILY 5.2 OS=Arabidopsis thaliana OX=3702 GN=NPF5.2 PE=2 SV=1	E	Amino acid transport and metabolism	peptide transporter [Medicago truncatula]	biological process: localization (GO:0051179);; molecular function: transporter activity (GO:0005215);; cellular component: membrane (GO:0016020);; cellular component: membrane part (GO:0044425)	--
Medtr1g106775.JCVIMt4.0v1	c39317.graph_c0	154.67	8.3	45.67	2.31	1.82e-13	up	1.67443	--	--	Cellular Component: integral component of membrane (GO:0016021);;	K13348|8.58295e-165|mtr:MTR_1g106775|K13348 protein Mpv17 | (RefSeq) peroxisomal membrane 22 kDa (Mpv17/PMP22) family protein	[R]	General function prediction only	Mpv17 / PMP22 family	Peroxisomal membrane protein PMP22 OS=Arabidopsis thaliana OX=3702 GN=PMP22 PE=1 SV=1	S	Function unknown	peroxisomal membrane 22 kDa (Mpv17/PMP22) family protein [Medicago truncatula]	cellular component: membrane (GO:0016020);; cellular component: membrane part (GO:0044425)	Peroxisome (ko04146)
Medtr3g082100.JCVIMt4.0v1	c17529.graph_c0	619	72.65	194.33	22.17	8.65e-30	up	1.66781	--	--	--	--	--	--	--	--	--	--	--	--	--
Medtr2g009660.JCVIMt4.0v1	c43007.graph_c0	484.33	64.27	150.33	18.7	4.61e-29	up	1.66706	--	--	--	--	--	--	--	--	--	--	Protein C6orf115, putative [Medicago truncatula]	--	--
Medtr8g099035.JCVIMt4.0v1	c37864.graph_c0	406	17.7	115.33	5.3	1.59e-13	up	1.66608	--	--	Cellular Component: integral component of membrane (GO:0016021);;	--	--	--	Late embryogenesis abundant protein	--	--	--	late embryogenesis abundant protein [Medicago truncatula]	cellular component: membrane (GO:0016020);; cellular component: membrane part (GO:0044425)	--
Medtr3g082100.JCVIMt4.0v1	c33031.graph_c0	456.33	29.06	142	8.68	1.67e-21	up	1.66605	--	--	Molecular Function: structural constituent of cell wall (GO:0005199);;	--	--	--	Hydrophobic seed protein;; Protease inhibitor/seed storage/LTP family	36.4 kDa proline-rich protein OS=Solanum lycopersicum OX=4081 GN=TPRP-F1 PE=2 SV=1	S	Function unknown	MtN4, partial [Medicago truncatula]	molecular function: structural molecule activity (GO:0005198)	--
Medtr1g101970.JCVIMt4.0v1	c33739.graph_c0	25.67	2.15	5.33	0.43	0.000233106	up	1.66541	--	--	Molecular Function: DNA binding (GO:0003677);; Molecular Function: transcription factor activity, sequence-specific DNA binding (GO:0003700);; Cellular Component: nucleus (GO:0005634);; Biological Process: regulation of transcription, DNA-templated (GO:0006355);; Molecular Function: protein dimerization activity (GO:0046983);;	K09264|4.73187e-103|cam:101488623|K09264 MADS-box transcription factor, plant | (RefSeq) MADS-box transcription factor 17-like	[K]	Transcription	K-box region;; SRF-type transcription factor (DNA-binding and dimerisation domain)	MADS-box transcription factor 17 OS=Oryza sativa subsp. japonica OX=39947 GN=MADS17 PE=1 SV=2	K	Transcription	MADS box protein M3 [Pisum sativum]	molecular function: binding (GO:0005488);; biological process: biological regulation (GO:0065007);; molecular function: nucleic acid binding transcription factor activity (GO:0001071);; cellular component: cell (GO:0005623);; cellular component: organelle (GO:0043226);; cellular component: cell part (GO:0044464)	--
Medtr4g020110.JCVIMt4.0v1	c39829.graph_c1	294.67	33.54	85.67	10.2	2.63e-14	up	1.66193	[E]	Amino acid transport and metabolism	Molecular Function: glutamate 5-kinase activity (GO:0004349);; Molecular Function: glutamate-5-semialdehyde dehydrogenase activity (GO:0004350);; Cellular Component: cytoplasm (GO:0005737);; Biological Process: proline biosynthetic process (GO:0006561);; Cellular Component: integral component of membrane (GO:0016021);; Biological Process: phosphorylation (GO:0016310);; Biological Process: oxidati…	K12657|9.65447e-42|mtr:MTR_4g020110|K12657 delta-1-pyrroline-5-carboxylate synthetase [EC:2.7.2.11 1.2.1.41] | (RefSeq) delta-1-pyrroline-5-carboxylate synthetase	[E]	Amino acid transport and metabolism	--	Delta-1-pyrroline-5-carboxylate synthase 2 OS=Oryza sativa subsp. japonica OX=39947 GN=P5CS2 PE=2 SV=1	E	Amino acid transport and metabolism	delta-1-pyrroline-5-carboxylate synthetase [Medicago truncatula]	biological process: metabolic process (GO:0008152);; biological process: cellular process (GO:0009987);; molecular function: catalytic activity (GO:0003824);; biological process: single-organism process (GO:0044699);; cellular component: cell (GO:0005623);; cellular component: cell part (GO:0044464);; cellular component: membrane (GO:0016020);; cellular component: membrane part (GO:0044425)	Arginine and proline metabolism (ko00330);; Biosynthesis of amino acids (ko01230)
Medtr1g105820.JCVIMt4.0v1	c51345.graph_c1	151.67	10.52	40	3.17	9.5e-08	up	1.66088	--	--	Molecular Function: protein serine/threonine kinase activity (GO:0004674);; Molecular Function: protein tyrosine kinase activity (GO:0004713);; Molecular Function: ATP binding (GO:0005524);; Cellular Component: plasma membrane (GO:0005886);; Cellular Component: plasmodesma (GO:0009506);; Cellular Component: integral component of membrane (GO:0016021);; Biological Process: peptidyl-tyrosine phosph…	K04733|7.98605e-91|mtr:MTR_1g105820|K04733 interleukin-1 receptor-associated kinase 4 [EC:2.7.11.1] | (RefSeq) cysteine-rich receptor-kinase-like protein	--	--	Protein tyrosine kinase	Cysteine-rich receptor-like protein kinase 29 OS=Arabidopsis thaliana OX=3702 GN=CRK29 PE=2 SV=1	T	Signal transduction mechanisms	cysteine-rich receptor-kinase-like protein [Medicago truncatula]	biological process: metabolic process (GO:0008152);; biological process: cellular process (GO:0009987);; molecular function: catalytic activity (GO:0003824);; molecular function: binding (GO:0005488);; cellular component: cell (GO:0005623);; cellular component: membrane (GO:0016020);; cellular component: cell part (GO:0044464);; cellular component: cell junction (GO:0030054);; cellular component:…	--
Medtr8g012585.JCVIMt4.0v1	c43074.graph_c1	188	5.08	56.33	1.5	3.35e-15	up	1.66087	[QV]	Secondary metabolites biosynthesis, transport and catabolism ;; Defense mechanisms	Molecular Function: iron ion binding (GO:0005506);; Cellular Component: integral component of membrane (GO:0016021);; Molecular Function: oxidoreductase activity, acting on paired donors, with incorporation or reduction of molecular oxygen, NAD(P)H as one donor, and incorporation of one atom of oxygen (GO:0016709);; Molecular Function: heme binding (GO:0020037);; Biological Process: secondary met…	K17961|6.28208e-124|mtr:MTR_8g012585|K17961 cytochrome P450 family 82 subfamily G polypeptide 1 [EC:1.14.-.-] | (RefSeq) cytochrome P450 family 82 protein	[Q]	Secondary metabolites biosynthesis, transport and catabolism	--	Cytochrome P450 82G1 OS=Arabidopsis thaliana OX=3702 GN=CYP82G1 PE=1 SV=1	Q	Secondary metabolites biosynthesis, transport and catabolism	cytochrome P450 family 82 protein [Medicago truncatula]	molecular function: binding (GO:0005488);; cellular component: membrane (GO:0016020);; cellular component: membrane part (GO:0044425);; biological process: metabolic process (GO:0008152);; biological process: single-organism process (GO:0044699);; molecular function: catalytic activity (GO:0003824)	Diterpenoid biosynthesis (ko00904)
Medtr3g082100.JCVIMt4.0v1	c53970.graph_c0	62.67	12.79	1.33	0.25	0.00104497	up	1.65916	--	--	--	--	--	--	--	--	--	--	--	--	--
Medtr1g077990.JCVIMt4.0v1	c49315.graph_c0	84.33	2.65	24	0.76	6.41e-08	up	1.65879	--	--	Cellular Component: endoplasmic reticulum (GO:0005783);; Biological Process: carbohydrate metabolic process (GO:0005975);; Biological Process: cell communication (GO:0007154);; Cellular Component: plant-type cell wall (GO:0009505);; Cellular Component: plasmodesma (GO:0009506);; Cellular Component: integral component of membrane (GO:0016021);; Molecular Function: polysaccharide binding (GO:003024…	--	--	--	Glycosyl hydrolases family 17	Glucan endo-1,3-beta-glucosidase 11 OS=Arabidopsis thaliana OX=3702 GN=At1g32860 PE=1 SV=1	G	Carbohydrate transport and metabolism	glucan endo-1,3-beta-glucosidase [Medicago truncatula]	cellular component: cell (GO:0005623);; cellular component: organelle (GO:0043226);; cellular component: cell part (GO:0044464);; biological process: metabolic process (GO:0008152);; biological process: cellular process (GO:0009987);; cellular component: cell junction (GO:0030054);; cellular component: symplast (GO:0055044);; cellular component: membrane (GO:0016020);; cellular component: membran…	--
Medtr3g008470.JCVIMt4.0v1	c49657.graph_c0	871.33	21.79	277	6.69	3.53e-38	up	1.6576	[G]	Carbohydrate transport and metabolism	Biological Process: transport (GO:0006810);; Cellular Component: integral component of membrane (GO:0016021);;	--	--	--	BT1 family;; Major Facilitator Superfamily	Probable folate-biopterin transporter 9, chloroplastic OS=Arabidopsis thaliana OX=3702 GN=At2g33280 PE=3 SV=2	G	Carbohydrate transport and metabolism	folate/biopterin transporter [Medicago truncatula]	biological process: localization (GO:0051179);; cellular component: membrane (GO:0016020);; cellular component: membrane part (GO:0044425)	--
Medtr1g492760.JCVIMt4.0v1	c48506.graph_c2	171.67	2.95	45.33	0.8	6.05e-08	up	1.65654	[L]	Replication, recombination and repair	Molecular Function: catalytic activity (GO:0003824);; Biological Process: base-excision repair (GO:0006284);; Molecular Function: 4 iron, 4 sulfur cluster binding (GO:0051539);;	--	--	--	RRM in Demeter;; Permuted single zf-CXXC unit;; HhH-GPD superfamily base excision DNA repair protein	Transcriptional activator DEMETER OS=Arabidopsis thaliana OX=3702 GN=DME PE=1 SV=2	L	Replication, recombination and repair	PREDICTED: transcriptional activator DEMETER-like [Cicer arietinum]	molecular function: catalytic activity (GO:0003824);; biological process: metabolic process (GO:0008152);; biological process: cellular process (GO:0009987);; biological process: response to stimulus (GO:0050896);; molecular function: binding (GO:0005488)	--
Medtr7g100510.JCVIMt4.0v1	c45479.graph_c0	100	2.97	28.33	0.82	4.86e-08	up	1.65219	--	--	Molecular Function: transcription factor activity, sequence-specific DNA binding (GO:0003700);; Biological Process: regulation of transcription, DNA-templated (GO:0006355);; Biological Process: seed coat development (GO:0010214);; Molecular Function: sequence-specific DNA binding (GO:0043565);;	--	--	--	WRKY DNA -binding domain	WRKY transcription factor 44 OS=Arabidopsis thaliana OX=3702 GN=WRKY44 PE=1 SV=2	K	Transcription	WRKY family transcription factor [Medicago truncatula]	biological process: biological regulation (GO:0065007);; molecular function: nucleic acid binding transcription factor activity (GO:0001071);; biological process: reproduction (GO:0000003);; biological process: reproductive process (GO:0022414);; biological process: multicellular organismal process (GO:0032501);; biological process: developmental process (GO:0032502);; biological process: single-…	--
Medtr2g012520.JCVIMt4.0v1	c32744.graph_c0	90.67	15	24.33	3.83	2.69e-06	up	1.65085	--	--	--	--	--	--	--	--	S	Function unknown	glycine-rich protein [Medicago sativa]	--	--
--	c17582.graph_c0	408.67	9.66	127.67	3.11	4.58e-28	up	1.64981	--	--	--	--	[R]	General function prediction only	Reverse transcriptase (RNA-dependent DNA polymerase);; Retroviral aspartyl protease;; gag-polyprotein putative aspartyl protease;; Aspartyl protease;; Integrase core domain	Uncharacterized mitochondrial protein AtMg00860 OS=Arabidopsis thaliana OX=3702 GN=AtMg00860 PE=4 SV=1	L	Replication, recombination and repair	hypothetical protein TSUD_392450 [Trifolium subterraneum]	--	--
Medtr0288s0040.JCVIMt4.0v1	c38210.graph_c2	65	18.09	16.67	4.98	6.27e-06	up	1.6452	[G]	Carbohydrate transport and metabolism	Biological Process: glycogen catabolic process (GO:0005980);; Molecular Function: glycogen phosphorylase activity (GO:0008184);; Cellular Component: plastid (GO:0009536);; Molecular Function: pyridoxal phosphate binding (GO:0030170);;	K00688|8.19685e-77|mdm:103442398|K00688 glycogen phosphorylase [EC:2.4.1.1] | (RefSeq) alpha-1,4 glucan phosphorylase L isozyme, chloroplastic/amyloplastic	[G]	Carbohydrate transport and metabolism	Carbohydrate phosphorylase	Alpha-1,4 glucan phosphorylase L isozyme, chloroplastic/amyloplastic OS=Vicia faba OX=3906 GN=PHO1 PE=2 SV=2	G	Carbohydrate transport and metabolism	alpha-1,4 glucan phosphorylase L isozyme chloroplastic/amyloplastic-like [Trifolium pratense]	biological process: metabolic process (GO:0008152);; biological process: cellular process (GO:0009987);; biological process: single-organism process (GO:0044699);; molecular function: catalytic activity (GO:0003824);; cellular component: cell (GO:0005623);; cellular component: organelle (GO:0043226);; cellular component: cell part (GO:0044464);; molecular function: binding (GO:0005488)	Starch and sucrose metabolism (ko00500)
Medtr3g100500.JCVIMt4.0v1	c45083.graph_c0	144.33	8.67	41.33	2.09	6.71e-07	up	1.64467	--	--	Molecular Function: aspartic-type endopeptidase activity (GO:0004190);; Biological Process: proteolysis (GO:0006508);; Biological Process: protein catabolic process (GO:0030163);;	--	[O]	Posttranslational modification, protein turnover, chaperones	Xylanase inhibitor N-terminal;; Xylanase inhibitor C-terminal;; Eukaryotic aspartyl protease	Aspartyl protease AED3 OS=Arabidopsis thaliana OX=3702 GN=AED3 PE=1 SV=1	O	Posttranslational modification, protein turnover, chaperones	aspartic proteinase nepenthesin-like protein [Medicago truncatula]	biological process: metabolic process (GO:0008152);; molecular function: catalytic activity (GO:0003824)	--
Medtr7g015340.JCVIMt4.0v1	c26465.graph_c0	573.33	37.59	183	11.68	5.25e-33	up	1.64345	--	--	--	--	--	--	--	--	--	--	hypothetical protein TSUD_170100 [Trifolium subterraneum]	--	--
Medtr7g076650.JCVIMt4.0v1	c23771.graph_c0	37.33	4.15	9	1.05	7.68e-05	up	1.64236	[C]	Energy production and conversion	Molecular Function: malate dehydrogenase (decarboxylating) (NAD+) activity (GO:0004471);; Biological Process: malate metabolic process (GO:0006108);; Molecular Function: metal ion binding (GO:0046872);; Molecular Function: NAD binding (GO:0051287);; Biological Process: oxidation-reduction process (GO:0055114);;	K00028|1.31008e-45|mtr:MTR_7g076650|K00028 malate dehydrogenase (decarboxylating) [EC:1.1.1.39] | (RefSeq) NADP-dependent malic enzyme	[C]	Energy production and conversion	Malic enzyme, NAD binding domain	NAD-dependent malic enzyme 59 kDa isoform, mitochondrial OS=Solanum tuberosum OX=4113 PE=1 SV=1	C	Energy production and conversion	NADP-dependent malic enzyme [Medicago truncatula]	biological process: metabolic process (GO:0008152);; biological process: single-organism process (GO:0044699);; molecular function: catalytic activity (GO:0003824);; biological process: cellular process (GO:0009987);; molecular function: binding (GO:0005488)	Pyruvate metabolism (ko00620);; Carbon fixation in photosynthetic organisms (ko00710);; Carbon metabolism (ko01200)
Medtr2g016370.JCVIMt4.0v1	c32125.graph_c0	44.67	2.86	11.33	0.73	1.71e-05	up	1.64057	--	--	Biological Process: transcription, DNA-templated (GO:0006351);; Molecular Function: sequence-specific DNA binding (GO:0043565);;	--	--	--	Seed dormancy control	Protein DOG1-like 4 OS=Arabidopsis thaliana OX=3702 GN=DOGL4 PE=2 SV=1	K	Transcription	seed dormancy control protein [Medicago truncatula]	biological process: metabolic process (GO:0008152);; biological process: cellular process (GO:0009987);; molecular function: binding (GO:0005488)	--
Medtr8g080570.JCVIMt4.0v1	c39685.graph_c0	85.67	5.14	24.67	1.44	2.33e-08	up	1.63942	--	--	Molecular Function: translation elongation factor activity (GO:0003746);; Biological Process: translational elongation (GO:0006414);; Cellular Component: integral component of membrane (GO:0016021);;	--	--	--	Rubber elongation factor protein (REF);; Rubber elongation factor protein (REF)	REF/SRPP-like protein At1g67360 OS=Arabidopsis thaliana OX=3702 GN=At1g67360 PE=2 SV=1	S	Function unknown	rubber elongation factor protein [Medicago truncatula]	biological process: metabolic process (GO:0008152);; biological process: cellular process (GO:0009987);; molecular function: binding (GO:0005488);; cellular component: membrane (GO:0016020);; cellular component: membrane part (GO:0044425)	--
Medtr1g075153.JCVIMt4.0v1	c46444.graph_c0	47.67	1.23	11.33	0.28	0.000132043	up	1.63909	--	--	--	--	--	--	Sieve element occlusion N-terminus;; Sieve element occlusion C-terminus	Protein SIEVE ELEMENT OCCLUSION B OS=Arabidopsis thaliana OX=3702 GN=SEOB PE=1 SV=1	--	--	sieve element occlusion protein [Medicago truncatula]	--	--
--	c45545.graph_c0	64.67	2.57	17	0.51	2.88e-05	up	1.63905	--	--	--	--	--	--	--	TNF receptor-associated factor homolog 1a OS=Arabidopsis thaliana OX=3702 GN=TRAF1A PE=1 SV=1	S	Function unknown	FKBP-type peptidyl-prolyl cis-trans isomerase [Medicago truncatula]	--	--
Medtr8g061360.JCVIMt4.0v1	c46675.graph_c2	956.67	31.71	296.33	9.8	4.31e-28	up	1.63792	[E]	Amino acid transport and metabolism	Molecular Function: L-tyrosine:2-oxoglutarate aminotransferase activity (GO:0004838);; Biological Process: cellular amino acid metabolic process (GO:0006520);; Biological Process: vitamin E biosynthetic process (GO:0010189);; Molecular Function: pyridoxal phosphate binding (GO:0030170);; Molecular Function: L-phenylalanine:2-oxoglutarate aminotransferase activity (GO:0080130);;	K00815|0|mtr:MTR_8g061360|K00815 tyrosine aminotransferase [EC:2.6.1.5] | (RefSeq) tyrosine/nicotianamine family aminotransferase	[E]	Amino acid transport and metabolism	Aminotransferase class I and II	Probable aminotransferase TAT2 OS=Arabidopsis thaliana OX=3702 GN=At5g53970 PE=2 SV=1	E	Amino acid transport and metabolism	tyrosine/nicotianamine family aminotransferase [Medicago truncatula]	molecular function: catalytic activity (GO:0003824);; biological process: metabolic process (GO:0008152);; biological process: cellular process (GO:0009987);; biological process: single-organism process (GO:0044699);; molecular function: binding (GO:0005488)	Ubiquinone and other terpenoid-quinone biosynthesis (ko00130);; Cysteine and methionine metabolism (ko00270);; Tyrosine metabolism (ko00350);; Phenylalanine metabolism (ko00360);; Phenylalanine, tyrosine and tryptophan biosynthesis (ko00400);; Isoquinoline alkaloid biosynthesis (ko00950);; Tropane, piperidine and pyridine alkaloid biosynthesis (ko00960);; Biosynthesis of amino acids (ko01230)
Medtr1g107235.JCVIMt4.0v1	c45538.graph_c3	45.67	4.44	11.33	1.13	2.05e-05	up	1.63496	[E]	Amino acid transport and metabolism	Biological Process: methionine biosynthetic process (GO:0009086);; Biological Process: phosphorylation (GO:0016310);; Molecular Function: S-methyl-5-thioribose kinase activity (GO:0046522);;	K00899|6.42161e-80|adu:107467343|K00899 5-methylthioribose kinase [EC:2.7.1.100] | (RefSeq) methylthioribose kinase-like	--	--	--	Methylthioribose kinase 1 OS=Oryza sativa subsp. japonica OX=39947 GN=MTK1 PE=2 SV=1	S	Function unknown	methylthioribose kinase [Trifolium pratense]	biological process: metabolic process (GO:0008152);; biological process: cellular process (GO:0009987);; biological process: single-organism process (GO:0044699);; molecular function: catalytic activity (GO:0003824)	Cysteine and methionine metabolism (ko00270)
Medtr7g070250.JCVIMt4.0v1	c36576.graph_c0	530.67	71.39	167.67	22.53	6.17e-32	up	1.63351	[Q]	Secondary metabolites biosynthesis, transport and catabolism	Molecular Function: phenylpyruvate tautomerase activity (GO:0050178);;	--	[V]	Defense mechanisms	Macrophage migration inhibitory factor (MIF)	--	S	Function unknown	macrophage migration inhibition factor-like protein [Medicago truncatula]	molecular function: catalytic activity (GO:0003824)	--
Medtr7g114340.JCVIMt4.0v1	c42826.graph_c0	305.67	7.15	95.67	2.14	1.07e-21	up	1.63204	[I]	Lipid transport and metabolism	Molecular Function: diacylglycerol O-acyltransferase activity (GO:0004144);; Cellular Component: plastoglobule (GO:0010287);; Biological Process: triglyceride biosynthetic process (GO:0019432);; Biological Process: phytol metabolic process (GO:0033306);;	--	--	--	Diacylglycerol acyltransferase	Acyltransferase-like protein At1g54570, chloroplastic OS=Arabidopsis thaliana OX=3702 GN=At1g54570 PE=1 SV=1	I	Lipid transport and metabolism	esterase/lipase/thioesterase-like protein [Medicago truncatula]	molecular function: catalytic activity (GO:0003824);; cellular component: cell (GO:0005623);; cellular component: organelle (GO:0043226);; cellular component: organelle part (GO:0044422);; cellular component: cell part (GO:0044464);; biological process: metabolic process (GO:0008152);; biological process: cellular process (GO:0009987);; biological process: single-organism process (GO:0044699)	--
Medtr4g081570.JCVIMt4.0v1	c44507.graph_c1	24	1.82	4.33	0.44	0.00069814	up	1.63116	--	--	--	--	--	--	--	--	--	--	--	--	--
Medtr1g098650.JCVIMt4.0v1	c43853.graph_c0	233.67	9.07	72.33	2.78	8.35e-17	up	1.63116	--	--	Cellular Component: plasmodesma (GO:0009506);; Cellular Component: integral component of membrane (GO:0016021);;	--	[S]	Function unknown	PAP2 superfamily C-terminal	--	S	Function unknown	plant inositol phosphorylceramide synthase [Medicago truncatula]	cellular component: cell junction (GO:0030054);; cellular component: symplast (GO:0055044);; cellular component: membrane (GO:0016020);; cellular component: membrane part (GO:0044425)	--
Medtr3g089035.JCVIMt4.0v1	c38761.graph_c0	91.67	7.22	26.67	2.01	7.38e-08	up	1.63059	--	--	Molecular Function: electron carrier activity (GO:0009055);; Cellular Component: integral component of membrane (GO:0016021);; Cellular Component: anchored component of plasma membrane (GO:0046658);;	--	--	--	Plastocyanin-like domain	Basic blue protein OS=Arabidopsis thaliana OX=3702 GN=ARPN PE=2 SV=2	S	Function unknown	basic blue-like protein [Medicago truncatula]	molecular function: electron carrier activity (GO:0009055);; cellular component: membrane (GO:0016020);; cellular component: membrane part (GO:0044425);; cellular component: cell (GO:0005623);; cellular component: cell part (GO:0044464)	--
Medtr7g079310.JCVIMt4.0v1	c50696.graph_c0	274	6.03	87	1.82	1.7e-14	up	1.62768	[O]	Posttranslational modification, protein turnover, chaperones	Molecular Function: serine-type endopeptidase activity (GO:0004252);; Cellular Component: cell wall (GO:0005618);; Biological Process: proteolysis (GO:0006508);;	--	--	--	Subtilase family;; Peptidase inhibitor I9	Subtilisin-like protease SBT1.9 OS=Arabidopsis thaliana OX=3702 GN=SBT1.9 PE=2 SV=1	O	Posttranslational modification, protein turnover, chaperones	subtilisin-like serine protease [Medicago truncatula]	biological process: metabolic process (GO:0008152);; molecular function: catalytic activity (GO:0003824);; cellular component: cell (GO:0005623);; cellular component: cell part (GO:0044464)	--
Medtr5g083520.JCVIMt4.0v1	c42016.graph_c0	128.33	5.69	37.33	1.62	9.83e-10	up	1.62596	--	--	--	--	--	--	--	--	S	Function unknown	biotin/lipoyl attachment domain protein [Medicago truncatula]	--	--
Medtr8g445340.JCVIMt4.0v1	c51434.graph_c0	35.67	1.24	8	0.27	0.000171079	up	1.62449	--	--	--	--	--	--	--	--	--	--	--	--	--
Medtr5g019050.JCVIMt4.0v1	c45468.graph_c0	80	4.99	22	1.35	9.08e-07	up	1.62074	[T]	Signal transduction mechanisms	Molecular Function: protein kinase activity (GO:0004672);; Molecular Function: ATP binding (GO:0005524);; Cellular Component: plasma membrane (GO:0005886);; Biological Process: protein phosphorylation (GO:0006468);; Molecular Function: chitin binding (GO:0008061);; Cellular Component: integral component of membrane (GO:0016021);; Biological Process: innate immune response (GO:0045087);;	--	--	--	Protein kinase domain;; Protein tyrosine kinase;; LysM domain	Protein LYK5 OS=Arabidopsis thaliana OX=3702 GN=LYK5 PE=2 SV=1	T	Signal transduction mechanisms	LysM-domain receptor-like kinase [Medicago truncatula]	biological process: metabolic process (GO:0008152);; biological process: cellular process (GO:0009987);; molecular function: catalytic activity (GO:0003824);; molecular function: binding (GO:0005488);; cellular component: cell (GO:0005623);; cellular component: membrane (GO:0016020);; cellular component: cell part (GO:0044464);; cellular component: membrane part (GO:0044425);; biological process:…	--
Medtr7g031230.JCVIMt4.0v1	c37679.graph_c0	112.67	2.74	32.33	0.88	4.51e-08	up	1.62003	--	--	--	--	--	--	--	--	--	--	hypothetical protein MTR_6g014585 [Medicago truncatula]	--	--
Medtr1g099310.JCVIMt4.0v1	c39406.graph_c0	16998	961.23	1257.67	76.43	0.00175489	up	1.61919	--	--	Biological Process: polysaccharide catabolic process (GO:0000272);; Molecular Function: chitinase activity (GO:0004568);; Cellular Component: extracellular space (GO:0005615);; Biological Process: chitin catabolic process (GO:0006032);; Molecular Function: chitin binding (GO:0008061);;	K01183|0|mtr:MTR_1g099310|K01183 chitinase [EC:3.2.1.14] | (RefSeq) chitinase	[M]	Cell wall/membrane/envelope biogenesis	Glycosyl hydrolases family 18	Acidic endochitinase OS=Cicer arietinum OX=3827 PE=2 SV=1	G	Carbohydrate transport and metabolism	chitinase [Medicago truncatula]	biological process: metabolic process (GO:0008152);; molecular function: catalytic activity (GO:0003824);; cellular component: extracellular region (GO:0005576);; cellular component: extracellular region part (GO:0044421);; molecular function: binding (GO:0005488)	Amino sugar and nucleotide sugar metabolism (ko00520)
Medtr4g007770.JCVIMt4.0v1	c36315.graph_c0	22	1.38	4.33	0.31	0.000655258	up	1.61639	--	--	Molecular Function: DNA binding (GO:0003677);; Molecular Function: transcription factor activity, sequence-specific DNA binding (GO:0003700);; Cellular Component: nucleus (GO:0005634);; Biological Process: regulation of transcription, DNA-templated (GO:0006355);; Biological Process: multicellular organism development (GO:0007275);;	K09285|0|mtr:MTR_4g007770|K09285 AP2-like factor, ANT lineage | (RefSeq) AP2-type transcription factor	--	--	AP2 domain	AP2-like ethylene-responsive transcription factor At1g16060 OS=Arabidopsis thaliana OX=3702 GN=At1g16060 PE=2 SV=1	K	Transcription	AP2-type transcription factor [Medicago truncatula]	molecular function: binding (GO:0005488);; biological process: biological regulation (GO:0065007);; molecular function: nucleic acid binding transcription factor activity (GO:0001071);; cellular component: cell (GO:0005623);; cellular component: organelle (GO:0043226);; cellular component: cell part (GO:0044464);; biological process: multicellular organismal process (GO:0032501);; biological proc…	--
Medtr5g090670.JCVIMt4.0v1	c44158.graph_c1	90.33	6.54	26.67	2.1	3.37e-08	up	1.61629	--	--	--	--	--	--	--	--	--	--	--	--	--
Medtr3g088705.JCVIMt4.0v1	c28118.graph_c0	40.67	3.54	10.33	0.89	4.43e-05	up	1.61472	--	--	--	--	--	--	--	--	--	--	hypothetical protein MTR_3g088705 [Medicago truncatula]	--	--
Medtr1g072360.JCVIMt4.0v1	c46573.graph_c0	61	2.33	16.33	0.62	4.41e-06	up	1.61448	--	--	Cellular Component: integral component of membrane (GO:0016021);;	--	--	--	--	F-box protein At2g27310 OS=Arabidopsis thaliana OX=3702 GN=At2g27310 PE=2 SV=1	S	Function unknown	F-box GID2-like protein [Medicago truncatula]	cellular component: membrane (GO:0016020);; cellular component: membrane part (GO:0044425)	--
Medtr3g088475.JCVIMt4.0v1	c43434.graph_c1	69.33	3.56	19.67	1.02	3.86e-07	up	1.61439	--	--	Biological Process: amino acid transmembrane transport (GO:0003333);; Cellular Component: plasma membrane (GO:0005886);; Molecular Function: amino acid transmembrane transporter activity (GO:0015171);; Cellular Component: integral component of membrane (GO:0016021);;	--	[E]	Amino acid transport and metabolism	Transmembrane amino acid transporter protein	Amino acid permease 3 OS=Arabidopsis thaliana OX=3702 GN=AAP3 PE=1 SV=2	E	Amino acid transport and metabolism	transmembrane amino acid transporter family protein [Medicago truncatula]	biological process: single-organism process (GO:0044699);; biological process: localization (GO:0051179);; cellular component: cell (GO:0005623);; cellular component: membrane (GO:0016020);; cellular component: cell part (GO:0044464);; molecular function: transporter activity (GO:0005215);; cellular component: membrane part (GO:0044425)	--
Medtr5g037540.JCVIMt4.0v1	c43489.graph_c0	768.33	38.25	238	11.74	8.28e-19	up	1.61319	--	--	--	--	--	--	Domain of unknown function (DUF569);; Fascin domain	--	S	Function unknown	actin cross-linking protein [Medicago truncatula]	--	--
Medtr7g111380.JCVIMt4.0v1	c52776.graph_c0	898.67	38.58	287.67	12.42	1.31e-25	up	1.60884	[S]	Function unknown	Cellular Component: integral component of membrane (GO:0016021);;	--	[R]	General function prediction only	Proteolipid membrane potential modulator	Hydrophobic protein RCI2B OS=Arabidopsis thaliana OX=3702 GN=RCI2B PE=2 SV=1	S	Function unknown	low temperature and salt responsive protein [Medicago sativa]	cellular component: membrane (GO:0016020);; cellular component: membrane part (GO:0044425)	--
Medtr4g118810.JCVIMt4.0v1	c45368.graph_c0	647.33	60.75	206.33	19.59	1.39e-27	up	1.60799	--	--	Cellular Component: plasma membrane (GO:0005886);; Cellular Component: integral component of membrane (GO:0016021);;	--	--	--	Domain of unknown function (DUF588);; Domain of unknown function (DUF588)	CASP-like protein 1E1 OS=Glycine max OX=3847 PE=2 SV=1	S	Function unknown	plant integral membrane protein [Medicago truncatula]	cellular component: cell (GO:0005623);; cellular component: membrane (GO:0016020);; cellular component: cell part (GO:0044464);; cellular component: membrane part (GO:0044425)	--
Medtr1g098160.JCVIMt4.0v1	c46529.graph_c0	13130	182.11	4321.33	59.22	9.18e-115	up	1.60546	--	--	Cellular Component: nucleoplasm (GO:0005654);; Biological Process: regulation of transcription, DNA-templated (GO:0006355);; Biological Process: response to cold (GO:0009409);; Biological Process: response to blue light (GO:0009637);; Biological Process: response to far red light (GO:0010218);; Biological Process: temperature compensation of the circadian clock (GO:0010378);; Biological Process: …	K12124|0|cam:101511540|K12124 GIGANTEA | (RefSeq) protein GIGANTEA	--	--	--	Protein GIGANTEA OS=Arabidopsis thaliana OX=3702 GN=GI PE=1 SV=2	S	Function unknown	gigantea protein 1B [Medicago truncatula]	cellular component: cell (GO:0005623);; cellular component: membrane-enclosed lumen (GO:0031974);; cellular component: organelle (GO:0043226);; cellular component: organelle part (GO:0044422);; cellular component: cell part (GO:0044464);; biological process: biological regulation (GO:0065007);; biological process: response to stimulus (GO:0050896)	Circadian rhythm - plant (ko04712)
Medtr1g098700.JCVIMt4.0v1	c43115.graph_c0	2983	84.63	973.67	27.03	5.74e-40	up	1.60451	--	--	Cellular Component: integral component of membrane (GO:0016021);;	--	--	--	Protein BYPASS1-related;; Protein of unknown function (DUF677)	--	S	Function unknown	plant/F1M20-13 protein [Medicago truncatula]	cellular component: membrane (GO:0016020);; cellular component: membrane part (GO:0044425)	--
--	c38815.graph_c0	1405.33	42.93	442.33	13.52	1.2e-22	up	1.60323	--	--	--	--	[L]	Replication, recombination and repair	DDE superfamily endonuclease	Protein ALP1-like OS=Arabidopsis thaliana OX=3702 GN=At3g55350 PE=2 SV=1	S	Function unknown	unknown [Medicago truncatula]	--	--
Medtr3g111840.JCVIMt4.0v1	c31841.graph_c0	878	33.82	288.67	10.82	6.77e-32	up	1.60035	[Q]	Secondary metabolites biosynthesis, transport and catabolism	Cellular Component: cytosol (GO:0005829);; Molecular Function: S-adenosylmethionine-dependent methyltransferase activity (GO:0008757);; Biological Process: methylation (GO:0032259);;	--	--	--	Leucine carboxyl methyltransferase;; Leucine carboxyl methyltransferase	--	Q	Secondary metabolites biosynthesis, transport and catabolism	leucine carboxyl methyltransferase [Medicago truncatula]	cellular component: cell (GO:0005623);; cellular component: cell part (GO:0044464);; biological process: metabolic process (GO:0008152);; molecular function: catalytic activity (GO:0003824)	--
Medtr1g006600.JCVIMt4.0v1	c39945.graph_c0	147	11.81	44.33	3.61	1.11e-10	up	1.59954	--	--	Cellular Component: integral component of membrane (GO:0016021);; Molecular Function: glucuronosyl-N-acetylglucosaminyl-proteoglycan 4-alpha-N-acetylglucosaminyltransferase activity (GO:0050508);;	--	[GMW]	--	Exostosin family	Probable glycosyltransferase At5g03795 OS=Arabidopsis thaliana OX=3702 GN=At5g03795 PE=3 SV=2	S	Function unknown	exostosin family protein [Medicago truncatula]	cellular component: membrane (GO:0016020);; cellular component: membrane part (GO:0044425);; molecular function: catalytic activity (GO:0003824)	--
Medtr0400s0040.JCVIMt4.0v1	c49089.graph_c1	287	22.87	90	6.98	6.52e-15	up	1.59712	[K]	Transcription	Molecular Function: protein kinase activity (GO:0004672);; Molecular Function: ATP binding (GO:0005524);; Biological Process: protein phosphorylation (GO:0006468);; Cellular Component: integral component of membrane (GO:0016021);;	--	--	--	Leucine rich repeat;; Leucine Rich repeats (2 copies);; Leucine Rich Repeat;; Leucine Rich repeat	MDIS1-interacting receptor like kinase 2 OS=Arabidopsis thaliana OX=3702 GN=MIK2 PE=1 SV=3	S	Function unknown	LRR receptor-like kinase family protein [Medicago truncatula]	biological process: metabolic process (GO:0008152);; biological process: cellular process (GO:0009987);; molecular function: catalytic activity (GO:0003824);; molecular function: binding (GO:0005488);; cellular component: membrane (GO:0016020);; cellular component: membrane part (GO:0044425)	--
Medtr1g093730.JCVIMt4.0v1	c46468.graph_c0	369.33	10.62	119.67	3.39	3.28e-22	up	1.59169	--	--	Molecular Function: ubiquitin-protein transferase activity (GO:0004842);; Cellular Component: cytoplasm (GO:0005737);; Molecular Function: zinc ion binding (GO:0008270);; Biological Process: regulation of signal transduction (GO:0009966);; Cellular Component: integral component of membrane (GO:0016021);; Biological Process: protein ubiquitination (GO:0016567);;	--	--	--	Transmembrane Fragile-X-F protein;; Zinc finger, C3HC4 type (RING finger)	Kinesin-like protein KIN-7D, mitochondrial OS=Arabidopsis thaliana OX=3702 GN=KIN7D PE=2 SV=1	S	Function unknown	transmembrane fragile-X-F-associated protein [Medicago truncatula]	biological process: metabolic process (GO:0008152);; biological process: cellular process (GO:0009987);; molecular function: catalytic activity (GO:0003824);; cellular component: cell (GO:0005623);; cellular component: cell part (GO:0044464);; molecular function: binding (GO:0005488);; biological process: biological regulation (GO:0065007);; cellular component: membrane (GO:0016020);; cellular co…	--
Medtr8g038210.JCVIMt4.0v1	c48754.graph_c0	163	9.15	51.67	2.78	4.47e-10	up	1.58951	--	--	Molecular Function: calcium ion binding (GO:0005509);; Molecular Function: calcium-dependent phospholipid binding (GO:0005544);;	--	[U]	Intracellular trafficking, secretion, and vesicular transport	Annexin	Annexin-like protein RJ4 OS=Fragaria ananassa OX=3747 PE=2 SV=2	S	Function unknown	annexin D8 [Medicago truncatula]	molecular function: binding (GO:0005488)	--
Medtr5g070330.JCVIMt4.0v1	c48762.graph_c4	61.33	5.34	17.67	1.45	2.06e-06	up	1.5856	--	--	Molecular Function: calcium:proton antiporter activity (GO:0015369);; Cellular Component: integral component of membrane (GO:0016021);; Biological Process: calcium ion transmembrane transport (GO:0070588);;	K07300|3.02104e-34|mtr:MTR_5g070330|K07300 Ca2+:H+ antiporter | (RefSeq) vacuolar cation/proton exchanger 3	[P]	Inorganic ion transport and metabolism	--	Vacuolar cation/proton exchanger 3 OS=Arabidopsis thaliana OX=3702 GN=CAX3 PE=1 SV=1	P	Inorganic ion transport and metabolism	vacuolar cation/proton exchanger 3-like protein [Trifolium pratense]	biological process: single-organism process (GO:0044699);; biological process: localization (GO:0051179);; molecular function: transporter activity (GO:0005215);; cellular component: membrane (GO:0016020);; cellular component: membrane part (GO:0044425)	--
Medtr1g102360.JCVIMt4.0v1	c38339.graph_c0	61.67	5.05	15.67	1.3	5.89e-05	up	1.58558	[T]	Signal transduction mechanisms	Molecular Function: protein kinase activity (GO:0004672);; Molecular Function: ATP binding (GO:0005524);; Biological Process: protein phosphorylation (GO:0006468);; Cellular Component: integral component of membrane (GO:0016021);;	--	[T]	Signal transduction mechanisms	Protein kinase domain;; Protein tyrosine kinase	Receptor-like serine/threonine-protein kinase At4g25390 OS=Arabidopsis thaliana OX=3702 GN=At4g25390 PE=2 SV=1	T	Signal transduction mechanisms	receptor-like serine/threonine-protein kinase [Trifolium pratense]	biological process: metabolic process (GO:0008152);; biological process: cellular process (GO:0009987);; molecular function: catalytic activity (GO:0003824);; molecular function: binding (GO:0005488);; cellular component: membrane (GO:0016020);; cellular component: membrane part (GO:0044425)	--
Medtr4g093860.JCVIMt4.0v1	c47121.graph_c0	79.67	2.26	23.33	0.67	1.52e-07	up	1.5847	--	--	Cellular Component: integral component of membrane (GO:0016021);;	--	--	--	--	--	S	Function unknown	transmembrane protein, putative [Medicago truncatula]	cellular component: membrane (GO:0016020);; cellular component: membrane part (GO:0044425)	--
--	c45017.graph_c0	30.33	7.77	7.33	1.85	0.000223982	up	1.58435	--	--	--	--	--	--	--	--	--	--	--	--	--
Medtr5g077130.JCVIMt4.0v1	c33956.graph_c0	98.33	6.69	29	1.97	2.95e-07	up	1.5802	[T]	Signal transduction mechanisms	Cellular Component: plasma membrane (GO:0005886);; Biological Process: response to stress (GO:0006950);; Molecular Function: hydrolase activity (GO:0016787);;	--	--	--	Universal stress protein family	Universal stress protein A-like protein OS=Arabidopsis thaliana OX=3702 GN=At3g01520 PE=1 SV=2	S	Function unknown	adenine nucleotide alpha hydrolase superfamily protein [Medicago truncatula]	cellular component: cell (GO:0005623);; cellular component: membrane (GO:0016020);; cellular component: cell part (GO:0044464);; biological process: response to stimulus (GO:0050896);; molecular function: catalytic activity (GO:0003824)	--
Medtr1g078490.JCVIMt4.0v1	c42753.graph_c0	278	14.8	86.33	4.64	1.26e-12	up	1.58011	[R]	General function prediction only	Biological Process: defense response (GO:0006952);; Molecular Function: ADP binding (GO:0043531);;	--	[T]	Signal transduction mechanisms	NB-ARC domain	Disease resistance protein RGA2 OS=Solanum bulbocastanum OX=147425 GN=RGA2 PE=1 SV=1	S	Function unknown	disease resistance protein (CC-NBS-LRR class) family protein [Medicago truncatula]	biological process: response to stimulus (GO:0050896);; molecular function: binding (GO:0005488)	--
Medtr1g016070.JCVIMt4.0v1	c45158.graph_c0	259.33	8.28	85.33	2.62	1.92e-15	up	1.57597	[I]	Lipid transport and metabolism	Biological Process: lipid metabolic process (GO:0006629);; Cellular Component: integral component of membrane (GO:0016021);; Molecular Function: oxidoreductase activity (GO:0016491);; Biological Process: oxidation-reduction process (GO:0055114);;	K13076|0|mtr:MTR_1g016070|K13076 Delta8-fatty-acid desaturase [EC:1.14.19.4] | (RefSeq) fatty acid/sphingolipid desaturase	[I]	Lipid transport and metabolism	Fatty acid desaturase;; Cytochrome b5-like Heme/Steroid binding domain	Acyl-lipid (9-3)-desaturase OS=Borago officinalis OX=13363 PE=1 SV=1	I	Lipid transport and metabolism	fatty acid/sphingolipid desaturase [Medicago truncatula]	biological process: metabolic process (GO:0008152);; biological process: single-organism process (GO:0044699);; cellular component: membrane (GO:0016020);; cellular component: membrane part (GO:0044425);; molecular function: catalytic activity (GO:0003824)	--
Medtr2g015840.JCVIMt4.0v1	c35156.graph_c0	654	56.75	139.33	14.09	0.0005614	up	1.57489	[O]	Posttranslational modification, protein turnover, chaperones	Biological Process: proteolysis (GO:0006508);; Molecular Function: cysteine-type peptidase activity (GO:0008234);;	--	[O]	Posttranslational modification, protein turnover, chaperones	Papain family cysteine protease;; Cathepsin propeptide inhibitor domain (I29);; Peptidase C1-like family	Senescence-specific cysteine protease SAG12 OS=Arabidopsis thaliana OX=3702 GN=SAG12 PE=1 SV=1	O	Posttranslational modification, protein turnover, chaperones	hypothetical protein TSUD_385370 [Trifolium subterraneum]	biological process: metabolic process (GO:0008152);; molecular function: catalytic activity (GO:0003824)	--
Medtr4g029600.JCVIMt4.0v1	c40467.graph_c0	1202.33	228.99	372.67	69.98	6.66e-08	up	1.56938	--	--	--	--	--	--	Extensin-like protein repeat	--	--	--	hypothetical protein KK1_048371 [Cajanus cajan]	--	--
--	c44728.graph_c0	5604.67	190.36	1659	56.69	6.73e-08	up	1.56884	--	--	--	--	[L]	Replication, recombination and repair	DDE superfamily endonuclease;; Plant transposon protein	Protein ALP1-like OS=Arabidopsis thaliana OX=3702 GN=At3g55350 PE=2 SV=1	S	Function unknown	PREDICTED: putative nuclease HARBI1 [Cicer arietinum]	--	--
Medtr1g072320.JCVIMt4.0v1	c41410.graph_c0	32	0.85	8	0.21	0.000236287	up	1.56864	--	--	Cellular Component: nucleus (GO:0005634);; Biological Process: regulation of transcription, DNA-templated (GO:0006355);; Biological Process: flavonoid biosynthetic process (GO:0009813);; Molecular Function: protein dimerization activity (GO:0046983);;	--	--	--	bHLH-MYC and R2R3-MYB transcription factors N-terminal;; Helix-loop-helix DNA-binding domain	Basic helix-loop-helix protein A OS=Pisum sativum OX=3888 GN=BHLH PE=3 SV=1	K	Transcription	bHLH transcription factor [Medicago truncatula]	cellular component: cell (GO:0005623);; cellular component: organelle (GO:0043226);; cellular component: cell part (GO:0044464);; biological process: biological regulation (GO:0065007);; biological process: metabolic process (GO:0008152);; molecular function: binding (GO:0005488)	--
Medtr1g054205.JCVIMt4.0v1	c38972.graph_c0	187	33.78	58.33	10.84	6.89e-12	up	1.5686	--	--	Molecular Function: peroxidase activity (GO:0004601);; Cellular Component: extracellular region (GO:0005576);; Biological Process: response to oxidative stress (GO:0006979);; Molecular Function: heme binding (GO:0020037);; Biological Process: hydrogen peroxide catabolic process (GO:0042744);; Molecular Function: metal ion binding (GO:0046872);; Biological Process: oxidation-reduction process (GO:…	K00430|2.92756e-73|mtr:MTR_1g054205|K00430 peroxidase [EC:1.11.1.7] | (RefSeq) peroxidase family protein	--	--	Peroxidase	Peroxidase 53 OS=Arabidopsis thaliana OX=3702 GN=PER53 PE=1 SV=1	G	Carbohydrate transport and metabolism	peroxidase family protein [Medicago truncatula]	biological process: metabolic process (GO:0008152);; biological process: cellular process (GO:0009987);; biological process: single-organism process (GO:0044699);; biological process: response to stimulus (GO:0050896);; biological process: detoxification (GO:0098754);; molecular function: catalytic activity (GO:0003824);; molecular function: antioxidant activity (GO:0016209);; cellular component:…	Phenylpropanoid biosynthesis (ko00940)
Medtr3g114120.JCVIMt4.0v1	c39615.graph_c0	983.67	42.7	327	13.82	1.27e-23	up	1.56773	[IR]	Lipid transport and metabolism ;; General function prediction only	Molecular Function: lipase activity (GO:0016298);; Molecular Function: 9,9'-dicis-carotene:quinone oxidoreductase activity (GO:0052886);; Molecular Function: 7,9,9'-tricis-neurosporene:quinone oxidoreductase activity (GO:0052887);; Biological Process: 9,9'-di-cis-zeta-carotene desaturation to 7,9,7',9'-tetra-cis-lycopene (GO:0052889);; Biological Process: oxidation-reduction process (GO:0055114);;	--	--	--	GDSL-like Lipase/Acylhydrolase	GDSL esterase/lipase EXL3 OS=Arabidopsis thaliana OX=3702 GN=EXL3 PE=2 SV=1	S	Function unknown	GDSL-like lipase/acylhydrolase [Medicago truncatula]	molecular function: catalytic activity (GO:0003824);; biological process: metabolic process (GO:0008152);; biological process: single-organism process (GO:0044699);; biological process: cellular process (GO:0009987)	--
Medtr5g056140.JCVIMt4.0v1	c49839.graph_c0	45	3.42	12	1.05	5.76e-05	up	1.56723	--	--	Molecular Function: nucleic acid binding (GO:0003676);; Molecular Function: endonuclease activity (GO:0004519);; Biological Process: DNA catabolic process (GO:0006308);; Biological Process: nucleic acid phosphodiester bond hydrolysis (GO:0090305);;	--	--	--	S1/P1 Nuclease	Endonuclease 2 OS=Arabidopsis thaliana OX=3702 GN=ENDO2 PE=1 SV=1	S	Function unknown	S1/P1 nuclease family protein [Medicago truncatula]	molecular function: binding (GO:0005488);; biological process: metabolic process (GO:0008152);; biological process: cellular process (GO:0009987);; molecular function: catalytic activity (GO:0003824)	--
Medtr2g018175.JCVIMt4.0v1	c35761.graph_c0	36	3.79	8.33	0.92	0.000342281	up	1.56645	--	--	--	--	--	--	Senescence regulator	--	S	Function unknown	senescence regulator [Medicago truncatula]	--	--
Medtr3g099120.JCVIMt4.0v1	c45684.graph_c2	363.33	10.67	120.67	3.55	1.79e-19	up	1.56635	[M]	Cell wall/membrane/envelope biogenesis	Biological Process: metabolic process (GO:0008152);; Molecular Function: phosphatidylcholine phospholipase C activity (GO:0034480);;	K01114|0|mtr:MTR_3g099120|K01114 phospholipase C [EC:3.1.4.3] | (RefSeq) non-specific phospholipase C4	--	--	Phosphoesterase family	Non-specific phospholipase C6 OS=Arabidopsis thaliana OX=3702 GN=NPC6 PE=2 SV=1	M	Cell wall/membrane/envelope biogenesis	non-specific phospholipase C4 [Medicago truncatula]	biological process: metabolic process (GO:0008152);; molecular function: catalytic activity (GO:0003824)	Inositol phosphate metabolism (ko00562);; Glycerophospholipid metabolism (ko00564);; Ether lipid metabolism (ko00565)
Medtr7g066590.JCVIMt4.0v1	c27785.graph_c0	178	20.02	55.67	6.38	1.34e-11	up	1.56523	[K]	Transcription	Cellular Component: integral component of membrane (GO:0016021);; Molecular Function: kinase activity (GO:0016301);; Biological Process: phosphorylation (GO:0016310);;	--	--	--	Leucine rich repeat;; Leucine Rich repeats (2 copies);; Leucine Rich Repeat	Leucine-rich repeat receptor-like tyrosine-protein kinase PXC3 OS=Arabidopsis thaliana OX=3702 GN=PXC3 PE=2 SV=1	S	Function unknown	PREDICTED: leucine-rich repeat receptor protein kinase MSP1-like isoform X2 [Cicer arietinum]	cellular component: membrane (GO:0016020);; cellular component: membrane part (GO:0044425);; biological process: metabolic process (GO:0008152);; biological process: cellular process (GO:0009987);; molecular function: catalytic activity (GO:0003824)	--
Medtr0288s0040.JCVIMt4.0v1	c38210.graph_c0	1507.33	31.24	499.67	10.2	2.55e-23	up	1.56515	[G]	Carbohydrate transport and metabolism	Biological Process: glycogen catabolic process (GO:0005980);; Molecular Function: glycogen phosphorylase activity (GO:0008184);; Biological Process: response to water deprivation (GO:0009414);; Cellular Component: amyloplast (GO:0009501);; Cellular Component: chloroplast stroma (GO:0009570);; Cellular Component: integral component of membrane (GO:0016021);; Molecular Function: pyridoxal phosphate…	K00688|0|cam:101506144|K00688 glycogen phosphorylase [EC:2.4.1.1] | (RefSeq) alpha-1,4 glucan phosphorylase L isozyme, chloroplastic/amyloplastic	[G]	Carbohydrate transport and metabolism	Carbohydrate phosphorylase	Alpha-1,4 glucan phosphorylase L isozyme, chloroplastic/amyloplastic OS=Vicia faba OX=3906 GN=PHO1 PE=2 SV=2	G	Carbohydrate transport and metabolism	PREDICTED: alpha-1,4 glucan phosphorylase L isozyme, chloroplastic/amyloplastic [Cicer arietinum]	biological process: metabolic process (GO:0008152);; biological process: cellular process (GO:0009987);; biological process: single-organism process (GO:0044699);; molecular function: catalytic activity (GO:0003824);; biological process: response to stimulus (GO:0050896);; cellular component: cell (GO:0005623);; cellular component: organelle (GO:0043226);; cellular component: cell part (GO:004446…	Starch and sucrose metabolism (ko00500)
Medtr3g096450.JCVIMt4.0v1	c37588.graph_c0	138.67	9.01	39	2.4	1.01e-06	up	1.56413	--	--	--	--	--	--	--	--	--	--	hypothetical protein MTR_3g096450 [Medicago truncatula]	--	--
Medtr1g115280.JCVIMt4.0v1	c49917.graph_c0	48	1.82	13.33	0.67	2.11e-05	up	1.56256	--	--	Molecular Function: nucleic acid binding (GO:0003676);; Biological Process: proteolysis (GO:0006508);; Molecular Function: peptidase activity (GO:0008233);; Molecular Function: zinc ion binding (GO:0008270);; Biological Process: DNA integration (GO:0015074);;	--	[R]	General function prediction only	gag-polypeptide of LTR copia-type;; Zinc knuckle;; GAG-pre-integrase domain	Retrovirus-related Pol polyprotein from transposon TNT 1-94 OS=Nicotiana tabacum OX=4097 PE=2 SV=1	L	Replication, recombination and repair	hypothetical protein VITISV_020559 [Vitis vinifera]	molecular function: binding (GO:0005488);; biological process: metabolic process (GO:0008152);; molecular function: catalytic activity (GO:0003824);; biological process: cellular process (GO:0009987)	--
Medtr2g104350.JCVIMt4.0v1	c36355.graph_c0	56.67	3.82	15	1.07	4.82e-05	up	1.56011	--	--	--	--	--	--	zinc-binding in reverse transcriptase	--	J	Translation, ribosomal structure and biogenesis	hypothetical protein TSUD_302020 [Trifolium subterraneum]	--	--
Medtr4g035180.JCVIMt4.0v1	c52483.graph_c0	1594.33	70.34	482.33	22.21	1.11e-08	up	1.55897	[T]	Signal transduction mechanisms	Molecular Function: protein serine/threonine kinase activity (GO:0004674);; Molecular Function: ATP binding (GO:0005524);; Biological Process: protein phosphorylation (GO:0006468);; Cellular Component: integral component of membrane (GO:0016021);; Molecular Function: protein homodimerization activity (GO:0042803);;	--	[T]	Signal transduction mechanisms	Protein kinase domain;; Protein tyrosine kinase;; ABC1 family	Serine/threonine-protein kinase-like protein CCR4 OS=Arabidopsis thaliana OX=3702 GN=CCR4 PE=1 SV=1	T	Signal transduction mechanisms	Serine/Threonine-kinase CCR3-like protein [Medicago truncatula]	biological process: metabolic process (GO:0008152);; biological process: cellular process (GO:0009987);; molecular function: catalytic activity (GO:0003824);; molecular function: binding (GO:0005488);; cellular component: membrane (GO:0016020);; cellular component: membrane part (GO:0044425)	--
Medtr7g102450.JCVIMt4.0v1	c36341.graph_c1	4565.33	232.3	1529.33	77.02	1.84e-37	up	1.55882	--	--	Biological Process: flavonoid biosynthetic process (GO:0009813);; Cellular Component: intracellular membrane-bounded organelle (GO:0043231);; Biological Process: flavonoid glucuronidation (GO:0052696);; Molecular Function: quercetin 3-O-glucosyltransferase activity (GO:0080043);; Molecular Function: quercetin 7-O-glucosyltransferase activity (GO:0080044);;	K13496|0|mtr:MTR_7g102450|K13496 UDP-glucosyl transferase 73C [EC:2.4.1.-] | (RefSeq) UDP-glucosyltransferase family protein	[GC]	--	UDP-glucoronosyl and UDP-glucosyl transferase	UDP-glycosyltransferase 73C1 OS=Arabidopsis thaliana OX=3702 GN=UGT73C1 PE=2 SV=1	S	Function unknown	unknown [Medicago truncatula]	biological process: metabolic process (GO:0008152);; cellular component: cell (GO:0005623);; cellular component: organelle (GO:0043226);; cellular component: cell part (GO:0044464);; biological process: cellular process (GO:0009987);; biological process: single-organism process (GO:0044699);; molecular function: catalytic activity (GO:0003824)	--
Medtr2g018670.JCVIMt4.0v1	c47138.graph_c0	92.67	7.84	23.67	2.16	4.48e-05	up	1.55378	--	--	--	--	--	--	--	--	S	Function unknown	hypothetical protein MTR_2g018670 [Medicago truncatula]	--	--
Medtr5g026360.JCVIMt4.0v1	c33500.graph_c0	29.33	1.31	6.67	0.3	0.000572249	up	1.55328	[G]	Carbohydrate transport and metabolism	Cellular Component: integral component of membrane (GO:0016021);; Molecular Function: transferase activity, transferring glycosyl groups (GO:0016757);;	--	--	--	Glycosyltransferase Family 4;; Glycosyl transferases group 1;; Glycosyl transferases group 1;; Glycosyl transferase 4-like domain	--	S	Function unknown	glycosyltransferase family protein [Medicago truncatula]	cellular component: membrane (GO:0016020);; cellular component: membrane part (GO:0044425);; molecular function: catalytic activity (GO:0003824)	--
--	c43167.graph_c0	197.67	34.62	64	11.56	1.38e-12	up	1.55082	--	--	--	--	--	--	--	--	--	--	--	--	--
Medtr3g037230.JCVIMt4.0v1	c46621.graph_c0	868.33	28.62	293	9.51	1.03e-33	up	1.55036	[S]	Function unknown	Molecular Function: ATP-dependent peptidase activity (GO:0004176);; Biological Process: proteolysis (GO:0006508);; Molecular Function: zinc ion binding (GO:0008270);;	--	[O]	Posttranslational modification, protein turnover, chaperones	ATP-dependent protease La (LON) substrate-binding domain;; Zinc finger, C3HC4 type (RING finger);; Zinc finger, C3HC4 type (RING finger);; Zinc finger, C3HC4 type (RING finger);; Ring finger domain;; zinc-RING finger domain;; RING-type zinc-finger	E3 ubiquitin-protein ligase PRT1 OS=Arabidopsis thaliana OX=3702 GN=PRT1 PE=2 SV=2	O	Posttranslational modification, protein turnover, chaperones	zinc finger, C3HC4 type (RING finger) protein [Medicago truncatula]	biological process: metabolic process (GO:0008152);; molecular function: catalytic activity (GO:0003824);; molecular function: binding (GO:0005488)	--
Medtr4g102390.JCVIMt4.0v1	c37072.graph_c0	1711.67	64.4	586.67	21.79	3.76e-59	up	1.54315	[R]	General function prediction only	--	K09560|5.19189e-133|mtr:MTR_4g102390|K09560 suppressor of tumorigenicity protein 13 | (RefSeq) Hsc70-interacting protein	[OT]	--	Tetratricopeptide repeat;; Tetratricopeptide repeat;; Tetratricopeptide repeat;; TPR repeat;; Tetratricopeptide repeat;; Tetratricopeptide repeat	FAM10 family protein At4g22670 OS=Arabidopsis thaliana OX=3702 GN=At4g22670 PE=1 SV=1	S	Function unknown	Hsc70-interacting protein [Medicago truncatula]	--	--
Medtr4g064730.JCVIMt4.0v1	c44592.graph_c0	221	6.11	73.67	1.98	3.3e-14	up	1.54142	--	--	Molecular Function: DNA binding (GO:0003677);; Molecular Function: transcription factor activity, sequence-specific DNA binding (GO:0003700);; Cellular Component: nucleus (GO:0005634);; Biological Process: regulation of transcription, DNA-templated (GO:0006355);; Biological Process: circadian rhythm (GO:0007623);; Biological Process: regulation of flower development (GO:0009909);;	--	--	--	Myb-like DNA-binding domain	Transcription factor LUX OS=Arabidopsis thaliana OX=3702 GN=LUX PE=1 SV=1	K	Transcription	myb-like DNA-binding domain, shaqkyf class protein [Medicago truncatula]	molecular function: binding (GO:0005488);; biological process: biological regulation (GO:0065007);; molecular function: nucleic acid binding transcription factor activity (GO:0001071);; cellular component: cell (GO:0005623);; cellular component: organelle (GO:0043226);; cellular component: cell part (GO:0044464);; biological process: rhythmic process (GO:0048511)	--
Medtr8g039500.JCVIMt4.0v1	c32013.graph_c0	197.33	3.95	63.33	1.26	1.14e-11	up	1.53764	--	--	--	--	--	--	--	Putative F-box protein At3g16210 OS=Arabidopsis thaliana OX=3702 GN=At3g16210 PE=4 SV=1	M	Cell wall/membrane/envelope biogenesis	F-box protein interaction domain protein [Medicago truncatula]	--	--
Medtr1g105840.JCVIMt4.0v1	c33768.graph_c0	100	6.78	30.67	2.19	8.01e-08	up	1.53715	--	--	Molecular Function: protein serine/threonine kinase activity (GO:0004674);; Molecular Function: ATP binding (GO:0005524);; Cellular Component: plasma membrane (GO:0005886);; Biological Process: protein phosphorylation (GO:0006468);; Cellular Component: plasmodesma (GO:0009506);; Cellular Component: integral component of membrane (GO:0016021);; Biological Process: defense response to bacterium (GO…	K04733|8.35876e-100|mtr:MTR_1g105835|K04733 interleukin-1 receptor-associated kinase 4 [EC:2.7.11.1] | (RefSeq) receptor-like kinase	--	--	Protein tyrosine kinase	Cysteine-rich receptor-like protein kinase 29 OS=Arabidopsis thaliana OX=3702 GN=CRK29 PE=2 SV=1	T	Signal transduction mechanisms	receptor-like kinase [Medicago truncatula]	biological process: metabolic process (GO:0008152);; biological process: cellular process (GO:0009987);; molecular function: catalytic activity (GO:0003824);; molecular function: binding (GO:0005488);; cellular component: cell (GO:0005623);; cellular component: membrane (GO:0016020);; cellular component: cell part (GO:0044464);; cellular component: cell junction (GO:0030054);; cellular component:…	--
Medtr6g074670.JCVIMt4.0v1	c53385.graph_c0	284.67	11.1	95.33	2.81	5.57e-18	up	1.53309	--	--	--	--	--	--	--	--	--	--	--	--	--
Medtr1g021610.JCVIMt4.0v1	c47403.graph_c0	80	6.6	23.67	1.98	1.97e-06	up	1.53278	[W]	Extracellular structures	Molecular Function: protein serine/threonine kinase activity (GO:0004674);; Molecular Function: ATP binding (GO:0005524);; Biological Process: protein phosphorylation (GO:0006468);; Cellular Component: integral component of membrane (GO:0016021);;	--	--	--	Protein tyrosine kinase;; Protein kinase domain	Cysteine-rich receptor-like protein kinase 8 OS=Arabidopsis thaliana OX=3702 GN=CRK8 PE=3 SV=2	T	Signal transduction mechanisms	cysteine-rich receptor-kinase-like protein [Medicago truncatula]	biological process: metabolic process (GO:0008152);; biological process: cellular process (GO:0009987);; molecular function: catalytic activity (GO:0003824);; molecular function: binding (GO:0005488);; cellular component: membrane (GO:0016020);; cellular component: membrane part (GO:0044425)	--
Medtr3g083920.JCVIMt4.0v1	c41285.graph_c0	806	20.41	279	6.83	1.59e-39	up	1.52764	[Q]	Secondary metabolites biosynthesis, transport and catabolism	Biological Process: flavonoid biosynthetic process (GO:0009813);; Molecular Function: naringenin-chalcone synthase activity (GO:0016210);;	K00660|0|cam:101489106|K00660 chalcone synthase [EC:2.3.1.74] | (RefSeq) chalcone synthase 1	--	--	Chalcone and stilbene synthases, N-terminal domain;; Chalcone and stilbene synthases, C-terminal domain;; 3-Oxoacyl-[acyl-carrier-protein (ACP)] synthase III C terminal;; 3-Oxoacyl-[acyl-carrier-protein (ACP)] synthase III;; FAE1/Type III polyketide synthase-like protein;; FKBP-type peptidyl-prolyl cis-trans isomerase	Chalcone synthase 1 OS=Glycine max OX=3847 GN=CHS1 PE=3 SV=1	Q	Secondary metabolites biosynthesis, transport and catabolism	PREDICTED: chalcone synthase 1 [Cicer arietinum]	biological process: metabolic process (GO:0008152);; molecular function: catalytic activity (GO:0003824)	Flavonoid biosynthesis (ko00941);; Circadian rhythm - plant (ko04712)
Medtr3g107380.JCVIMt4.0v1	c31100.graph_c0	239	11.52	80	3.8	6.07e-11	up	1.52637	--	--	Molecular Function: DNA binding (GO:0003677);; Molecular Function: transcription factor activity, sequence-specific DNA binding (GO:0003700);; Cellular Component: nucleus (GO:0005634);; Biological Process: regulation of transcription, DNA-templated (GO:0006355);;	--	--	--	AP2 domain	Ethylene-responsive transcription factor SHINE 3 OS=Arabidopsis thaliana OX=3702 GN=SHN3 PE=2 SV=1	K	Transcription	ethylene response factor [Medicago truncatula]	molecular function: binding (GO:0005488);; biological process: biological regulation (GO:0065007);; molecular function: nucleic acid binding transcription factor activity (GO:0001071);; cellular component: cell (GO:0005623);; cellular component: organelle (GO:0043226);; cellular component: cell part (GO:0044464)	--
--	c40926.graph_c0	26	0.68	6	0.16	0.000805823	up	1.52572	--	--	--	--	[R]	General function prediction only	--	--	S	Function unknown	Retrovirus-related Pol polyprotein from transposon TNT 1-94 [Cajanus cajan]	--	--
Medtr2g086530.JCVIMt4.0v1	c36587.graph_c0	101	24.05	31.67	7.57	1.05e-07	up	1.52504	--	--	Molecular Function: hydrolase activity, hydrolyzing O-glycosyl compounds (GO:0004553);; Cellular Component: nucleus (GO:0005634);; Cellular Component: cytoplasm (GO:0005737);; Biological Process: carbohydrate metabolic process (GO:0005975);; Cellular Component: integral component of membrane (GO:0016021);; Molecular Function: polysaccharide binding (GO:0030247);; Cellular Component: anchored comp…	--	--	--	Glycosyl hydrolases family 17	Glucan endo-1,3-beta-glucosidase 14 OS=Arabidopsis thaliana OX=3702 GN=At2g27500 PE=1 SV=2	G	Carbohydrate transport and metabolism	glycoside hydrolase family 17 protein [Medicago truncatula]	molecular function: catalytic activity (GO:0003824);; cellular component: cell (GO:0005623);; cellular component: organelle (GO:0043226);; cellular component: cell part (GO:0044464);; biological process: metabolic process (GO:0008152);; cellular component: membrane (GO:0016020);; cellular component: membrane part (GO:0044425);; molecular function: binding (GO:0005488)	--
Medtr4g079500.JCVIMt4.0v1	c50135.graph_c1	125.67	4	41	1.39	1.3e-08	up	1.5247	--	--	Molecular Function: transcription factor activity, sequence-specific DNA binding (GO:0003700);; Biological Process: regulation of transcription, DNA-templated (GO:0006355);; Molecular Function: sequence-specific DNA binding (GO:0043565);;	--	--	--	bZIP transcription factor;; Basic region leucine zipper;; bZIP Maf transcription factor	Basic leucine zipper 34 OS=Arabidopsis thaliana OX=3702 GN=BZIP34 PE=1 SV=1	K	Transcription	bZIP family transcription factor [Medicago truncatula]	biological process: biological regulation (GO:0065007);; molecular function: nucleic acid binding transcription factor activity (GO:0001071);; molecular function: binding (GO:0005488)	--
Medtr2g086530.JCVIMt4.0v1	c53393.graph_c0	720.33	8.83	247	2.7	7.61e-33	up	1.52301	--	--	Molecular Function: hydrolase activity, hydrolyzing O-glycosyl compounds (GO:0004553);; Biological Process: carbohydrate metabolic process (GO:0005975);; Cellular Component: integral component of membrane (GO:0016021);; Molecular Function: polysaccharide binding (GO:0030247);; Cellular Component: anchored component of plasma membrane (GO:0046658);;	--	--	--	Glycosyl hydrolases family 17	Glucan endo-1,3-beta-glucosidase 14 OS=Arabidopsis thaliana OX=3702 GN=At2g27500 PE=1 SV=2	G	Carbohydrate transport and metabolism	glycoside hydrolase family 17 protein [Medicago truncatula]	molecular function: catalytic activity (GO:0003824);; biological process: metabolic process (GO:0008152);; cellular component: membrane (GO:0016020);; cellular component: membrane part (GO:0044425);; molecular function: binding (GO:0005488);; cellular component: cell (GO:0005623);; cellular component: cell part (GO:0044464)	--
Medtr4g123080.JCVIMt4.0v1	c44071.graph_c0	1020	55.19	353.33	18.31	1.64e-29	up	1.52234	[T]	Signal transduction mechanisms	Molecular Function: protein serine/threonine phosphatase activity (GO:0004722);; Biological Process: protein dephosphorylation (GO:0006470);; Molecular Function: metal ion binding (GO:0046872);;	K14803|0|cam:101489551|K14803 protein phosphatase PTC2/3 [EC:3.1.3.16] | (RefSeq) probable protein phosphatase 2C 13	[T]	Signal transduction mechanisms	Protein phosphatase 2C	Probable protein phosphatase 2C 13 OS=Arabidopsis thaliana OX=3702 GN=At1g48040 PE=2 SV=2	T	Signal transduction mechanisms	protein phosphatase 2C-like protein [Medicago truncatula]	biological process: metabolic process (GO:0008152);; biological process: cellular process (GO:0009987);; molecular function: catalytic activity (GO:0003824);; molecular function: binding (GO:0005488)	--
Medtr4g106720.JCVIMt4.0v1	c31792.graph_c0	46.33	2.15	13.33	0.59	5.29e-05	up	1.52063	--	--	Cellular Component: integral component of membrane (GO:0016021);; Molecular Function: transmembrane transporter activity (GO:0022857);; Biological Process: transmembrane transport (GO:0055085);;	--	--	--	EamA-like transporter family	WAT1-related protein At5g40240 OS=Arabidopsis thaliana OX=3702 GN=At5g40240 PE=2 SV=1	S	Function unknown	nodulin MtN21/EamA-like transporter family protein [Medicago truncatula]	cellular component: membrane (GO:0016020);; cellular component: membrane part (GO:0044425);; biological process: localization (GO:0051179);; molecular function: transporter activity (GO:0005215)	--
Medtr6g065400.JCVIMt4.0v1	c43037.graph_c0	662	27.53	229.33	9.3	3.27e-36	up	1.51731	[I]	Lipid transport and metabolism	Biological Process: metabolic process (GO:0008152);; Molecular Function: hydrolase activity (GO:0016787);;	--	[V]	Defense mechanisms	alpha/beta hydrolase fold;; Carboxylesterase family;; Steryl acetyl hydrolase	Probable carboxylesterase 18 OS=Arabidopsis thaliana OX=3702 GN=CXE18 PE=1 SV=1	I	Lipid transport and metabolism	carboxylesterase-like protein [Medicago truncatula]	biological process: metabolic process (GO:0008152);; molecular function: catalytic activity (GO:0003824)	--
Medtr4g087160.JCVIMt4.0v1	c40921.graph_c0	343.33	26.31	113.33	8.83	6.49e-16	up	1.51728	--	--	Cellular Component: chloroplast (GO:0009507);; Biological Process: embryo development ending in seed dormancy (GO:0009793);;	--	--	--	--	CCG-binding protein 1 OS=Arabidopsis thaliana OX=3702 GN=MEE14 PE=1 SV=1	S	Function unknown	maternal effect embryo arrest protein, putative [Medicago truncatula]	cellular component: cell (GO:0005623);; cellular component: organelle (GO:0043226);; cellular component: cell part (GO:0044464);; biological process: reproduction (GO:0000003);; biological process: reproductive process (GO:0022414);; biological process: multicellular organismal process (GO:0032501);; biological process: developmental process (GO:0032502);; biological process: single-organism proc…	--
Medtr1g022365.JCVIMt4.0v1	c33921.graph_c0	37.67	1.35	10	0.35	0.000245222	up	1.51643	--	--	--	--	--	--	--	--	S	Function unknown	hypothetical protein MTR_1g022365 [Medicago truncatula]	--	--
Medtr8g102270.JCVIMt4.0v1	c39671.graph_c0	172.67	7.86	58.33	3.03	1.06e-12	up	1.51621	--	--	--	--	--	--	Protein of unknown function (DUF1005)	--	S	Function unknown	hypothetical protein L195_g007663 [Trifolium pratense]	--	--
Medtr6g032880.JCVIMt4.0v1	c51039.graph_c0	1913.33	64.63	671	19.59	6.51e-55	up	1.51379	--	--	Molecular Function: catalytic activity (GO:0003824);; Biological Process: carbohydrate metabolic process (GO:0005975);; Cellular Component: chloroplast (GO:0009507);; Biological Process: photosynthetic electron transport in photosystem I (GO:0009773);; Biological Process: positive regulation of gene expression (GO:0010628);; Cellular Component: membrane (GO:0016020);; Molecular Function: carbohyd…	--	--	--	--	Protein NDH-DEPENDENT CYCLIC ELECTRON FLOW 5 OS=Arabidopsis thaliana OX=3702 GN=NDF5 PE=2 SV=1	S	Function unknown	NDH-dependent cyclic electron flow protein, putative [Medicago truncatula]	molecular function: catalytic activity (GO:0003824);; biological process: metabolic process (GO:0008152);; cellular component: cell (GO:0005623);; cellular component: organelle (GO:0043226);; cellular component: cell part (GO:0044464);; biological process: cellular process (GO:0009987);; biological process: single-organism process (GO:0044699);; biological process: biological regulation (GO:00650…	--
Medtr7g117405.JCVIMt4.0v1	c34472.graph_c0	22.67	3.75	5	0.8	0.00153968	up	1.51282	--	--	Biological Process: flavonoid biosynthetic process (GO:0009813);; Cellular Component: intracellular membrane-bounded organelle (GO:0043231);; Biological Process: flavonoid glucuronidation (GO:0052696);; Molecular Function: quercetin 3-O-glucosyltransferase activity (GO:0080043);; Molecular Function: quercetin 7-O-glucosyltransferase activity (GO:0080044);;	K13496|2.29873e-76|mtr:MTR_7g117405|K13496 UDP-glucosyl transferase 73C [EC:2.4.1.-] | (RefSeq) UDP-glucosyltransferase family protein	[GC]	--	--	UDP-glycosyltransferase 73C1 OS=Arabidopsis thaliana OX=3702 GN=UGT73C1 PE=2 SV=1	S	Function unknown	UDP-glucosyltransferase family protein [Medicago truncatula]	biological process: metabolic process (GO:0008152);; cellular component: cell (GO:0005623);; cellular component: organelle (GO:0043226);; cellular component: cell part (GO:0044464);; biological process: cellular process (GO:0009987);; biological process: single-organism process (GO:0044699);; molecular function: catalytic activity (GO:0003824)	--
--	c38269.graph_c0	3013.67	288.14	1058	94.56	2.37e-54	up	1.51173	--	--	--	--	--	--	--	--	--	--	hypothetical protein TSUD_59670 [Trifolium subterraneum]	--	--
Medtr8g011780.JCVIMt4.0v1	c45787.graph_c0	321	14.15	106.33	4.6	8.01e-15	up	1.51075	[U]	Intracellular trafficking, secretion, and vesicular transport	Molecular Function: protein serine/threonine kinase activity (GO:0004674);; Molecular Function: ATP binding (GO:0005524);; Cellular Component: nucleus (GO:0005634);; Cellular Component: cytoplasm (GO:0005737);; Cellular Component: plasma membrane (GO:0005886);; Biological Process: protein phosphorylation (GO:0006468);; Biological Process: intracellular signal transduction (GO:0035556);;	K20714|0|mtr:MTR_8g011780|K20714 serine/threonine-protein kinase OXI1 [EC:2.7.11.1] | (RefSeq) Serine/Threonine-kinase OXI1-like protein	[R]	General function prediction only	Protein kinase domain;; Protein tyrosine kinase	Serine/threonine-protein kinase OXI1 OS=Arabidopsis thaliana OX=3702 GN=OXI1 PE=1 SV=1	T	Signal transduction mechanisms	Serine/Threonine-kinase OXI1-like protein [Medicago truncatula]	biological process: metabolic process (GO:0008152);; biological process: cellular process (GO:0009987);; molecular function: catalytic activity (GO:0003824);; molecular function: binding (GO:0005488);; cellular component: cell (GO:0005623);; cellular component: organelle (GO:0043226);; cellular component: cell part (GO:0044464);; cellular component: membrane (GO:0016020);; biological process: sig…	--
Medtr8g102620.JCVIMt4.0v1	c40201.graph_c0	3993.33	99.36	1388	34.2	1.34e-37	up	1.50713	[C]	Energy production and conversion	Molecular Function: malate dehydrogenase (decarboxylating) (NAD+) activity (GO:0004471);; Biological Process: malate metabolic process (GO:0006108);; Molecular Function: metal ion binding (GO:0046872);; Molecular Function: NAD binding (GO:0051287);; Biological Process: oxidation-reduction process (GO:0055114);;	K00029|0|mtr:MTR_8g102620|K00029 malate dehydrogenase (oxaloacetate-decarboxylating)(NADP+) [EC:1.1.1.40] | (RefSeq) NADP-dependent malic enzyme-like protein	[C]	Energy production and conversion	Malic enzyme, NAD binding domain;; Malic enzyme, N-terminal domain	NADP-dependent malic enzyme OS=Vitis vinifera OX=29760 PE=2 SV=1	C	Energy production and conversion	NADP-dependent malic enzyme-like protein [Medicago truncatula]	biological process: metabolic process (GO:0008152);; biological process: single-organism process (GO:0044699);; molecular function: catalytic activity (GO:0003824);; biological process: cellular process (GO:0009987);; molecular function: binding (GO:0005488)	Pyruvate metabolism (ko00620);; Carbon fixation in photosynthetic organisms (ko00710);; Carbon metabolism (ko01200)
Medtr0204s0020.JCVIMt4.0v1	c37310.graph_c0	59	5.58	17.33	1.68	1.63e-05	up	1.507	[G]	Carbohydrate transport and metabolism	Molecular Function: sugar:proton symporter activity (GO:0005351);; Molecular Function: glucose transmembrane transporter activity (GO:0005355);; Cellular Component: integral component of plasma membrane (GO:0005887);; Biological Process: proton transport (GO:0015992);; Biological Process: glucose import (GO:0046323);; Biological Process: glucose transmembrane transport (GO:1904659);;	--	[R]	General function prediction only	Sugar (and other) transporter;; Major Facilitator Superfamily	Sugar transport protein 7 OS=Arabidopsis thaliana OX=3702 GN=STP7 PE=1 SV=1	G	Carbohydrate transport and metabolism	sugar porter (SP) family MFS transporter [Medicago truncatula]	biological process: single-organism process (GO:0044699);; biological process: localization (GO:0051179);; molecular function: transporter activity (GO:0005215);; cellular component: cell (GO:0005623);; cellular component: membrane (GO:0016020);; cellular component: membrane part (GO:0044425);; cellular component: cell part (GO:0044464)	--
Medtr2g029520.JCVIMt4.0v1	c36424.graph_c0	140.67	10.02	46.67	3.26	4.38e-10	up	1.50665	--	--	Cellular Component: cytoplasm (GO:0005737);; Biological Process: protein phosphorylation (GO:0006468);; Biological Process: cell death (GO:0008219);; Biological Process: response to salicylic acid (GO:0009751);; Biological Process: defense response to bacterium, incompatible interaction (GO:0009816);; Molecular Function: sphingosine transmembrane transporter activity (GO:0010175);; Biological Pro…	--	[S]	Function unknown	Glycolipid transfer protein (GLTP)	Accelerated cell death 11 OS=Arabidopsis thaliana OX=3702 GN=ACD11 PE=1 SV=1	U	Intracellular trafficking, secretion, and vesicular transport	glycolipid transfer protein [Medicago truncatula]	cellular component: cell (GO:0005623);; cellular component: cell part (GO:0044464);; biological process: metabolic process (GO:0008152);; biological process: cellular process (GO:0009987);; biological process: single-organism process (GO:0044699);; biological process: response to stimulus (GO:0050896);; biological process: immune system process (GO:0002376);; biological process: multi-organism pr…	--
Medtr1g105700.JCVIMt4.0v1	c44254.graph_c0	162.33	16.94	52	5.41	2.52e-09	up	1.50571	[T]	Signal transduction mechanisms	Molecular Function: protein serine/threonine kinase activity (GO:0004674);; Molecular Function: transmembrane receptor protein tyrosine kinase activity (GO:0004714);; Molecular Function: ATP binding (GO:0005524);; Cellular Component: plasma membrane (GO:0005886);; Cellular Component: plasmodesma (GO:0009506);; Cellular Component: integral component of membrane (GO:0016021);; Biological Process: p…	K04733|9.72652e-165|mtr:MTR_1g105700|K04733 interleukin-1 receptor-associated kinase 4 [EC:2.7.11.1] | (RefSeq) cysteine-rich receptor-kinase-like protein	--	--	Protein kinase domain;; Protein tyrosine kinase	Cysteine-rich receptor-like protein kinase 10 OS=Arabidopsis thaliana OX=3702 GN=CRK10 PE=1 SV=3	T	Signal transduction mechanisms	cysteine-rich receptor-kinase-like protein [Medicago truncatula]	biological process: metabolic process (GO:0008152);; biological process: cellular process (GO:0009987);; molecular function: catalytic activity (GO:0003824);; biological process: signaling (GO:0023052);; biological process: single-organism process (GO:0044699);; biological process: response to stimulus (GO:0050896);; biological process: biological regulation (GO:0065007);; molecular function: sig…	--
Medtr2g059540.JCVIMt4.0v1	c35344.graph_c0	32.67	3.7	8.33	0.94	0.000527238	up	1.50528	--	--	Biological Process: regulation of transcription, DNA-templated (GO:0006355);; Molecular Function: transcription regulatory region DNA binding (GO:0044212);;	--	--	--	Dof domain, zinc finger	Dof zinc finger protein DOF1.7 OS=Arabidopsis thaliana OX=3702 GN=DOF1.7 PE=2 SV=1	S	Function unknown	Dof domain zinc finger protein [Medicago truncatula]	biological process: biological regulation (GO:0065007);; molecular function: binding (GO:0005488)	--
Medtr3g008160.JCVIMt4.0v1	c45873.graph_c0	66	1.65	20.33	0.5	4.4e-06	up	1.50515	--	--	Cellular Component: integral component of membrane (GO:0016021);; Molecular Function: substrate-specific transmembrane transporter activity (GO:0022891);; Biological Process: transmembrane transport (GO:0055085);;	--	[R]	General function prediction only	Sugar (and other) transporter	Hexose carrier protein HEX6 OS=Ricinus communis OX=3988 GN=HEX6 PE=2 SV=1	G	Carbohydrate transport and metabolism	sugar porter (SP) family MFS transporter [Medicago truncatula]	cellular component: membrane (GO:0016020);; cellular component: membrane part (GO:0044425);; biological process: localization (GO:0051179);; molecular function: transporter activity (GO:0005215)	--
Medtr7g034345.JCVIMt4.0v1	c41298.graph_c1	28.67	4.43	7.33	1.18	0.000622004	up	1.50489	--	--	Molecular Function: uroporphyrin-III C-methyltransferase activity (GO:0004851);; Biological Process: siroheme biosynthetic process (GO:0019354);; Biological Process: methylation (GO:0032259);; Biological Process: oxidation-reduction process (GO:0055114);;	--	[H]	Coenzyme transport and metabolism	--	--	H	Coenzyme transport and metabolism	uroporphyrinogen-III C-methyltransferase [Medicago truncatula]	biological process: metabolic process (GO:0008152);; molecular function: catalytic activity (GO:0003824);; biological process: cellular process (GO:0009987);; biological process: single-organism process (GO:0044699)	--
Medtr4g113280.JCVIMt4.0v1	c46508.graph_c0	2029.33	109.58	715.67	36.13	1.74e-43	up	1.50443	[Q]	Secondary metabolites biosynthesis, transport and catabolism	Biological Process: fatty acid biosynthetic process (GO:0006633);; Cellular Component: integral component of membrane (GO:0016021);; Molecular Function: transferase activity, transferring acyl groups other than amino-acyl groups (GO:0016747);;	K15397|0|mtr:MTR_4g113280|K15397 3-ketoacyl-CoA synthase [EC:2.3.1.199] | (RefSeq) 3-ketoacyl-CoA synthase-like protein	--	--	FAE1/Type III polyketide synthase-like protein;; 3-Oxoacyl-[acyl-carrier-protein (ACP)] synthase III C terminal;; Chalcone and stilbene synthases, C-terminal domain;; Chalcone and stilbene synthases, N-terminal domain	3-ketoacyl-CoA synthase 11 OS=Arabidopsis thaliana OX=3702 GN=KCS11 PE=1 SV=1	I	Lipid transport and metabolism	3-ketoacyl-CoA synthase-like protein [Medicago truncatula]	biological process: metabolic process (GO:0008152);; biological process: cellular process (GO:0009987);; biological process: single-organism process (GO:0044699);; cellular component: membrane (GO:0016020);; cellular component: membrane part (GO:0044425);; molecular function: catalytic activity (GO:0003824)	Fatty acid elongation (ko00062)
Medtr1g115400.JCVIMt4.0v1	c7094.graph_c0	39.33	1.36	11	0.36	0.000214424	up	1.50383	--	--	--	--	--	--	F-box domain	F-box protein At2g39490 OS=Arabidopsis thaliana OX=3702 GN=At2g39490 PE=2 SV=1	S	Function unknown	F-box plant-like protein [Medicago truncatula]	--	--
Medtr1g070365.JCVIMt4.0v1	c51707.graph_c0	908.67	33.38	319.67	11.48	8.3e-33	up	1.50327	[QV]	Secondary metabolites biosynthesis, transport and catabolism ;; Defense mechanisms	Molecular Function: monooxygenase activity (GO:0004497);; Molecular Function: iron ion binding (GO:0005506);; Cellular Component: endoplasmic reticulum membrane (GO:0005789);; Cellular Component: integral component of membrane (GO:0016021);; Molecular Function: oxidoreductase activity, acting on paired donors, with incorporation or reduction of molecular oxygen (GO:0016705);; Molecular Function: …	K20768|0|mtr:MTR_1g070345|K20768 cytochrome P450 family 94 subfamily A polypeptide 2 | (RefSeq) cytochrome P450 family-dependent fatty acid hydroxylase	[QI]	--	Cytochrome P450	Cytochrome P450 94A2 OS=Vicia sativa OX=3908 GN=CYP94A2 PE=2 SV=1	Q	Secondary metabolites biosynthesis, transport and catabolism	cytochrome P450 family-dependent fatty acid hydroxylase [Medicago truncatula]	biological process: metabolic process (GO:0008152);; biological process: single-organism process (GO:0044699);; molecular function: catalytic activity (GO:0003824);; molecular function: binding (GO:0005488);; cellular component: cell (GO:0005623);; cellular component: membrane (GO:0016020);; cellular component: organelle (GO:0043226);; cellular component: organelle part (GO:0044422);; cellular co…	Cutin, suberine and wax biosynthesis (ko00073)
Medtr8g040170.JCVIMt4.0v1	c33268.graph_c0	58.33	6.97	17	2.04	5.09e-05	up	1.50187	--	--	Molecular Function: ATP binding (GO:0005524);; Cellular Component: integral component of membrane (GO:0016021);; Molecular Function: ATPase activity, coupled to transmembrane movement of substances (GO:0042626);; Biological Process: transmembrane transport (GO:0055085);;	K05666|5.58117e-49|mtr:MTR_8g040170|K05666 ATP-binding cassette, subfamily C (CFTR/MRP), member 2 | (RefSeq) ABC transporter-like family-protein	[Q]	Secondary metabolites biosynthesis, transport and catabolism	--	ABC transporter C family member 8 OS=Arabidopsis thaliana OX=3702 GN=ABCC8 PE=2 SV=3	V	Defense mechanisms	ABC transporter-like family-protein [Medicago truncatula]	molecular function: binding (GO:0005488);; cellular component: membrane (GO:0016020);; cellular component: membrane part (GO:0044425);; biological process: localization (GO:0051179);; molecular function: catalytic activity (GO:0003824);; molecular function: transporter activity (GO:0005215)	--
Medtr2g025580.JCVIMt4.0v1	c44473.graph_c0	413.33	25.22	143.67	8.6	2.6e-24	up	1.50072	--	--	Molecular Function: electron carrier activity (GO:0009055);; Cellular Component: integral component of membrane (GO:0016021);; Cellular Component: anchored component of plasma membrane (GO:0046658);;	--	--	--	Plastocyanin-like domain	Uclacyanin 1 OS=Arabidopsis thaliana OX=3702 GN=UCC1 PE=1 SV=1	S	Function unknown	blue copper-like protein [Medicago truncatula]	molecular function: electron carrier activity (GO:0009055);; cellular component: membrane (GO:0016020);; cellular component: membrane part (GO:0044425);; cellular component: cell (GO:0005623);; cellular component: cell part (GO:0044464)	--
Medtr4g094440.JCVIMt4.0v1	c50093.graph_c0	481.33	15.87	163	5.34	1.26e-17	up	1.49991	[K]	Transcription	--	--	--	--	Leucine rich repeat N-terminal domain;; Leucine rich repeat	Polygalacturonase inhibitor 2 OS=Phaseolus vulgaris OX=3885 GN=PGIP2 PE=1 SV=1	S	Function unknown	polygalacturonase inhibitor protein [Medicago truncatula]	--	--
Medtr8g015040.JCVIMt4.0v1	c39517.graph_c0	391	13.01	128.67	4.38	1.54e-13	up	1.49975	--	--	Molecular Function: protein serine/threonine kinase activity (GO:0004674);; Molecular Function: ATP binding (GO:0005524);; Biological Process: protein phosphorylation (GO:0006468);; Cellular Component: integral component of membrane (GO:0016021);;	--	--	--	Carbohydrate-binding protein of the ER;; Carbohydrate-binding protein of the ER	Putative leucine-rich repeat receptor-like protein kinase At2g19210 OS=Arabidopsis thaliana OX=3702 GN=At2g19210 PE=3 SV=1	T	Signal transduction mechanisms	LRR receptor-like kinase plant [Medicago truncatula]	biological process: metabolic process (GO:0008152);; biological process: cellular process (GO:0009987);; molecular function: catalytic activity (GO:0003824);; molecular function: binding (GO:0005488);; cellular component: membrane (GO:0016020);; cellular component: membrane part (GO:0044425)	--
Medtr1g050340.JCVIMt4.0v1	c50897.graph_c0	918.67	21.73	320	11.29	3e-33	up	1.49632	[T]	Signal transduction mechanisms	--	--	[R]	General function prediction only	WD domain, G-beta repeat;; Anaphase-promoting complex subunit 4 WD40 domain;; LisH	Transcriptional corepressor LEUNIG_HOMOLOG OS=Arabidopsis thaliana OX=3702 GN=LUH PE=1 SV=1	K	Transcription	transcriptional corepressor leunig-like protein [Medicago truncatula]	--	--
Medtr3g093780.JCVIMt4.0v1	c47265.graph_c1	454	8.48	125.67	2.43	7.48e-05	up	1.49522	--	--	--	--	--	--	Probable zinc-ribbon domain	Protein ENHANCED DISEASE RESISTANCE 4 OS=Arabidopsis thaliana OX=3702 GN=EDR4 PE=1 SV=1	S	Function unknown	DUF3133 family protein [Medicago truncatula]	--	--
Medtr6g012830.JCVIMt4.0v1	c35314.graph_c0	132.67	7.53	10.67	0.63	0.00417338	up	1.49187	--	--	--	--	--	--	Protein of unknown function (DUF1997)	--	S	Function unknown	DUF1997 family protein [Medicago truncatula]	--	--
Medtr5g048550.JCVIMt4.0v1	c43739.graph_c2	547.33	24.87	186	13.38	6.74e-19	up	1.49016	[Q]	Secondary metabolites biosynthesis, transport and catabolism	Molecular Function: metal ion binding (GO:0046872);; Molecular Function: dioxygenase activity (GO:0051213);; Biological Process: oxidation-reduction process (GO:0055114);;	--	[QR]	--	2OG-Fe(II) oxygenase superfamily;; non-haem dioxygenase in morphine synthesis N-terminal	Probable 2-oxoglutarate/Fe(II)-dependent dioxygenase OS=Papaver somniferum OX=3469 GN=DIOX2 PE=2 SV=1	S	Function unknown	PREDICTED: probable 2-oxoglutarate/Fe(II)-dependent dioxygenase [Cicer arietinum]	molecular function: binding (GO:0005488);; biological process: metabolic process (GO:0008152);; biological process: single-organism process (GO:0044699);; molecular function: catalytic activity (GO:0003824)	--
Medtr1g107490.JCVIMt4.0v1	c37213.graph_c0	3678	275.98	1323.33	96.74	3.51e-70	up	1.48967	--	--	Cellular Component: chloroplast thylakoid membrane (GO:0009535);; Cellular Component: integral component of membrane (GO:0016021);;	--	--	--	--	Stress enhanced protein 1, chloroplastic OS=Arabidopsis thaliana OX=3702 GN=SEP1 PE=2 SV=1	S	Function unknown	stress enhanced protein [Medicago truncatula]	cellular component: cell (GO:0005623);; cellular component: membrane (GO:0016020);; cellular component: organelle (GO:0043226);; cellular component: organelle part (GO:0044422);; cellular component: cell part (GO:0044464);; cellular component: membrane part (GO:0044425)	--
--	c42344.graph_c0	87.67	5.87	28.33	2.42	7.27e-07	up	1.48946	--	--	--	--	--	--	--	--	--	--	PREDICTED: uncharacterized protein LOC101489396 [Cicer arietinum]	--	--
Medtr3g073780.JCVIMt4.0v1	c50286.graph_c0	539.33	10.5	188	3.48	5.16e-26	up	1.48816	[P]	Inorganic ion transport and metabolism	Cellular Component: integral component of plasma membrane (GO:0005887);; Molecular Function: secondary active sulfate transmembrane transporter activity (GO:0008271);; Biological Process: sulfate transmembrane transport (GO:1902358);;	K17470|0|mtr:MTR_3g073780|K17470 sulfate transporter 1, high-affinity | (RefSeq) high affinity sulfate transporter type 1	[P]	Inorganic ion transport and metabolism	Sulfate permease family	Sulfate transporter 1.3 OS=Arabidopsis thaliana OX=3702 GN=SULTR1;3 PE=2 SV=1	P	Inorganic ion transport and metabolism	high affinity sulfate transporter type 1 [Medicago truncatula]	cellular component: cell (GO:0005623);; cellular component: membrane (GO:0016020);; cellular component: membrane part (GO:0044425);; cellular component: cell part (GO:0044464);; biological process: single-organism process (GO:0044699);; biological process: localization (GO:0051179);; molecular function: transporter activity (GO:0005215)	--
Medtr4g069250.JCVIMt4.0v1	c41236.graph_c0	218	10.09	74.33	3.43	9.26e-14	up	1.48783	[C]	Energy production and conversion	Cellular Component: plasma membrane (GO:0005886);; Molecular Function: FMN binding (GO:0010181);; Molecular Function: oxidoreductase activity (GO:0016491);; Biological Process: negative regulation of transcription, DNA-templated (GO:0045892);; Biological Process: oxidation-reduction process (GO:0055114);;	K03809|7.80612e-153|mtr:MTR_4g069250|K03809 NAD(P)H dehydrogenase (quinone) [EC:1.6.5.2] | (RefSeq) NAD(P)H:quinone oxidoreductase, type IV protein	[R]	General function prediction only	NADPH-dependent FMN reductase;; Flavodoxin;; Flavodoxin-like fold	Probable NAD(P)H dehydrogenase (quinone) FQR1-like 2 OS=Arabidopsis thaliana OX=3702 GN=At4g36750 PE=1 SV=1	S	Function unknown	NAD(P)H:quinone oxidoreductase, type IV protein [Medicago truncatula]	cellular component: cell (GO:0005623);; cellular component: membrane (GO:0016020);; cellular component: cell part (GO:0044464);; molecular function: binding (GO:0005488);; biological process: metabolic process (GO:0008152);; biological process: single-organism process (GO:0044699);; molecular function: catalytic activity (GO:0003824);; biological process: biological regulation (GO:0065007)	Ubiquinone and other terpenoid-quinone biosynthesis (ko00130)
Medtr3g451080.JCVIMt4.0v1	c39686.graph_c2	64.33	2.23	18	0.64	9.89e-05	up	1.48274	--	--	--	--	--	--	--	--	--	--	--	--	--
Medtr7g051650.JCVIMt4.0v1	c49198.graph_c1	4053	158.28	1457.33	58.9	2.85e-45	up	1.48051	[G]	Carbohydrate transport and metabolism	Molecular Function: hydrolase activity, hydrolyzing O-glycosyl compounds (GO:0004553);; Biological Process: carbohydrate metabolic process (GO:0005975);;	K01188|0|mtr:MTR_7g051650|K01188 beta-glucosidase [EC:3.2.1.21] | (RefSeq) glycoside hydrolase family 1 protein	[G]	Carbohydrate transport and metabolism	Glycosyl hydrolase family 1	Furostanol glycoside 26-O-beta-glucosidase OS=Cheilocostus speciosus OX=49577 GN=F26G PE=1 SV=1	G	Carbohydrate transport and metabolism	glycoside hydrolase family 1 protein [Medicago truncatula]	molecular function: catalytic activity (GO:0003824);; biological process: metabolic process (GO:0008152)	Cyanoamino acid metabolism (ko00460);; Starch and sucrose metabolism (ko00500);; Phenylpropanoid biosynthesis (ko00940)
Medtr8g089975.JCVIMt4.0v1	c33830.graph_c0	23.67	3.75	5.67	0.8	0.00130131	up	1.48	--	--	--	--	[T]	Signal transduction mechanisms	--	Abscisic acid-inducible protein kinase (Fragment) OS=Triticum aestivum OX=4565 PE=2 SV=1	--	--	Serine/threonine-protein kinase SAPK10 [Apostasia shenzhenica]	--	--
Medtr2g068650.JCVIMt4.0v1	c35424.graph_c0	23.67	2.44	5.67	0.58	0.00150825	up	1.47414	--	--	Molecular Function: protein serine/threonine kinase activity (GO:0004674);; Molecular Function: ATP binding (GO:0005524);; Cellular Component: plasma membrane (GO:0005886);; Biological Process: protein phosphorylation (GO:0006468);; Cellular Component: integral component of membrane (GO:0016021);;	--	--	--	--	G-type lectin S-receptor-like serine/threonine-protein kinase LECRK3 OS=Oryza sativa subsp. japonica OX=39947 GN=LECRK3 PE=3 SV=2	T	Signal transduction mechanisms	malectin/receptor-like kinase family protein [Medicago truncatula]	biological process: metabolic process (GO:0008152);; biological process: cellular process (GO:0009987);; molecular function: catalytic activity (GO:0003824);; molecular function: binding (GO:0005488);; cellular component: cell (GO:0005623);; cellular component: membrane (GO:0016020);; cellular component: cell part (GO:0044464);; cellular component: membrane part (GO:0044425)	--
Medtr4g128690.JCVIMt4.0v1	c37776.graph_c0	146.67	5.21	49.67	1.71	5.03e-09	up	1.47353	[G]	Carbohydrate transport and metabolism	Biological Process: phenylpropanoid metabolic process (GO:0009698);; Biological Process: flavonoid biosynthetic process (GO:0009813);; Cellular Component: intracellular membrane-bounded organelle (GO:0043231);; Biological Process: flavonoid glucuronidation (GO:0052696);; Molecular Function: quercetin 3-O-glucosyltransferase activity (GO:0080043);; Molecular Function: quercetin 7-O-glucosyltransfe…	--	[GC]	--	UDP-glucoronosyl and UDP-glucosyl transferase	Flavonoid 3-O-glucosyltransferase OS=Medicago truncatula OX=3880 GN=UGT78G1 PE=1 SV=1	S	Function unknown	flavonoid glucosyltransferase [Medicago truncatula]	biological process: metabolic process (GO:0008152);; biological process: cellular process (GO:0009987);; biological process: single-organism process (GO:0044699);; cellular component: cell (GO:0005623);; cellular component: organelle (GO:0043226);; cellular component: cell part (GO:0044464);; molecular function: catalytic activity (GO:0003824)	--
Medtr5g091975.JCVIMt4.0v1	c47437.graph_c0	192.33	9.47	65	3.81	2.37e-11	up	1.47269	--	--	--	--	--	--	--	--	--	--	F-box/RNI/FBD-like domain protein [Medicago truncatula]	--	--
Medtr4g094770.JCVIMt4.0v1	c33269.graph_c0	89.67	2.06	10.67	0.29	0.00490306	up	1.47039	--	--	Molecular Function: binding (GO:0005488);;	K09338|3.50785e-114|pvu:PHAVU_007G101200g|K09338 homeobox-leucine zipper protein | (RefSeq) hypothetical protein	--	--	START domain	Homeobox-leucine zipper protein ROC8 OS=Oryza sativa subsp. japonica OX=39947 GN=ROC8 PE=2 SV=2	--	--	hypothetical protein PHAVU_007G101200g [Phaseolus vulgaris]	molecular function: binding (GO:0005488)	--
Medtr5g098980.JCVIMt4.0v1	c52394.graph_c0	103244	1198.85	37408.7	426.63	7.23e-80	up	1.46914	[H]	Coenzyme transport and metabolism	Cellular Component: cytosol (GO:0005829);; Molecular Function: O-methyltransferase activity (GO:0008171);; Biological Process: aromatic compound biosynthetic process (GO:0019438);; Molecular Function: quercetin 3-O-methyltransferase activity (GO:0030755);; Biological Process: methylation (GO:0032259);; Molecular Function: protein dimerization activity (GO:0046983);;	--	--	--	Protein of unknown function (DUF632);; O-methyltransferase;; Dimerisation domain	(R,S)-reticuline 7-O-methyltransferase OS=Papaver somniferum OX=3469 GN=7OMT PE=1 SV=1	S	Function unknown	BZIP transcription factor [Medicago truncatula]	cellular component: cell (GO:0005623);; cellular component: cell part (GO:0044464);; biological process: metabolic process (GO:0008152);; molecular function: catalytic activity (GO:0003824);; biological process: cellular process (GO:0009987);; molecular function: binding (GO:0005488)	--
Medtr2g017590.JCVIMt4.0v1	c53392.graph_c0	108.33	5.54	35	1.8	4.55e-07	up	1.46789	[G]	Carbohydrate transport and metabolism	Cellular Component: integral component of plasma membrane (GO:0005887);; Biological Process: water transport (GO:0006833);; Biological Process: cellular water homeostasis (GO:0009992);; Molecular Function: water channel activity (GO:0015250);; Molecular Function: glycerol channel activity (GO:0015254);; Biological Process: glycerol transport (GO:0015793);; Biological Process: ion transmembrane tr…	K09874|4.95913e-162|mtr:MTR_8g087710|K09874 aquaporin NIP | (RefSeq) major intrinsic protein (MIP) family transporter	[G]	Carbohydrate transport and metabolism	Major intrinsic protein	Nodulin-26 OS=Glycine max OX=3847 PE=1 SV=2	G	Carbohydrate transport and metabolism	major intrinsic protein (MIP) family transporter [Medicago truncatula]	cellular component: cell (GO:0005623);; cellular component: membrane (GO:0016020);; cellular component: membrane part (GO:0044425);; cellular component: cell part (GO:0044464);; biological process: single-organism process (GO:0044699);; biological process: localization (GO:0051179);; biological process: cellular process (GO:0009987);; biological process: biological regulation (GO:0065007);; biolo…	--
Medtr8g077830.JCVIMt4.0v1	c46712.graph_c0	961	34.14	350.67	12.12	2.37e-22	up	1.46655	--	--	Cellular Component: integral component of membrane (GO:0016021);;	--	--	--	Sulfite exporter TauE/SafE	Sulfite exporter TauE/SafE family protein 3 OS=Arabidopsis thaliana OX=3702 GN=At2g25737 PE=2 SV=1	S	Function unknown	sulfite exporter TauE/SafE family protein [Medicago truncatula]	cellular component: membrane (GO:0016020);; cellular component: membrane part (GO:0044425)	--
Medtr0314s0030.JCVIMt4.0v1	c47901.graph_c1	261	10.39	89.67	4.04	6.65e-13	up	1.46488	[Q]	Secondary metabolites biosynthesis, transport and catabolism	Molecular Function: dioxygenase activity (GO:0051213);; Biological Process: oxidation-reduction process (GO:0055114);;	--	--	--	non-haem dioxygenase in morphine synthesis N-terminal	--	S	Function unknown	2OG-Fe(II) oxygenase family oxidoreductase [Medicago truncatula]	biological process: metabolic process (GO:0008152);; biological process: single-organism process (GO:0044699);; molecular function: catalytic activity (GO:0003824)	--
Medtr2g067980.JCVIMt4.0v1	c53482.graph_c0	716	23.48	248.33	8.22	4.63e-20	up	1.46298	--	--	Molecular Function: protein serine/threonine kinase activity (GO:0004674);; Molecular Function: ATP binding (GO:0005524);; Cellular Component: plasma membrane (GO:0005886);; Biological Process: protein phosphorylation (GO:0006468);; Cellular Component: integral component of membrane (GO:0016021);;	--	--	--	Thaumatin family;; D-mannose binding lectin	Thaumatin-like protein 1 OS=Arabidopsis thaliana OX=3702 GN=TLP1 PE=2 SV=1	T	Signal transduction mechanisms	lectin kinase family protein [Medicago truncatula]	biological process: metabolic process (GO:0008152);; biological process: cellular process (GO:0009987);; molecular function: catalytic activity (GO:0003824);; molecular function: binding (GO:0005488);; cellular component: cell (GO:0005623);; cellular component: membrane (GO:0016020);; cellular component: cell part (GO:0044464);; cellular component: membrane part (GO:0044425)	--
Medtr2g013010.JCVIMt4.0v1	c34048.graph_c0	265.67	7.84	11.67	0.37	0.00424422	up	1.46234	--	--	Molecular Function: catechol oxidase activity (GO:0004097);; Cellular Component: chloroplast (GO:0009507);; Cellular Component: thylakoid (GO:0009579);; Biological Process: pigment biosynthetic process (GO:0046148);; Molecular Function: metal ion binding (GO:0046872);; Biological Process: oxidation-reduction process (GO:0055114);;	K00422|0|mtr:MTR_2g013010|K00422 polyphenol oxidase [EC:1.10.3.1] | (RefSeq) polyphenoloxidase	--	--	Protein of unknown function (DUF_B2219);; Common central domain of tyrosinase;; Polyphenol oxidase middle domain	Polyphenol oxidase A1, chloroplastic OS=Vicia faba OX=3906 PE=1 SV=1	S	Function unknown	polyphenol oxidase [Medicago sativa]	biological process: metabolic process (GO:0008152);; biological process: single-organism process (GO:0044699);; molecular function: catalytic activity (GO:0003824);; cellular component: cell (GO:0005623);; cellular component: organelle (GO:0043226);; cellular component: cell part (GO:0044464);; molecular function: binding (GO:0005488)	Tyrosine metabolism (ko00350);; Isoquinoline alkaloid biosynthesis (ko00950)
Medtr7g034395.JCVIMt4.0v1	c46766.graph_c0	1304.33	63.16	471	22.38	2.51e-39	up	1.46139	[CR]	Energy production and conversion ;; General function prediction only	Molecular Function: zinc ion binding (GO:0008270);; Molecular Function: oxidoreductase activity (GO:0016491);; Biological Process: oxidation-reduction process (GO:0055114);;	K18980|4.40886e-143|mtr:MTR_7g034395|K18980 2-methylene-furan-3-one reductase [EC:1.3.1.105] | (RefSeq) zinc-binding dehydrogenase family oxidoreductase	[CR]	--	--	2-methylene-furan-3-one reductase OS=Fragaria vesca OX=57918 GN=EO PE=2 SV=2	C	Energy production and conversion	unknown [Medicago truncatula]	molecular function: binding (GO:0005488);; biological process: metabolic process (GO:0008152);; biological process: single-organism process (GO:0044699);; molecular function: catalytic activity (GO:0003824)	--
Medtr7g013820.JCVIMt4.0v1	c44518.graph_c0	77.33	2.66	25.33	0.86	1.02e-06	up	1.46125	--	--	Cellular Component: nucleus (GO:0005634);; Biological Process: negative regulation of abscisic acid-activated signaling pathway (GO:0009788);; Biological Process: regulation of starch biosynthetic process (GO:0010581);;	--	--	--	TPL-binding domain in jasmonate signalling;; Ethylene-responsive binding factor-associated repression;; Putative nuclear localisation signal	Ninja-family protein 1 OS=Triticum aestivum OX=4565 GN=AFP-A1 PE=3 SV=1	S	Function unknown	ABI five-binding protein [Medicago truncatula]	cellular component: cell (GO:0005623);; cellular component: organelle (GO:0043226);; cellular component: cell part (GO:0044464);; biological process: biological regulation (GO:0065007)	--
Medtr4g128590.JCVIMt4.0v1	c35441.graph_c0	257.33	15.15	84.33	4.98	8.94e-09	up	1.46016	--	--	Molecular Function: hydrolase activity, hydrolyzing O-glycosyl compounds (GO:0004553);; Cellular Component: cell wall (GO:0005618);; Biological Process: xyloglucan metabolic process (GO:0010411);; Molecular Function: xyloglucan:xyloglucosyl transferase activity (GO:0016762);; Biological Process: cell wall biogenesis (GO:0042546);; Cellular Component: apoplast (GO:0048046);; Biological Process: ce…	--	--	--	Xyloglucan endo-transglycosylase (XET) C-terminus;; Glycosyl hydrolases family 16	Probable xyloglucan endotransglucosylase/hydrolase protein 23 OS=Arabidopsis thaliana OX=3702 GN=XTH23 PE=2 SV=1	G	Carbohydrate transport and metabolism	PREDICTED: xyloglucan endotransglucosylase/hydrolase protein 22-like [Cicer arietinum]	molecular function: catalytic activity (GO:0003824);; cellular component: cell (GO:0005623);; cellular component: cell part (GO:0044464);; biological process: metabolic process (GO:0008152);; biological process: cellular process (GO:0009987);; biological process: cellular component organization or biogenesis (GO:0071840);; cellular component: extracellular region (GO:0005576)	--
--	c49411.graph_c0	22	2.22	5	0.34	0.00224202	up	1.4596	--	--	--	--	--	--	--	--	--	--	--	--	--
Medtr5g004720.JCVIMt4.0v1	c43339.graph_c0	471.33	8.61	170.67	3.04	2.6e-25	up	1.45726	[S]	Function unknown	Molecular Function: ATP binding (GO:0005524);; Molecular Function: transferase activity (GO:0016740);; Molecular Function: hydrolase activity (GO:0016787);; Biological Process: double-strand break repair via synthesis-dependent strand annealing (GO:0045003);; Biological Process: interaction with host (GO:0051701);;	K10875|0|mtr:MTR_5g004720|K10875 DNA repair and recombination protein RAD54 and RAD54-like protein [EC:3.6.4.-] | (RefSeq) DNA repair and recombination RAD54-like protein	[L]	Replication, recombination and repair	SNF2 family N-terminal domain;; Helicase conserved C-terminal domain;; Type III restriction enzyme, res subunit;; DEAD/DEAH box helicase	Protein CHROMATIN REMODELING 25 OS=Arabidopsis thaliana OX=3702 GN=CHR25 PE=1 SV=1	L	Replication, recombination and repair	DNA repair and recombination RAD54-like protein [Medicago truncatula]	molecular function: binding (GO:0005488);; molecular function: catalytic activity (GO:0003824);; biological process: metabolic process (GO:0008152);; biological process: cellular process (GO:0009987);; biological process: response to stimulus (GO:0050896);; biological process: multi-organism process (GO:0051704)	Homologous recombination (ko03440)
Medtr7g056450.JCVIMt4.0v1	c49873.graph_c0	47	1.57	12.33	0.43	0.000685125	up	1.4566	--	--	Molecular Function: protein serine/threonine kinase activity (GO:0004674);; Molecular Function: ATP binding (GO:0005524);; Biological Process: protein phosphorylation (GO:0006468);; Cellular Component: integral component of membrane (GO:0016021);; Molecular Function: carbohydrate binding (GO:0030246);; Biological Process: recognition of pollen (GO:0048544);;	--	--	--	S-locus glycoprotein domain;; D-mannose binding lectin;; PAN-like domain	G-type lectin S-receptor-like serine/threonine-protein kinase At1g11330 OS=Arabidopsis thaliana OX=3702 GN=At1g11330 PE=1 SV=3	T	Signal transduction mechanisms	S-locus lectin kinase family protein [Medicago truncatula]	biological process: metabolic process (GO:0008152);; biological process: cellular process (GO:0009987);; molecular function: catalytic activity (GO:0003824);; molecular function: binding (GO:0005488);; cellular component: membrane (GO:0016020);; cellular component: membrane part (GO:0044425);; biological process: reproduction (GO:0000003);; biological process: reproductive process (GO:0022414);; …	--
Medtr1g018640.JCVIMt4.0v1	c39850.graph_c0	988	115.35	353.67	38.51	3.39e-17	up	1.45599	--	--	--	--	--	--	--	--	--	--	gibberellin-regulated family protein [Medicago truncatula]	--	--
Medtr2g088080.JCVIMt4.0v1	c43392.graph_c0	331	9.31	117.33	3.31	2.1e-14	up	1.45598	[DPM]	Cell cycle control, cell division, chromosome partitioning ;; Inorganic ion transport and metabolism ;; Cell wall/membrane/envelope biogenesis	Molecular Function: copper ion binding (GO:0005507);; Molecular Function: L-ascorbate oxidase activity (GO:0008447);; Cellular Component: plant-type cell wall (GO:0009505);; Cellular Component: plasmodesma (GO:0009506);; Molecular Function: oxidoreductase activity, oxidizing metal ions (GO:0016722);; Biological Process: oxidation-reduction process (GO:0055114);;	--	[Q]	Secondary metabolites biosynthesis, transport and catabolism	Multicopper oxidase;; Multicopper oxidase;; Multicopper oxidase	L-ascorbate oxidase homolog OS=Brassica napus OX=3708 GN=Bp10 PE=2 SV=1	Q	Secondary metabolites biosynthesis, transport and catabolism	L-ascorbate oxidase-like protein [Medicago truncatula]	molecular function: binding (GO:0005488);; biological process: metabolic process (GO:0008152);; biological process: single-organism process (GO:0044699);; molecular function: catalytic activity (GO:0003824);; cellular component: cell (GO:0005623);; cellular component: cell part (GO:0044464);; cellular component: cell junction (GO:0030054);; cellular component: symplast (GO:0055044)	--
--	c27993.graph_c0	207.33	6.42	72.67	2.28	1.76e-11	up	1.45452	--	--	--	--	[R]	General function prediction only	gag-polypeptide of LTR copia-type;; Integrase core domain;; GAG-pre-integrase domain	Retrovirus-related Pol polyprotein from transposon RE2 OS=Arabidopsis thaliana OX=3702 GN=RE2 PE=4 SV=1	L	Replication, recombination and repair	hypothetical protein TSUD_418880 [Trifolium subterraneum]	--	--
Medtr4g088400.JCVIMt4.0v1	c49693.graph_c0	1298	41.98	476.67	17.61	4.04e-48	up	1.45117	[QV]	Secondary metabolites biosynthesis, transport and catabolism ;; Defense mechanisms	Molecular Function: iron ion binding (GO:0005506);; Cellular Component: integral component of membrane (GO:0016021);; Molecular Function: oxidoreductase activity, acting on paired donors, with incorporation or reduction of molecular oxygen, NAD(P)H as one donor, and incorporation of one atom of oxygen (GO:0016709);; Molecular Function: heme binding (GO:0020037);; Biological Process: secondary met…	K07408|0|mtr:MTR_4g088400|K07408 cytochrome P450 family 1 subfamily A polypeptide 1 [EC:1.14.14.1] | (RefSeq) cytochrome P450 family protein	[Q]	Secondary metabolites biosynthesis, transport and catabolism	Cytochrome P450	Cytochrome P450 82A4 OS=Glycine max OX=3847 GN=CYP82A4 PE=2 SV=1	Q	Secondary metabolites biosynthesis, transport and catabolism	cytochrome P450 family protein [Medicago truncatula]	molecular function: binding (GO:0005488);; cellular component: membrane (GO:0016020);; cellular component: membrane part (GO:0044425);; biological process: metabolic process (GO:0008152);; biological process: single-organism process (GO:0044699);; molecular function: catalytic activity (GO:0003824)	--
Medtr5g057990.JCVIMt4.0v1	c52489.graph_c0	840.67	21.6	311.67	7.62	2.49e-19	up	1.44921	[G]	Carbohydrate transport and metabolism	Biological Process: maltose metabolic process (GO:0000023);; Molecular Function: alpha-1,4-glucosidase activity (GO:0004558);; Molecular Function: carbohydrate binding (GO:0030246);; Molecular Function: maltose alpha-glucosidase activity (GO:0032450);;	K15925|0|mtr:MTR_5g057990|K15925 alpha-D-xyloside xylohydrolase [EC:3.2.1.177] | (RefSeq) alpha-glucosidase	[G]	Carbohydrate transport and metabolism	Glycosyl hydrolases family 31	Alpha-xylosidase 1 OS=Arabidopsis thaliana OX=3702 GN=XYL1 PE=1 SV=1	G	Carbohydrate transport and metabolism	alpha-glucosidase [Medicago truncatula]	biological process: metabolic process (GO:0008152);; biological process: cellular process (GO:0009987);; biological process: single-organism process (GO:0044699);; molecular function: catalytic activity (GO:0003824);; molecular function: binding (GO:0005488)	--
Medtr4g113750.JCVIMt4.0v1	c28103.graph_c0	53	6.23	16.67	1.87	8.56e-05	up	1.44577	--	--	Cellular Component: integral component of membrane (GO:0016021);; Molecular Function: heat shock protein binding (GO:0031072);; Molecular Function: unfolded protein binding (GO:0051082);;	--	--	--	--	--	S	Function unknown	transmembrane protein, putative [Medicago truncatula]	cellular component: membrane (GO:0016020);; cellular component: membrane part (GO:0044425);; molecular function: binding (GO:0005488)	--
Medtr1g492760.JCVIMt4.0v1	c48506.graph_c0	97.33	1.75	30.33	0.58	6.25e-06	up	1.44479	--	--	Molecular Function: DNA-(apurinic or apyrimidinic site) lyase activity (GO:0003906);; Biological Process: DNA repair (GO:0006281);; Biological Process: DNA methylation (GO:0006306);; Biological Process: regulation of gene expression by genetic imprinting (GO:0006349);; Biological Process: embryo development ending in seed dormancy (GO:0009793);; Molecular Function: DNA N-glycosylase activity (GO:…	--	--	--	--	Transcriptional activator DEMETER OS=Arabidopsis thaliana OX=3702 GN=DME PE=1 SV=2	L	Replication, recombination and repair	HhH-GPD base excision DNA repair family protein [Medicago truncatula]	molecular function: catalytic activity (GO:0003824);; biological process: metabolic process (GO:0008152);; biological process: cellular process (GO:0009987);; biological process: response to stimulus (GO:0050896);; biological process: biological regulation (GO:0065007);; biological process: reproduction (GO:0000003);; biological process: reproductive process (GO:0022414);; biological process: mul…	--
Medtr1g108460.JCVIMt4.0v1	c43616.graph_c0	585	17.17	204.33	5.83	1.77e-15	up	1.44415	--	--	Cellular Component: integral component of membrane (GO:0016021);;	--	--	--	--	--	S	Function unknown	transmembrane protein, putative [Medicago truncatula]	cellular component: membrane (GO:0016020);; cellular component: membrane part (GO:0044425)	--
Medtr7g068650.JCVIMt4.0v1	c36200.graph_c1	68.67	3.28	18.67	0.9	0.000900324	up	1.44167	[Q]	Secondary metabolites biosynthesis, transport and catabolism	Molecular Function: iron ion binding (GO:0005506);; Molecular Function: leucocyanidin oxygenase activity (GO:0050589);; Biological Process: oxidation-reduction process (GO:0055114);;	--	[QR]	--	non-haem dioxygenase in morphine synthesis N-terminal;; 2OG-Fe(II) oxygenase superfamily	Probable 2-oxoglutarate-dependent dioxygenase At5g05600 OS=Arabidopsis thaliana OX=3702 GN=At5g05600 PE=2 SV=1	S	Function unknown	leucoanthocyanidin dioxygenase-like protein [Medicago truncatula]	molecular function: binding (GO:0005488);; biological process: metabolic process (GO:0008152);; biological process: single-organism process (GO:0044699);; molecular function: catalytic activity (GO:0003824)	--
Medtr1g022235.JCVIMt4.0v1	c41731.graph_c0	22.33	0.61	5	0.13	0.00293791	up	1.43985	--	--	--	--	--	--	--	--	--	--	hypothetical protein TSUD_394130 [Trifolium subterraneum]	--	--
Medtr8g020670.JCVIMt4.0v1	c42411.graph_c0	904.33	67.77	326.67	24.38	6.59e-23	up	1.43885	--	--	Cellular Component: extracellular region (GO:0005576);; Cellular Component: cell wall (GO:0005618);; Molecular Function: manganese ion binding (GO:0030145);; Biological Process: oxalate metabolic process (GO:0033609);; Molecular Function: nutrient reservoir activity (GO:0045735);; Molecular Function: oxalate decarboxylase activity (GO:0046564);;	--	--	--	Cupin;; Cupin domain	Germin-like protein subfamily 3 member 1 OS=Arabidopsis thaliana OX=3702 GN=GLP1 PE=1 SV=1	S	Function unknown	germin family 3 protein [Medicago truncatula]	cellular component: extracellular region (GO:0005576);; cellular component: cell (GO:0005623);; cellular component: cell part (GO:0044464);; molecular function: binding (GO:0005488);; biological process: metabolic process (GO:0008152);; biological process: cellular process (GO:0009987);; biological process: single-organism process (GO:0044699);; molecular function: nutrient reservoir activity (GO…	--
Medtr3g063050.JCVIMt4.0v1	c49835.graph_c0	205	6.51	71.67	2.48	1.22e-10	up	1.43792	--	--	Molecular Function: uniporter activity (GO:0015292);; Cellular Component: integral component of membrane (GO:0016021);; Biological Process: transmembrane transport (GO:0055085);;	K20858|5.79703e-79|mtr:MTR_3g063050|K20858 calcium uniporter protein, mitochondrial | (RefSeq) transmembrane protein, putative	[R]	General function prediction only	Mitochondrial calcium uniporter	Calcium uniporter protein 5, mitochondrial OS=Arabidopsis thaliana OX=3702 GN=At1g57610 PE=2 SV=1	S	Function unknown	transmembrane protein, putative [Medicago truncatula]	biological process: localization (GO:0051179);; molecular function: transporter activity (GO:0005215);; cellular component: membrane (GO:0016020);; cellular component: membrane part (GO:0044425)	--
Medtr4g055520.JCVIMt4.0v1	c44715.graph_c0	2104	49.8	787.33	17.92	1.95e-30	up	1.43484	[N]	Cell motility	Cellular Component: Golgi apparatus (GO:0005794);; Biological Process: mucilage biosynthetic process (GO:0010192);; Cellular Component: integral component of membrane (GO:0016021);; Molecular Function: glucomannan 4-beta-mannosyltransferase activity (GO:0047259);; Biological Process: mucilage metabolic process involved in seed coat development (GO:0048359);; Molecular Function: mannan synthase ac…	K13680|0|mtr:MTR_4g055520|K13680 beta-mannan synthase [EC:2.4.1.32] | (RefSeq) cellulose synthase-like protein A1	--	--	Glycosyl transferase family group 2;; Glycosyltransferase like family 2;; Glycosyl transferase family 2;; Glycosyl transferase family 21	Glucomannan 4-beta-mannosyltransferase 2 OS=Arabidopsis thaliana OX=3702 GN=CSLA2 PE=2 SV=1	M	Cell wall/membrane/envelope biogenesis	cellulose synthase-like protein A1 [Medicago truncatula]	cellular component: cell (GO:0005623);; cellular component: organelle (GO:0043226);; cellular component: cell part (GO:0044464);; biological process: metabolic process (GO:0008152);; biological process: cellular process (GO:0009987);; cellular component: membrane (GO:0016020);; cellular component: membrane part (GO:0044425);; biological process: single-organism process (GO:0044699);; molecular fu…	--
Medtr5g015840.JCVIMt4.0v1	c38876.graph_c0	41.67	1.88	12.67	0.6	0.00020121	up	1.43076	--	--	--	--	[H]	Coenzyme transport and metabolism	Potential Queuosine, Q, salvage protein family	--	S	Function unknown	DUF2419 family protein [Medicago truncatula]	--	--
Medtr2g072270.JCVIMt4.0v1	c43753.graph_c0	54	6.07	16.67	1.8	0.000170185	up	1.42983	[QV]	Secondary metabolites biosynthesis, transport and catabolism ;; Defense mechanisms	Molecular Function: acyl-CoA oxidase activity (GO:0003997);; Molecular Function: iron ion binding (GO:0005506);; Cellular Component: integral component of membrane (GO:0016021);; Molecular Function: oxidoreductase activity, acting on paired donors, with incorporation or reduction of molecular oxygen, NAD(P)H as one donor, and incorporation of one atom of oxygen (GO:0016709);; Molecular Function: …	--	[QI]	--	Cytochrome P450	11-oxo-beta-amyrin 30-oxidase OS=Glycyrrhiza uralensis OX=74613 GN=CYP72A154 PE=1 SV=1	Q	Secondary metabolites biosynthesis, transport and catabolism	cytochrome P450 family monooxygenase [Medicago truncatula]	biological process: metabolic process (GO:0008152);; biological process: single-organism process (GO:0044699);; molecular function: catalytic activity (GO:0003824);; molecular function: binding (GO:0005488);; cellular component: membrane (GO:0016020);; cellular component: membrane part (GO:0044425);; biological process: cellular process (GO:0009987)	--
--	c33417.graph_c0	25.67	1.11	6.67	0.28	0.00182105	up	1.42964	--	--	--	--	--	--	--	--	--	--	--	--	--
--	c52362.graph_c2	113.67	2.6	38.67	0.89	6.98e-08	up	1.42912	--	--	--	--	--	--	--	--	--	--	hypothetical protein MTR_8g469580 [Medicago truncatula]	--	--
Medtr8g093540.JCVIMt4.0v1	c38805.graph_c0	82	2.57	27.67	0.82	7.99e-07	up	1.42614	[T]	Signal transduction mechanisms	Molecular Function: enzyme inhibitor activity (GO:0004857);; Cellular Component: nucleus (GO:0005634);; Biological Process: nucleosome assembly (GO:0006334);; Cellular Component: CAF-1 complex (GO:0033186);; Molecular Function: histone binding (GO:0042393);; Biological Process: negative regulation of catalytic activity (GO:0043086);;	K10751|0|mtr:MTR_8g093540|K10751 chromatin assembly factor 1 subunit B | (RefSeq) chromatin assembly factor 1 subunit FAS2-like protein	[BL]	--	WD domain, G-beta repeat;; Anaphase-promoting complex subunit 4 WD40 domain	Chromatin assembly factor 1 subunit FAS2 OS=Arabidopsis thaliana OX=3702 GN=FAS2 PE=1 SV=1	S	Function unknown	chromatin assembly factor 1 subunit FAS2-like protein [Medicago truncatula]	biological process: biological regulation (GO:0065007);; molecular function: molecular function regulator (GO:0098772);; cellular component: cell (GO:0005623);; cellular component: organelle (GO:0043226);; cellular component: cell part (GO:0044464);; biological process: cellular process (GO:0009987);; biological process: cellular component organization or biogenesis (GO:0071840);; cellular compon…	--
Medtr5g014720.JCVIMt4.0v1	c50011.graph_c0	155.33	2.89	55.33	1.05	1.27e-10	up	1.42435	[K]	Transcription	Molecular Function: protein serine/threonine kinase activity (GO:0004674);; Molecular Function: ATP binding (GO:0005524);; Biological Process: protein phosphorylation (GO:0006468);; Biological Process: lateral root morphogenesis (GO:0010102);; Biological Process: regulation of gene expression (GO:0010468);; Cellular Component: integral component of membrane (GO:0016021);;	--	--	--	Leucine rich repeat;; Leucine Rich repeats (2 copies);; Protein kinase domain;; Protein tyrosine kinase;; Leucine Rich Repeat;; Leucine rich repeat N-terminal domain	LRR receptor-like serine/threonine-protein kinase HSL2 OS=Arabidopsis thaliana OX=3702 GN=HSL2 PE=2 SV=1	S	Function unknown	LRR receptor-like kinase family protein [Medicago truncatula]	biological process: metabolic process (GO:0008152);; biological process: cellular process (GO:0009987);; molecular function: catalytic activity (GO:0003824);; molecular function: binding (GO:0005488);; biological process: multicellular organismal process (GO:0032501);; biological process: developmental process (GO:0032502);; biological process: single-organism process (GO:0044699);; biological pr…	--
Medtr3g032530.JCVIMt4.0v1	c40705.graph_c0	77.67	12.28	26	4.02	7.05e-06	up	1.42363	--	--	Cellular Component: endosome (GO:0005768);; Cellular Component: vacuolar membrane (GO:0005774);; Cellular Component: trans-Golgi network (GO:0005802);; Biological Process: steroid biosynthetic process (GO:0006694);; Molecular Function: S-adenosylmethionine-dependent methyltransferase activity (GO:0008757);; Biological Process: methylation (GO:0032259);;	K00559|6.80946e-46|mtr:MTR_3g032530|K00559 sterol 24-C-methyltransferase [EC:2.1.1.41] | (RefSeq) S-adenosyl-methionine-sterol-C-methyltransferase	[IR]	--	Sterol methyltransferase C-terminal	Cycloartenol-C-24-methyltransferase 1 OS=Oryza sativa subsp. japonica OX=39947 GN=Smt1-1 PE=2 SV=1	S	Function unknown	S-adenosyl-methionine-sterol-C-methyltransferase [Medicago truncatula]	cellular component: cell (GO:0005623);; cellular component: organelle (GO:0043226);; cellular component: cell part (GO:0044464);; cellular component: membrane (GO:0016020);; cellular component: organelle part (GO:0044422);; biological process: metabolic process (GO:0008152);; biological process: single-organism process (GO:0044699);; molecular function: catalytic activity (GO:0003824)	Steroid biosynthesis (ko00100)
Medtr3g061090.JCVIMt4.0v1	c45623.graph_c1	287.67	11.14	104.33	3.97	1.64e-15	up	1.42106	--	--	--	K10523|1.14094e-136|mtr:MTR_3g061090|K10523 speckle-type POZ protein | (RefSeq) BTB/POZ domain plant protein	[DR]	--	BTB/POZ domain	BTB/POZ domain-containing protein At1g55760 OS=Arabidopsis thaliana OX=3702 GN=At1g55760 PE=2 SV=1	S	Function unknown	BTB/POZ domain plant protein [Medicago truncatula]	--	--
Medtr6g022320.JCVIMt4.0v1	c41636.graph_c0	35.67	1.98	10.67	0.46	0.000723235	up	1.41779	--	--	Molecular Function: magnesium ion binding (GO:0000287);; Molecular Function: phospholipid-translocating ATPase activity (GO:0004012);; Molecular Function: ATP binding (GO:0005524);; Cellular Component: plasma membrane (GO:0005886);; Cellular Component: integral component of membrane (GO:0016021);; Biological Process: phospholipid translocation (GO:0045332);;	K20781|1.19476e-46|mtr:MTR_6g022320|K20781 peptidyl serine alpha-galactosyltransferase [EC:2.4.1.-] | (RefSeq) peptidyl serine alpha-galactosyltransferase	--	--	--	--	P	Inorganic ion transport and metabolism	hypothetical protein TSUD_391660 [Trifolium subterraneum]	molecular function: binding (GO:0005488);; biological process: cellular process (GO:0009987);; biological process: single-organism process (GO:0044699);; biological process: localization (GO:0051179);; biological process: biological regulation (GO:0065007);; biological process: cellular component organization or biogenesis (GO:0071840);; molecular function: catalytic activity (GO:0003824);; molec…	--
Medtr4g025530.JCVIMt4.0v1	c33770.graph_c0	29.67	3.04	8.33	0.85	0.00107545	up	1.41717	--	--	--	--	--	--	--	--	--	--	--	--	--
Medtr2g022680.JCVIMt4.0v1	c33935.graph_c0	500	17.8	186	6.47	9.22e-26	up	1.4163	--	--	Biological Process: protein polyubiquitination (GO:0000209);; Molecular Function: zinc ion binding (GO:0008270);; Biological Process: megagametogenesis (GO:0009561);; Cellular Component: membrane (GO:0016020);; Molecular Function: ligase activity (GO:0016874);; Biological Process: protein ubiquitination involved in ubiquitin-dependent protein catabolic process (GO:0042787);; Biological Process: p…	K19043|0|mtr:MTR_2g022680|K19043 E3 ubiquitin-protein ligase RHF [EC:2.3.2.27] | (RefSeq) E3 ubiquitin-protein ligase RHF2A, putative	[O]	Posttranslational modification, protein turnover, chaperones	Ring finger domain;; RING-H2 zinc finger domain;; Zinc finger, C3HC4 type (RING finger);; Zinc finger, C3HC4 type (RING finger)	E3 ubiquitin-protein ligase RHF2A OS=Arabidopsis thaliana OX=3702 GN=RHF2A PE=2 SV=1	O	Posttranslational modification, protein turnover, chaperones	E3 ubiquitin-protein ligase RHF2A, putative [Medicago truncatula]	biological process: metabolic process (GO:0008152);; biological process: cellular process (GO:0009987);; molecular function: binding (GO:0005488);; biological process: multicellular organismal process (GO:0032501);; biological process: developmental process (GO:0032502);; biological process: single-organism process (GO:0044699);; cellular component: membrane (GO:0016020);; molecular function: cat…	--
Medtr6g057750.JCVIMt4.0v1	c51283.graph_c2	123	4.4	40.67	1.47	1.55e-06	up	1.41587	--	--	Molecular Function: protein serine/threonine kinase activity (GO:0004674);; Molecular Function: non-membrane spanning protein tyrosine kinase activity (GO:0004715);; Molecular Function: ATP binding (GO:0005524);; Cellular Component: plasma membrane (GO:0005886);; Biological Process: defense response (GO:0006952);; Cellular Component: plasmodesma (GO:0009506);; Cellular Component: integral compone…	K04733|0|mtr:MTR_6g057750|K04733 interleukin-1 receptor-associated kinase 4 [EC:2.7.11.1] | (RefSeq) cysteine-rich receptor-kinase-like protein	--	--	Salt stress response/antifungal;; Salt stress response/antifungal	Putative cysteine-rich receptor-like protein kinase 9 OS=Arabidopsis thaliana OX=3702 GN=CRK9 PE=5 SV=1	T	Signal transduction mechanisms	cysteine-rich receptor-kinase-like protein [Medicago truncatula]	biological process: metabolic process (GO:0008152);; biological process: cellular process (GO:0009987);; molecular function: catalytic activity (GO:0003824);; molecular function: binding (GO:0005488);; cellular component: cell (GO:0005623);; cellular component: membrane (GO:0016020);; cellular component: cell part (GO:0044464);; biological process: response to stimulus (GO:0050896);; cellular com…	--
Medtr6g034975.JCVIMt4.0v1	c43478.graph_c0	96	5.14	32.33	1.75	1.4e-06	up	1.41573	[P]	Inorganic ion transport and metabolism	Molecular Function: iron ion transmembrane transporter activity (GO:0005381);; Molecular Function: manganese ion transmembrane transporter activity (GO:0005384);; Cellular Component: cell (GO:0005623);; Biological Process: intracellular sequestering of iron ion (GO:0006880);; Cellular Component: integral component of membrane (GO:0016021);; Biological Process: cellular manganese ion homeostasis (…	--	[S]	Function unknown	VIT family	Vacuolar iron transporter homolog 4 OS=Arabidopsis thaliana OX=3702 GN=At3g43660 PE=2 SV=1	S	Function unknown	vacuolar iron transporter-like protein [Medicago truncatula]	biological process: localization (GO:0051179);; molecular function: transporter activity (GO:0005215);; cellular component: cell (GO:0005623);; biological process: cellular process (GO:0009987);; biological process: single-organism process (GO:0044699);; biological process: biological regulation (GO:0065007);; cellular component: membrane (GO:0016020);; cellular component: membrane part (GO:00444…	--
Medtr6g025320.JCVIMt4.0v1	c48765.graph_c0	2179.67	43.81	794.33	15.93	3.28e-25	up	1.41507	--	--	--	--	[T]	Signal transduction mechanisms	--	Calmodulin OS=Capsicum annuum OX=4072 GN=CCM1 PE=2 SV=3	DTZ	--	hypothetical protein GLYMA_13G074800 [Glycine max]	--	--
Medtr2g072530.JCVIMt4.0v1	c50856.graph_c0	251.33	9.85	92.67	3.76	3.75e-11	up	1.41343	--	--	--	--	--	--	FBD	F-box/FBD/LRR-repeat protein At3g14710 OS=Arabidopsis thaliana OX=3702 GN=At3g14710 PE=2 SV=1	S	Function unknown	F-box/RNI/FBD-like domain protein [Medicago truncatula]	--	--
--	c50875.graph_c0	41	1.83	12.33	0.56	0.000311958	up	1.41328	--	--	--	--	--	--	--	--	--	--	--	--	--
Medtr5g048050.JCVIMt4.0v1	c46930.graph_c1	150.67	5.4	49	1.81	5.54e-06	up	1.41172	[T]	Signal transduction mechanisms	Molecular Function: ubiquitin-protein transferase activity (GO:0004842);; Biological Process: protein ubiquitination (GO:0016567);; Molecular Function: ligase activity (GO:0016874);;	--	--	--	U-box domain	U-box domain-containing protein 21 OS=Arabidopsis thaliana OX=3702 GN=PUB21 PE=2 SV=1	O	Posttranslational modification, protein turnover, chaperones	Avr9/Cf-9 rapidly elicited protein [Medicago truncatula]	biological process: metabolic process (GO:0008152);; biological process: cellular process (GO:0009987);; molecular function: catalytic activity (GO:0003824)	--
Medtr4g010140.JCVIMt4.0v1	c48369.graph_c0	4427.67	116.92	1681.33	43.99	4.3e-57	up	1.41159	--	--	Cellular Component: chloroplast stroma (GO:0009570);; Cellular Component: thylakoid (GO:0009579);; Biological Process: chlororespiration (GO:0010478);;	--	--	--	--	--	S	Function unknown	post-illumination chlorophyll fluorescence increase [Medicago truncatula]	cellular component: cell (GO:0005623);; cellular component: organelle (GO:0043226);; cellular component: organelle part (GO:0044422);; cellular component: cell part (GO:0044464);; biological process: metabolic process (GO:0008152);; biological process: cellular process (GO:0009987);; biological process: single-organism process (GO:0044699)	--
--	c49327.graph_c0	112.67	88.09	39.33	31.79	1.72e-07	up	1.41125	--	--	--	--	--	--	--	--	--	--	--	--	--
Medtr1g082540.JCVIMt4.0v1	c50675.graph_c0	39	1.33	11.67	0.45	0.000380407	up	1.41069	--	--	--	--	--	--	--	--	--	--	--	--	--
Medtr8g020950.JCVIMt4.0v1	c48733.graph_c0	930.67	33.07	342.33	11.96	3.61e-17	up	1.41046	[QV]	Secondary metabolites biosynthesis, transport and catabolism ;; Defense mechanisms	Molecular Function: iron ion binding (GO:0005506);; Cellular Component: integral component of membrane (GO:0016021);; Molecular Function: oxidoreductase activity, acting on paired donors, with incorporation or reduction of molecular oxygen, NAD(P)H as one donor, and incorporation of one atom of oxygen (GO:0016709);; Molecular Function: heme binding (GO:0020037);; Biological Process: secondary met…	--	[Q]	Secondary metabolites biosynthesis, transport and catabolism	Cytochrome P450;; Cytochrome P450;; Cytochrome P450	Cytochrome P450 76C4 OS=Arabidopsis thaliana OX=3702 GN=CYP76C4 PE=3 SV=1	Q	Secondary metabolites biosynthesis, transport and catabolism	hypothetical protein TSUD_358480 [Trifolium subterraneum]	molecular function: binding (GO:0005488);; cellular component: membrane (GO:0016020);; cellular component: membrane part (GO:0044425);; biological process: metabolic process (GO:0008152);; biological process: single-organism process (GO:0044699);; molecular function: catalytic activity (GO:0003824)	--
Medtr1g097690.JCVIMt4.0v1	c40819.graph_c0	419	12	154.33	4.26	1.34e-21	up	1.41016	--	--	Molecular Function: phosphatidylinositol-4,5-bisphosphate 5-phosphatase activity (GO:0004439);; Biological Process: phosphatidylinositol dephosphorylation (GO:0046856);;	K20279|0|mtr:MTR_1g097690|K20279 synaptojanin [EC:3.1.3.36] | (RefSeq) type I inositol-1,4,5-trisphosphate 5-phosphatase	[U]	Intracellular trafficking, secretion, and vesicular transport	Endonuclease/Exonuclease/phosphatase family	Type IV inositol polyphosphate 5-phosphatase 3 OS=Arabidopsis thaliana OX=3702 GN=IP5P3 PE=1 SV=1	T	Signal transduction mechanisms	type I inositol-1,4,5-trisphosphate 5-phosphatase [Medicago truncatula]	biological process: metabolic process (GO:0008152);; biological process: cellular process (GO:0009987);; molecular function: catalytic activity (GO:0003824);; biological process: single-organism process (GO:0044699)	Inositol phosphate metabolism (ko00562);; Phosphatidylinositol signaling system (ko04070)
Medtr5g070330.JCVIMt4.0v1	c48762.graph_c1	453	27.72	170	10.06	3.08e-15	up	1.41014	[P]	Inorganic ion transport and metabolism	Molecular Function: calcium:proton antiporter activity (GO:0015369);; Cellular Component: integral component of membrane (GO:0016021);; Biological Process: calcium ion transmembrane transport (GO:0070588);;	K07300|0|mtr:MTR_5g070330|K07300 Ca2+:H+ antiporter | (RefSeq) vacuolar cation/proton exchanger 3	[P]	Inorganic ion transport and metabolism	Sodium/calcium exchanger protein	Vacuolar cation/proton exchanger 3 OS=Arabidopsis thaliana OX=3702 GN=CAX3 PE=1 SV=1	P	Inorganic ion transport and metabolism	vacuolar cation/proton exchanger 3 [Medicago truncatula]	biological process: single-organism process (GO:0044699);; biological process: localization (GO:0051179);; molecular function: transporter activity (GO:0005215);; cellular component: membrane (GO:0016020);; cellular component: membrane part (GO:0044425)	--
Medtr1g054205.JCVIMt4.0v1	c38972.graph_c1	286	32.97	103.33	12.03	7.8e-14	up	1.40851	--	--	Molecular Function: peroxidase activity (GO:0004601);; Cellular Component: extracellular region (GO:0005576);; Biological Process: response to oxidative stress (GO:0006979);; Molecular Function: heme binding (GO:0020037);; Biological Process: hydrogen peroxide catabolic process (GO:0042744);; Molecular Function: metal ion binding (GO:0046872);; Biological Process: oxidation-reduction process (GO:…	K00430|1.34195e-110|mtr:MTR_1g054205|K00430 peroxidase [EC:1.11.1.7] | (RefSeq) peroxidase family protein	--	--	Peroxidase	Peroxidase 53 OS=Arabidopsis thaliana OX=3702 GN=PER53 PE=1 SV=1	G	Carbohydrate transport and metabolism	peroxidase family protein [Medicago truncatula]	biological process: metabolic process (GO:0008152);; biological process: cellular process (GO:0009987);; biological process: single-organism process (GO:0044699);; biological process: response to stimulus (GO:0050896);; biological process: detoxification (GO:0098754);; molecular function: catalytic activity (GO:0003824);; molecular function: antioxidant activity (GO:0016209);; cellular component:…	Phenylpropanoid biosynthesis (ko00940)
Medtr2g010940.JCVIMt4.0v1	c51992.graph_c1	1076.67	29.85	390	12.87	9.38e-21	up	1.40762	--	--	--	--	--	--	--	--	--	--	hypothetical protein MTR_8g061120 [Medicago truncatula]	--	--
Medtr4g073220.JCVIMt4.0v1	c48439.graph_c0	46	1.05	13	0.32	0.00062231	up	1.40699	--	;;	Molecular Function: protein serine/threonine kinase activity (GO:0004674);; Molecular Function: ATP binding (GO:0005524);; Biological Process: protein phosphorylation (GO:0006468);; Cellular Component: integral component of membrane (GO:0016021);;	K04730|0|mtr:MTR_4g073220|K04730 interleukin-1 receptor-associated kinase 1 [EC:2.7.11.1] | (RefSeq) receptor-like kinase	--	--	Protein kinase domain;; Protein tyrosine kinase	Rust resistance kinase Lr10 OS=Triticum aestivum OX=4565 GN=LRK10 PE=2 SV=1	T	Signal transduction mechanisms	receptor-like kinase [Medicago truncatula]	biological process: metabolic process (GO:0008152);; biological process: cellular process (GO:0009987);; molecular function: catalytic activity (GO:0003824);; molecular function: binding (GO:0005488);; cellular component: membrane (GO:0016020);; cellular component: membrane part (GO:0044425)	--
Medtr6g007770.JCVIMt4.0v1	c43509.graph_c0	2091	117.05	721.33	61.28	1.94e-07	up	1.40695	[Q]	Secondary metabolites biosynthesis, transport and catabolism	Molecular Function: peroxidase activity (GO:0004601);; Biological Process: response to oxidative stress (GO:0006979);; Molecular Function: heme binding (GO:0020037);; Molecular Function: dioxygenase activity (GO:0051213);; Biological Process: oxidation-reduction process (GO:0055114);; Biological Process: cellular oxidant detoxification (GO:0098869);;	K10529|0|mtr:MTR_6g007770|K10529 alpha-dioxygenase [EC:1.-.-.-] | (RefSeq) pathogen-inducible alpha-dioxygenase	[R]	General function prediction only	Animal haem peroxidase	Alpha-dioxygenase 1 OS=Arabidopsis thaliana OX=3702 GN=DOX1 PE=1 SV=1	S	Function unknown	pathogen-inducible alpha-dioxygenase [Medicago truncatula]	biological process: metabolic process (GO:0008152);; biological process: cellular process (GO:0009987);; biological process: single-organism process (GO:0044699);; biological process: response to stimulus (GO:0050896);; biological process: detoxification (GO:0098754);; molecular function: catalytic activity (GO:0003824);; molecular function: antioxidant activity (GO:0016209);; molecular function:…	alpha-Linolenic acid metabolism (ko00592)
Medtr5g074450.JCVIMt4.0v1	c47311.graph_c0	40.33	2.59	12	0.81	0.000413699	up	1.40636	--	--	--	K07195|5.20411e-97|mtr:MTR_5g073460|K07195 exocyst complex component 7 | (RefSeq) exocyst subunit exo70 family protein	[U]	Intracellular trafficking, secretion, and vesicular transport	--	Exocyst complex component EXO70B1 OS=Arabidopsis thaliana OX=3702 GN=EXO70B1 PE=1 SV=1	S	Function unknown	exocyst complex component [Trifolium pratense]	--	--
Medtr1g073700.JCVIMt4.0v1	c44297.graph_c0	252.67	16.14	92.67	6.75	2.43e-14	up	1.40602	[S]	Function unknown	Molecular Function: oxidoreductase activity (GO:0016491);; Biological Process: oxidation-reduction process (GO:0055114);;	K00574|7.20018e-149|mtr:MTR_1g073700|K00574 cyclopropane-fatty-acyl-phospholipid synthase [EC:2.1.1.79] | (RefSeq) cyclopropane-fatty-acyl-phospholipid synthase	--	--	Mycolic acid cyclopropane synthetase	--	M	Cell wall/membrane/envelope biogenesis	cyclopropane-fatty-acyl-phospholipid synthase [Medicago truncatula]	biological process: metabolic process (GO:0008152);; biological process: single-organism process (GO:0044699);; molecular function: catalytic activity (GO:0003824)	--
--	c28238.graph_c0	23.33	1.67	6	0.51	0.00262136	up	1.4047	--	--	--	--	--	--	--	--	--	--	hypothetical protein TSUD_114120 [Trifolium subterraneum]	--	--
--	c33763.graph_c0	57.67	8.68	18	2.83	0.000112106	up	1.40402	--	--	--	--	--	--	--	--	--	--	hypothetical protein VIGAN_08277100 [Vigna angularis var. angularis]	--	--
Medtr1g105480.JCVIMt4.0v1	c52303.graph_c0	84886.3	2754.46	32332.3	1033.22	1.69e-92	up	1.40359	[H]	Coenzyme transport and metabolism	Cellular Component: cytosol (GO:0005829);; Biological Process: response to stress (GO:0006950);; Biological Process: thiamine biosynthetic process (GO:0009228);; Cellular Component: chloroplast stroma (GO:0009570);; Molecular Function: oxidoreductase activity (GO:0016491);; Biological Process: thiazole biosynthetic process (GO:0052837);; Biological Process: oxidation-reduction process (GO:0055114…	K03146|0|mtr:MTR_1g105480|K03146 thiamine thiazole synthase | (RefSeq) thiazole biosynthetic enzyme	[R]	General function prediction only	Thi4 family;; FAD dependent oxidoreductase;; FAD binding domain;; NAD(P)-binding Rossmann-like domain;; Pyridine nucleotide-disulphide oxidoreductase;; GMC oxidoreductase	Thiamine thiazole synthase 2, chloroplastic OS=Vitis vinifera OX=29760 GN=THI1-2 PE=3 SV=1	H	Coenzyme transport and metabolism	thiazole biosynthetic enzyme [Medicago truncatula]	cellular component: cell (GO:0005623);; cellular component: cell part (GO:0044464);; biological process: response to stimulus (GO:0050896);; biological process: metabolic process (GO:0008152);; biological process: cellular process (GO:0009987);; biological process: single-organism process (GO:0044699);; cellular component: organelle (GO:0043226);; cellular component: organelle part (GO:0044422);;…	Thiamine metabolism (ko00730)
--	c52909.graph_c0	77.33	2.54	25.33	0.79	1.91e-05	up	1.40257	--	--	--	--	--	--	--	--	--	--	--	--	--
Medtr4g075150.JCVIMt4.0v1	c47524.graph_c0	329.67	12.3	112	4.24	1.67e-08	up	1.40204	[E]	Amino acid transport and metabolism	Molecular Function: serine-type carboxypeptidase activity (GO:0004185);; Cellular Component: vacuole (GO:0005773);; Biological Process: proteolysis involved in cellular protein catabolic process (GO:0051603);;	K16297|0|mtr:MTR_4g075150|K16297 serine carboxypeptidase-like clade II [EC:3.4.16.-] | (RefSeq) serine carboxypeptidase-like protein	[OE]	--	Serine carboxypeptidase	Serine carboxypeptidase-like 34 OS=Arabidopsis thaliana OX=3702 GN=SCPL34 PE=2 SV=2	E	Amino acid transport and metabolism	serine carboxypeptidase-like protein [Medicago truncatula]	biological process: metabolic process (GO:0008152);; molecular function: catalytic activity (GO:0003824);; cellular component: cell (GO:0005623);; cellular component: organelle (GO:0043226);; cellular component: cell part (GO:0044464);; biological process: cellular process (GO:0009987)	--
--	c50978.graph_c0	238.67	8.93	88.33	3.57	1.66e-14	up	1.40131	--	--	--	--	[R]	General function prediction only	--	Putative ribonuclease H protein At1g65750 OS=Arabidopsis thaliana OX=3702 GN=At1g65750 PE=3 SV=1	S	Function unknown	ribonuclease H [Trifolium pratense]	--	--
Medtr1g079340.JCVIMt4.0v1	c52332.graph_c0	7793.67	171.59	2966	71.25	4.22e-73	up	1.40082	--	--	Cellular Component: membrane (GO:0016020);;	--	--	--	F-box domain;; F-box-like	Outer envelope pore protein 16, chloroplastic OS=Pisum sativum OX=3888 GN=OEP16 PE=1 SV=1	S	Function unknown	phloem protein 2-B1 [Medicago truncatula]	cellular component: membrane (GO:0016020)	--
Medtr4g083960.JCVIMt4.0v1	c48007.graph_c0	277.33	7.42	71	2	0.001992	up	1.39914	[GEPR]	Carbohydrate transport and metabolism ;; Amino acid transport and metabolism ;; Inorganic ion transport and metabolism ;; General function prediction only	Cellular Component: integral component of plasma membrane (GO:0005887);; Molecular Function: substrate-specific transmembrane transporter activity (GO:0022891);; Biological Process: transmembrane transport (GO:0055085);;	K08176|0|mtr:MTR_4g083960|K08176 MFS transporter, PHS family, inorganic phosphate transporter | (RefSeq) phosphate transporter	[P]	Inorganic ion transport and metabolism	Sugar (and other) transporter;; Major Facilitator Superfamily	Probable inorganic phosphate transporter 1-9 OS=Arabidopsis thaliana OX=3702 GN=PHT1-9 PE=2 SV=1	G	Carbohydrate transport and metabolism	phosphate transporter [Medicago truncatula]	cellular component: cell (GO:0005623);; cellular component: membrane (GO:0016020);; cellular component: membrane part (GO:0044425);; cellular component: cell part (GO:0044464);; biological process: localization (GO:0051179);; molecular function: transporter activity (GO:0005215)	--
Medtr4g078710.JCVIMt4.0v1	c52514.graph_c0	1365.33	62	502.67	22.88	5.62e-22	up	1.39866	--	--	Molecular Function: DNA binding (GO:0003677);; Molecular Function: transcription factor activity, sequence-specific DNA binding (GO:0003700);; Cellular Component: nucleus (GO:0005634);; Biological Process: regulation of transcription, DNA-templated (GO:0006355);;	K09286|2.75642e-85|mtr:MTR_4g078710|K09286 EREBP-like factor | (RefSeq) ethylene response factor	--	--	AP2 domain	Ethylene-responsive transcription factor 9 OS=Arabidopsis thaliana OX=3702 GN=ERF9 PE=2 SV=1	K	Transcription	ethylene response factor [Medicago truncatula]	molecular function: binding (GO:0005488);; biological process: biological regulation (GO:0065007);; molecular function: nucleic acid binding transcription factor activity (GO:0001071);; cellular component: cell (GO:0005623);; cellular component: organelle (GO:0043226);; cellular component: cell part (GO:0044464)	--
--	c50597.graph_c3	237	19.36	83	6.92	5.61e-09	up	1.39672	--	--	--	--	--	--	--	--	--	--	--	--	--
Medtr1g111210.JCVIMt4.0v1	c43261.graph_c0	186	7.24	42.67	1.78	0.00400105	up	1.39624	--	--	Biological Process: response to oxidative stress (GO:0006979);; Biological Process: protein transport (GO:0015031);;	K19476|6.91067e-130|mtr:MTR_1g111210|K19476 vacuolar protein sorting-associated protein IST1 | (RefSeq) regulator of Vps4 activity in the MVB pathway protein	[Z]	Cytoskeleton	Regulator of Vps4 activity in the MVB pathway	--	S	Function unknown	regulator of Vps4 activity in the MVB pathway protein [Medicago truncatula]	biological process: response to stimulus (GO:0050896);; biological process: localization (GO:0051179)	Endocytosis (ko04144)
Medtr4g006940.JCVIMt4.0v1	c43237.graph_c0	285.67	7.52	105.33	2.93	1.15e-14	up	1.39522	[M]	Cell wall/membrane/envelope biogenesis	Molecular Function: cinnamoyl-CoA reductase activity (GO:0016621);; Molecular Function: dihydrokaempferol 4-reductase activity (GO:0045552);; Molecular Function: coenzyme binding (GO:0050662);; Biological Process: oxidation-reduction process (GO:0055114);;	K09753|0|mtr:MTR_4g006940|K09753 cinnamoyl-CoA reductase [EC:1.2.1.44] | (RefSeq) cinnamoyl-CoA reductase-like protein	[V]	Defense mechanisms	NAD dependent epimerase/dehydratase family;; 3-beta hydroxysteroid dehydrogenase/isomerase family;; NAD(P)H-binding;; GDP-mannose 4,6 dehydratase;; Male sterility protein;; NmrA-like family;; Polysaccharide biosynthesis protein;; KR domain	Cinnamoyl-CoA reductase 2 OS=Arabidopsis thaliana OX=3702 GN=CCR2 PE=1 SV=1	M	Cell wall/membrane/envelope biogenesis	cinnamoyl-CoA reductase-like protein [Medicago truncatula]	biological process: metabolic process (GO:0008152);; biological process: single-organism process (GO:0044699);; molecular function: catalytic activity (GO:0003824);; molecular function: binding (GO:0005488)	Phenylpropanoid biosynthesis (ko00940)
Medtr4g082883.JCVIMt4.0v1	c24500.graph_c0	1723.33	450.51	657.67	169.74	9.74e-25	up	1.39386	--	--	--	--	--	--	--	--	--	--	hypothetical protein MTR_4g082883 [Medicago truncatula]	--	--
Medtr1g044785.JCVIMt4.0v1	c49786.graph_c0	72	3.74	24.67	1.35	4.33e-06	up	1.39344	--	--	Cellular Component: membrane (GO:0016020);; Molecular Function: hydrolase activity (GO:0016787);; Biological Process: RNA phosphodiester bond hydrolysis (GO:0090501);;	--	--	--	CCT motif	--	S	Function unknown	hypothetical protein TSUD_18090 [Trifolium subterraneum]	cellular component: membrane (GO:0016020);; molecular function: catalytic activity (GO:0003824);; biological process: metabolic process (GO:0008152);; biological process: cellular process (GO:0009987)	--
Medtr6g053940.JCVIMt4.0v1	c50447.graph_c1	35	1.13	10	0.28	0.0010171	up	1.39302	[X]	Mobilome: prophages, transposons	Molecular Function: binding (GO:0005488);;	--	[R]	General function prediction only	Integrase core domain;; gag-polypeptide of LTR copia-type;; GAG-pre-integrase domain;; Zinc knuckle	Retrovirus-related Pol polyprotein from transposon TNT 1-94 OS=Nicotiana tabacum OX=4097 PE=2 SV=1	L	Replication, recombination and repair	uncharacterized protein LOC110699091 [Chenopodium quinoa]	molecular function: binding (GO:0005488)	--
Medtr2g031490.JCVIMt4.0v1	c50559.graph_c0	2681.67	79.96	985.67	29.33	4.21e-24	up	1.39288	[C]	Energy production and conversion	Molecular Function: oxidoreductase activity, acting on CH-OH group of donors (GO:0016614);; Molecular Function: flavin adenine dinucleotide binding (GO:0050660);; Biological Process: oxidation-reduction process (GO:0055114);;	--	--	--	FAD binding domain;; Berberine and berberine like	Berberine bridge enzyme-like 21 OS=Arabidopsis thaliana OX=3702 GN=At4g20840 PE=2 SV=1	C	Energy production and conversion	FAD-binding berberine family protein [Medicago truncatula]	biological process: metabolic process (GO:0008152);; biological process: single-organism process (GO:0044699);; molecular function: catalytic activity (GO:0003824);; molecular function: binding (GO:0005488)	--
Medtr3g466830.JCVIMt4.0v1	c53772.graph_c0	153.67	17.36	56.33	6.21	8.52e-10	up	1.39148	--	--	Molecular Function: DNA binding (GO:0003677);; Cellular Component: nucleus (GO:0005634);; Biological Process: regulation of transcription, DNA-templated (GO:0006355);; Molecular Function: protein dimerization activity (GO:0046983);;	--	[K]	Transcription	SRF-type transcription factor (DNA-binding and dimerisation domain)	Agamous-like MADS-box protein AGL80 OS=Arabidopsis thaliana OX=3702 GN=AGL80 PE=1 SV=1	K	Transcription	MADS-box transcription factor family protein [Medicago truncatula]	molecular function: binding (GO:0005488);; cellular component: cell (GO:0005623);; cellular component: organelle (GO:0043226);; cellular component: cell part (GO:0044464);; biological process: biological regulation (GO:0065007)	--
--	c41503.graph_c0	36.33	0.61	10.67	0.18	0.000797254	up	1.3902	--	--	Biological Process: carbohydrate transport (GO:0008643);; Cellular Component: integral component of membrane (GO:0016021);;	--	--	--	--	--	--	--	nucleotide/sugar transporter family protein [Medicago truncatula]	biological process: single-organism process (GO:0044699);; biological process: localization (GO:0051179);; cellular component: membrane (GO:0016020);; cellular component: membrane part (GO:0044425)	--
Medtr3g085830.JCVIMt4.0v1	c38078.graph_c0	36	0.89	11	0.27	0.000521587	up	1.39017	[T]	Signal transduction mechanisms	Molecular Function: kinase activity (GO:0016301);; Biological Process: phosphorylation (GO:0016310);;	--	[R]	General function prediction only	Ankyrin repeats (3 copies);; Ankyrin repeats (many copies);; Ankyrin repeats (many copies);; Ankyrin repeat;; Ankyrin repeat	Ankyrin repeat-containing protein ITN1 OS=Arabidopsis thaliana OX=3702 GN=ITN1 PE=1 SV=1	S	Function unknown	ankyrin repeat protein [Medicago truncatula]	biological process: metabolic process (GO:0008152);; biological process: cellular process (GO:0009987);; molecular function: catalytic activity (GO:0003824)	--
Medtr2g010200.JCVIMt4.0v1	c8666.graph_c0	528.67	38.28	202	14.23	1.37e-17	up	1.38658	--	--	--	--	--	--	--	--	S	Function unknown	hypothetical protein MTR_2g010200 [Medicago truncatula]	--	--
Medtr6g463700.JCVIMt4.0v1	c51283.graph_c3	54	4.22	17	1.35	0.000171342	up	1.38514	--	--	Molecular Function: protein serine/threonine kinase activity (GO:0004674);; Molecular Function: ATP binding (GO:0005524);; Cellular Component: plasma membrane (GO:0005886);; Biological Process: protein phosphorylation (GO:0006468);; Biological Process: defense response (GO:0006952);; Cellular Component: plasmodesma (GO:0009506);; Cellular Component: integral component of membrane (GO:0016021);;	K04733|4.95583e-94|mtr:MTR_6g463700|K04733 interleukin-1 receptor-associated kinase 4 [EC:2.7.11.1] | (RefSeq) cysteine-rich receptor-kinase-like protein	--	--	Protein tyrosine kinase	Cysteine-rich receptor-like protein kinase 10 OS=Arabidopsis thaliana OX=3702 GN=CRK10 PE=1 SV=3	--	--	cysteine-rich receptor-kinase-like protein [Medicago truncatula]	biological process: metabolic process (GO:0008152);; biological process: cellular process (GO:0009987);; molecular function: catalytic activity (GO:0003824);; molecular function: binding (GO:0005488);; cellular component: cell (GO:0005623);; cellular component: membrane (GO:0016020);; cellular component: cell part (GO:0044464);; biological process: response to stimulus (GO:0050896);; cellular com…	--
Medtr8g019710.JCVIMt4.0v1	c34613.graph_c0	48.33	2.06	15.67	0.59	0.000219097	up	1.38403	--	--	Molecular Function: zinc ion binding (GO:0008270);; Cellular Component: integral component of membrane (GO:0016021);;	--	[O]	Posttranslational modification, protein turnover, chaperones	Ring finger domain;; Zinc finger, C3HC4 type (RING finger);; RING-H2 zinc finger domain;; RING-like zinc finger;; Zinc finger, C3HC4 type (RING finger);; Prokaryotic RING finger family 4;; RING-type zinc-finger	RING-H2 finger protein ATL52 OS=Arabidopsis thaliana OX=3702 GN=ATL52 PE=2 SV=1	O	Posttranslational modification, protein turnover, chaperones	zinc finger, C3HC4 type (RING finger) protein [Medicago truncatula]	molecular function: binding (GO:0005488);; cellular component: membrane (GO:0016020);; cellular component: membrane part (GO:0044425)	--
Medtr7g029030.JCVIMt4.0v1	c52575.graph_c0	1870	114.74	709.33	45.28	2.61e-34	up	1.38293	--	--	Molecular Function: peroxidase activity (GO:0004601);; Cellular Component: extracellular region (GO:0005576);; Biological Process: response to oxidative stress (GO:0006979);; Molecular Function: heme binding (GO:0020037);; Biological Process: hydrogen peroxide catabolic process (GO:0042744);; Molecular Function: metal ion binding (GO:0046872);; Biological Process: oxidation-reduction process (GO:…	K00430|0|mtr:MTR_7g029030|K00430 peroxidase [EC:1.11.1.7] | (RefSeq) peroxidase family protein	--	--	Peroxidase	Peroxidase 55 OS=Arabidopsis thaliana OX=3702 GN=PER55 PE=1 SV=1	G	Carbohydrate transport and metabolism	peroxidase family protein [Medicago truncatula]	biological process: metabolic process (GO:0008152);; biological process: cellular process (GO:0009987);; biological process: single-organism process (GO:0044699);; biological process: response to stimulus (GO:0050896);; biological process: detoxification (GO:0098754);; molecular function: catalytic activity (GO:0003824);; molecular function: antioxidant activity (GO:0016209);; cellular component:…	Phenylpropanoid biosynthesis (ko00940)
Medtr4g108880.JCVIMt4.0v1	c48474.graph_c0	1178.33	34.57	451	18.23	5.41e-41	up	1.3822	[TK]	Signal transduction mechanisms ;; Transcription	Biological Process: phosphorelay signal transduction system (GO:0000160);; Cellular Component: intracellular (GO:0005622);;	K12127|0|mtr:MTR_4g108880|K12127 pseudo-response regulator 1 | (RefSeq) two-component response regulator-like APRR7 protein	[K]	Transcription	Response regulator receiver domain;; CCT motif	Two-component response regulator-like APRR1 OS=Arabidopsis thaliana OX=3702 GN=APRR1 PE=1 SV=1	K	Transcription	two-component response regulator-like APRR7 protein [Medicago truncatula]	biological process: cellular process (GO:0009987);; biological process: signaling (GO:0023052);; biological process: single-organism process (GO:0044699);; biological process: response to stimulus (GO:0050896);; biological process: biological regulation (GO:0065007);; cellular component: cell (GO:0005623);; cellular component: cell part (GO:0044464)	Circadian rhythm - plant (ko04712)
Medtr7g106340.JCVIMt4.0v1	c43635.graph_c0	507.67	15.11	182.67	5.6	4.09e-11	up	1.38143	--	--	Molecular Function: ubiquitin-protein transferase activity (GO:0004842);; Biological Process: protein ubiquitination (GO:0016567);; Molecular Function: ligase activity (GO:0016874);;	--	--	--	--	E3 ubiquitin-protein ligase PUB22 OS=Arabidopsis thaliana OX=3702 GN=PUB22 PE=1 SV=1	O	Posttranslational modification, protein turnover, chaperones	E3 ubiquitin-protein ligase PUB23-like protein [Medicago truncatula]	biological process: metabolic process (GO:0008152);; biological process: cellular process (GO:0009987);; molecular function: catalytic activity (GO:0003824)	--
Medtr2g034440.JCVIMt4.0v1	c46749.graph_c0	3079.33	149.41	1165.67	56.44	3.07e-38	up	1.38101	--	--	Biological Process: carbohydrate metabolic process (GO:0005975);; Molecular Function: glucan endo-1,3-beta-D-glucosidase activity (GO:0042973);;	--	--	--	Glycosyl hydrolases family 17	Glucan endo-1,3-beta-glucosidase OS=Pisum sativum OX=3888 PE=2 SV=1	G	Carbohydrate transport and metabolism	Glycoside hydrolase, family 17 [Medicago truncatula]	biological process: metabolic process (GO:0008152);; molecular function: catalytic activity (GO:0003824)	--
Medtr4g086540.JCVIMt4.0v1	c36557.graph_c0	137.67	6.45	47.33	2.27	1.36e-06	up	1.38017	[I]	Lipid transport and metabolism	Biological Process: metabolic process (GO:0008152);; Molecular Function: hydrolase activity (GO:0016787);;	--	[V]	Defense mechanisms	alpha/beta hydrolase fold;; Carboxylesterase family	Probable carboxylesterase 2 OS=Arabidopsis thaliana OX=3702 GN=CXE2 PE=2 SV=1	I	Lipid transport and metabolism	alpha/beta hydrolase fold protein [Medicago truncatula]	biological process: metabolic process (GO:0008152);; molecular function: catalytic activity (GO:0003824)	--
Medtr4g127360.JCVIMt4.0v1	c53275.graph_c2	31.67	25.12	9.33	8.04	0.00106976	up	1.3795	[Q]	Secondary metabolites biosynthesis, transport and catabolism	Molecular Function: alpha-L-fucosidase activity (GO:0004560);; Molecular Function: phenylpyruvate tautomerase activity (GO:0050178);;	K07253|1.11705e-45|mtr:MTR_4g127360|K07253 phenylpyruvate tautomerase [EC:5.3.2.1] | (RefSeq) macrophage migration inhibition factor-like protein	[V]	Defense mechanisms	Macrophage migration inhibitory factor (MIF)	--	S	Function unknown	macrophage migration inhibition factor-like protein [Medicago truncatula]	molecular function: catalytic activity (GO:0003824)	Tyrosine metabolism (ko00350);; Phenylalanine metabolism (ko00360)
Medtr5g084750.JCVIMt4.0v1	c46765.graph_c0	239.33	11.25	89	4.04	5.48e-10	up	1.3784	[IR]	Lipid transport and metabolism ;; General function prediction only	Molecular Function: hydrolase activity, acting on ester bonds (GO:0016788);; Molecular Function: 9,9'-dicis-carotene:quinone oxidoreductase activity (GO:0052886);; Molecular Function: 7,9,9'-tricis-neurosporene:quinone oxidoreductase activity (GO:0052887);; Biological Process: 9,9'-di-cis-zeta-carotene desaturation to 7,9,7',9'-tetra-cis-lycopene (GO:0052889);; Biological Process: oxidation-reduc…	--	--	--	GDSL-like Lipase/Acylhydrolase	GDSL esterase/lipase At2g42990 OS=Arabidopsis thaliana OX=3702 GN=At2g42990 PE=2 SV=1	S	Function unknown	GDSL-like lipase/acylhydrolase [Medicago truncatula]	molecular function: catalytic activity (GO:0003824);; biological process: metabolic process (GO:0008152);; biological process: single-organism process (GO:0044699);; biological process: cellular process (GO:0009987)	--
Medtr4g050863.JCVIMt4.0v1	c50346.graph_c1	430.67	60.18	162.67	27.43	1.33e-15	up	1.37785	[I]	Lipid transport and metabolism	Molecular Function: acetyl-CoA carboxylase activity (GO:0003989);; Molecular Function: ATP binding (GO:0005524);; Biological Process: fatty acid biosynthetic process (GO:0006633);; Molecular Function: zinc ion binding (GO:0008270);; Cellular Component: acetyl-CoA carboxylase complex (GO:0009317);; Cellular Component: chloroplast stroma (GO:0009570);; Molecular Function: transferase activity (GO:0…	--	[EI]	--	--	Acetyl-coenzyme A carboxylase carboxyl transferase subunit beta, chloroplastic OS=Morus indica OX=248361 GN=accD PE=3 SV=1	I	Lipid transport and metabolism	acetyl-CoA carboxylase beta subunit (chloroplast) [Medicago falcata]	molecular function: catalytic activity (GO:0003824);; molecular function: binding (GO:0005488);; biological process: metabolic process (GO:0008152);; biological process: cellular process (GO:0009987);; biological process: single-organism process (GO:0044699);; cellular component: cell (GO:0005623);; cellular component: macromolecular complex (GO:0032991);; cellular component: cell part (GO:004446…	--
Medtr3g008160.JCVIMt4.0v1	c52406.graph_c0	523	9.68	191.67	3.78	5.68e-14	up	1.37771	[E]	Amino acid transport and metabolism	Molecular Function: sugar:proton symporter activity (GO:0005351);; Molecular Function: glucose transmembrane transporter activity (GO:0005355);; Cellular Component: integral component of plasma membrane (GO:0005887);; Biological Process: proton transport (GO:0015992);; Molecular Function: hydrolase activity (GO:0016787);; Molecular Function: 2-alkenal reductase [NAD(P)] activity (GO:0032440);; Bi…	--	[E]	Amino acid transport and metabolism	Sugar (and other) transporter;; Major Facilitator Superfamily;; Asparaginase	Hexose carrier protein HEX6 OS=Ricinus communis OX=3988 GN=HEX6 PE=2 SV=1	G	Carbohydrate transport and metabolism	sugar porter (SP) family MFS transporter [Medicago truncatula]	biological process: single-organism process (GO:0044699);; biological process: localization (GO:0051179);; molecular function: transporter activity (GO:0005215);; cellular component: cell (GO:0005623);; cellular component: membrane (GO:0016020);; cellular component: membrane part (GO:0044425);; cellular component: cell part (GO:0044464);; molecular function: catalytic activity (GO:0003824);; biol…	--
Medtr2g097390.JCVIMt4.0v1	c52473.graph_c0	614.33	24.16	224.33	9.19	1.6e-12	up	1.37721	--	--	Molecular Function: transcription factor activity, sequence-specific DNA binding (GO:0003700);; Cellular Component: nucleus (GO:0005634);; Biological Process: regulation of transcription, DNA-templated (GO:0006355);; Molecular Function: sequence-specific DNA binding (GO:0043565);;	--	--	--	GRAS domain family	Scarecrow-like protein 14 OS=Arabidopsis thaliana OX=3702 GN=SCL14 PE=2 SV=2	--	--	GRAS family transcription factor [Medicago truncatula]	biological process: biological regulation (GO:0065007);; molecular function: nucleic acid binding transcription factor activity (GO:0001071);; cellular component: cell (GO:0005623);; cellular component: organelle (GO:0043226);; cellular component: cell part (GO:0044464);; molecular function: binding (GO:0005488)	--
Medtr7g083890.JCVIMt4.0v1	c48074.graph_c1	27.67	2.4	8	0.66	0.00211007	up	1.37705	--	--	--	--	--	--	--	--	--	--	--	--	--
Medtr0148s0050.JCVIMt4.0v1	c52695.graph_c0	5080	100.03	1968.67	37.89	2.93e-59	up	1.37701	[K]	Transcription	--	--	[T]	Signal transduction mechanisms	Leucine Rich repeats (2 copies);; Leucine rich repeat;; Leucine-rich repeat;; Leucine Rich repeat	--	S	Function unknown	protein phosphatase 1 regulatory subunit, putative [Medicago truncatula]	--	--
Medtr3g061170.JCVIMt4.0v1	c37139.graph_c0	4538	546.63	1757.33	207.84	2.07e-25	up	1.36871	[O]	Posttranslational modification, protein turnover, chaperones	Cellular Component: chloroplast (GO:0009507);;	--	[O]	Posttranslational modification, protein turnover, chaperones	DnaJ domain	Chaperone protein dnaJ 11, chloroplastic OS=Arabidopsis thaliana OX=3702 GN=ATJ11 PE=1 SV=2	O	Posttranslational modification, protein turnover, chaperones	chaperone DnaJ domain protein [Medicago truncatula]	cellular component: cell (GO:0005623);; cellular component: organelle (GO:0043226);; cellular component: cell part (GO:0044464)	--
Medtr3g115050.JCVIMt4.0v1	c43665.graph_c0	1842	55.69	713.67	23.34	4.36e-22	up	1.36863	[DPM]	Cell cycle control, cell division, chromosome partitioning ;; Inorganic ion transport and metabolism ;; Cell wall/membrane/envelope biogenesis	Molecular Function: copper ion binding (GO:0005507);; Cellular Component: plant-type cell wall (GO:0009505);; Cellular Component: plasmodesma (GO:0009506);; Molecular Function: oxidoreductase activity, oxidizing metal ions (GO:0016722);; Biological Process: oxidation-reduction process (GO:0055114);;	--	[Q]	Secondary metabolites biosynthesis, transport and catabolism	Multicopper oxidase;; Multicopper oxidase;; Multicopper oxidase	L-ascorbate oxidase homolog OS=Brassica napus OX=3708 GN=Bp10 PE=2 SV=1	Q	Secondary metabolites biosynthesis, transport and catabolism	multi-copper oxidase-like protein [Medicago truncatula]	molecular function: binding (GO:0005488);; cellular component: cell (GO:0005623);; cellular component: cell part (GO:0044464);; cellular component: cell junction (GO:0030054);; cellular component: symplast (GO:0055044);; biological process: metabolic process (GO:0008152);; biological process: single-organism process (GO:0044699);; molecular function: catalytic activity (GO:0003824)	--
Medtr8g083090.JCVIMt4.0v1	c46323.graph_c0	26735.3	756.92	10429	291.56	7.47e-76	up	1.36575	[H]	Coenzyme transport and metabolism	Molecular Function: adenosylhomocysteinase activity (GO:0004013);; Cellular Component: cytosol (GO:0005829);; Biological Process: one-carbon metabolic process (GO:0006730);; Biological Process: S-adenosylmethionine cycle (GO:0033353);;	K01251|0|mtr:MTR_8g083090|K01251 adenosylhomocysteinase [EC:3.3.1.1] | (RefSeq) S-adenosyl-L-homocysteine hydrolase	[H]	Coenzyme transport and metabolism	S-adenosyl-L-homocysteine hydrolase;; S-adenosyl-L-homocysteine hydrolase, NAD binding domain;; D-isomer specific 2-hydroxyacid dehydrogenase, NAD binding domain;; Acetohydroxy acid isomeroreductase, NADPH-binding domain	Adenosylhomocysteinase OS=Medicago sativa OX=3879 GN=SAHH PE=2 SV=1	H	Coenzyme transport and metabolism	S-adenosyl-L-homocysteine hydrolase [Medicago truncatula]	molecular function: catalytic activity (GO:0003824);; cellular component: cell (GO:0005623);; cellular component: cell part (GO:0044464);; biological process: metabolic process (GO:0008152);; biological process: cellular process (GO:0009987);; biological process: single-organism process (GO:0044699)	Cysteine and methionine metabolism (ko00270)
--	c45650.graph_c0	832.33	60.18	322.33	21.17	3.32e-26	up	1.36505	--	--	--	--	--	--	--	--	--	--	--	--	--
Medtr3g467360.JCVIMt4.0v1	c41468.graph_c0	50.33	4.72	15	3.2	0.000748856	up	1.36501	--	--	--	--	--	--	--	--	--	--	--	--	--
Medtr1g070365.JCVIMt4.0v1	c37008.graph_c0	132	27.83	48.33	10.91	7.67e-09	up	1.36221	[QV]	Secondary metabolites biosynthesis, transport and catabolism ;; Defense mechanisms	Molecular Function: monooxygenase activity (GO:0004497);; Molecular Function: iron ion binding (GO:0005506);; Cellular Component: endoplasmic reticulum (GO:0005783);; Cellular Component: integral component of membrane (GO:0016021);; Molecular Function: oxidoreductase activity, acting on paired donors, with incorporation or reduction of molecular oxygen (GO:0016705);; Molecular Function: heme bind…	K20768|4.41003e-55|cam:101508331|K20768 cytochrome P450 family 94 subfamily A polypeptide 2 | (RefSeq) cytochrome P450 94A2-like	[QI]	--	--	Cytochrome P450 94A2 OS=Vicia sativa OX=3908 GN=CYP94A2 PE=2 SV=1	Q	Secondary metabolites biosynthesis, transport and catabolism	hypothetical protein TSUD_319430 [Trifolium subterraneum]	biological process: metabolic process (GO:0008152);; biological process: single-organism process (GO:0044699);; molecular function: catalytic activity (GO:0003824);; molecular function: binding (GO:0005488);; cellular component: cell (GO:0005623);; cellular component: organelle (GO:0043226);; cellular component: cell part (GO:0044464);; cellular component: membrane (GO:0016020);; cellular compone…	Cutin, suberine and wax biosynthesis (ko00073)
Medtr3g071890.JCVIMt4.0v1	c44100.graph_c0	372.33	13.4	139.67	5.73	7.3e-11	up	1.36128	[DPM]	Cell cycle control, cell division, chromosome partitioning ;; Inorganic ion transport and metabolism ;; Cell wall/membrane/envelope biogenesis	Molecular Function: copper ion binding (GO:0005507);; Molecular Function: oxidoreductase activity, oxidizing metal ions (GO:0016722);; Biological Process: lignin catabolic process (GO:0046274);; Cellular Component: apoplast (GO:0048046);; Molecular Function: hydroquinone:oxygen oxidoreductase activity (GO:0052716);; Biological Process: oxidation-reduction process (GO:0055114);;	K05909|0|mtr:MTR_3g071890|K05909 laccase [EC:1.10.3.2] | (RefSeq) laccase/diphenol oxidase family protein	[Q]	Secondary metabolites biosynthesis, transport and catabolism	Multicopper oxidase;; Multicopper oxidase;; Multicopper oxidase	Laccase-12 OS=Arabidopsis thaliana OX=3702 GN=LAC12 PE=2 SV=1	Q	Secondary metabolites biosynthesis, transport and catabolism	laccase/diphenol oxidase family protein [Medicago truncatula]	molecular function: binding (GO:0005488);; biological process: metabolic process (GO:0008152);; biological process: single-organism process (GO:0044699);; molecular function: catalytic activity (GO:0003824);; biological process: cellular process (GO:0009987);; cellular component: extracellular region (GO:0005576)	--
Medtr6g025680.JCVIMt4.0v1	c47378.graph_c0	75.33	4.07	26.33	1.49	1.58e-05	up	1.35897	--	--	Molecular Function: DNA binding (GO:0003677);; Cellular Component: nucleus (GO:0005634);; Biological Process: regulation of transcription, DNA-templated (GO:0006355);; Cellular Component: integral component of membrane (GO:0016021);;	--	--	--	Domain of unknown function (DUF4281)	Protein ABA DEFICIENT 4, chloroplastic OS=Arabidopsis thaliana OX=3702 GN=ABA4 PE=2 SV=1	S	Function unknown	neoxanthin synthase [Medicago truncatula]	molecular function: binding (GO:0005488);; cellular component: cell (GO:0005623);; cellular component: organelle (GO:0043226);; cellular component: cell part (GO:0044464);; biological process: biological regulation (GO:0065007);; cellular component: membrane (GO:0016020);; cellular component: membrane part (GO:0044425)	--
Medtr4g013770.JCVIMt4.0v1	c36512.graph_c0	225	15.86	36.33	2.96	0.0095945	up	1.35891	--	--	Biological Process: phenylpropanoid biosynthetic process (GO:0009699);; Molecular Function: guiding stereospecific synthesis activity (GO:0042349);;	--	--	--	Dirigent-like protein	Dirigent protein 19 OS=Arabidopsis thaliana OX=3702 GN=DIR19 PE=2 SV=1	S	Function unknown	disease resistance-responsive, dirigent domain protein [Medicago truncatula]	biological process: metabolic process (GO:0008152);; biological process: cellular process (GO:0009987);; biological process: single-organism process (GO:0044699);; biological process: biological regulation (GO:0065007);; molecular function: molecular function regulator (GO:0098772)	--
Medtr1g063070.JCVIMt4.0v1	c42876.graph_c0	532.67	28.55	204	11.21	1.84e-20	up	1.35778	--	--	Cellular Component: plasma membrane (GO:0005886);; Cellular Component: integral component of membrane (GO:0016021);; Biological Process: respiratory electron transport chain (GO:0022904);;	--	--	--	Protein of unknown function (DUF4079);; Eukaryotic cytochrome b561	--	S	Function unknown	transmembrane protein, putative [Medicago truncatula]	cellular component: cell (GO:0005623);; cellular component: membrane (GO:0016020);; cellular component: cell part (GO:0044464);; cellular component: membrane part (GO:0044425);; biological process: metabolic process (GO:0008152);; biological process: cellular process (GO:0009987);; biological process: single-organism process (GO:0044699)	--
--	c17783.graph_c0	681.33	17.67	258.33	6.83	8.63e-21	up	1.35744	--	--	--	--	--	--	--	--	--	--	--	--	--
Medtr4g133660.JCVIMt4.0v1	c46754.graph_c0	9615.67	222.33	3649.67	85.96	8.06e-24	up	1.35724	--	--	Molecular Function: transcription factor activity, sequence-specific DNA binding (GO:0003700);; Cellular Component: nucleus (GO:0005634);; Biological Process: regulation of transcription, DNA-templated (GO:0006355);; Molecular Function: sequence-specific DNA binding (GO:0043565);;	--	--	--	GRAS domain family	Scarecrow-like protein 13 OS=Arabidopsis thaliana OX=3702 GN=SCL13 PE=2 SV=2	K	Transcription	GRAS family transcription factor [Medicago truncatula]	biological process: biological regulation (GO:0065007);; molecular function: nucleic acid binding transcription factor activity (GO:0001071);; cellular component: cell (GO:0005623);; cellular component: organelle (GO:0043226);; cellular component: cell part (GO:0044464);; molecular function: binding (GO:0005488)	--
Medtr1g102360.JCVIMt4.0v1	c37634.graph_c0	38.67	3.46	12	1.08	0.000780997	up	1.35666	--	--	Molecular Function: protein serine/threonine kinase activity (GO:0004674);; Molecular Function: transmembrane receptor protein tyrosine kinase activity (GO:0004714);; Molecular Function: ATP binding (GO:0005524);; Cellular Component: plasma membrane (GO:0005886);; Cellular Component: integral component of membrane (GO:0016021);; Biological Process: peptidyl-tyrosine phosphorylation (GO:0018108);;	--	[T]	Signal transduction mechanisms	--	Receptor-like serine/threonine-protein kinase At2g45590 OS=Arabidopsis thaliana OX=3702 GN=At2g45590 PE=2 SV=1	T	Signal transduction mechanisms	receptor-like Serine/Threonine-kinase plant [Medicago truncatula]	biological process: metabolic process (GO:0008152);; biological process: cellular process (GO:0009987);; molecular function: catalytic activity (GO:0003824);; biological process: signaling (GO:0023052);; biological process: single-organism process (GO:0044699);; biological process: response to stimulus (GO:0050896);; biological process: biological regulation (GO:0065007);; molecular function: sig…	--
Medtr4g114320.JCVIMt4.0v1	c45518.graph_c0	410	14.08	158.67	5.21	3.29e-20	up	1.35425	--	--	Molecular Function: structural constituent of ribosome (GO:0003735);; Biological Process: translation (GO:0006412);; Cellular Component: integral component of membrane (GO:0016021);; Biological Process: transmembrane transport (GO:0055085);;	K14684|0|mtr:MTR_4g114320|K14684 solute carrier family 25 (mitochondrial phosphate transporter), member 23/24/25/41 | (RefSeq) substrate carrier family protein	[C]	Energy production and conversion	Mitochondrial carrier protein;; Mitochondrial carrier protein	Adenine nucleotide transporter BT1, chloroplastic/mitochondrial OS=Arabidopsis thaliana OX=3702 GN=BT1 PE=1 SV=1	S	Function unknown	substrate carrier family protein [Medicago truncatula]	molecular function: structural molecule activity (GO:0005198);; biological process: metabolic process (GO:0008152);; biological process: cellular process (GO:0009987);; cellular component: membrane (GO:0016020);; cellular component: membrane part (GO:0044425);; biological process: localization (GO:0051179)	--
Medtr8g467150.JCVIMt4.0v1	c44070.graph_c0	79.33	1.79	27.67	0.63	1.25e-05	up	1.35393	[T]	Signal transduction mechanisms	Molecular Function: protein serine/threonine kinase activity (GO:0004674);; Molecular Function: ATP binding (GO:0005524);; Biological Process: protein phosphorylation (GO:0006468);; Cellular Component: integral component of membrane (GO:0016021);;	K04733|0|mtr:MTR_8g467150|K04733 interleukin-1 receptor-associated kinase 4 [EC:2.7.11.1] | (RefSeq) receptor-like kinase, putative	[T]	Signal transduction mechanisms	Protein tyrosine kinase;; Protein kinase domain;; Carbohydrate-binding protein of the ER;; Di-glucose binding within endoplasmic reticulum	Receptor-like protein kinase THESEUS 1 OS=Arabidopsis thaliana OX=3702 GN=THE1 PE=1 SV=1	T	Signal transduction mechanisms	receptor-like kinase, putative [Medicago truncatula]	biological process: metabolic process (GO:0008152);; biological process: cellular process (GO:0009987);; molecular function: catalytic activity (GO:0003824);; molecular function: binding (GO:0005488);; cellular component: membrane (GO:0016020);; cellular component: membrane part (GO:0044425)	--
Medtr3g093430.JCVIMt4.0v1	c47475.graph_c0	92.33	2.37	32.67	0.54	7.38e-06	up	1.35299	[V]	Defense mechanisms	Molecular Function: ATP binding (GO:0005524);; Biological Process: drug transmembrane transport (GO:0006855);; Molecular Function: xenobiotic-transporting ATPase activity (GO:0008559);; Cellular Component: integral component of membrane (GO:0016021);; Biological Process: xenobiotic transport (GO:0042908);;	K05658|0|mtr:MTR_3g093430|K05658 ATP-binding cassette, subfamily B (MDR/TAP), member 1 [EC:3.6.3.44] | (RefSeq) ABC transporter B family protein	[Q]	Secondary metabolites biosynthesis, transport and catabolism	ABC transporter;; ABC transporter transmembrane region;; Peptidase family C78;; ABC transporter	ABC transporter B family member 14 OS=Arabidopsis thaliana OX=3702 GN=ABCB14 PE=3 SV=1	V	Defense mechanisms	ABC transporter B family protein [Medicago truncatula]	molecular function: binding (GO:0005488);; biological process: single-organism process (GO:0044699);; biological process: response to stimulus (GO:0050896);; biological process: localization (GO:0051179);; molecular function: catalytic activity (GO:0003824);; molecular function: transporter activity (GO:0005215);; cellular component: membrane (GO:0016020);; cellular component: membrane part (GO:0…	ABC transporters (ko02010)
Medtr4g061200.JCVIMt4.0v1	c49646.graph_c0	422	12.38	161	5.21	3.35e-18	up	1.35201	--	--	Molecular Function: DNA binding (GO:0003677);; Molecular Function: transcription factor activity, sequence-specific DNA binding (GO:0003700);; Cellular Component: nucleus (GO:0005634);; Biological Process: regulation of transcription, DNA-templated (GO:0006355);; Biological Process: vegetative to reproductive phase transition of meristem (GO:0010228);; Biological Process: plant organ morphogenesi…	K09284|2.61008e-139|mtr:MTR_4g061200|K09284 AP2-like factor, euAP2 lineage | (RefSeq) AP2-like ethylene-responsive transcription factor	--	--	AP2 domain	Ethylene-responsive transcription factor RAP2-7 OS=Arabidopsis thaliana OX=3702 GN=RAP2-7 PE=2 SV=2	K	Transcription	AP2-like ethylene-responsive transcription factor [Medicago truncatula]	molecular function: binding (GO:0005488);; biological process: biological regulation (GO:0065007);; molecular function: nucleic acid binding transcription factor activity (GO:0001071);; cellular component: cell (GO:0005623);; cellular component: organelle (GO:0043226);; cellular component: cell part (GO:0044464);; biological process: reproduction (GO:0000003);; biological process: reproductive pr…	--
Medtr3g467100.JCVIMt4.0v1	c39663.graph_c0	1203.33	143.71	415.67	51.6	9.96e-06	up	1.34979	--	--	Biological Process: lipid transport (GO:0006869);; Molecular Function: lipid binding (GO:0008289);;	--	--	--	--	Non-specific lipid-transfer protein OS=Prunus avium OX=42229 PE=1 SV=1	--	--	Lipid transfer protein [Medicago truncatula]	biological process: single-organism process (GO:0044699);; biological process: localization (GO:0051179);; molecular function: binding (GO:0005488)	--
Medtr3g103270.JCVIMt4.0v1	c42392.graph_c1	885	46.16	348.67	17.69	1.38e-33	up	1.34961	--	--	--	K07870|4.7348e-06|mtr:MTR_8g010670|K07870 Ras homolog gene family, member T1 | (RefSeq) MIRO-like protein	--	--	--	--	--	--	--	--	--
--	c42658.graph_c0	46.33	4.29	15.67	1.16	0.00021433	up	1.34922	--	--	--	--	--	--	--	--	--	--	--	--	--
Medtr3g088815.JCVIMt4.0v1	c39444.graph_c0	261.33	10.02	98.33	4.03	3.51e-12	up	1.34877	--	--	--	--	--	--	--	--	S	Function unknown	hypothetical protein MTR_3g088815 [Medicago truncatula]	--	--
--	c53860.graph_c0	82.33	18.48	29.67	6.61	1.18e-05	up	1.34686	--	--	--	--	--	--	--	--	--	--	--	--	--
--	c49739.graph_c1	93	4.18	33.33	1.53	6.07e-06	up	1.346	--	--	--	--	--	--	--	--	--	--	--	--	--
--	c47278.graph_c1	195.33	4.95	68.33	3.02	1.15e-06	up	1.34577	--	--	--	--	--	--	--	--	--	--	--	--	--
--	c39417.graph_c0	52	4.35	18	1.48	0.000108952	up	1.34453	--	--	--	--	--	--	--	--	--	--	--	--	--
--	c43677.graph_c0	65	6.31	21.67	2.52	0.000105895	up	1.34348	--	--	--	--	--	--	--	--	--	--	--	--	--
Medtr2g095320.JCVIMt4.0v1	c42893.graph_c0	1218.67	25.06	471.33	9.65	3.64e-28	up	1.34348	[O]	Posttranslational modification, protein turnover, chaperones	Molecular Function: ATP binding (GO:0005524);; Cellular Component: plasma membrane (GO:0005886);; Biological Process: cell cycle (GO:0007049);; Molecular Function: microtubule-severing ATPase activity (GO:0008568);; Biological Process: cell division (GO:0051301);;	K13525|0|cam:101502173|K13525 transitional endoplasmic reticulum ATPase | (RefSeq) cell division cycle protein 48 homolog	[O]	Posttranslational modification, protein turnover, chaperones	ATPase family associated with various cellular activities (AAA);; Cell division protein 48 (CDC48), N-terminal domain;; AAA ATPase domain;; Holliday junction DNA helicase ruvB N-terminus;; AAA domain (Cdc48 subfamily);; Cell division protein 48 (CDC48), domain 2;; AAA domain;; AAA domain;; AAA domain (dynein-related subfamily);; TIP49 C-terminus;; AAA domain;; AAA domain;; RNA helicase;; Magnesiu…	Cell division cycle protein 48 homolog OS=Glycine max OX=3847 GN=CDC48 PE=2 SV=1	O	Posttranslational modification, protein turnover, chaperones	PREDICTED: cell division cycle protein 48 homolog [Cicer arietinum]	molecular function: binding (GO:0005488);; cellular component: cell (GO:0005623);; cellular component: membrane (GO:0016020);; cellular component: cell part (GO:0044464);; biological process: cellular process (GO:0009987);; biological process: single-organism process (GO:0044699);; biological process: cellular component organization or biogenesis (GO:0071840);; molecular function: catalytic activ…	Protein processing in endoplasmic reticulum (ko04141)
[truncated: 1,073 more rows]

## Sheet: (ND+LT)VS ND
#GeneID	ID	ND+LT_count	ND+LT_FPKM	ND_count	ND_FPKM	(ND+LT)_vs_ND_DESeq2_FDR	(ND+LT)_vs_ND_DESeq2_log2FC	(ND+LT)_vs_ND_DESeq2_(FDR_0.01_FC_2)_regulated	COG_class	COG_class_annotation	GO_annotation	KEGG_annotation	KOG_class	KOG_class_annotation	Pfam_annotation	Swissprot_annotation	eggNOG_class	eggNOG_class_annotation	nr_annotation	GO_second_level_annotation	KEGG_pathway_annotation
[truncated: 1,248 more rows]

[truncated: 2 more sheets: D VS ND, (D+LT) VS (ND+LT)]
