# Supplementary material for: Identification and Characterization of Regulatory Pathways Controlling Dormancy Under Lower Temperature in Alfalfa (Medicago sativa L.)
Source: Front Plant Sci. 2022 Jun 2;13:872839. doi: 10.3389/fpls.2022.872839 (PMC9201922; doi:10.3389/fpls.2022.872839)
Supplement: Supplementary Table 3 — Mapman pathway enrichment analysis of DEGs in dormancy (D) and non-dormancy (ND) genotype alfalfa under lower temperature (LT) condition. [file Table_3.XLSX]

## Sheet: Flavonoids biosynthesis
M. truncatula ID	Unigene	(D+LT)/D	(ND+LT)/ND	D/ND	(D+LT)/(ND+LT)	Annotation
medtr7g062570.1	c40890.graph_c1	-1.48739	1.8107	5.43996	1.69664	2OG oxygenase superfamily protein
medtr5g065010.1	c35374.graph_c0	-1.18261	-2.93918	-3.57382	-1.72638	2OG oxygenase superfamily protein
medtr8g074050.1	c46042.graph_c1	-1.1453				2OG oxygenase superfamily protein
medtr7g068650.1	c36200.graph_c1	1.44167				2OG oxygenase superfamily protein
medtr5g082750.1	c42733.graph_c0	1.96763	1.51561			2OG oxygenase superfamily protein
medtr1g070085.1	c43239.graph_c0	-1.25821		1.1771		2OG oxygenase superfamily protein
medtr3g092890.1	c40782.graph_c0	2.01925		-2.15038		2OG oxygenase superfamily protein
medtr6g084770.1	c43229.graph_c0	-1.82619		2.15149		Cytochrome P450,CYP71A22
medtr7g102490.1	c45385.graph_c0	1.73521	1.39678			Don-glucosyltransferase 1
medtr7g102560.1	c36516.graph_c0		1.33781			Don-glucosyltransferase 1
medtr5g070830.1	c51441.graph_c0		-1.24372			Ferulic acid 5-hydroxylase 1
medtr5g059140.1	c47669.graph_c0	1.06479				Flavonol synthase 1
medtr6g015320.1	c41287.graph_c0	-1.332		4.41371	2.6465	Acyl-transferase family protein
medtr5g081960.1	c50222.graph_c0	1.18587				Acyl-transferase family protein
medtr7g015860.1	c41462.graph_c0		-1.27404	2.07957	3.03965	Acyl-transferase family protein
medtr3g007970.1	c45705.graph_c1	-1.23293		1.86724	1.21545	Isoflavone reductase
medtr5g011250.1	c36471.graph_c0	3.69823			2.85146	Leucoanthocyanidin dioxygenase
medtr6g072710.1	c51328.graph_c0	1.0655				Oxidoreductase superfamily protein
medtr4g021350.1	c42997.graph_c0		1.43707		-1.76091	Oxidoreductase superfamily protein
medtr7g063580.1	c47857.graph_c0		1.14163	2.08789	1.17972	Oxidoreductase superfamily protein
medtr4g070340.1	c44522.graph_c0	-2.22482		2.98616	2.58365	Phenylcoumaran benzylic ether reductase
medtr3g116840.1	c36572.graph_c0	1.16586	1.93278			Phenylcoumaran benzylic ether reductase
medtr5g048550.1	c43739.graph_c2	1.49016			1.93707	Senescence-related gene 1
medtr5g048470.1	c46723.graph_c0		-2.25801	1.00075	2.62288	Senescence-related gene 1
medtr3g083920.1	c41285.graph_c0	1.52764	1.07981			Chalcone synthase 1A
medtr7g084300.1	c35102.graph_c0	2.22871			1.49835	Chalcone synthase 1A
medtr1g115840.1	c50015.graph_c0	-2.09311	-2.7832			Chalcone--flavonone isomerase
medtr8g020950.1	c48733.graph_c0	1.41046			1.32242	Flavonoid 3'-monooxygenase
medtr3g025260.1	c40989.graph_c0	2.8966				Flavonoid 3'-monooxygenase
medtr8g027885.1	c52251.graph_c1	-1.23126		-1.5791	-2.27703	UDP-glycosyltransferase 72B1
medtr8g012635.1	c50658.graph_c0	1.14639			1.34166	UDP-glycosyltransferase 72B1
medtr6g005600.1	c30913.graph_c0	1.75105			1.3994	UDP-glycosyltransferase 72B1
medtr4g485630.1	c40043.graph_c0		1.15088			UDP-glucosyltransferase 73B3
medtr2g035040.1	c51610.graph_c3	-1.04585		1.23791		UDP-glycosyltransferase 73B4
medtr8g044140.1	c53402.graph_c0		1.28957			UDP-glycosyltransferase 73B4
medtr2g035020.1	c46244.graph_c0	-1.16766				UDP-glycosyltransferase 73B4
medtr4g485640.1	c43302.graph_c0	1.69553	2.12488	1.82057		UDP-glycosyltransferase 73B4
medtr6g035295.1	c39205.graph_c0	-1.10667				UDP-glucosyltransferase 73B5
medtr7g102450.1	c36341.graph_c0	1.71743	1.52818			UDP-glucosyltransferase 73C1
medtr4g128690.1	c37776.graph_c0	1.47353		2.29551	3.43014	UDP-glucosyltransferase 78D2
medtr2g046620.1	c39263.graph_c0	-2.22273		2.02088		UDP-Glycosyltransferase superfamily protein
medtr6g042310.1	c42047.graph_c0	-2.14427		1.16245		UDP-Glycosyltransferase superfamily protein
medtr8g068340.1	c50039.graph_c0	-1.27587		1.44548		UDP-Glycosyltransferase superfamily protein
medtr4g123553.1	c49812.graph_c0	-1.24289				UDP-Glycosyltransferase superfamily protein
medtr7g117405.1	c34472.graph_c0	1.51282	3.44201		-2.46847	UDP-Glycosyltransferase superfamily protein

## Sheet: Receptor-like Kinase
M. truncatula ID	Unigene	(D+LT)/D	(ND+LT)/ND	D/ND	(D+LT)/(ND+LT)	Annotation
medtr7g099220.1	c50591.graph_c0		1.09093			Abnormal leaf shape 2
medtr4g035180.1	c52483.graph_c0	1.55897			3.02957	CRINKLY4 related 4
medtr8g041890.1	c43165.graph_c0		-1.54008	1.38871	3.80886	Cysteine-rich RLK 10
medtr3g011930.1	c47695.graph_c0		-1.28051	-1.35865		Cysteine-rich RLK 10
medtr1g105640.1	c48950.graph_c0		-1.35206			Cysteine-rich RLK 25
medtr6g057750.1	c51283.graph_c2	1.41587		-1.72457		Cysteine-rich RLK 25
medtr6g463830.1	c51478.graph_c1	2.11063			2.16687	Cysteine-rich RLK 25
medtr1g105700.1	c44254.graph_c0	1.50571	-1.3599	-3.0473		Cysteine-rich RLK 26
medtr1g021642.1	c33185.graph_c0		-1.74187			Cysteine-rich RLK 29
medtr1g105840.1	c33768.graph_c0	1.53715		3.97659	4.70282	Cysteine-rich RLK 29
medtr1g105860.1	c39054.graph_c0	-2.98602				Cysteine-rich RLK 29
medtr1g105850.1	c44722.graph_c0		-1.17026			Cysteine-rich RLK 29
medtr1g021610.1	c47403.graph_c0	1.53278				Cysteine-rich RLK 29
medtr1g105820.1	c51345.graph_c1	1.66088			1.25837	Cysteine-rich RLK 29
medtr6g463700.1	c51283.graph_c3	1.38514				Cysteine-rich RLK 8
medtr4g128990.1	c43769.graph_c0	1.27172	1.15999			Cytoplasmatic kinase IX
medtr7g084250.1	c38875.graph_c0		1.49581			Cytoplasmatic kinase VI
medtr1g102360.1	c38339.graph_c0	1.58558			3.40349	Cytoplasmatic kinase X
medtr4g093110.1	c39434.graph_c0	1.22511			2.19776	Lectin protein kinase family protein
medtr1g090937.1	c39704.graph_c0	-1.62216		-3.10017	-4.97378	Lectin protein kinase family protein
medtr7g063010.1	c48353.graph_c1	1.03065			1.08622	Lectin protein kinase family protein
medtr5g025020.1	c50908.graph_c1	-1.94672		2.27113		Lectin protein kinase family protein
medtr2g090410.1	c53353.graph_c0	1.02262			1.27504	Lectin protein kinase family protein
medtr8g015040.1	c39517.graph_c0	1.49975		-2.51597		Leucine rich repeat I
medtr8g015190.1	c41047.graph_c0	1.3123		-2.32953	1.59267	Leucine rich repeat I
medtr1g107460.1	c44061.graph_c0		-2.28681			Leucine rich repeat III
medtr4g094958.1	c52064.graph_c1	1.11634		1.19627	2.75501	Leucine rich repeat III
medtr6g027720.1	c49847.graph_c0	1.85862	1.30131			Leucine rich repeat VI
medtr8g044230.1	c53034.graph_c0	1.22452			1.1127	Leucine rich repeat VI
medtr2g014960.1	c48802.graph_c0	1.32953			1.0695	Leucine rich repeat VIII-1
medtr3g062570.1	c50689.graph_c0	-1.16528		3.567	2.47212	Leucine rich repeat VIII-1
medtr8g070880.1	c53488.graph_c0		-1.14135			Leucine rich repeat VIII-1
medtr2g075140.1	c26419.graph_c0		-1.90453			Leucine rich repeat VIII-2
medtr2g074980.1	c35748.graph_c0		1.02948			Leucine rich repeat VIII-2
medtr5g014700.1	c32197.graph_c0	1.1599				Leucine rich repeat XI
medtr2g090710.1	c44800.graph_c0	2.08503			3.49611	Leucine rich repeat XI
medtr5g014720.1	c50011.graph_c0	1.42435				Leucine rich repeat XI
medtr2g010470.1	c51942.graph_c0	1.29437				Leucine rich repeat XI
medtr2g016530.1	c35827.graph_c0		-1.77785		2.12332	Leucine rich repeat XII
medtr6g040210.1	c38090.graph_c0		-2.3916		2.59727	Leucine rich repeat XII
medtr8g469710.1	c39695.graph_c0	1.3108				Leucine rich repeat XII
medtr1g040555.1	c46817.graph_c0	1.03589			2.89791	Leucine rich repeat XII
medtr7g407090.1	c48261.graph_c0	1.17556		1.5076	2.45667	Leucine rich repeat XII
medtr5g082460.1	c49341.graph_c0	1.12668			2.10281	Leucine rich repeat XII
medtr3g092390.1	c51654.graph_c0		-1.35065		2.80202	Leucine rich repeat XII
medtr2g016580.1	c53040.graph_c0		-1.36065	1.04436	2.18393	Leucine rich repeat XII
medtr7g446160.1	c53615.graph_c2	1.1461				Leucine rich repeat XII
medtr8g469720.1	c53678.graph_c0	1.26699				Leucine rich repeat XII
medtr8g469600.1	c53678.graph_c1		-1.05925	-1.66122		Leucine rich repeat XII
medtr5g085790.1	c33567.graph_c0	1.12631		2.13739	3.58015	LysM receptor-like kinase
medtr5g019050.1	c45468.graph_c0	1.62074				LysM receptor-like kinase
medtr5g086030.1	c46197.graph_c3	1.02052				LysM receptor-like kinase
medtr1g044580.1	c49209.graph_c0	1.16925		-1.79385	-1.04137	Plasmodesmata-located protein 2
medtr7g102380.1	c30573.graph_c0	4.8487				PR-thaumatin superfamily protein
medtr1g062590.1	c45324.graph_c1	2.85297			2.20384	PR-thaumatin superfamily protein
medtr6g083270.1	c46340.graph_c2		-1.374		3.08456	PR-thaumatin superfamily protein
medtr2g006910.1	c40395.graph_c1		1.12813			Receptor kinases RKF3 like
medtr1g031780.1	c45762.graph_c0		-1.10878		1.33445	Receptor kinases.DUF 26
medtr8g052190.1	c35538.graph_c0	-1.80934		4.51744	2.12673	S-locus glycoprotein like
medtr4g091670.1	c38286.graph_c0	1.32365				S-locus glycoprotein like
medtr6g043790.1	c43917.graph_c0	1.16642				S-locus glycoprotein like
medtr3g011930.1	c47695.graph_c0		-1.28051	-1.35865		S-locus glycoprotein like
medtr7g056450.1	c49873.graph_c0	1.4566			1.26462	S-locus glycoprotein like
medtr8g013610.1	c49873.graph_c1	1.73617			1.6114	S-locus glycoprotein like
medtr7g056640.1	c51128.graph_c1		-1.09827	-2.86244	-1.38374	S-locus glycoprotein like
medtr4g081665.1	c52734.graph_c0	1.32488			1.44328	S-locus glycoprotein like
medtr7g056667.1	c52753.graph_c0		-1.08368			S-locus glycoprotein like
medtr8g465160.1	c52962.graph_c0	1.1684		-1.21435		S-locus glycoprotein like
medtr3g020320.1	c53659.graph_c0		-1.03836		1.04238	S-locus glycoprotein like
medtr1g010250.1	c52642.graph_c0		-1.08465			Wall associated kinase 5
medtr1g027050.1	c42192.graph_c1	1.78771			3.45777	Wheat LRK10 like
medtr2g036430.1	c43613.graph_c0		-1.28572			Wheat LRK10 like
medtr6g083270.1	c46340.graph_c2		-1.374		3.08456	Wheat LRK10 like
medtr4g073220.1	c48439.graph_c0	1.40699		-3.10013	-1.36101	Wheat LRK10 like
medtr7g085860.1	c48648.graph_c1	2.00222				Wheat LRK10 like
medtr1g110160.1	c49518.graph_c1	1.10349		-3.46202	-1.45949	Wheat LRK10 like
medtr5g055310.1	c50971.graph_c0		-1.16208			Wheat LRK10 like
medtr1g110220.1	c52140.graph_c0		-1.23721		2.08401	Wheat LRK10 like
medtr2g036460.1	c52540.graph_c0		-1.50629		4.50265	Wheat LRK10 like
medtr6g082810.1	c52663.graph_c0		-1.6212		1.98128	Wheat LRK10 like
medtr6g083020.1	c52885.graph_c0	1.15792			2.1347	Wheat LRK10 like

## Sheet: RNA-and-protein synthesis
M. truncatula ID	Unigene	(D+LT)/D	(ND+LT)/ND	D/ND	(D+LT)/(ND+LT)	Annotation
medtr5g016220.1	c34725.graph_c0		-1.22819			DNA-dependent RNA polymerases
medtr7g066240.1	c35795.graph_c0		-1.29064			DNA-dependent RNA polymerases
medtr6g088010.1	c35925.graph_c0		-1.60464		1.69306	DNA-dependent RNA polymerases
medtr6g042230.1	c45276.graph_c0		-1.54235			DNA-dependent RNA polymerases
medtr8g065900.1	c52616.graph_c1		-1.42955	-1.50163		Male gametophyte defective 3
medtr4g086290.1	c44608.graph_c0		-1.40117			Nuclear RNA polymerase A1
medtr4g124030.1	c49755.graph_c0		-1.08386			Nuclear RNA polymerase A2
medtr3g105990.1	c40006.graph_c0	-1.07165	-1.16443			Nuclear RNA polymerase D2A
medtr1g072690.1	c50737.graph_c0		1.04798			Plastid transcriptionally active 5
medtr7g020830.1	c32705.graph_c0		-1.51902		1.83524	RNA polymerase 14 kDa subunit
medtr3g060690.1	c45807.graph_c0		-1.55024	-1.53253		RNA polymerase I subunit 43
medtr4g075600.1	c17691.graph_c0		-2.1043	1.83628	4.12254	RNA polymerases N / 8 kDa subunit
medtr4g106660.1	c52023.graph_c0	-1.0776				RNA-dependent RNA polymerase 2
medtr6g088660.1	c50406.graph_c1		2.32544		-2.15905	RNA-dependent RNA polymerase family protein
medtr8g027190.1	c50308.graph_c0		-1.03278			Arginine/serine-rich splicing factor
medtr6g004480.1	c50782.graph_c0		-1.28561		1.24781	RNA-binding CRS1 / YhbY (CRM) domain protein
medtr7g112760.1	c45064.graph_c0	-3.05094	-1.34958			Serine arginine protein 30
medtr1g054630.1	c38153.graph_c0		1.11712			ATPase activity
medtr5g090120.1	c49304.graph_c0	1.20773		-1.44351		Putative mitochondrial RNA helicase 2
medtr2g019210.1	c46092.graph_c0		-1.35963			ECERIFERUM 7 (CER7)
medtr4g121550.1	c38186.graph_c0		-1.05373			Ribosomal RNA processing 4
medtr8g066730.1	c36153.graph_c0		-1.10927			Zinc finger family protein
medtr3g105390.1	c46513.graph_c1		-1.28768			Dicer-like 3
medtr8g014560.1	c46963.graph_c1	1.11258	1.08093			Poly(A) polymerase 2
medtr4g122070.1	c45521.graph_c0		-1.78664	-2.79605		Fip1 motif-containing protein
medtr1g032500.1	c51739.graph_c0		-1.05088	-1.51627		Cleavage and polyadenylation specificity factor CPSF73b
medtr7g016960.1	c43015.graph_c0	1.1302				CHLORORESPIRATORY REDUCTION 2
medtr7g037560.1	c43736.graph_c1		1.43555		-1.41917	Embryo defective 1220
medtr6g047580.1	c43600.graph_c0		-2.30417	-2.06347		Fibrillarin 2
medtr7g076280.1	c36268.graph_c0		-2.04871	-1.01094		PALEFACE 1
medtr3g498785.1	c35119.graph_c0		-1.31862	-2.06573		Polynucleotide adenylyltransferase family protein
medtr8g099900.1	c42035.graph_c0		-2.31893	-1.42785		Polynucleotide adenylyltransferase family protein
medtr6g005460.1	c45945.graph_c0		-1.82306	-2.49936		Polyribonucleotide nucleotidyltransferase
medtr8g098715.1	c38940.graph_c0		-1.78295	-1.86315		RNA cyclase family protein
medtr8g105890.1	c33969.graph_c0		-1.0183	-1.15535		Small nuclear ribonucleoprotein family protein
medtr5g092010.1	c45666.graph_c0		-1.1957			Small nuclear ribonucleoprotein family protein
medtr1g032580.1	c45751.graph_c0	-1.14902				Sec14p-like phosphatidylinositol transfer family protein
medtr7g056587.1	c46615.graph_c0	1.17702	1.31711			Sec14p-like phosphatidylinositol transfer family protein
medtr1g106775.1	c39317.graph_c0	1.67443				Peroxisomal membrane 22 kDa family protein
medtr3g098820.1	c10040.graph_c0		-1.45577	-1.37923		Translocase inner membrane subunit 8
medtr6g044560.1	c44330.graph_c0		-1.55988	-1.21307		Translocase of outer membrane 20 kDa subunit 3
medtr2g097700.1	c44238.graph_c1	1.21948			1.44659	Translocon at the outer envelope membrane of chloroplasts 75-III
medtr4g064780.1	c48980.graph_c0		-1.12444	-1.2463		Translocon at the outer envelope membrane of chloroplasts 75-III
medtr1g082380.1	c33961.graph_c0		-1.56574	-1.57044		Mitochondrial inner membrane translocase complex, subunit Tim44-related protein
medtr2g006020.1	c41449.graph_c0		-1.52871	-1.36405		Transducin/WD40 repeat-like superfamily protein
medtr2g009800.1	c49430.graph_c0		-1.4247			Transducin/WD40 repeat-like superfamily protein
medtr3g082840.1	c46336.graph_c0	-1.01729				WD-40 repeat family protein
medtr4g105700.1	c31070.graph_c0		-1.37938	-1.62506		WD-40 repeat protein
medtr5g092370.1	c53625.graph_c0		-1.52659	-2.14568		ARM repeat superfamily protein
medtr7g085640.1	c33180.graph_c0		-2.85395	-2.42274		H/ACA ribonucleoprotein complex, subunit Gar1/Naf1 protein
medtr4g074160.1	c47271.graph_c0		-2.01112	-2.2005		Homologue of NAP57
medtr8g069770.1	c34068.graph_c0		-1.66132	-2.01099		NOP10
medtr7g097110.1	c36826.graph_c0		-2.04941	-2.21748		NOP10
medtr4g112780.1	c32689.graph_c0		-1.76459	-1.39844		Ribosomal protein L7Ae/L30e/S12e/Gadd45 family protein
medtr5g010260.1	c44356.graph_c0		-2.19238			SAR DNA-binding protein-1
medtr4g103790.1	c47513.graph_c0		-2.26491	-1.59378		SAR DNA-binding protein-1
medtr5g028350.1	c41664.graph_c0		-1.55867	-1.33841		rRNA processing protein-related
medtr4g078640.1	c41162.graph_c0		-1.4019	-1.70195		FtsJ-like methyltransferase family protein
medtr5g079860.1	c44152.graph_c1		-1.76488	-1.31679		Radical SAM superfamily protein
medtr3g460700.1	c39983.graph_c0		-1.79048	-1.82215		S-adenosyl-L-methionine-dependent methyltransferases superfamily protein
medtr8g101340.1	c40868.graph_c0		-1.12846	-1.06334		Hua enhancer 2
medtr4g023590.1	c52744.graph_c0		-2.05217		1.64789	Pre-rRNA processing and modifications
medtr5g027840.1	c38664.graph_c0		-1.34296		1.02058	Stress response supperssor 1
medtr1g048030.1	c49886.graph_c0		-1.56831	-1.8005		GTP-binding family protein
medtr8g018150.1	c53146.graph_c0		-1.49309	-1.36787		Nucleolar GTP-binding protein
medtr4g068150.1	c48550.graph_c1		-1.2738	-1.22714		ATPase activity
medtr3g049990.1	c52808.graph_c0		-1.16274	-2.04188		RNA helicase family protein
medtr8g061260.1	c48937.graph_c0		-2.82666		1.87631	Ribosomal protein L11 methyltransferase-related
medtr3g112090.1	c24789.graph_c0		-1.612	-2.60516		RNA binding
medtr3g086000.1	c51027.graph_c0		1.08412	1.11978		Zincin-like metalloproteases family protein
medtr4g068770.1	c36923.graph_c0	3.47326	2.90668			Uncharacterised protein family
medtr7g083650.1	c36841.graph_c0		-1.26063			Ribosomal L18p/L5e family protein
medtr4g034720.1	c44744.graph_c1		1.08338			Ribosomal protein L20
medtr3g058620.1	c40265.graph_c0		-1.00243			Ribosomal protein L19 family protein
medtr4g051220.1	c47040.graph_c1	1.097				Chloroplast ribosomal protein S4
medtr3g092720.1	c38377.graph_c0		1.53148		-1.42276	30S ribosomal protein
medtr2g064460.1	c48840.graph_c0		-1.83117	-2.23173		Ribosomal protein L1p/L10e family
medtr8g024350.1	c36785.graph_c0		-1.66928			60S acidic ribosomal protein family
medtr2g007780.1	c33842.graph_c0		-1.65888	-1.73917		Ribosomal protein L10 family protein
medtr3g093110.1	c35440.graph_c0		-1.25402			60S ribosomal protein L9
medtr5g068780.1	c37181.graph_c0		-1.98097	-2.99554		60S ribosomal protein L9
medtr4g114330.1	c32963.graph_c0		-1.34844	-1.08833		Ribosomal protein L7Ae/L30e/S12e/Gadd45 family protein
medtr4g008160.1	c36704.graph_c0		-1.2742	-1.17952		Ribosomal protein L30/L7 family protein
medtr7g059170.1	c42079.graph_c0		-1.23143			Ribosomal protein L30/L7 family protein
medtr3g094860.1	c44009.graph_c0		-1.32026	-1.06492		Ribosomal protein L6 family protein
medtr3g118030.1	c42167.graph_c0		-1.16845	-1.0584		Ribosomal protein L5
medtr1g045410.1	c37204.graph_c0		-1.2226	-1.22009		Ribosomal protein L4/L1 family
medtr3g107995.1	c52284.graph_c0	-1.10894			-1.70792	Zinc finger family protein
medtr5g081705.1	c39011.graph_c0		-1.30677			Ribosomal protein L35Ae family protein
medtr1g115545.1	c27937.graph_c0		-1.05427	-1.32114		Ribosomal L29 family protein
medtr1g067490.1	c34734.graph_c0		-1.03052			Ribosomal L29 family protein
medtr8g085740.1	c41784.graph_c0		-1.46229			Ribosomal protein L32e
medtr8g101980.1	c27693.graph_c0		-1.08446			Ribosomal protein L31e family protein
medtr1g098540.1	c42649.graph_c0		-1.57247	-1.25387		Ribosomal protein 1
medtr8g015570.1	c36262.graph_c0		-1.20278	-1.29042		Ribosomal L28e protein family
medtr3g077050.1	c38299.graph_c0		-1.24808	-1.05426		Ribosomal protein L18e/L15 superfamily protein
medtr2g035930.1	c41221.graph_c0		-1.16869	-1.34951		Ribosomal L27e protein family
medtr5g015570.1	c33860.graph_c0		-1.60658	-1.53906		Translation protein SH3-like family protein
medtr7g098290.1	c17706.graph_c0		-1.03252			Embryo defective 2171
medtr1g069585.1	c49844.graph_c1		-1.07064			Embryo defective 2171
medtr5g091120.1	c43467.graph_c0		-1.102			60S ribosomal protein L18A-1
medtr1g083460.1	c28183.graph_c0		-1.28798			Ribosomal protein L18e/L15 superfamily protein
medtr7g108805.1	c36331.graph_c0		-1.03632			Ribosomal protein L18e/L15 superfamily protein
medtr8g080460.1	c37513.graph_c0		-1.07611			Ribosomal protein L22p/L17e family protein
medtr3g078653.1	c32252.graph_c0		-1.34723	-1.07356		Ribosomal protein L23/L15e family protein
medtr4g120770.1	c32237.graph_c0		-1.05691			Ribosomal protein L14
medtr1g075720.1	c37079.graph_c0		-1.15381	-1.43484		Ribosomal protein L14
medtr1g022165.1	c46630.graph_c1		-1.24916			Breast basic conserved 1
medtr4g059400.1	c44959.graph_c0		-1.08622	-1.07423		Ribosomal protein L11 family protein
medtr3g062600.1	c35127.graph_c0	1.2467				60S ribosomal protein L10
medtr3g095810.1	c43214.graph_c2		-1.01377	-1.08324		40s ribosomal protein SA B
medtr8g012325.1	c31454.graph_c0		-1.18583			Ribosomal protein S8e family protein
medtr7g053450.1	c40999.graph_c0		-1.14847			Ribosomal protein S8e family protein
medtr4g088595.1	c32659.graph_c0		-1.62209	-1.16729		Ribosomal protein S6
medtr4g014590.1	c46685.graph_c0		-1.56377	-3.00418	-1.9262	Ribosomal protein S4 family protein
medtr1g103100.1	c44243.graph_c0		-1.12881	-1.32122		Ribosomal protein S3Ae
medtr2g015680.1	c17698.graph_c0		-1.08901			Ribosomal protein S27
medtr2g086610.1	c36098.graph_c0		-1.39285	-1.80312		Ribosomal protein S25 family protein
medtr1g081410.1	c33222.graph_c0		-1.1185	-1.17362		Ribosomal protein S24e family protein
medtr3g013635.1	c28212.graph_c0		-1.11153	-1.12786		Ribosomal protein S19e family protein
medtr4g117470.1	c36413.graph_c0		-1.31016			Ribosomal protein S8 family protein
medtr8g105110.1	c17561.graph_c0		-1.4326			Ribosomal protein S19 family protein
medtr1g102360.1	c38339.graph_c0	1.58558			3.40349	Protein kinase superfamily protein
medtr4g128990.1	c43769.graph_c0	1.27172	1.15999			Protein kinase superfamily protein
medtr7g084250.1	c38875.graph_c0		1.49581			Protein kinase superfamily protein
medtr5g032060.1	c46903.graph_c1	1.79811				Kinase interacting (KIP1-like) family protein
medtr5g023150.1	c36837.graph_c0	-1.2779		1.26808		ACT-like protein tyrosine kinase family protein
medtr1g026160.1	c47910.graph_c0		-4.29156	-5.85394	-2.98212	ACT-like protein tyrosine kinase family protein
medtr7g053200.1	c46297.graph_c0	1.22057				AGC kinase family protein
medtr8g011780.1	c45787.graph_c0	1.51075			1.20095	AGC2-1
medtr2g105010.1	c45779.graph_c1	-1.26004		1.06471		CBL-interacting protein kinase 25
medtr7g089300.1	c23868.graph_c0		-1.1929	-1.67899		Chaperonin 10
medtr3g011930.1	c47695.graph_c0		-1.28051	-1.35865		Cysteine-rich RLK 10
medtr3g110030.1	c46760.graph_c0		-1.22919			GroES-like family protein
medtr1g028300.1	c49271.graph_c0	1.20691	1.2413			Highly ABA-induced PP2C gene 3
medtr1g071540.1	c53135.graph_c0		-1.05914			Kinase interacting (KIP1-like) family protein
medtr4g093110.1	c39434.graph_c0	1.22511			2.19776	Lectin protein kinase family protein
medtr1g090937.1	c39704.graph_c0	-1.62216		-3.10017	-4.97378	Lectin protein kinase family protein
medtr2g036430.1	c43613.graph_c0		-1.28572			Lectin protein kinase family protein
medtr2g090410.1	c53353.graph_c0	1.02262			1.27504	Lectin protein kinase family protein
medtr5g059880.1	c7735.graph_c0	1.14188		4.26116	4.93867	MAPK/ERK kinase kinase 1
medtr8g089975.1	c33830.graph_c0	1.48			3.66507	OPEN STOMATA 1
medtr5g085300.1	c42644.graph_c0	1.18725				Phosphoprotein phosphatase activity
medtr3g498735.1	c41857.graph_c0	1.07315	1.34088			Propyzamide hypersensitive 1
medtr8g027990.1	c48829.graph_c1	1.23654		-2.74577	-1.62148	Protein kinase family protein
medtr6g074670.1	c53385.graph_c0	1.53309	2.80443			Protein kinase superfamily protein
medtr8g442400.1	c47590.graph_c0		-1.02058			Protein kinase superfamily protein
medtr2g020970.1	c36880.graph_c0	1.2208				Protein phosphatase 2C family protein
medtr4g123080.1	c44071.graph_c0	1.52234			1.13118	Protein phosphatase 2C family protein
medtr1g014190.1	c46480.graph_c0		1.13179		-1.32546	Protein phosphatase 2C family protein
medtr1g110210.1	c50682.graph_c0	-1.14321				Protein phosphatase 2C family protein
medtr7g056667.1	c52753.graph_c0		-1.08368			Protein serine/threonine kinases
medtr5g016550.1	c47934.graph_c0		1.37987			Protein tyrosine phosphatase activity
medtr8g052190.1	c35538.graph_c0	-1.80934		4.51744	2.12673	Receptor kinase 3
medtr4g081665.1	c52734.graph_c0	1.32488			1.44328	Receptor kinase 3
medtr2g068650.1	c35424.graph_c0	1.47414			2.12661	Receptor-like protein kinase 1
medtr4g114270.1	c46739.graph_c0	1.29078			3.5327	Receptor-like protein kinase 1
medtr5g013070.1	c52658.graph_c0	1.32777		1.83495	3.09218	Receptor-like protein kinase 1
medtr2g067980.1	c53482.graph_c0	1.46298			2.04328	Receptor-like protein kinase 1
medtr8g432510.1	c47762.graph_c0		-1.2435		1.02455	Shaggy-like protein kinase 32
medtr7g056450.1	c49873.graph_c0	1.4566			1.26462	S-locus lectin protein kinase family protein
medtr8g013610.1	c49873.graph_c1	1.73617			1.6114	S-locus lectin protein kinase family protein
medtr7g056640.1	c51128.graph_c1		-1.09827	-2.86244	-1.38374	S-locus lectin protein kinase family protein
medtr8g465160.1	c52962.graph_c0	1.1684		-1.21435		S-locus lectin protein kinase family protein

## Sheet: Proteasom
M. truncatula ID	Unigene	(D+LT)/D	(ND+LT)/ND	D/ND	(D+LT)/(ND+LT)	Annotation
medtr7g096720.1	c51515.graph_c2		1.21501			ABA mannose pathway regulator 1
medtr4g107010.1	c38580.graph_c0	2.28507	2.03956	2.38065	2.51499	ARM repeat superfamily protein
medtr5g020570.1	c39552.graph_c1		-1.10854			ARM repeat superfamily protein
medtr4g485520.1	c44595.graph_c0	-1.10961		1.08248		ARM repeat superfamily protein
medtr1g076400.1	c47490.graph_c0	1.25977				ARM repeat superfamily protein
medtr2g437720.1	c49995.graph_c0	1.17383			1.11953	Embryo sac development arrest 18
medtr3g436860.1	c19986.graph_c0		-1.39447	-2.27713	-2.44303	F-box family protein
medtr8g039500.1	c32013.graph_c0	1.53764		5.49252	5.35099	F-box family protein
medtr6g004210.1	c41455.graph_c1	-1.03155				F-box family protein
medtr1g072360.1	c46573.graph_c0	1.61448			1.37119	F-box family protein
medtr5g089110.1	c51296.graph_c0		-1.20531			F-box family protein
medtr1g115400.1	c7094.graph_c0	1.50383			1.66606	F-box family protein
medtr7g039630.1	c34641.graph_c0		-1.92109	-5.61574	-3.07416	F-box/RNI-like superfamily protein
medtr8g058970.1	c44350.graph_c0	-1.22002	-1.15327			F-box/RNI-like superfamily protein
medtr2g083840.1	c47658.graph_c0	-1.01304	-1.13924			F-box/RNI-like superfamily protein
medtr5g045170.1	c52347.graph_c1	1.97545			2.41309	F-box/RNI-like superfamily protein
medtr4g024710.1	c52906.graph_c0	1.26293				F-box/RNI-like superfamily protein
medtr8g105590.1	c36231.graph_c0	5.24838	2.31645			Flavin-binding/kelch repeat f box 1
medtr1g093730.1	c46468.graph_c0	1.59169	1.20801			Fragile-X-F-associated protein
medtr8g080370.1	c41069.graph_c1		-1.36333			Galactose oxidase superfamily protein
medtr2g102370.1	c51291.graph_c1		2.03554			Galactose oxidase superfamily protein
medtr1g008060.1	c50118.graph_c0	-1.26007				JmjC domain-containing protein
medtr1g079340.1	c52332.graph_c0	1.40082	1.05623			Phloem protein 2-B10
medtr7g059405.1	c47869.graph_c0	-1.2269		1.38502		Plant U-box 13
medtr2g023790.1	c44221.graph_c0		-1.09038	1.51836	2.69297	RING finger family protein
medtr3g095560.1	c33718.graph_c0	-1.79075			-1.24151	RING/U-box superfamily protein
medtr3g114500.1	c33823.graph_c0	2.05665			1.49706	RING/U-box superfamily protein
medtr3g071300.1	c35768.graph_c0	-1.03218		1.19197		RING/U-box superfamily protein
medtr3g086630.1	c37568.graph_c0	1.99055				RING/U-box superfamily protein
medtr1g043410.1	c42453.graph_c0	1.08075			1.80972	RING/U-box superfamily protein
medtr3g094000.1	c44532.graph_c0	-1.36288			-1.35082	RING/U-box superfamily protein
medtr1g064710.1	c48394.graph_c0	1.32766	1.08283	1.14645	1.38011	RING/U-box superfamily protein
medtr8g089880.1	c51222.graph_c0	1.32166			1.62428	RING/U-box superfamily protein
medtr2g022680.1	c33935.graph_c0	1.4163		-1.36505		RING-H2 group F1A
medtr4g057310.1	c48941.graph_c0	-1.54607			-1.68298	RING-type Zinc finger protein
medtr1g047740.1	c53244.graph_c0		1.98394			RING-type Zinc finger protein
medtr2g072530.1	c50856.graph_c0	1.41343				RNI-like superfamily protein
medtr4g013255.1	c52089.graph_c0	-1.11513				RNI-like superfamily protein
medtr8g066730.1	c36153.graph_c0		-1.10927			Zinc finger family protein
medtr3g037230.1	c46621.graph_c0	1.55035				Zinc finger family protein
medtr4g064570.1	c49185.graph_c0		1.42853	2.14662		Zinc finger family protein
medtr3g107995.1	c52284.graph_c0	-1.10894			-1.70792	Zinc finger family protein
